# Supplementary material for: Yeast Phenomics: An Experimental Approach for Modeling Gene Interaction Networks that Buffer Disease
Source: MDPI journal article supplement (doi:10.3390/genes6010024), 2015-02-06
Supplement: s1 [file s1]

### **Supplemental Data File 1: REMc and heatmaps for gene x media interaction screen.**

Q-HTCP was performed and gene x media interaction quantified as described in methods. REMc clustering was performed with the cluster naming convention as described in reference 12. There were 56 YKO/KD cultures that did not grow on YPD (control/reference media), for which the respective genes were omitted from the analysis. In cases where a particular YKO/KD strain did not yield a growth curve on a test media but did grown on YPD, K values were set to -130 and L to 90, representing extreme loss of fitness. The CPP-derived interaction and shift values are contained in Supplemental Data File 2 along with REMc results and GO Term enrichment (see reference 71 for details on enrichment analysis).

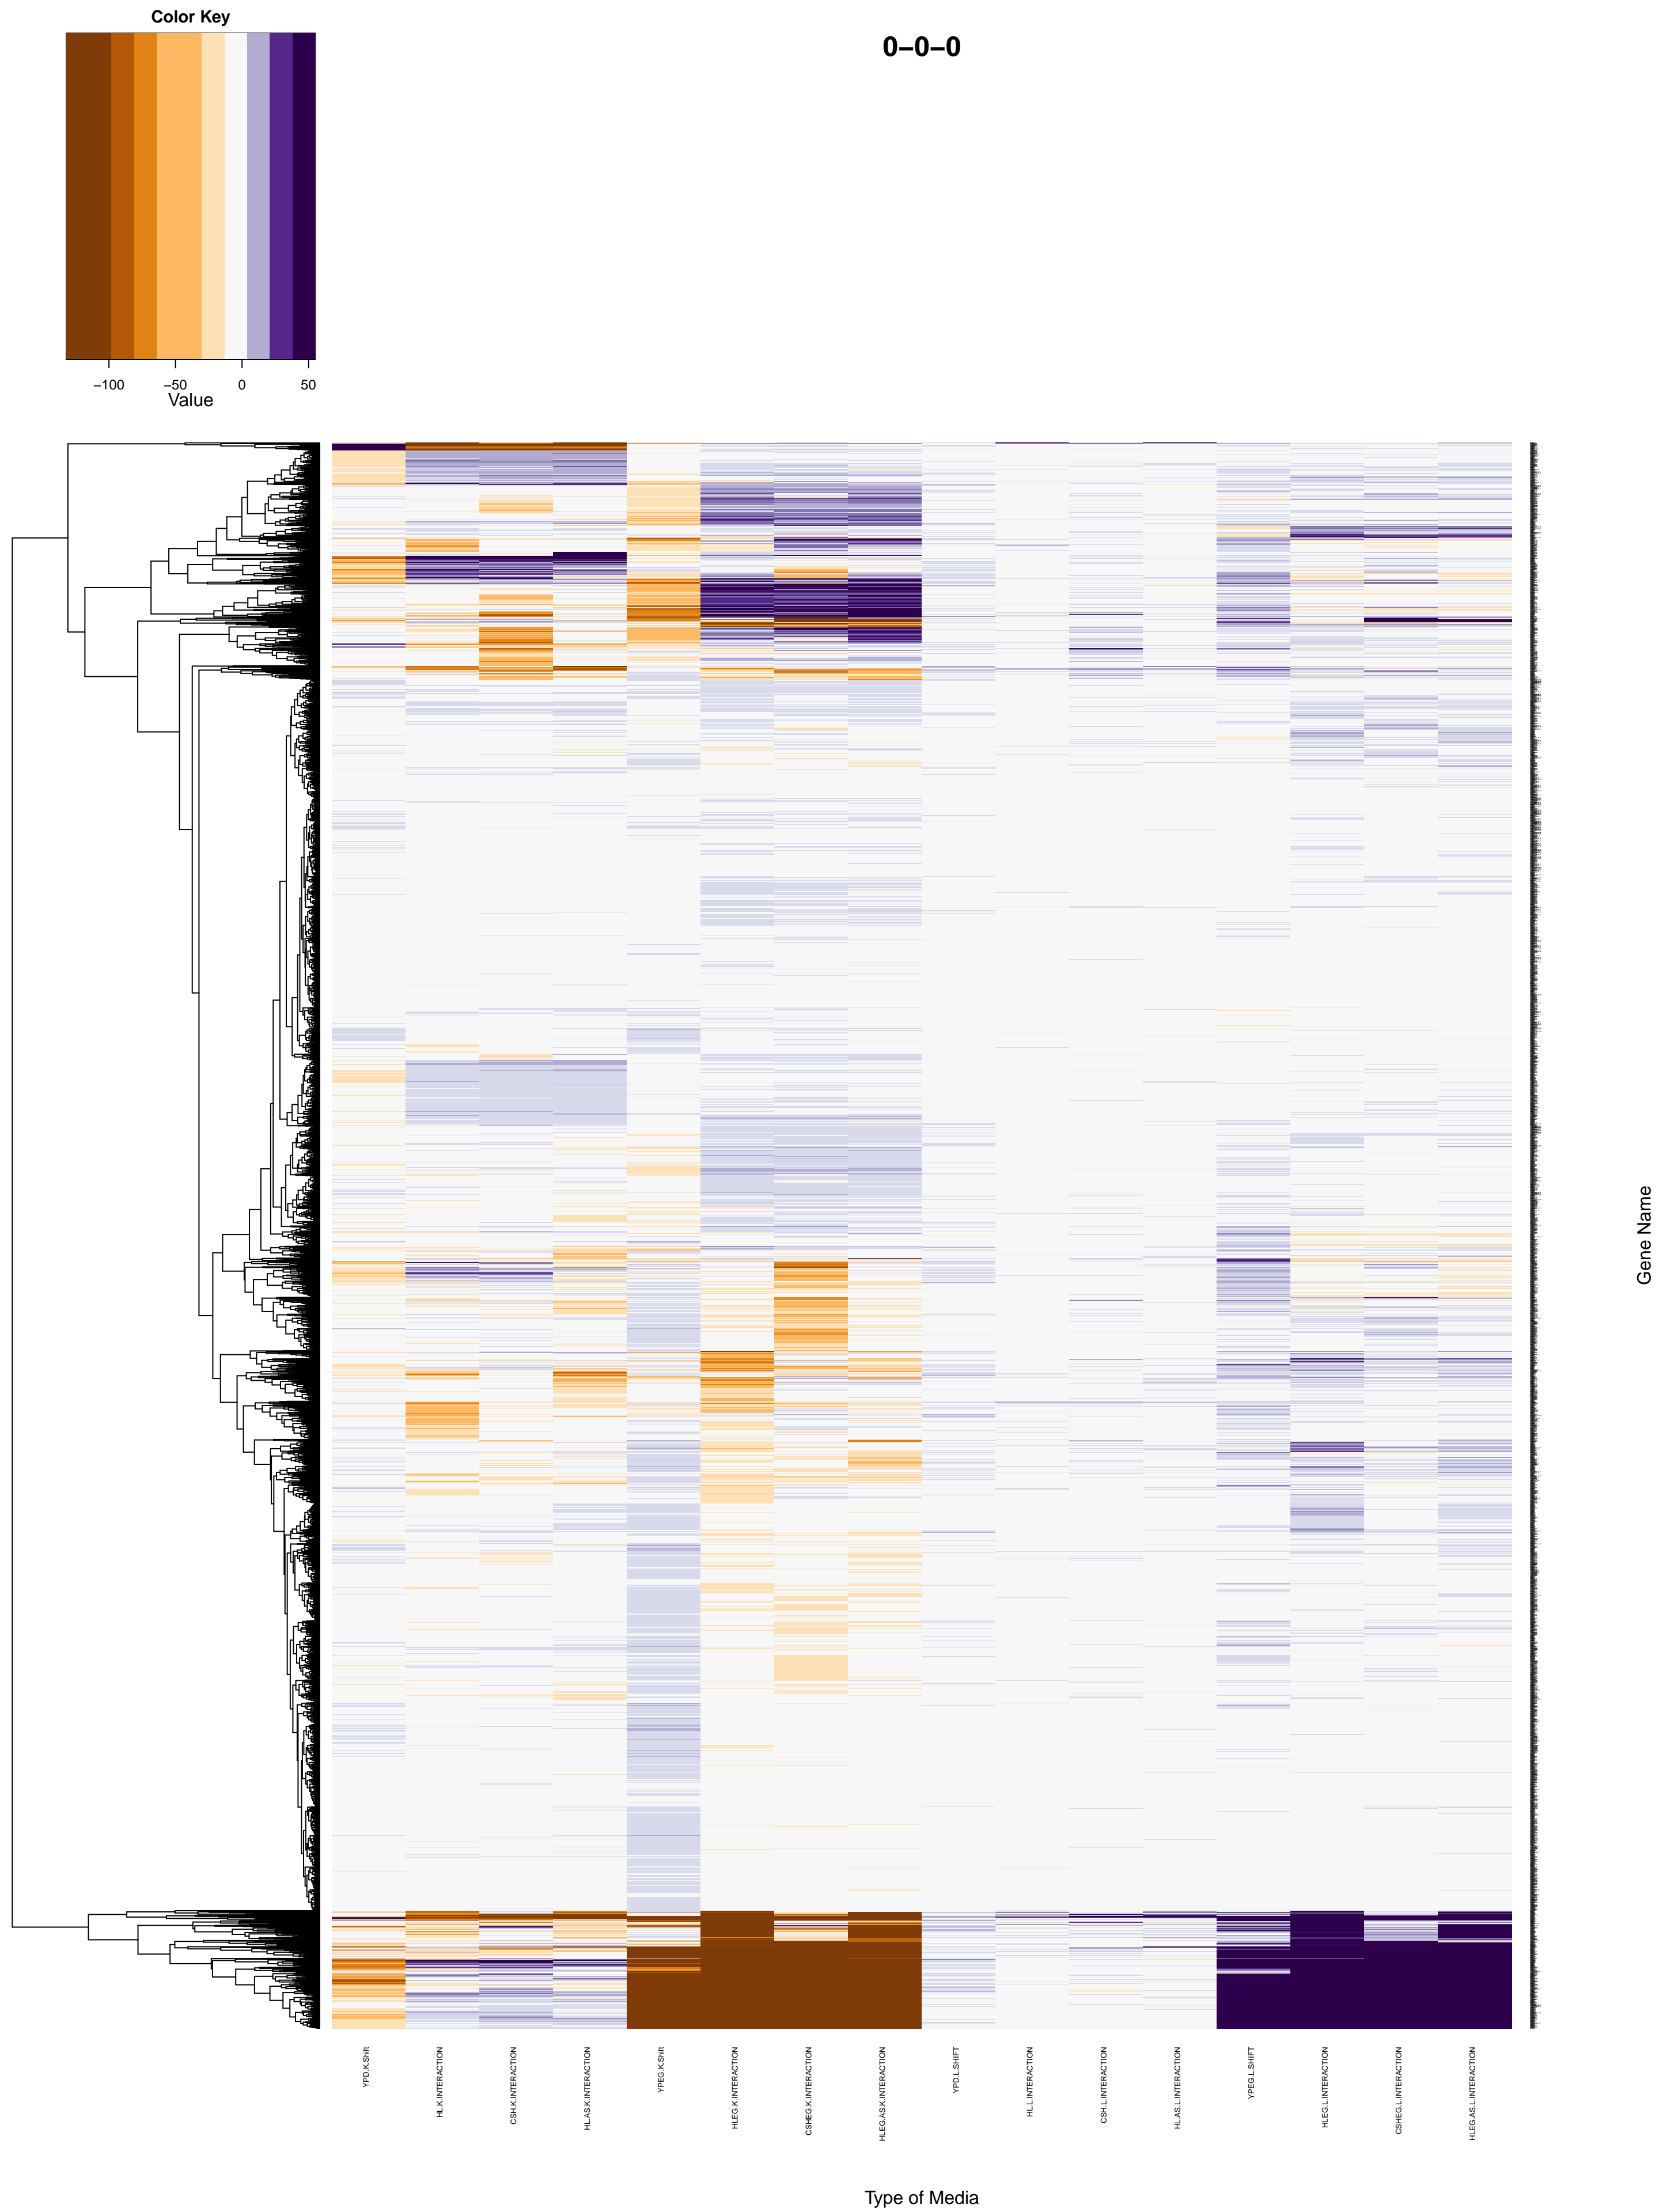

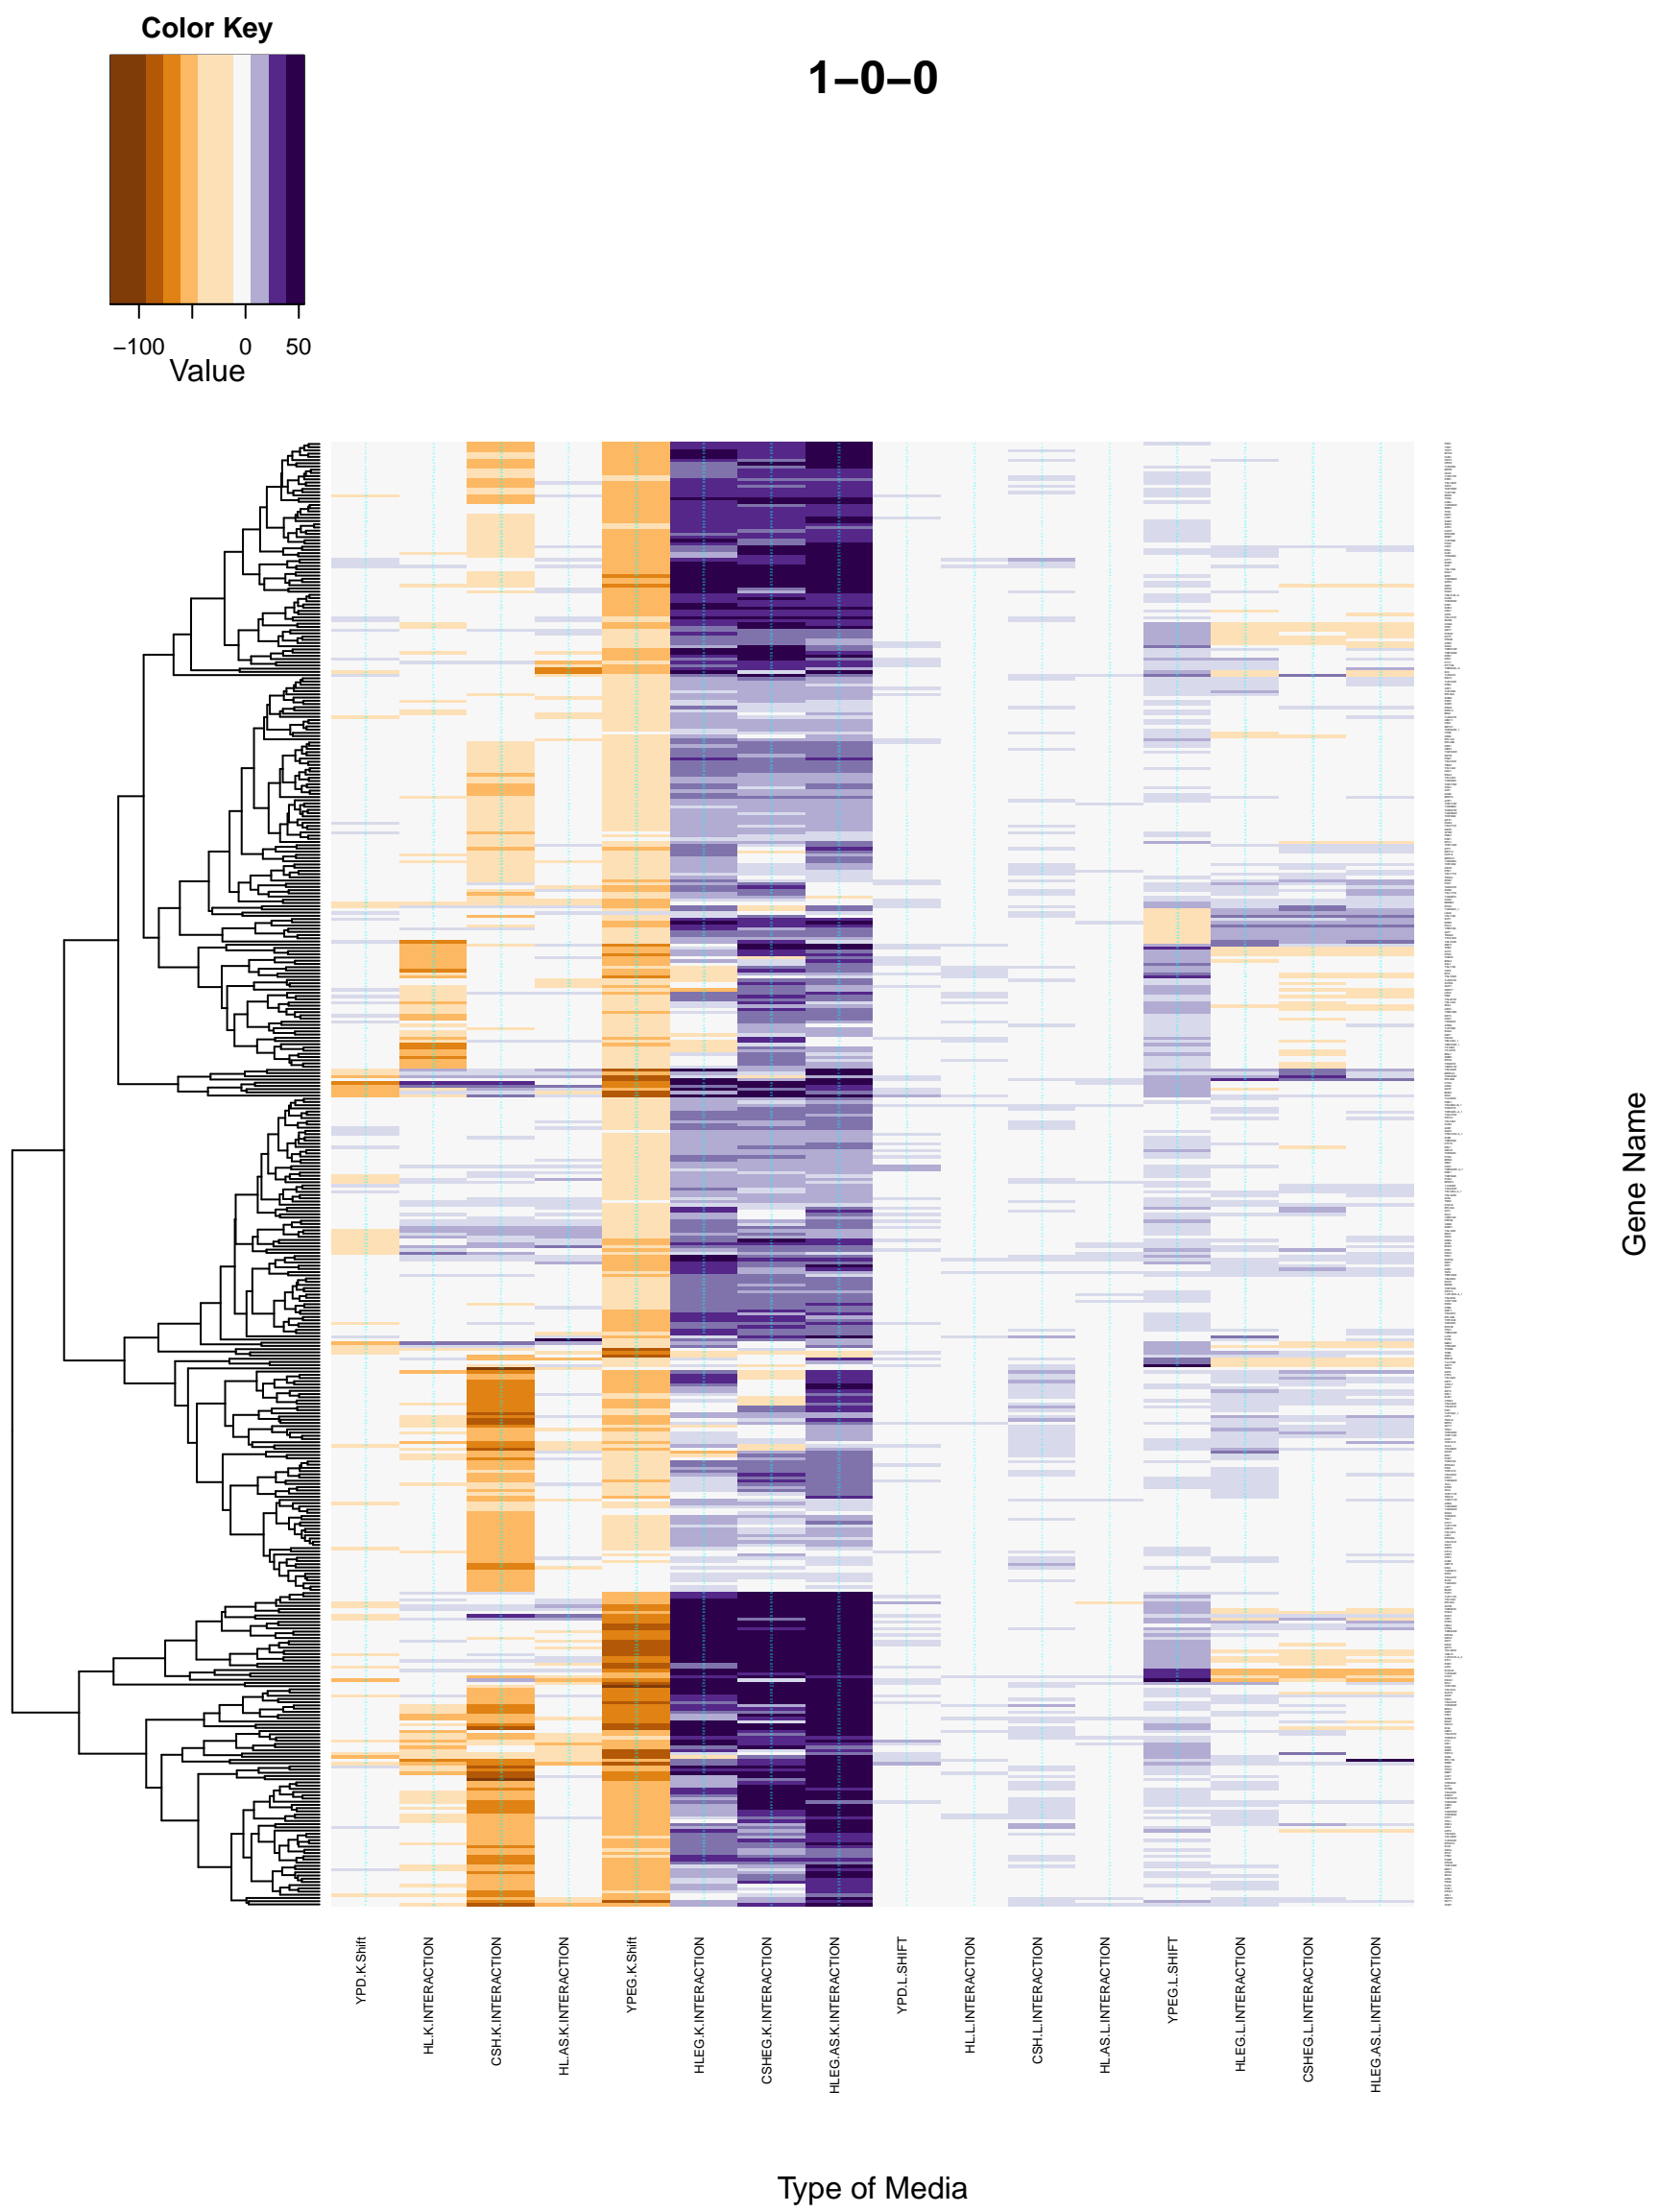

1-0-1

Color Key

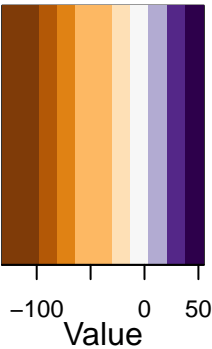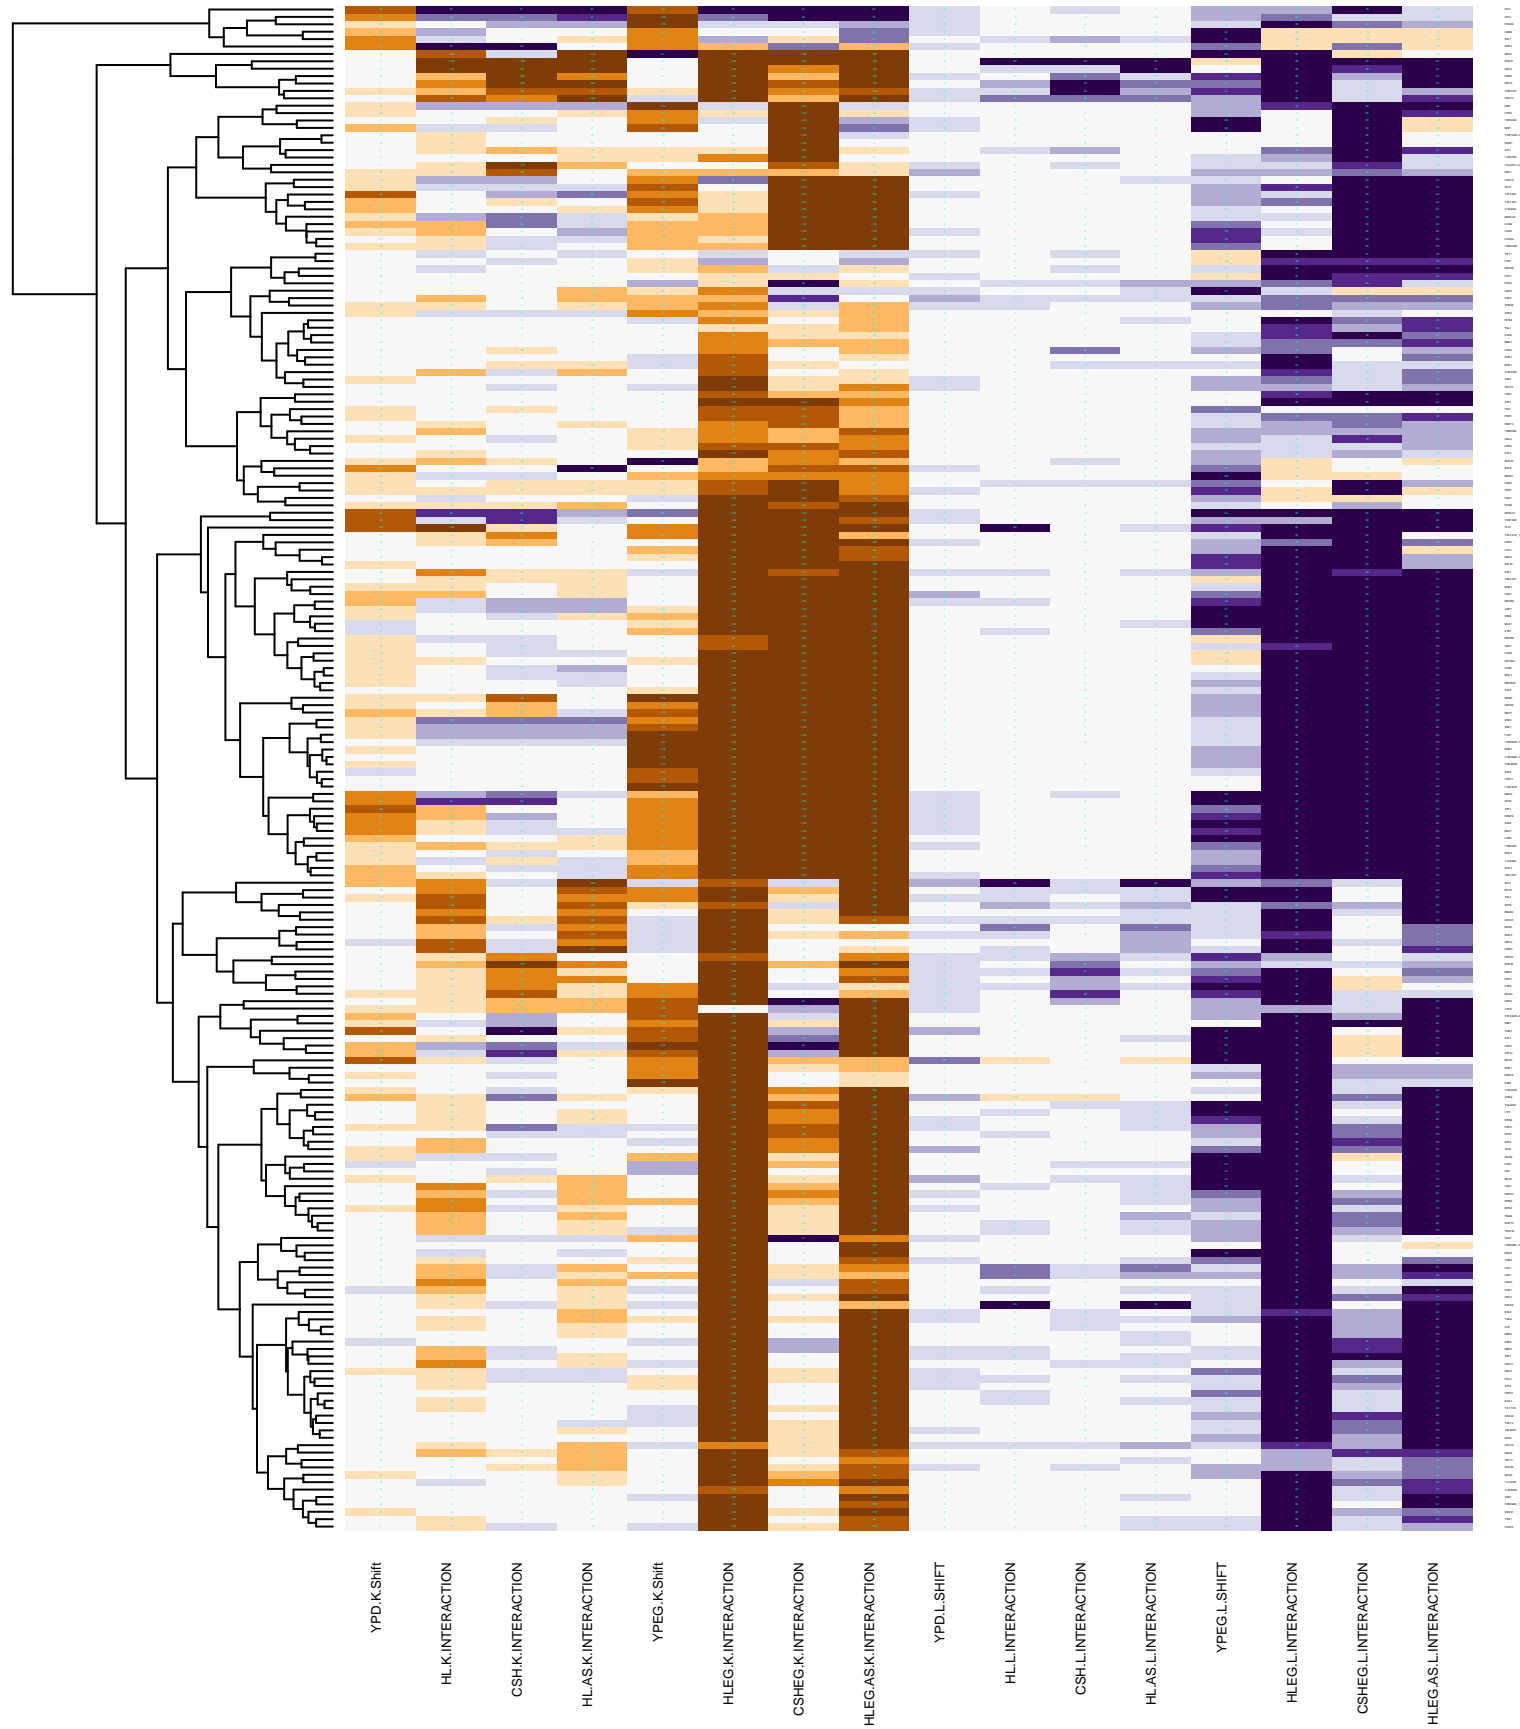

Type of Media

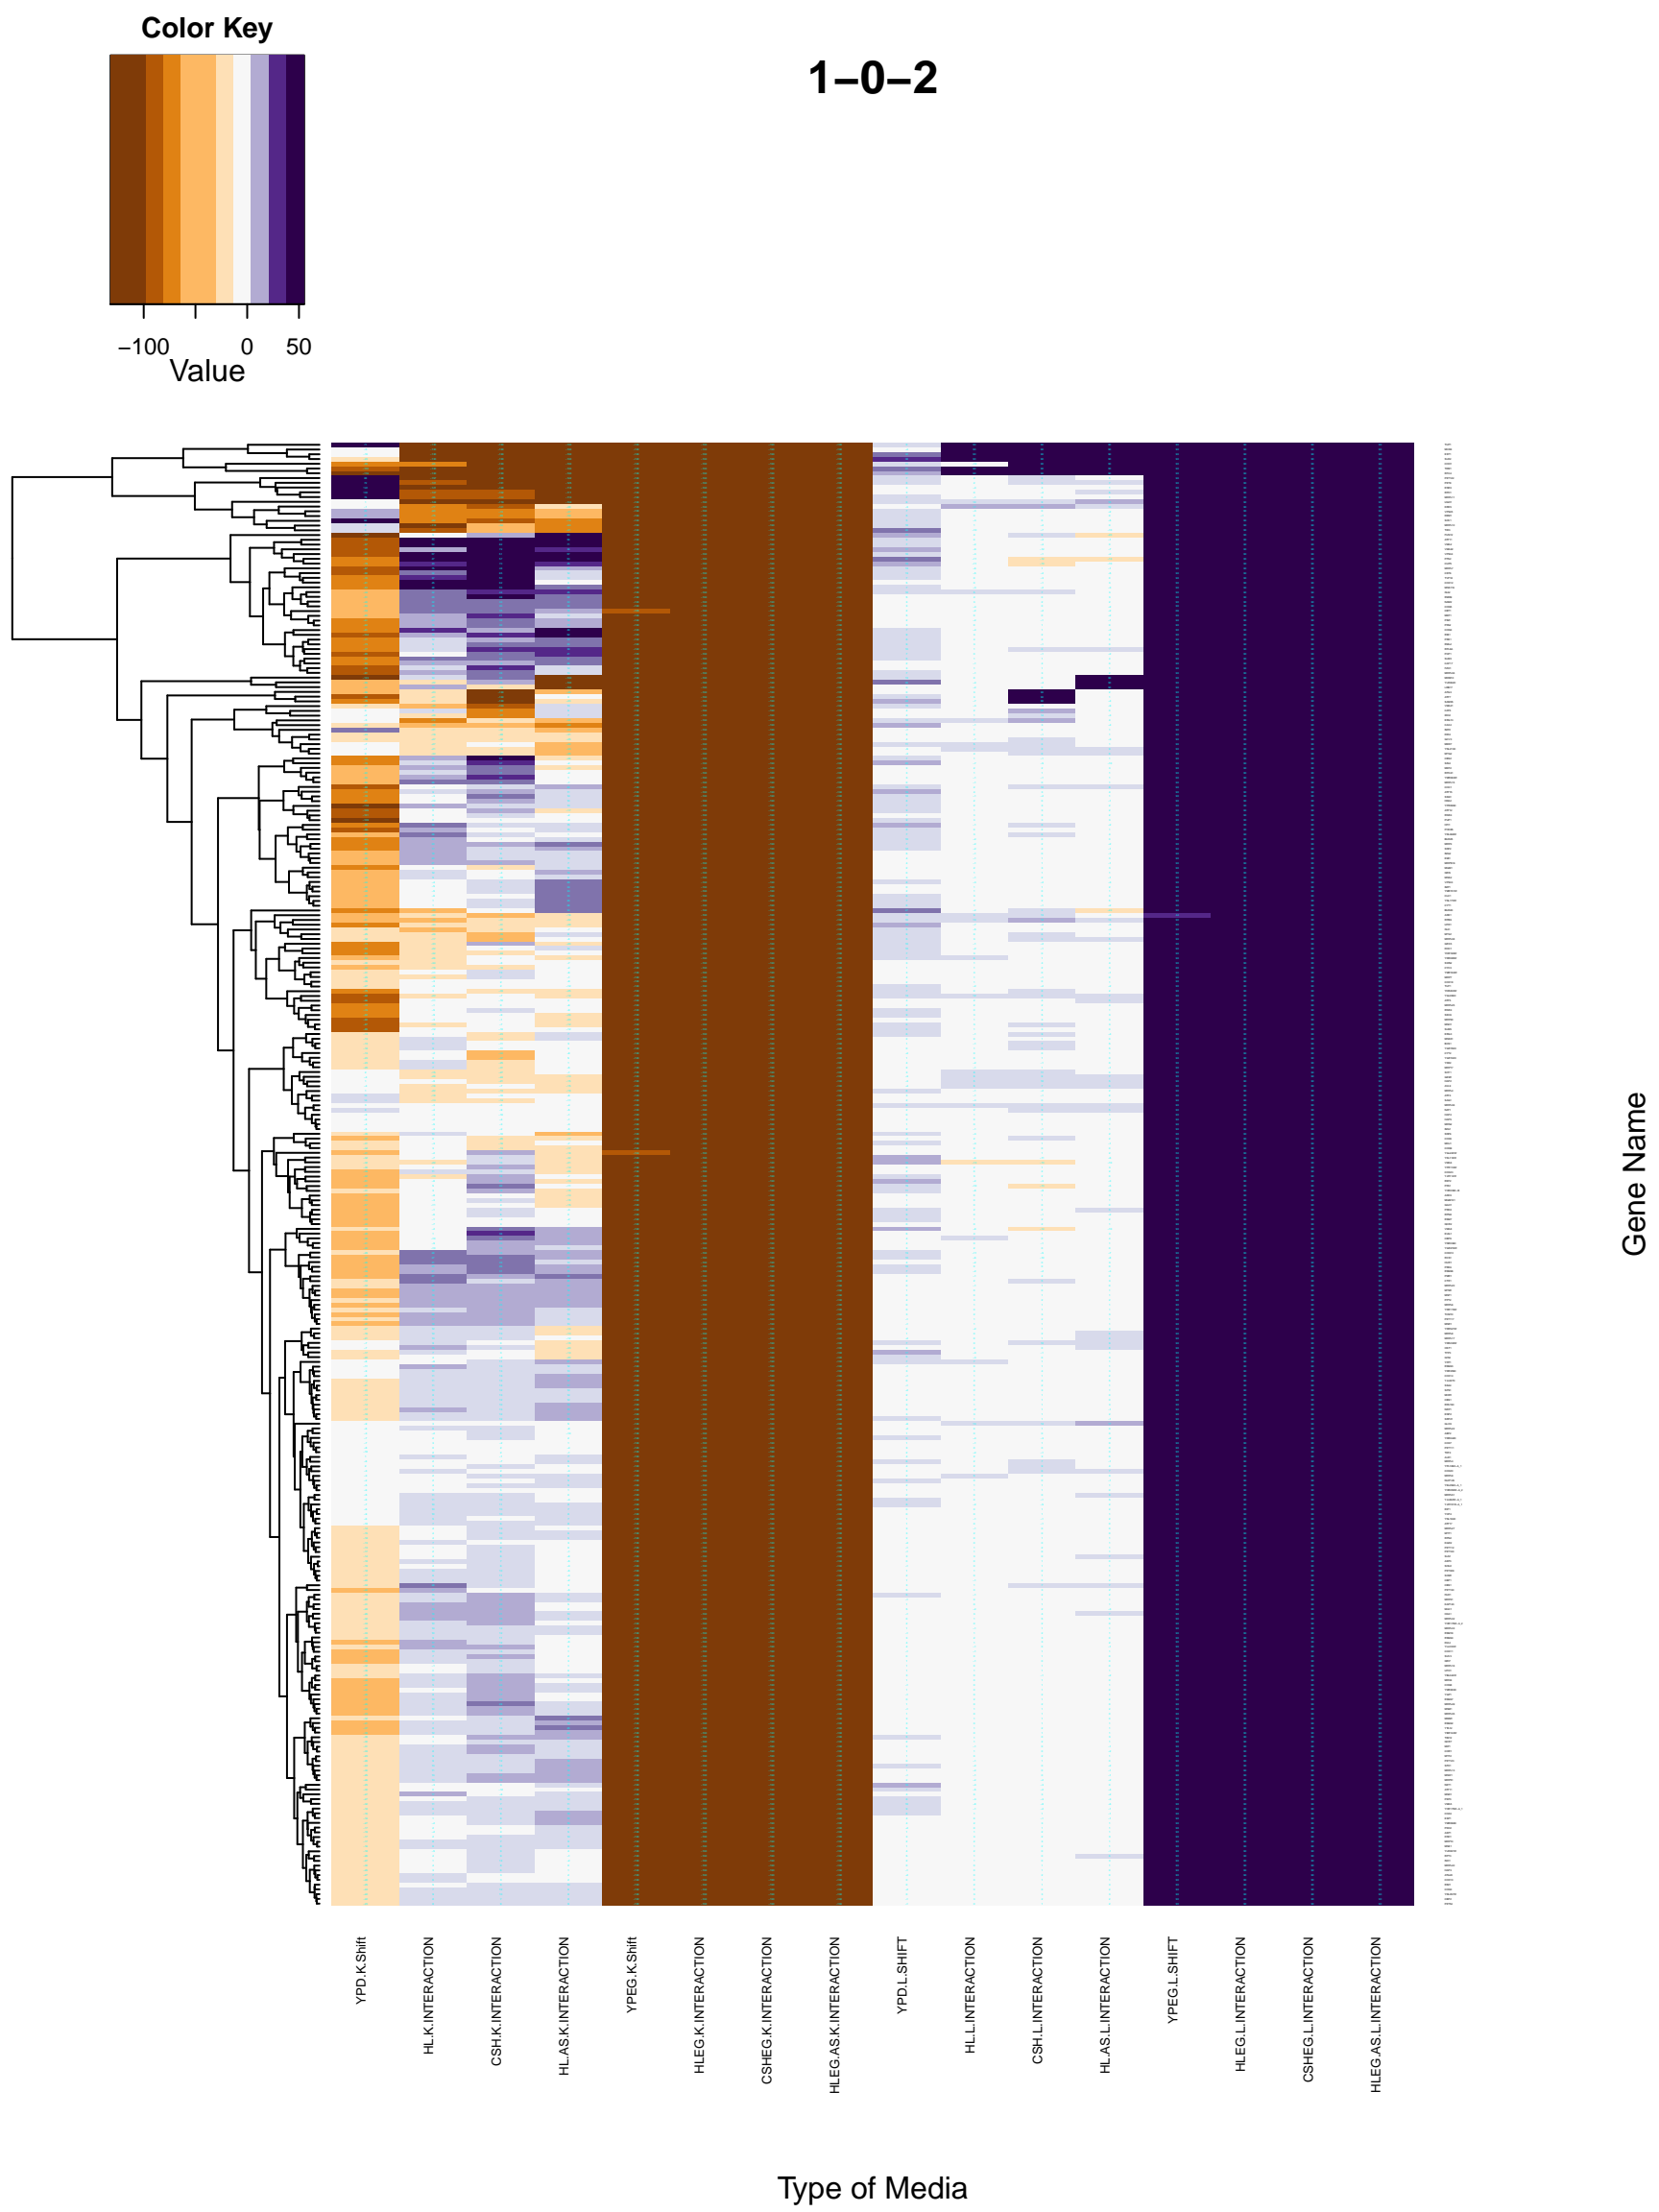

Color Key

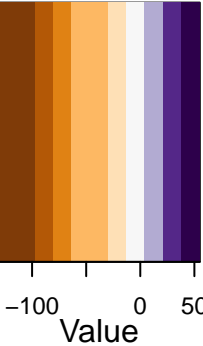

1-0-3

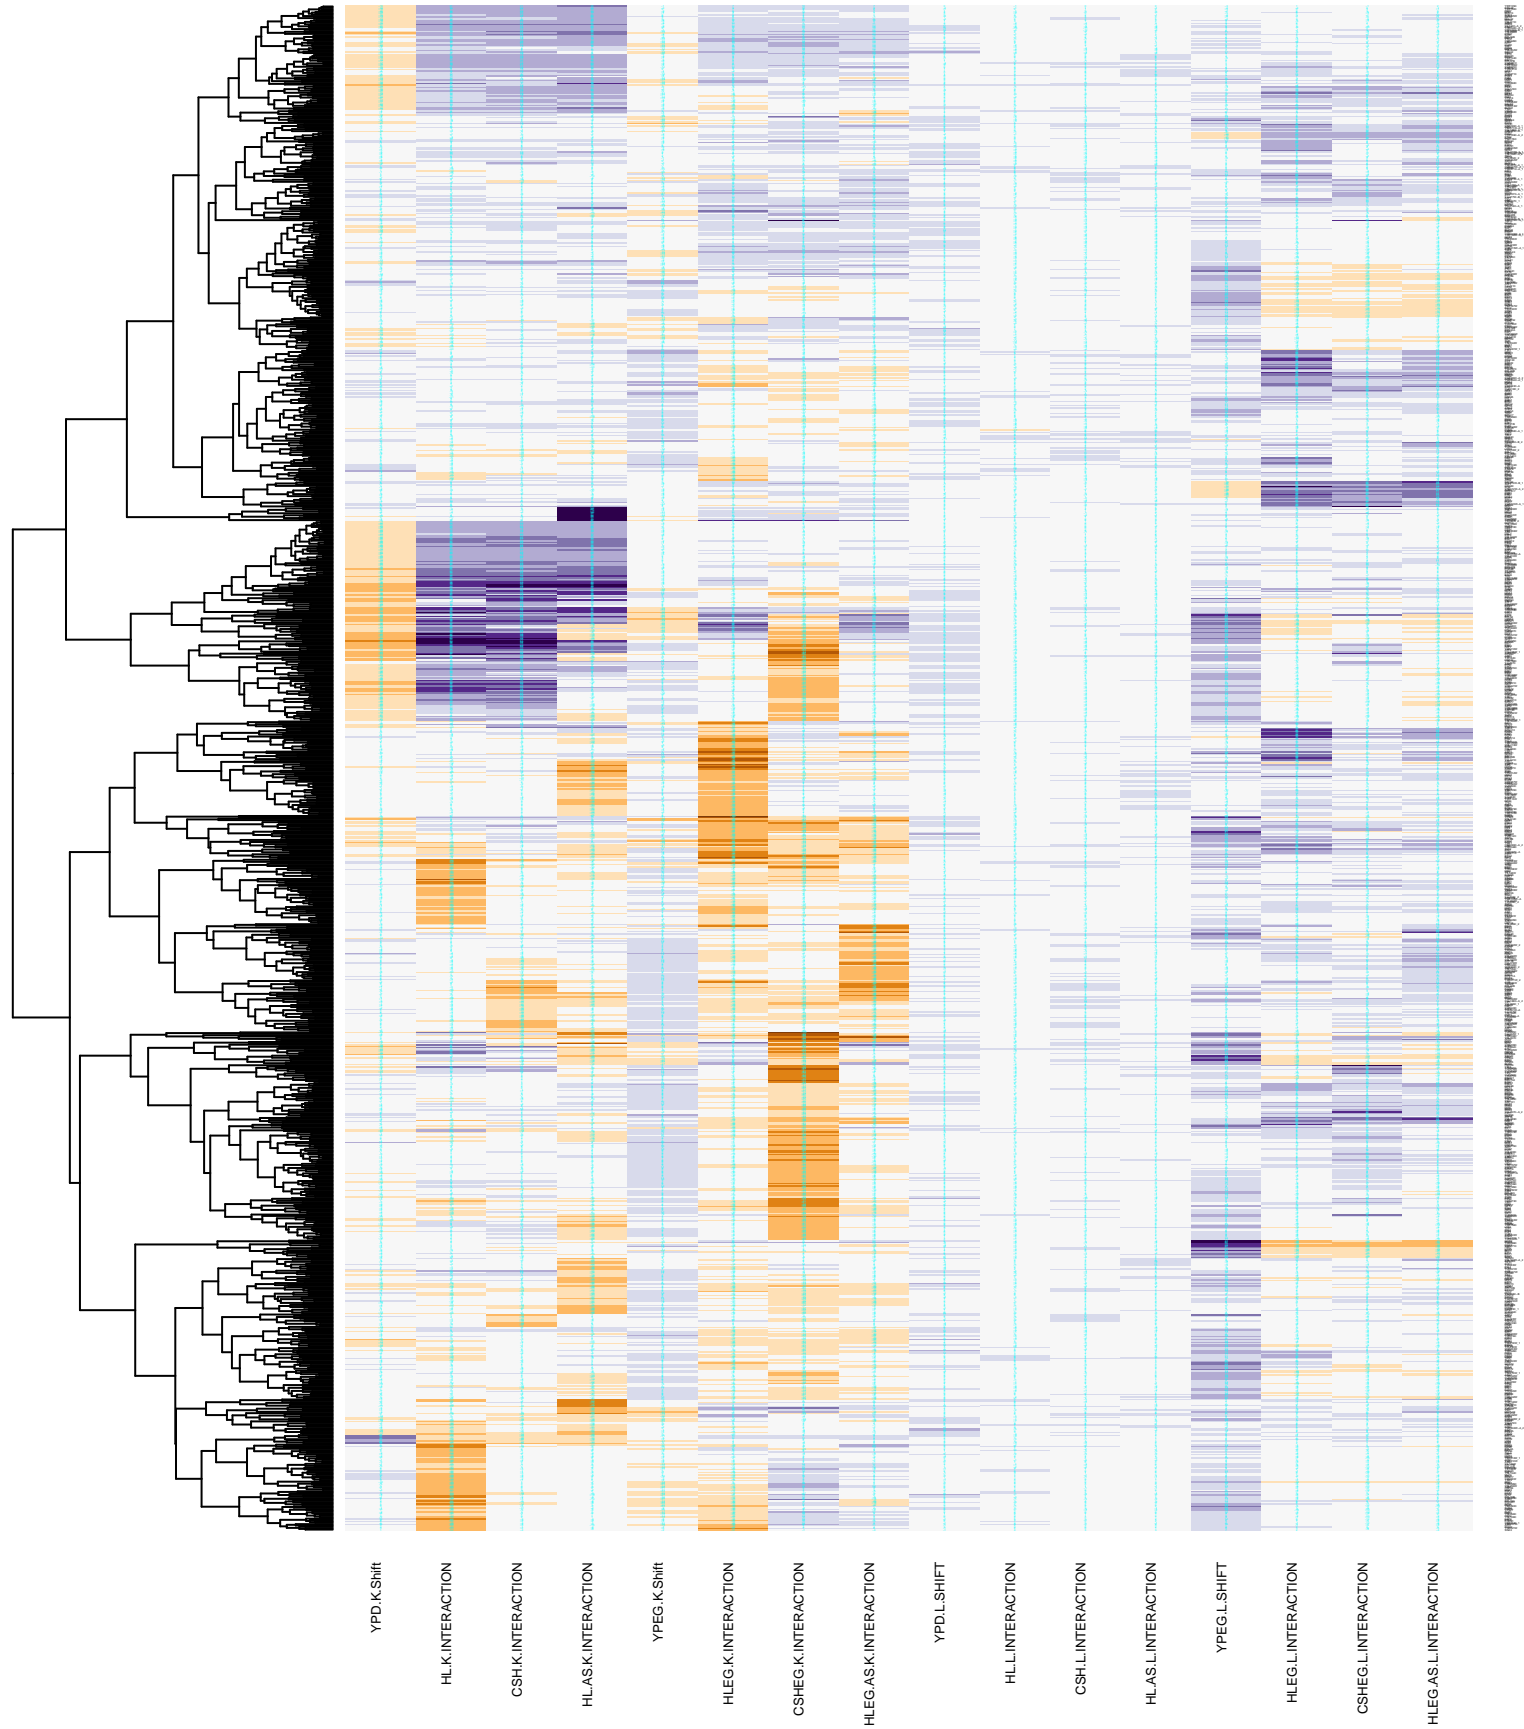

Color Key

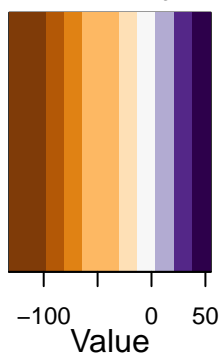

1-0-4

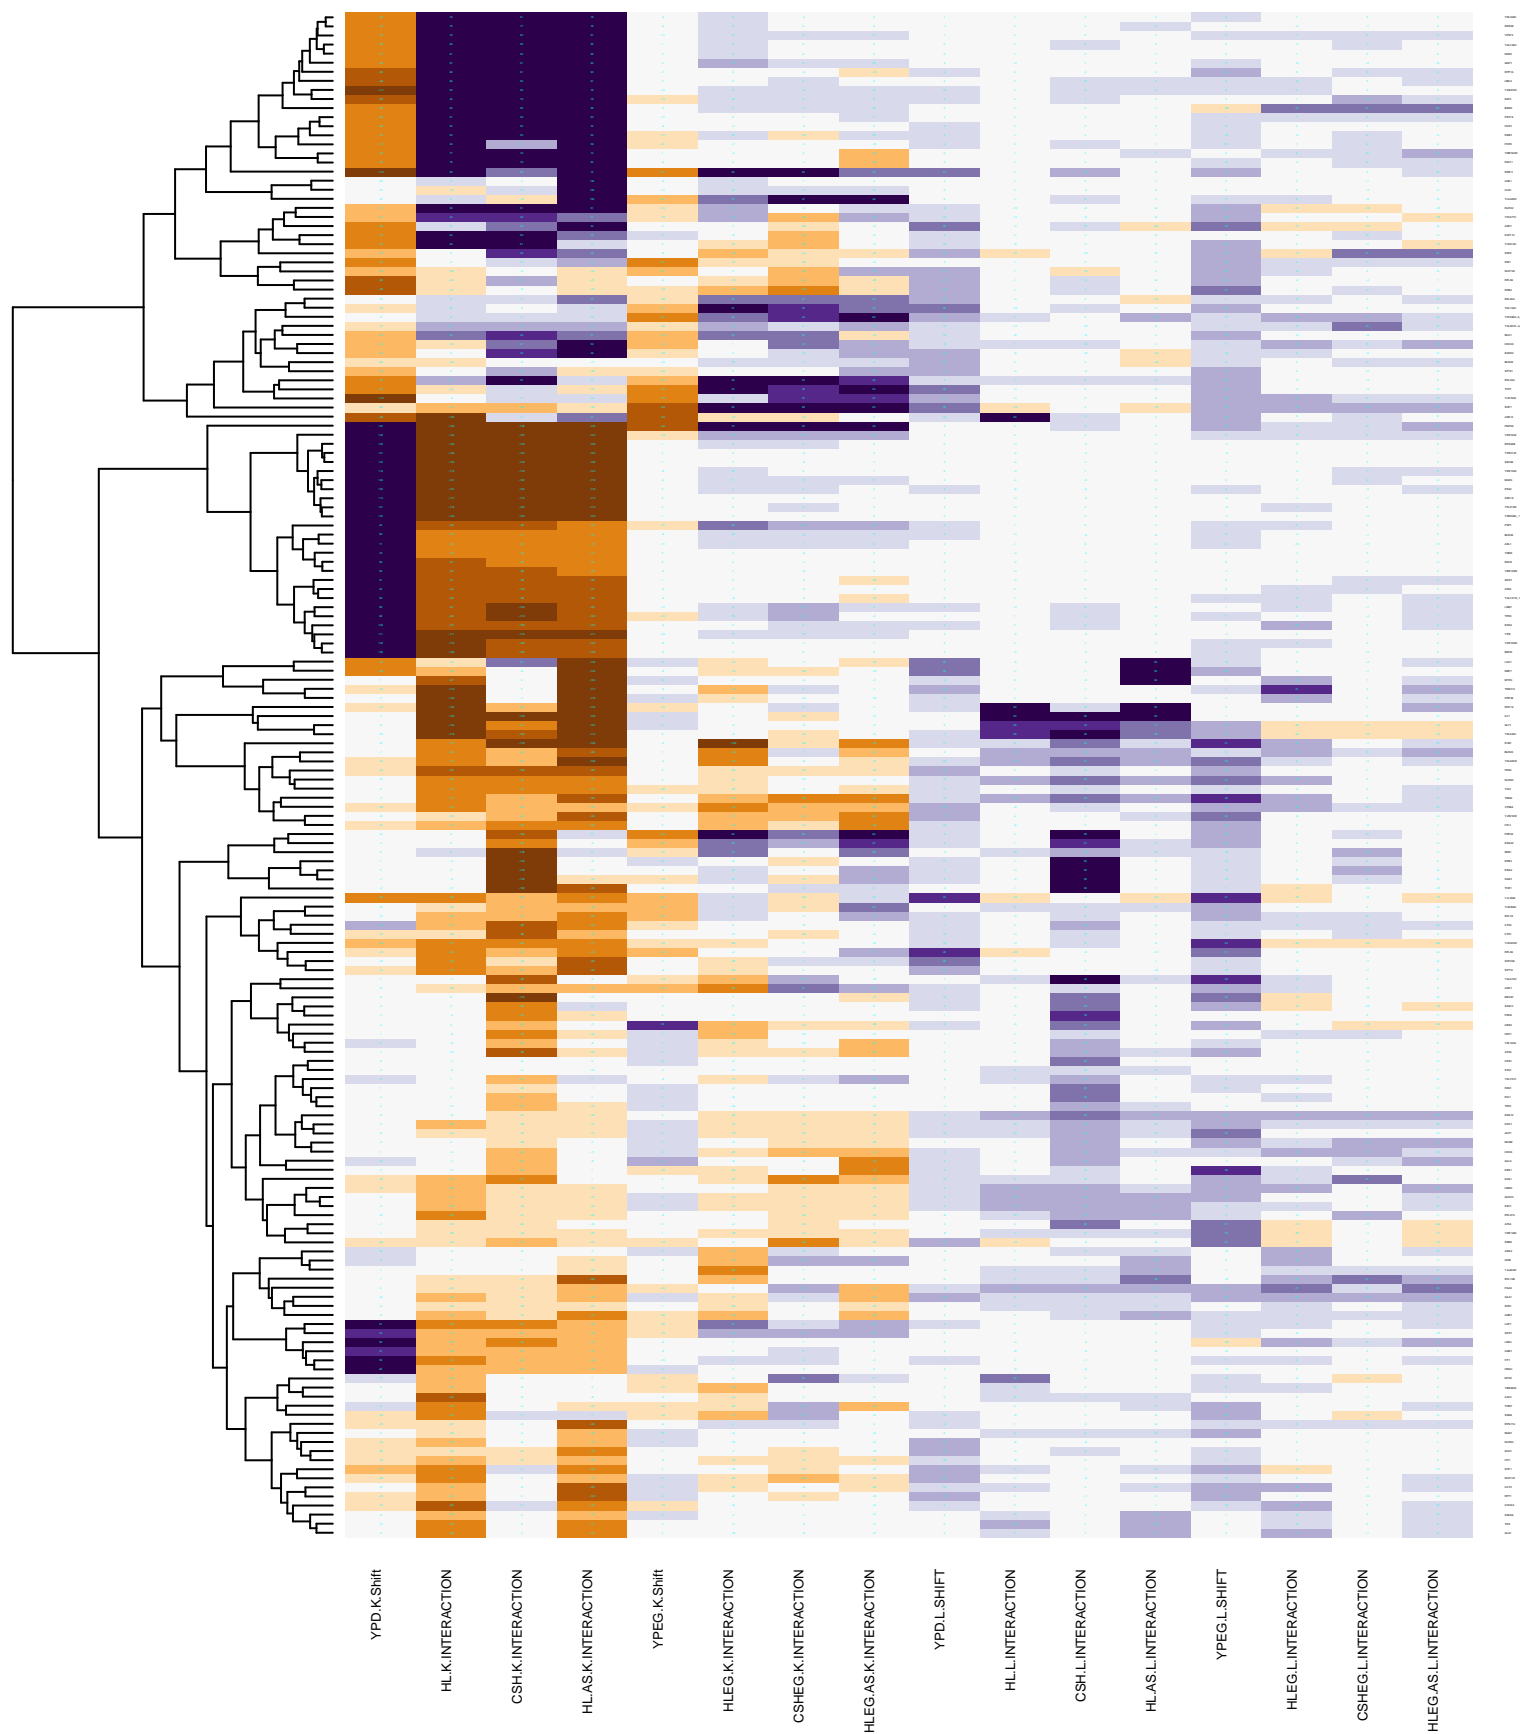

Type of Media

Color Key

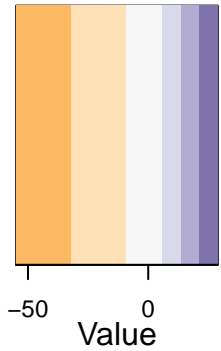

1-0-5

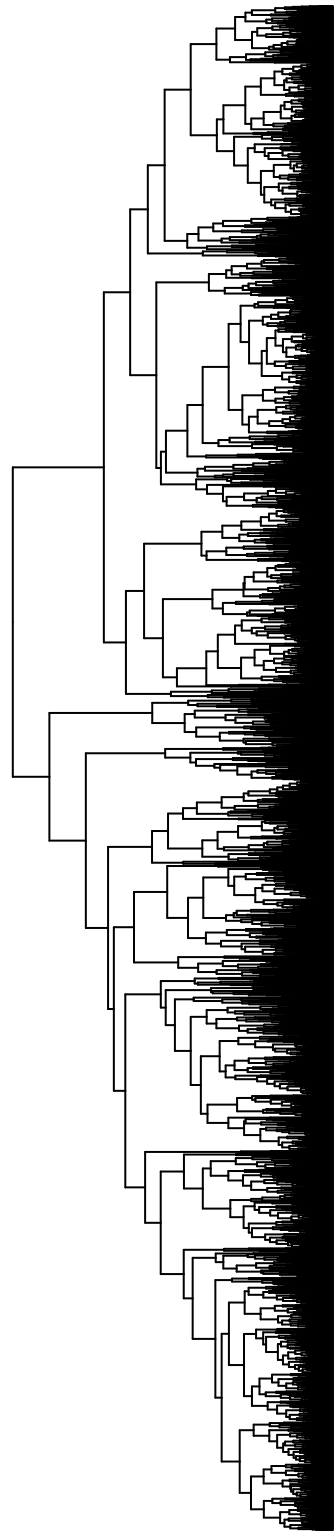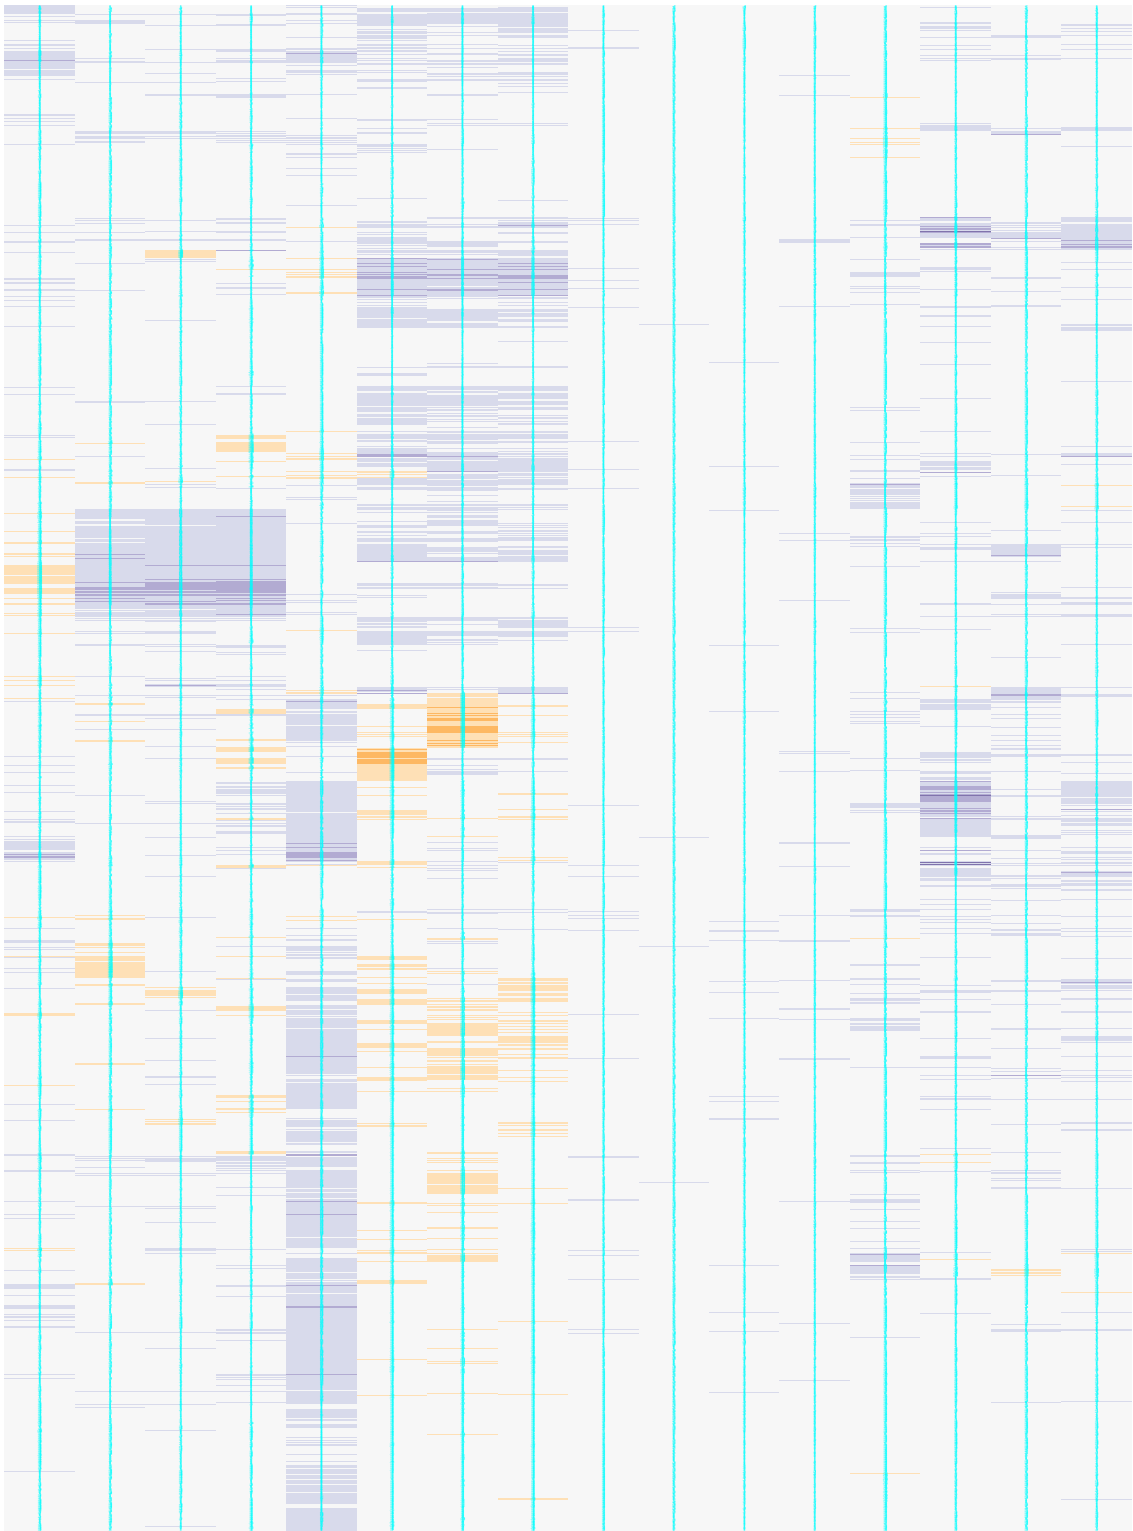

Gene Name

Type of Media

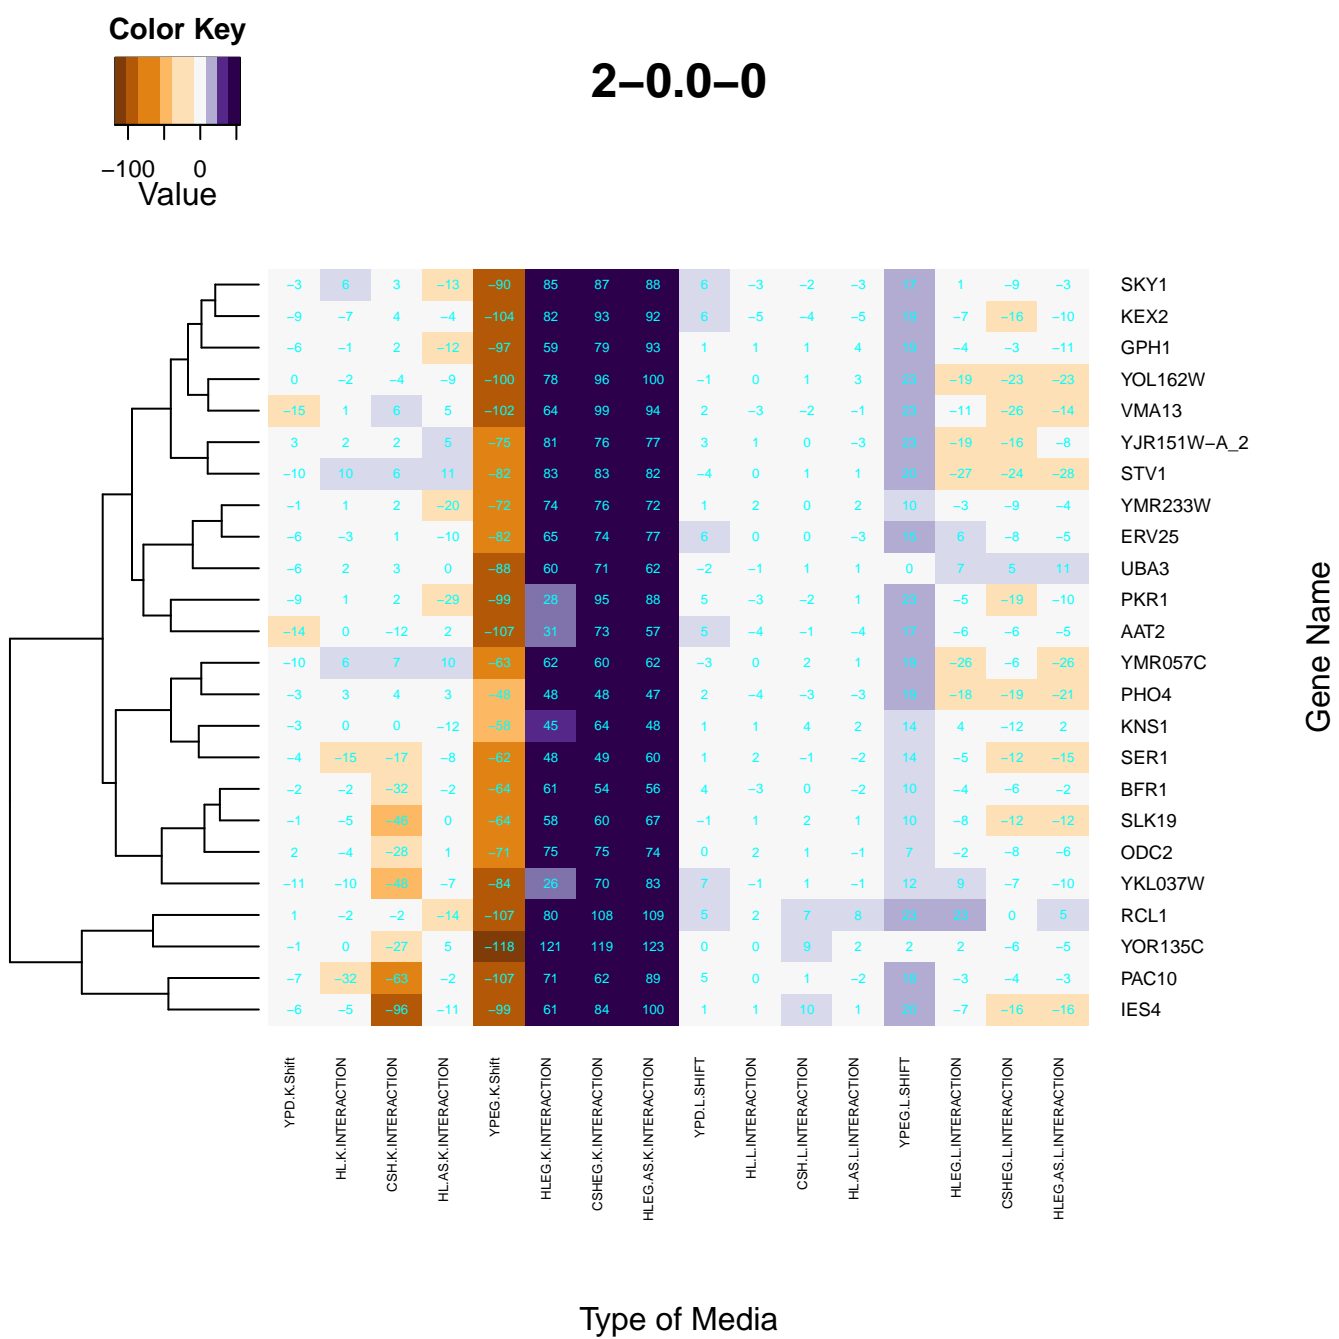

Color Key

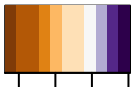

-100 0  
Value

2-0.0-1

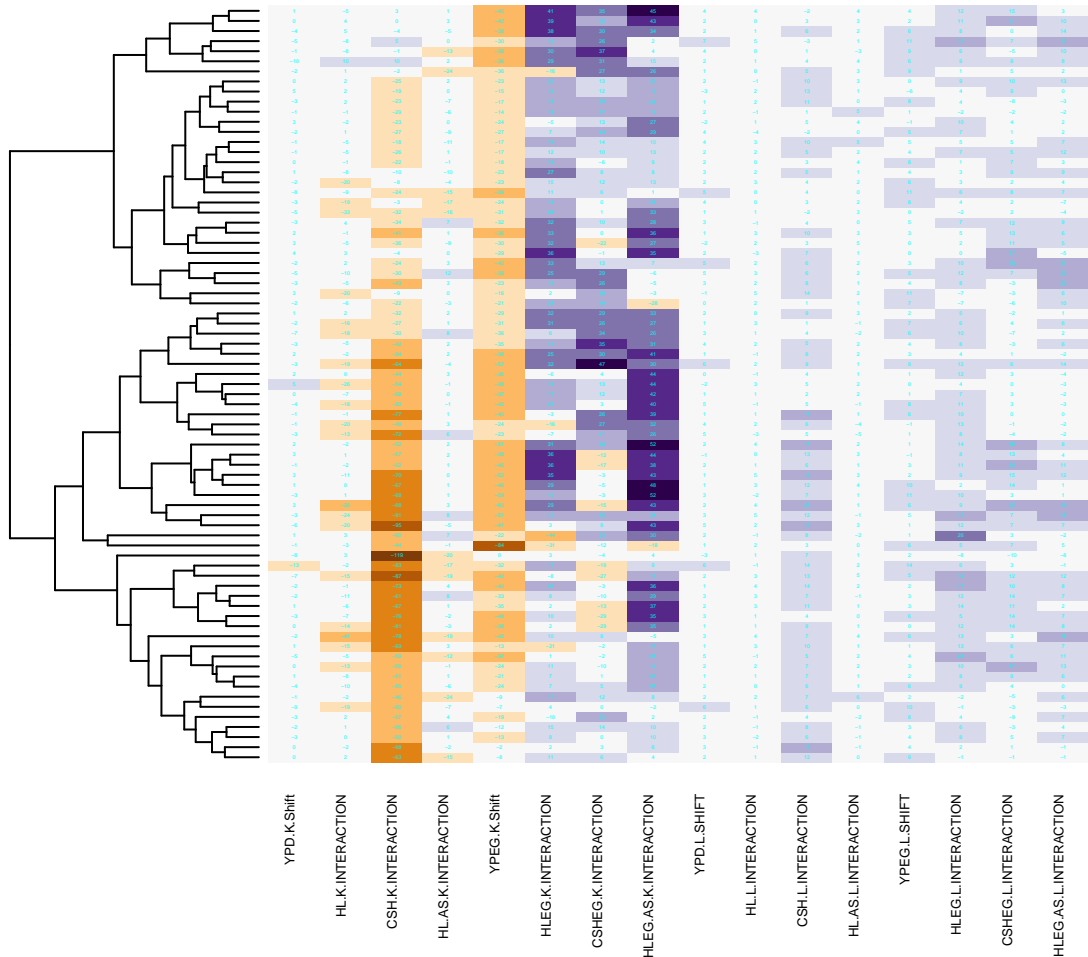

Gene Name

Type of Media

Color Key

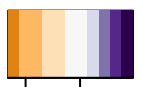

-50 0  
Value

2-0.0-10

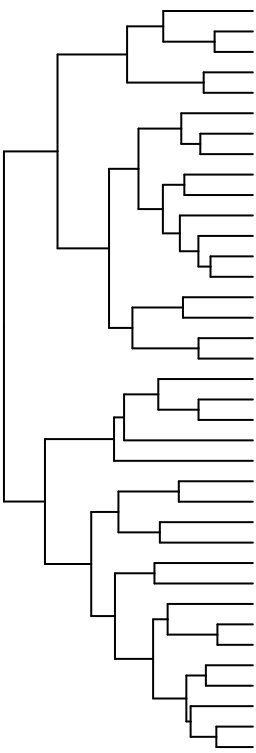

|    |     |     |    |     |     |    |    |    |    |    |    |    |     |     |     |
|----|-----|-----|----|-----|-----|----|----|----|----|----|----|----|-----|-----|-----|
| 4  | 1   | 1   | 2  | -19 | 21  | 49 | 29 | 8  | -2 | 2  | 4  | 28 | -10 | -3  | -20 |
| 1  | -2  | -4  | -3 | -27 | 29  | 31 | 27 | 0  | -1 | 1  | 1  | 10 | -14 | -17 | -13 |
| 3  | -11 | 0   | -1 | -32 | 25  | 32 | 25 | -1 | 0  | -1 | 1  | 18 | -15 | -16 | -7  |
| -4 | -14 | -3  | -1 | -51 | 42  | 47 | 44 | 0  | 0  | 0  | 0  | 16 | -16 | -18 | -17 |
| 3  | -28 | -4  | -2 | -44 | 34  | 47 | 47 | 2  | 0  | 0  | -1 | 16 | -14 | -19 | -16 |
| -4 | -27 | 6   | 6  | -35 | 28  | 28 | 37 | 3  | 9  | 3  | 4  | 23 | -11 | -9  | -13 |
| 6  | -32 | -3  | 1  | -25 | 30  | 35 | 31 | -2 | 7  | -1 | 1  | 10 | -8  | -14 | -14 |
| -2 | -24 | -2  | 1  | -24 | 26  | 26 | 26 | 4  | 1  | -1 | -3 | 10 | -4  | -9  | -7  |
| 15 | -35 | 0   | 3  | -25 | 6   | 38 | 11 | -1 | 7  | 0  | 3  | 21 | -12 | -15 | -5  |
| 3  | -36 | -4  | -2 | -17 | 7   | 26 | 10 | 2  | 1  | 0  | 1  | 21 | -15 | -16 | -12 |
| 0  | -26 | 1   | -1 | -34 | 4   | 38 | 32 | 1  | -1 | -2 | -1 | 16 | -10 | -18 | -13 |
| -2 | -36 | -3  | -4 | -41 | 7   | 34 | 29 | 1  | 1  | 1  | 1  | 16 | -4  | -6  | -3  |
| 7  | -44 | -2  | -4 | -26 | 0   | 29 | 34 | 1  | 1  | 1  | 2  | 13 | -4  | -3  | -6  |
| 2  | -36 | -2  | -5 | -28 | -2  | 32 | 30 | 1  | -1 | -2 | -1 | 12 | -5  | -15 | -11 |
| -1 | -33 | 1   | 1  | -10 | 22  | 40 | 34 | 0  | 4  | 1  | 3  | 20 | -13 | -21 | -15 |
| 0  | -40 | -5  | -3 | -60 | 18  | 44 | 40 | 0  | 3  | 3  | 1  | 22 | -15 | -16 | -13 |
| -4 | -35 | 1   | 2  | -45 | 16  | 7  | 36 | 7  | -1 | -3 | -2 | 23 | -13 | -4  | -9  |
| -1 | -31 | -10 | -5 | -40 | 4   | 8  | 28 | 5  | 3  | 2  | 1  | 26 | -10 | -5  | -11 |
| 15 | -9  | -1  | 3  | -14 | 0   | 29 | 15 | -1 | 10 | 0  | 1  | 11 | -5  | -11 | -2  |
| 1  | -24 | 1   | 3  | -18 | -5  | 22 | 19 | -1 | 1  | 0  | 1  | 9  | -1  | -10 | 1   |
| 2  | -26 | 1   | 3  | -22 | -14 | 8  | 22 | -1 | 4  | -1 | 0  | 9  | -1  | -4  | -8  |
| -4 | -8  | -8  | -5 | -29 | -5  | 0  | 15 | 3  | -1 | 2  | 0  | 32 | -13 | -16 | -19 |
| 9  | -16 | -3  | 0  | -21 | -44 | 25 | 24 | -2 | 3  | 0  | 1  | 15 | 0   | -21 | -18 |
| 2  | -42 | -8  | 4  | -34 | -31 | 31 | 27 | 2  | 8  | 7  | 1  | 19 | 3   | -6  | -9  |
| -1 | -66 | 1   | 5  | -43 | -31 | 37 | 32 | 4  | 9  | 3  | 0  | 24 | 0   | -7  | -5  |
| -6 | -29 | -4  | -3 | -48 | -20 | 15 | 22 | 6  | 6  | 3  | 3  | 31 | -9  | -16 | -16 |
| 2  | -41 | 0   | 1  | -61 | -24 | 3  | 9  | 2  | 10 | 4  | 3  | 38 | -10 | -14 | -18 |
| 0  | -42 | 0   | 3  | -42 | 1   | 42 | 1  | 9  | 6  | 1  | -2 | 15 | -3  | -7  | 4   |
| -6 | -34 | 7   | 8  | -34 | -27 | 37 | -4 | -5 | 7  | 4  | 4  | 11 | 2   | -14 | -1  |
| 3  | -60 | -3  | -2 | -58 | -16 | 9  | 4  | 3  | 4  | 1  | 3  | 22 | -3  | -5  | -3  |
| 1  | -61 | -1  | 0  | -29 | -13 | 29 | 21 | 2  | 1  | -2 | -2 | 13 | -6  | -12 | -7  |
| 3  | -34 | -3  | -4 | -26 | -20 | 26 | 23 | -1 | 4  | 0  | 1  | 11 | -3  | -14 | -8  |
| 0  | -30 | 1   | -7 | -30 | 9   | 30 | 9  | 2  | 3  | -2 | 2  | 15 | -9  | -18 | -5  |
| 1  | -63 | 0   | -5 | -34 | -1  | 26 | 20 | 0  | 3  | 2  | 3  | 13 | -8  | -12 | -8  |
| 1  | -15 | 3   | 1  | -26 | -6  | 26 | 7  | 1  | 7  | 0  | 1  | 13 | -5  | -9  | -4  |
| -4 | -49 | 3   | 1  | -25 | -1  | 26 | 19 | 1  | 1  | -1 | 0  | 11 | -8  | -13 | -8  |
| -3 | -49 | 1   | 0  | -25 | 6   | 22 | 21 | 3  | -1 | -1 | -3 | 15 | -10 | -13 | -9  |

- SAC3
- GYP1
- PFK26
- COG6
- FPR1
- LEU4
- PBI2
- YNL321W
- YNL143C
- IRS4
- URK1
- YNR018W
- SET3
- CPS1
- AVT4
- PPG1
- BNA4
- SAL1
- YIR003W
- RAS2
- ZSP1
- YJL175W
- SRO77
- YNL115C
- YAF9
- BIT2
- YNL105W
- PEX32
- YBL104C\_1
- YBR100W\_1
- YIL166C
- YIL167W
- MSL1
- SMM1
- NTH2
- YIR007W
- YBR071W

Gene Name

- YPD.K.Shift
- HLK.INTERACTION
- CSH.K.INTERACTION
- HLAS.K.INTERACTION
- YPG.K.Shift
- HLEG.K.INTERACTION
- CSHEG.K.INTERACTION
- HLEG.AS.K.INTERACTION
- YPD.L.Shift
- HLL.INTERACTION
- CSH.L.INTERACTION
- HLAS.L.INTERACTION
- YPG.L.Shift
- HLEG.L.INTERACTION
- CSHEG.L.INTERACTION
- HLEG.AS.L.INTERACTION

Type of Media



Color Key

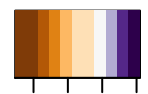

-100 0  
Value

2-0.0-3

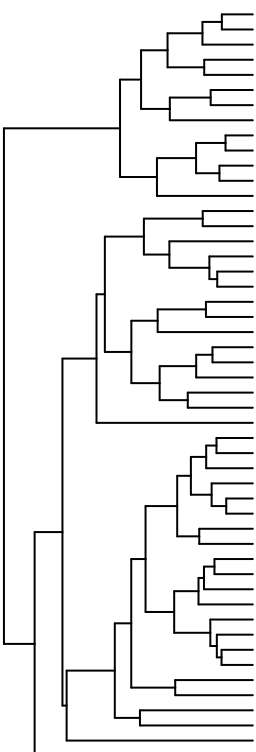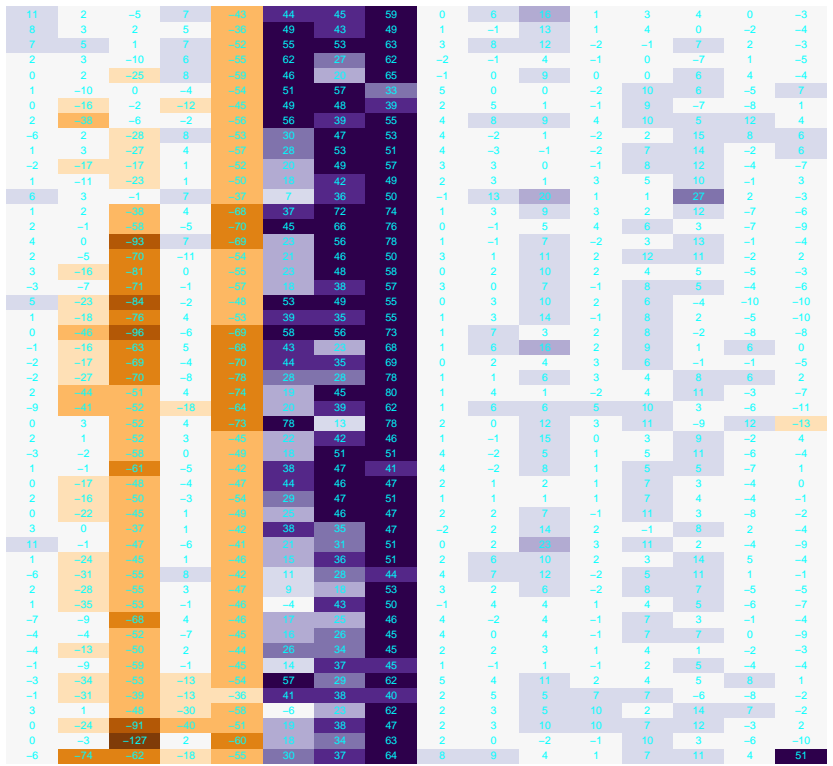

CTT1  
ROM1  
SIA1  
DPH5  
HUA2  
YMR210W  
YMR196W  
UBP3  
LEO1  
KIN4  
CLB1  
YOR246C  
LOT5  
FSH3  
YKL161C  
CAP1  
VAM3  
AZF1  
YGR079W  
RAS1  
TPO5  
DBR1  
YOR283W  
MSC3  
SSP2  
PIR3  
SCM4  
BAG7  
YOR263C  
ELF1  
WTM2  
YKL023W  
RAD27  
YGR107W  
HNT3  
APL2  
YOR285W  
COY1  
YOR105W  
TPC1  
UPD4  
MCA1  
RPS27A  
PEX8  
YKL027W  
YOR251C  
FMP31  
WSP1  
AVT3  
RPL11B

Gene Name

YPD\_K.Shift  
HLL\_K.INTERACTION  
CSH\_K.INTERACTION  
HLL\_AS\_K.INTERACTION  
YPEG\_K.Shift  
HLEG\_K.INTERACTION  
CSHEG\_K.INTERACTION  
HLEG\_AS\_K.INTERACTION  
YPD\_LL.Shift  
HLL.INTERACTION  
CSH\_LL.INTERACTION  
HLL\_AS\_LL.INTERACTION  
YPEG\_LL.Shift  
HLEG\_LL.INTERACTION  
CSHEG\_LL.INTERACTION  
HLEG\_AS\_LL.INTERACTION

Type of Media

Color Key

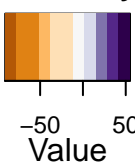

2-0.0-4

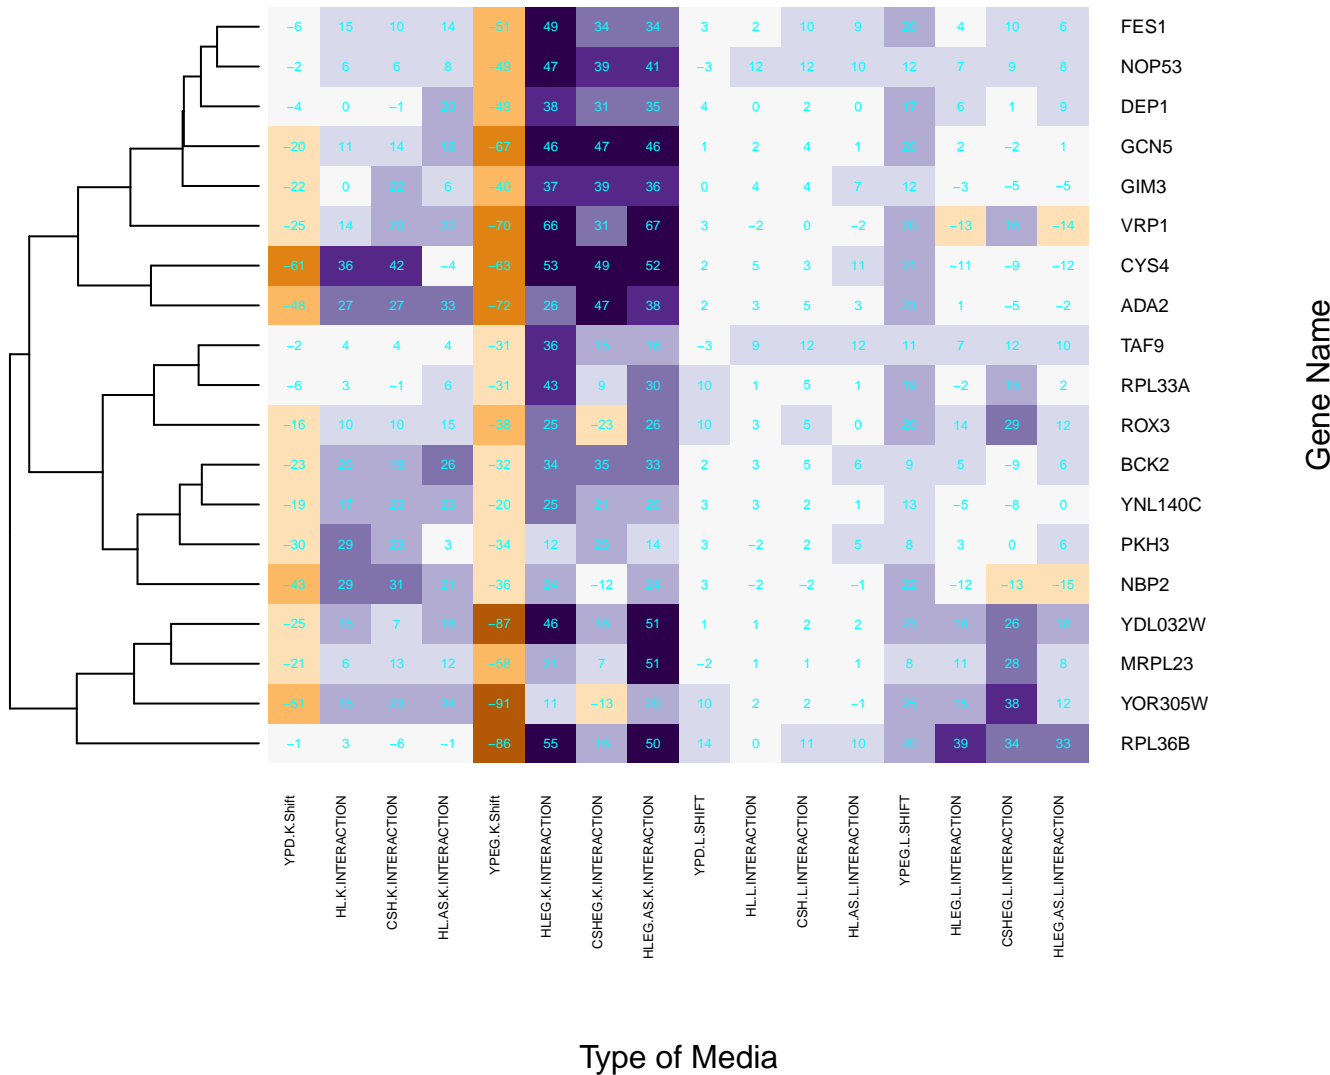

Color Key

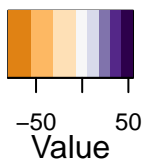

2-0.0-5

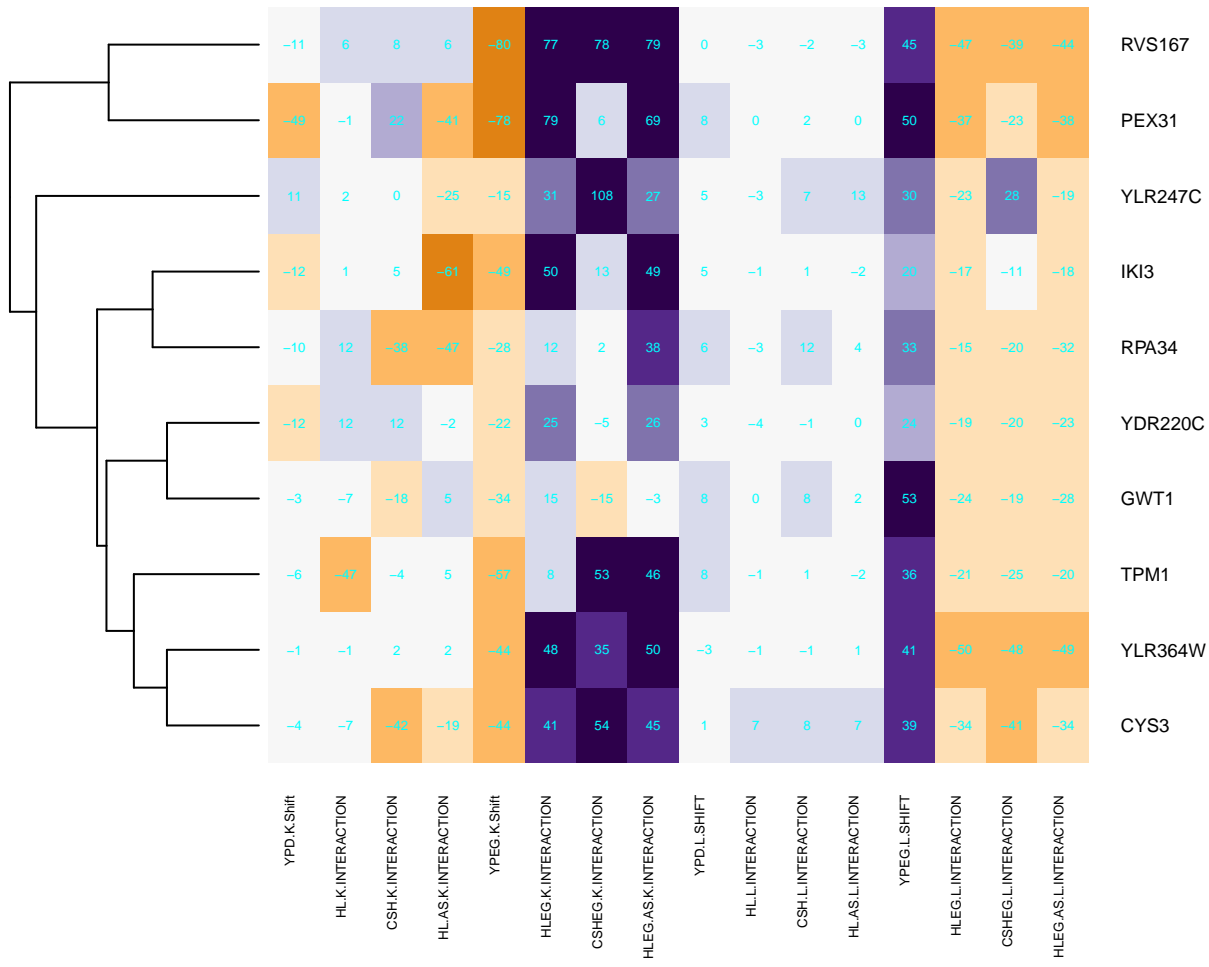

Gene Name

Type of Media

Color Key

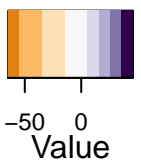

2-0.0-6

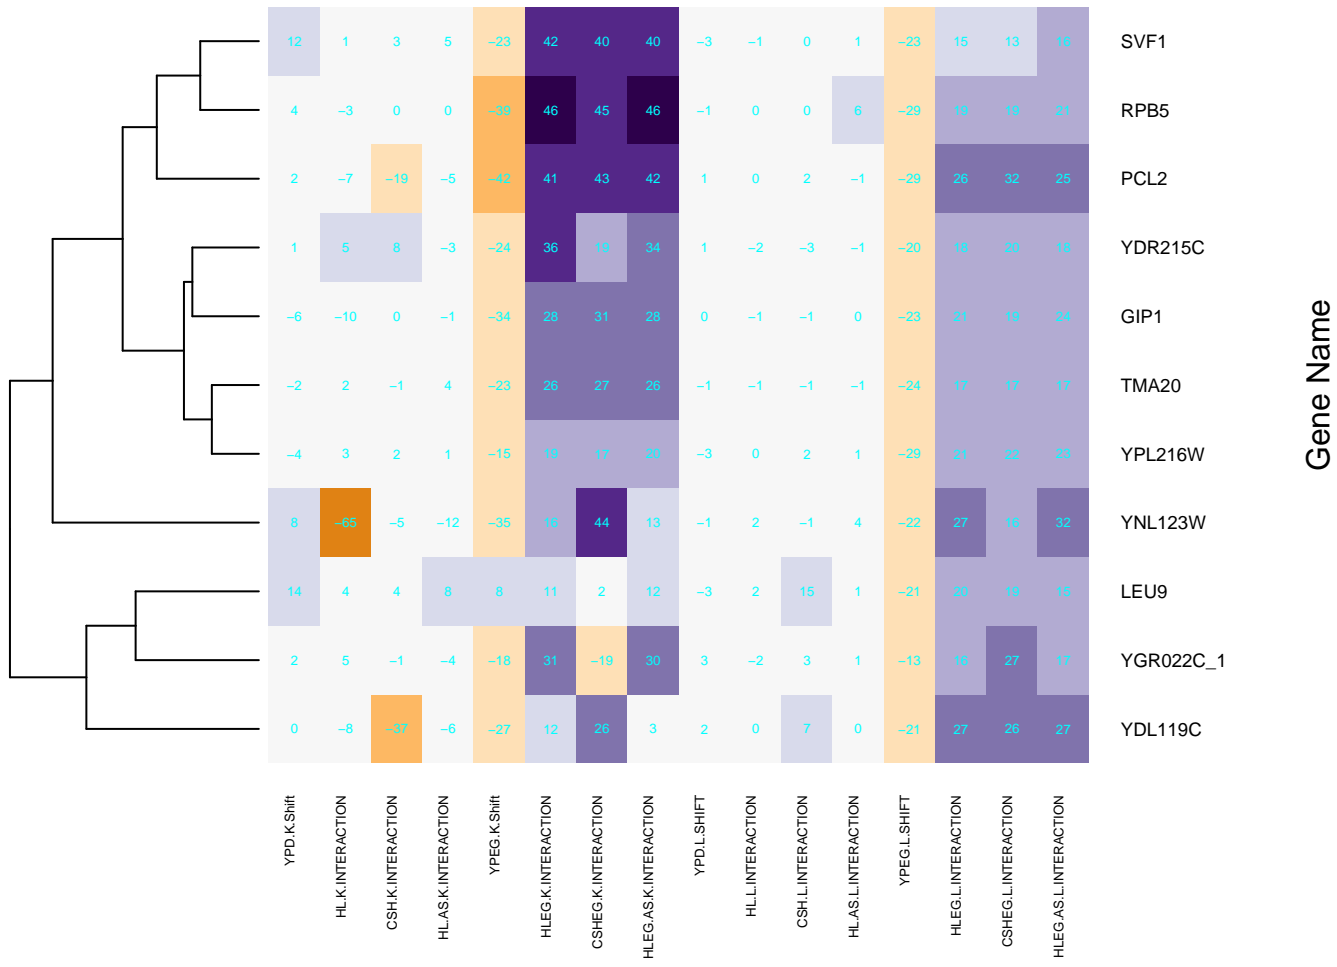

Color Key

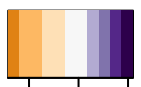

-50 0 50  
Value

2-0.0-7

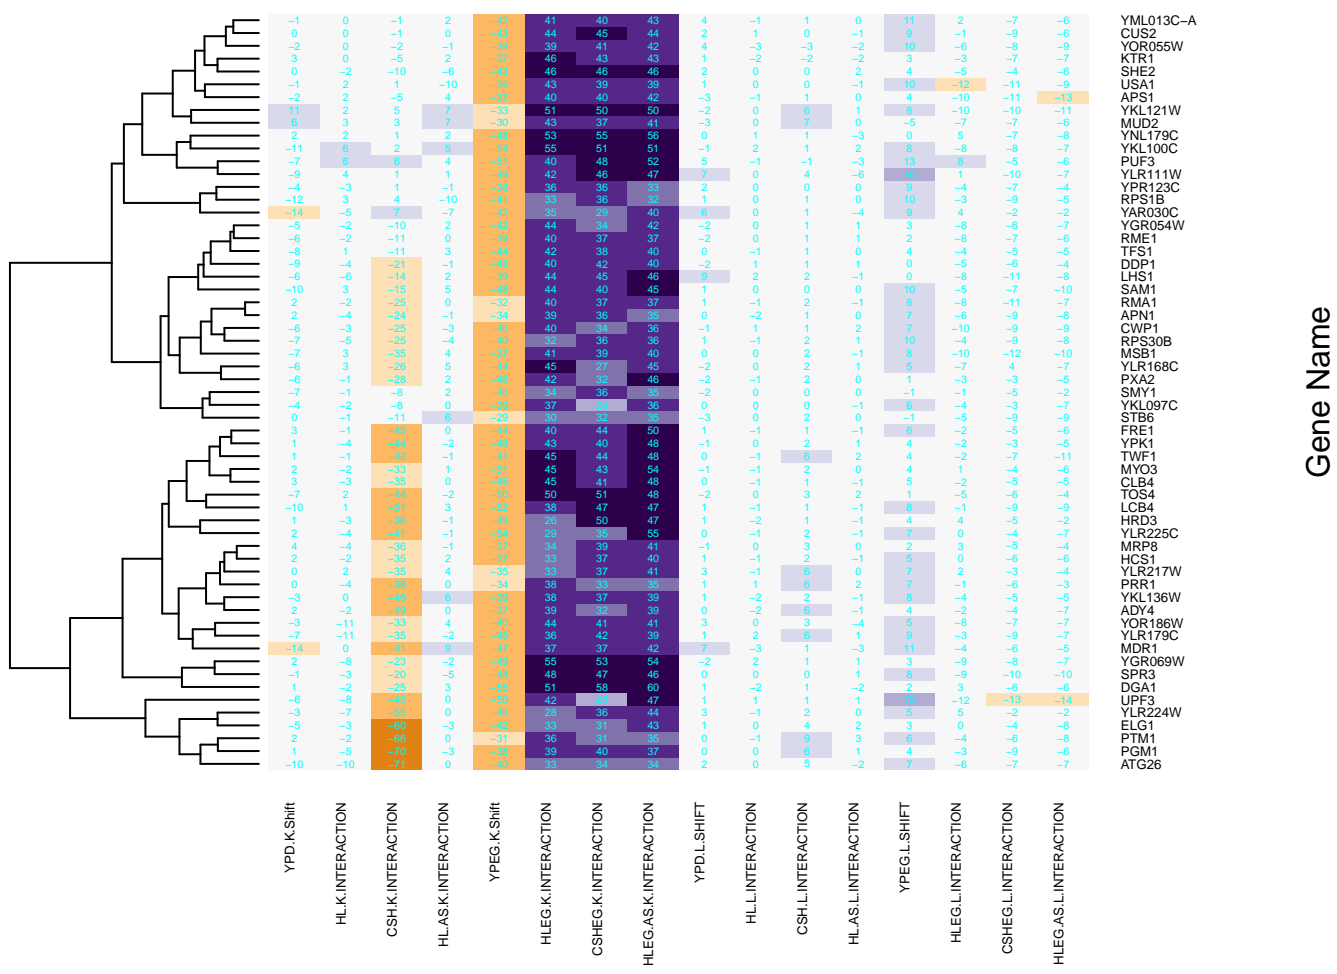

Type of Media

Gene Name

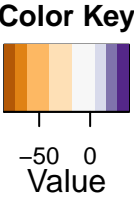

2-0.0-8

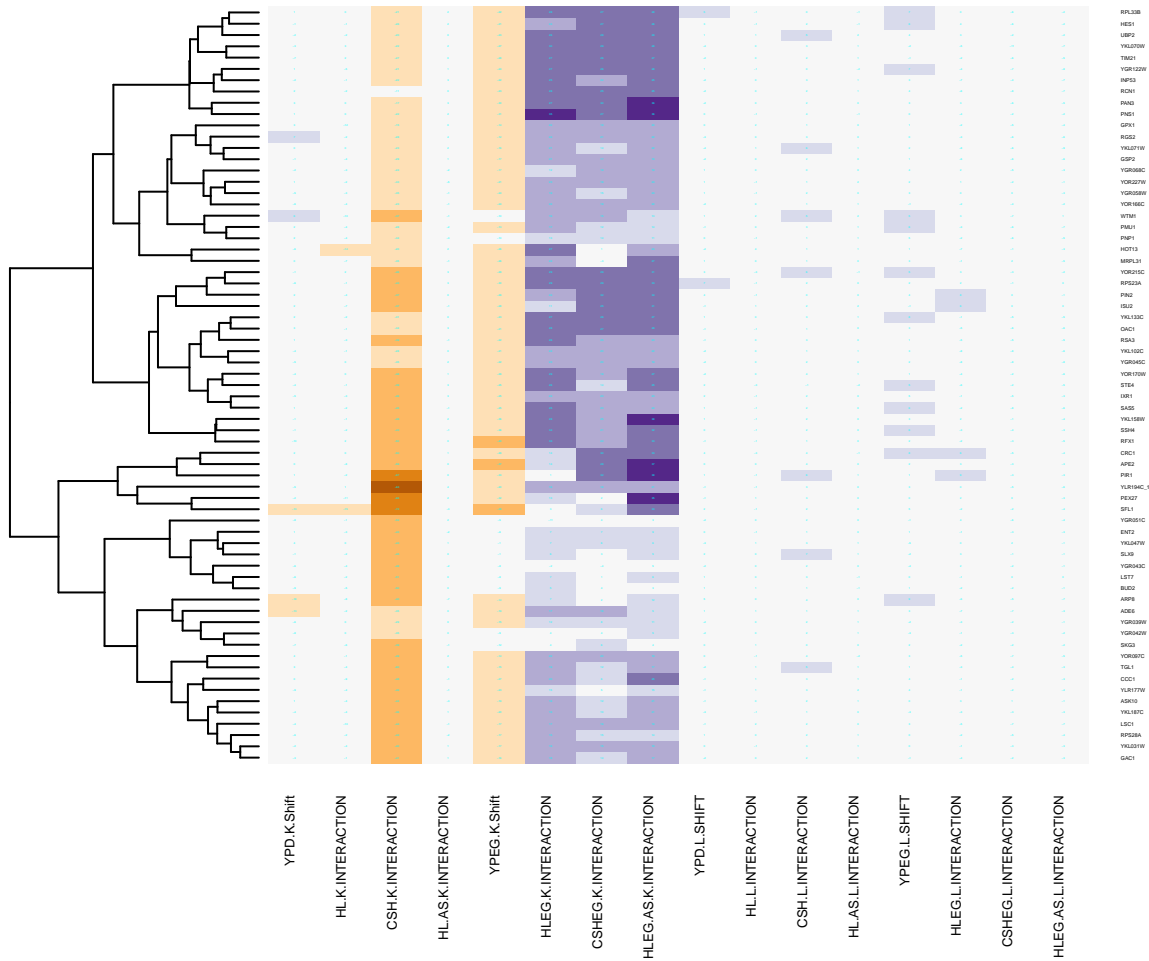

Gene Name

Type of Media

Color Key

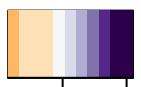

0 50  
Value

2-0.0-9

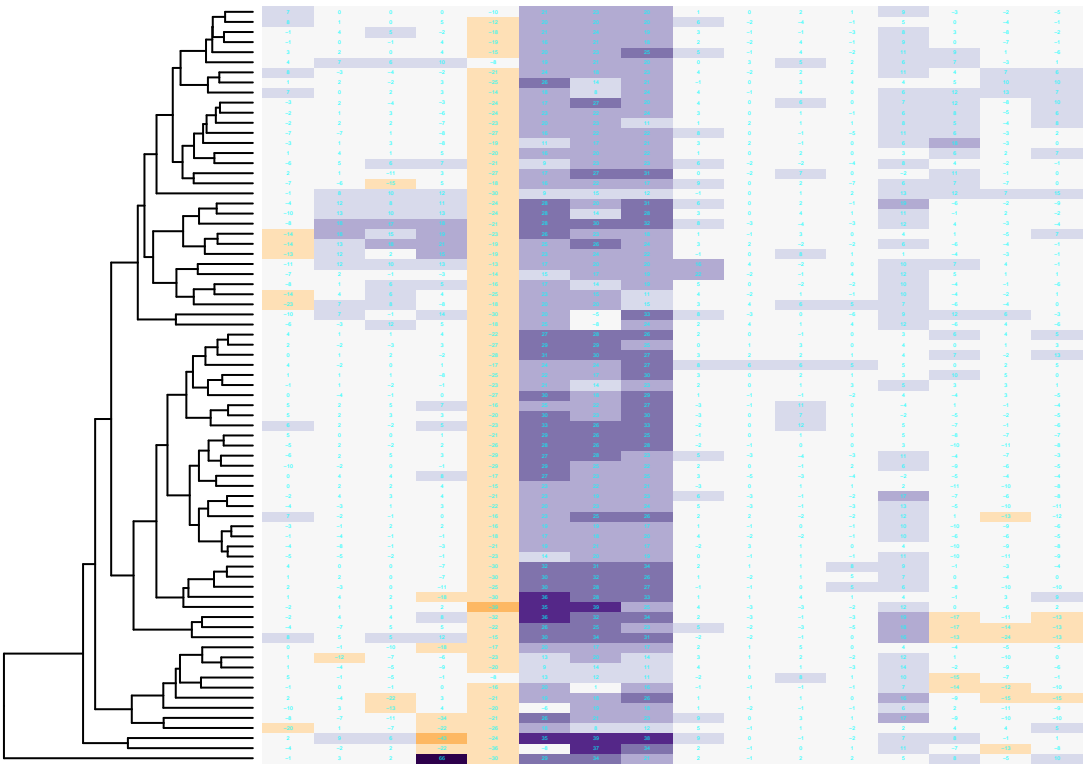

- SGO1
- YFR012W-A\_1
- PLB2
- YMR209C
- CTF13
- TSR4
- YJL029W
- YGL024W
- YKL106C-A\_1
- REX3
- YLR104W
- STB1
- CSF1
- YLR108C
- YNL153W
- GIS4
- YOR277C
- RPL36A
- COX16
- PRF46
- VAM6
- EMW1
- SRV2
- MFA1
- PUS4
- HAS1
- YMR242W-A\_1
- KRE1
- YMR166C
- MNN10
- SCJ1
- YDR514C
- YDR322C-A\_1
- YGL101W
- PEX12
- YKL060C-B\_1
- YJL029W
- PMC1
- MM52
- YKL105C
- CUE2
- ACB1
- YBL083C
- YOR152C
- PKY2
- PEX13
- MSN4
- SBH1
- SEC21
- YOR052C
- DSL1
- UBC11
- HRP2
- MET31
- YOR020W\_1
- YJR150W-A\_1
- YMR203C
- YPR116W
- YMR544W
- RPL18B
- PHO81
- APM1
- GEP1
- SIR42
- PSP2
- SWO1
- WPS5
- HRB1
- NFU1
- YLR198C
- RPL14A
- YLR021W
- FYV7
- SVF26
- FUS2

Gene Name

Type of Media

Color Key

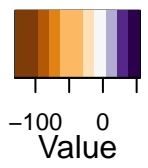

2-0.1-0

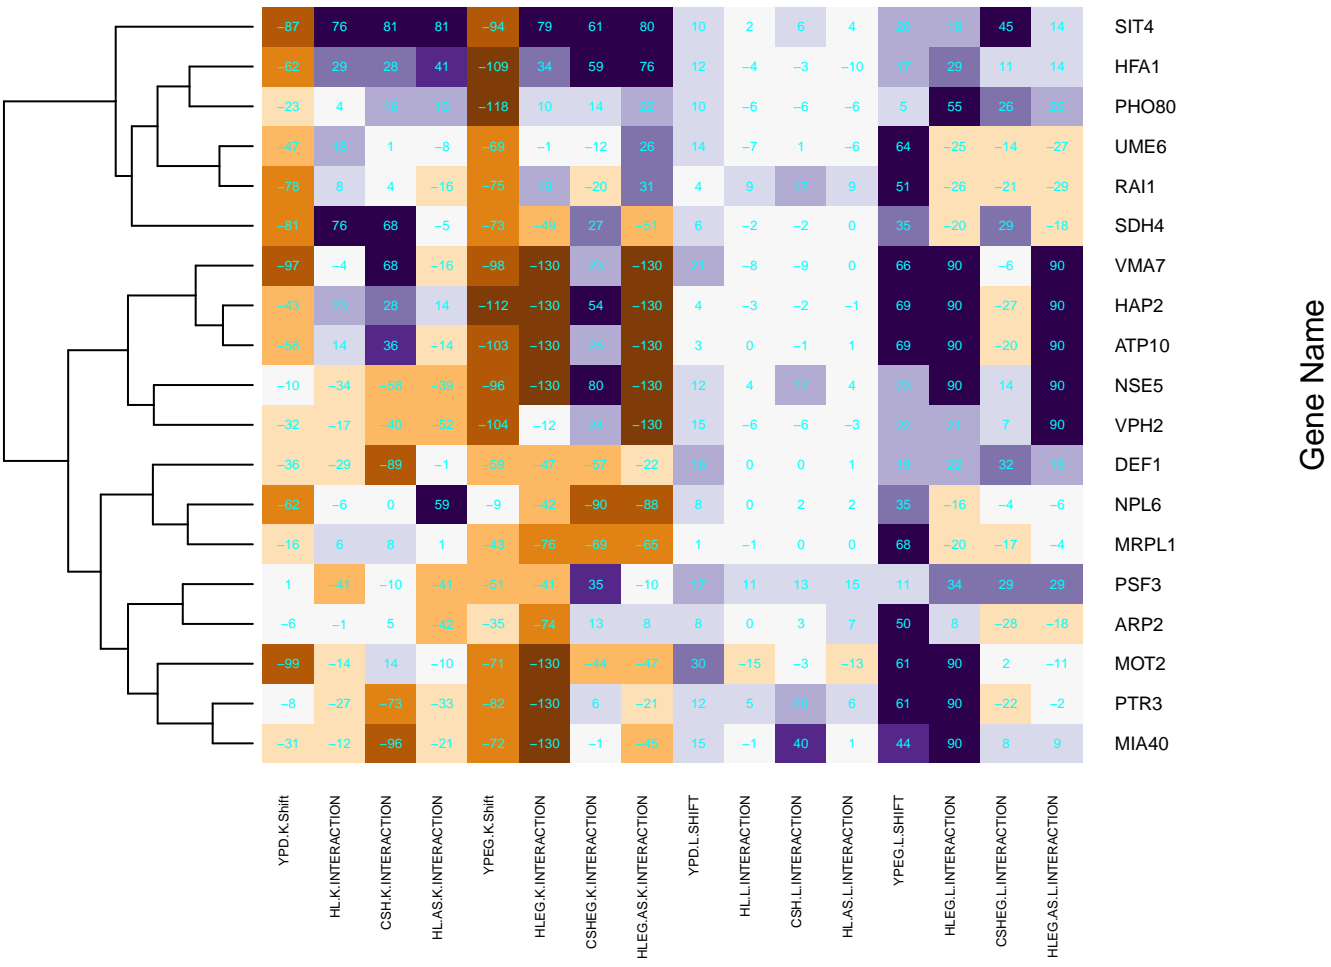

Type of Media

# 2-0.1-1

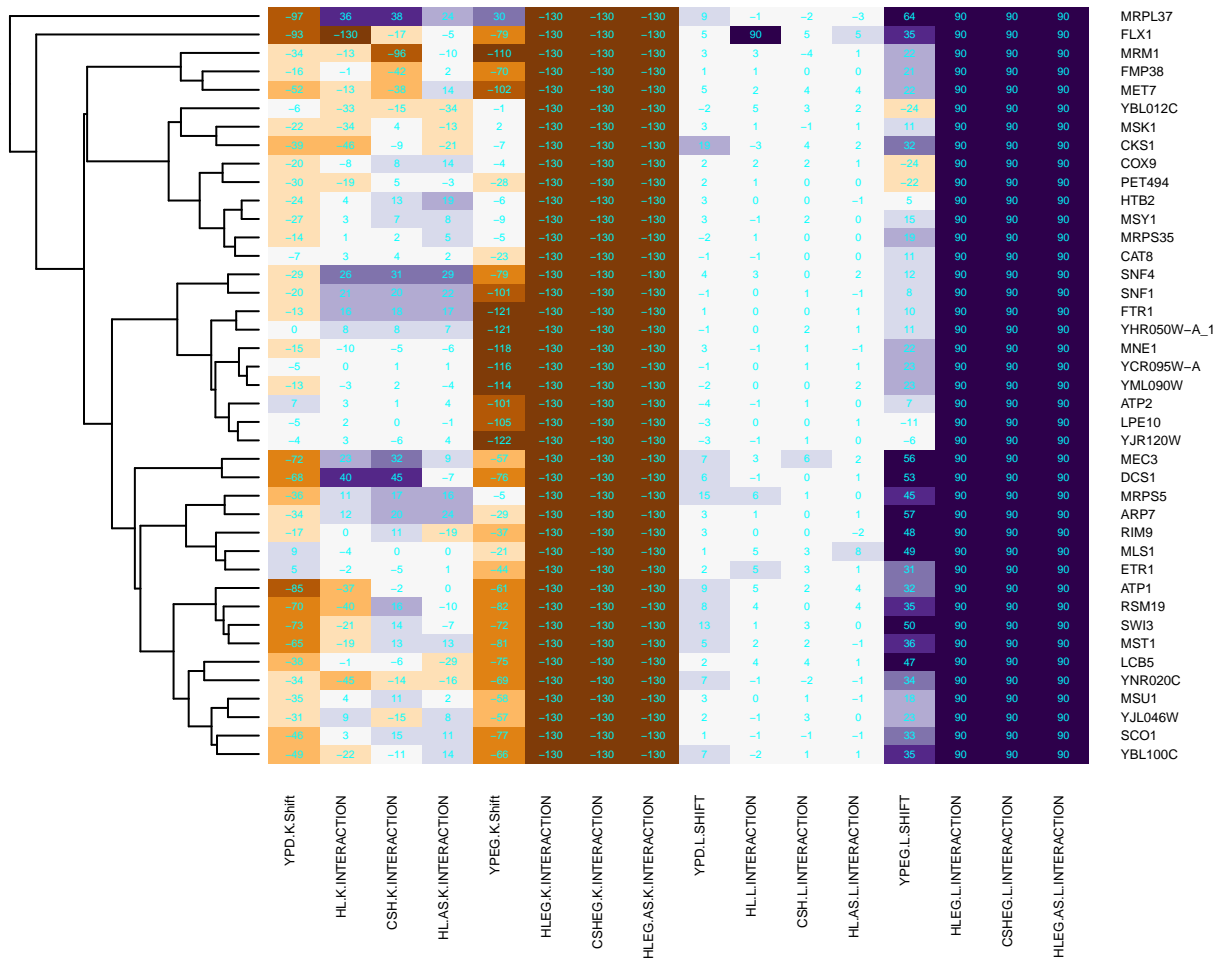

Gene Name

## Type of Media

Color Key

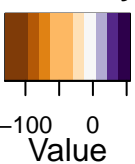

2-0.1-2

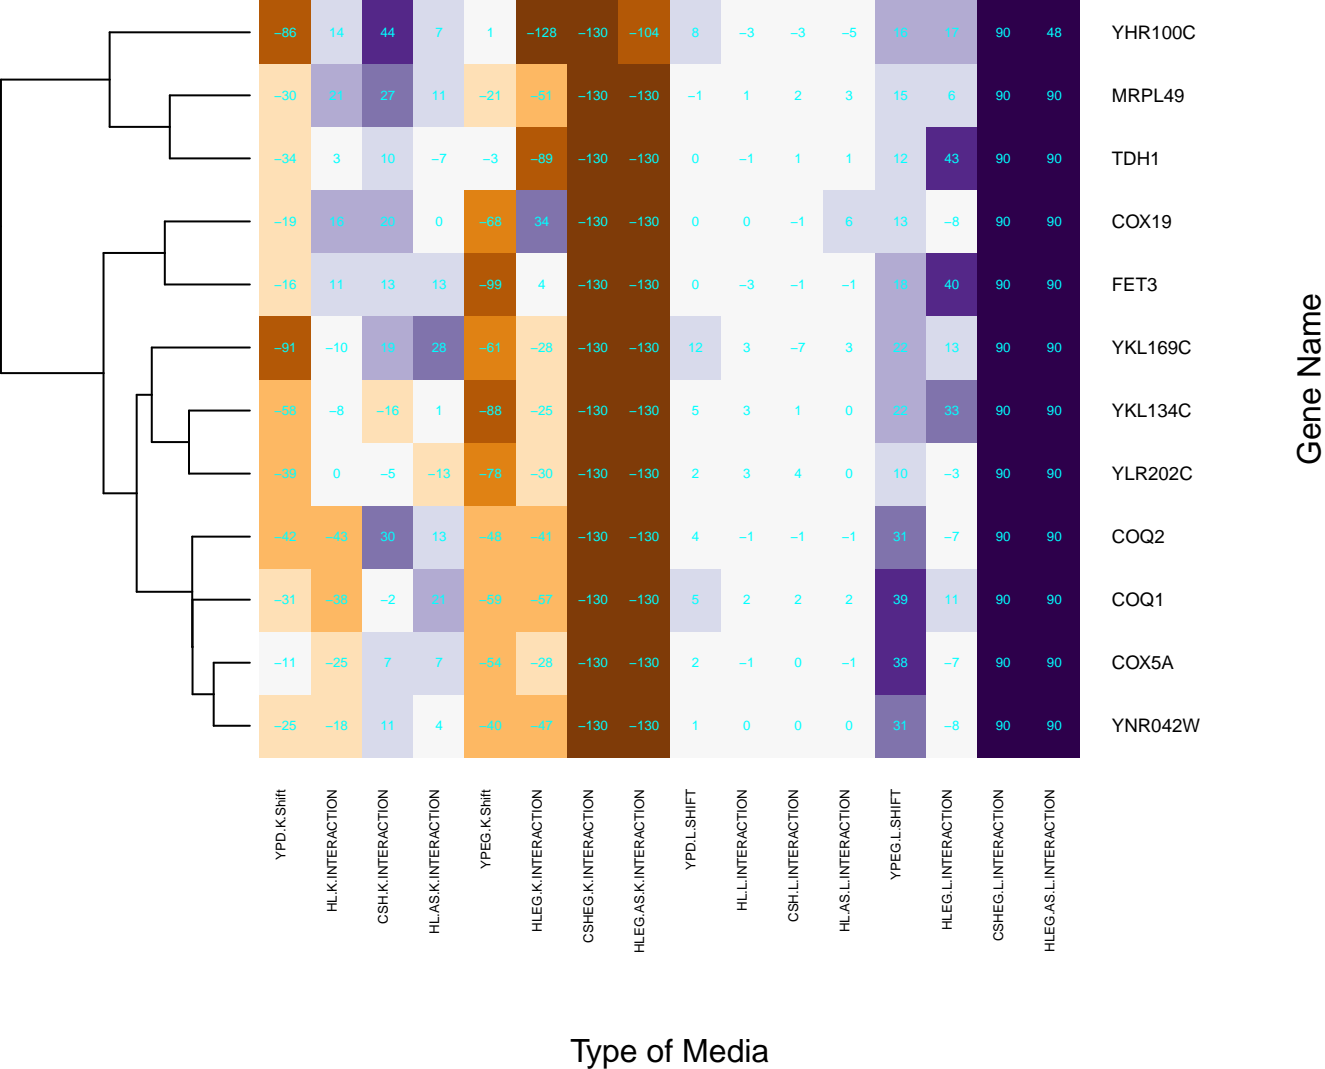

Color Key

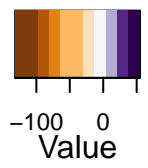

2-0.1-3

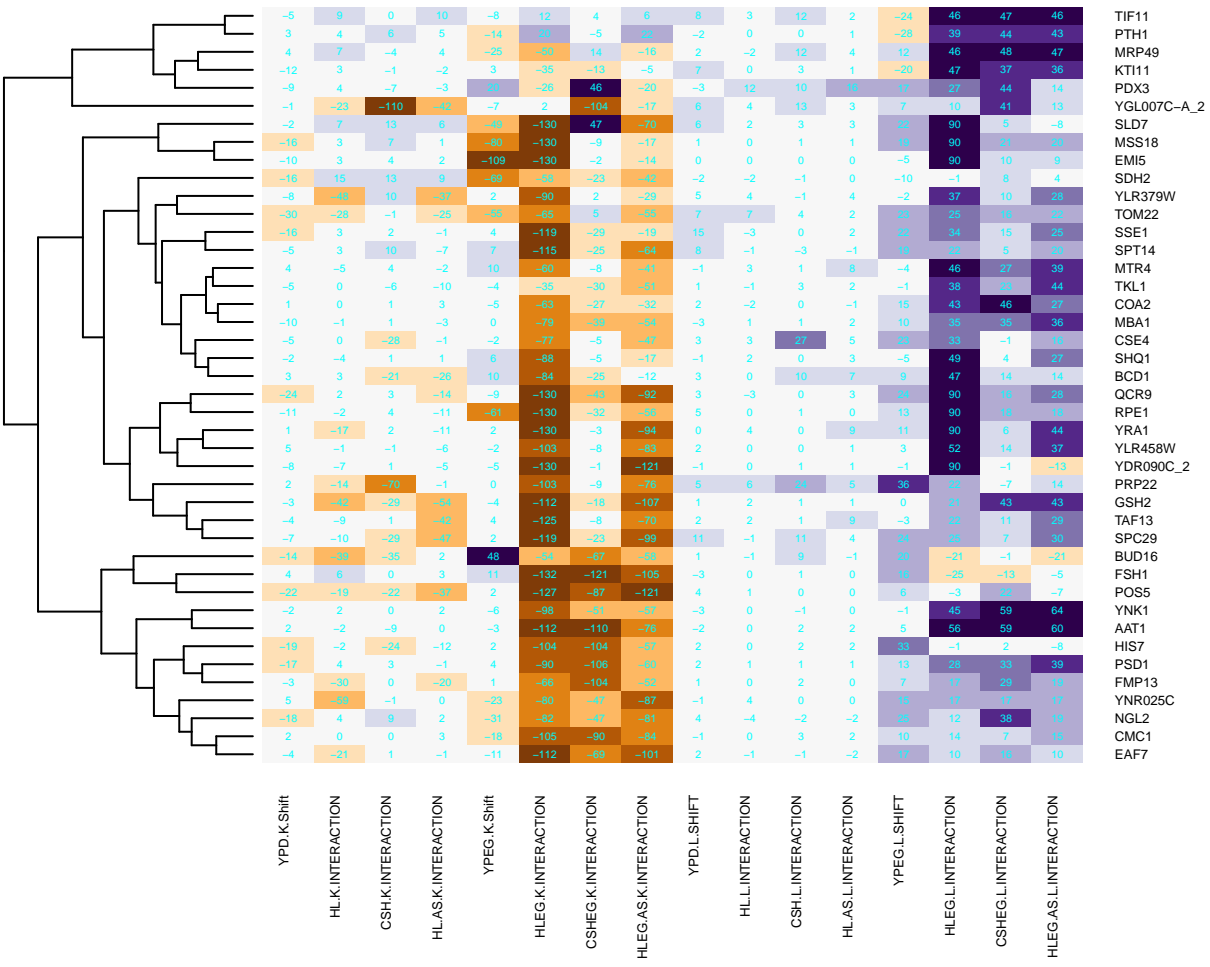

Gene Name

Type of Media

# Color Key

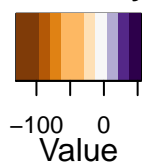

2-0.1-4

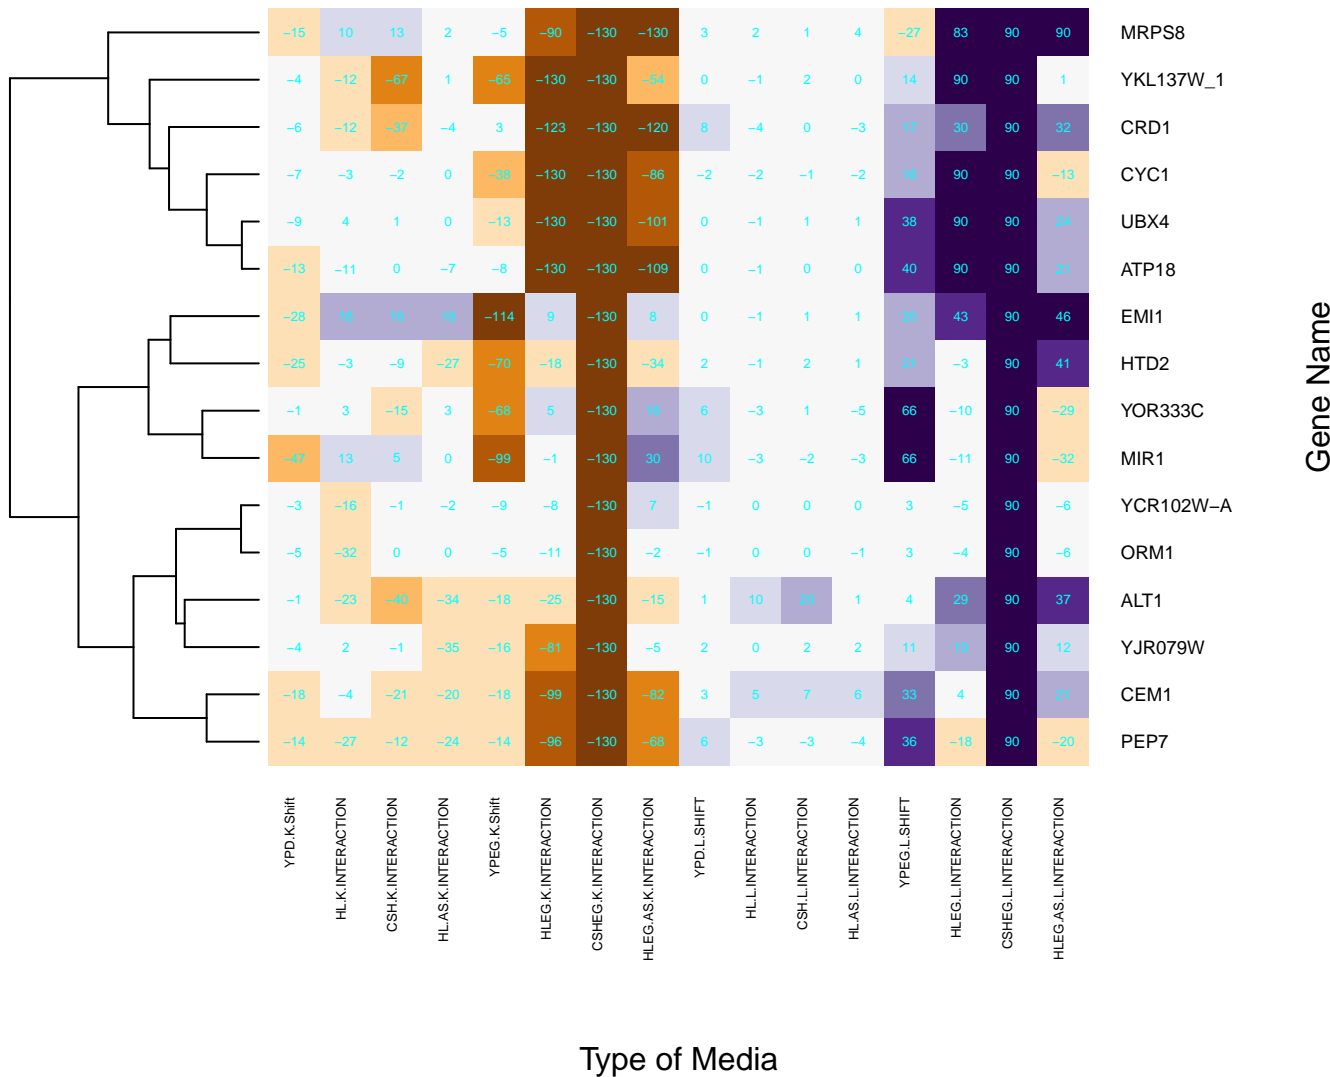

Color Key

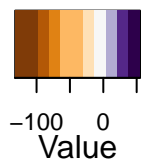

2-0.1-5

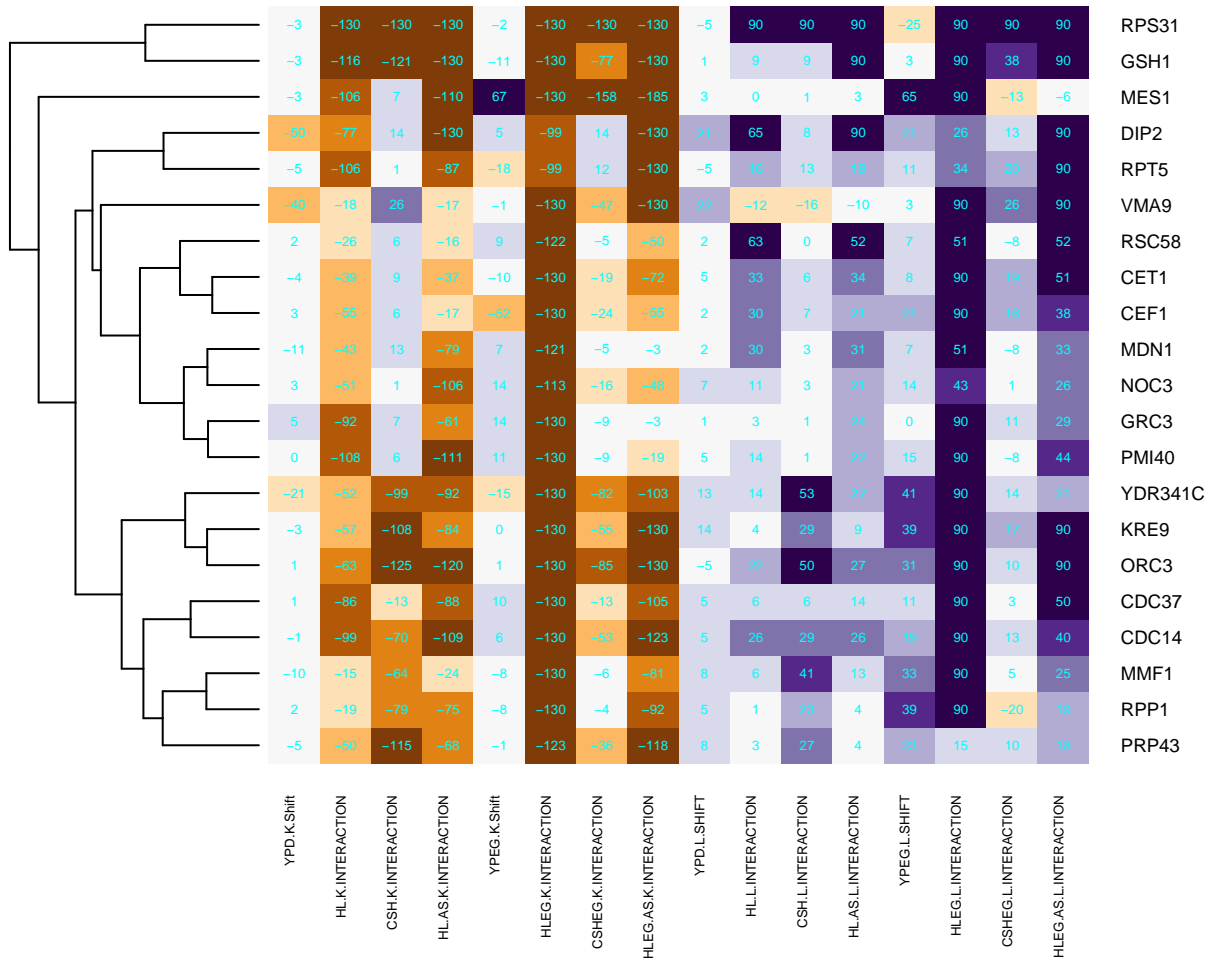

Gene Name

Type of Media

Color Key

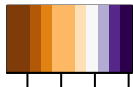

-100 0  
Value

2-0.1-6

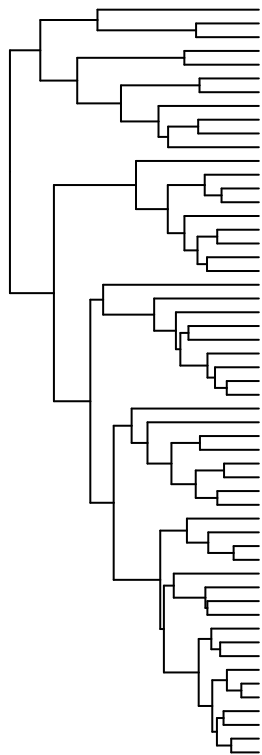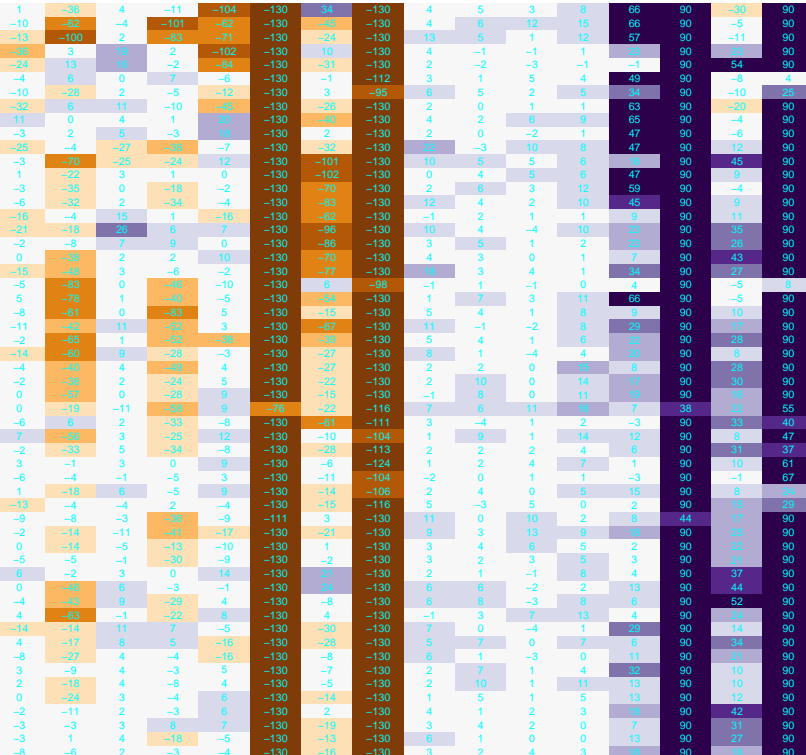

EPL1  
RPF5  
TEL2  
YPL183W-A  
FBP1  
MNP1  
YRB2  
QCR8  
PSA1  
KE1  
MCD1  
SSL1  
YHL005C  
VTI1  
RRN6  
YLR230W  
PRP2  
PET3  
NAT2  
TFA2  
CSG2  
VAS1  
RBA50  
RRP43  
RPM2  
RPN3  
TIM22  
NOP14  
TRS120  
CDC19  
YJL120W  
PHS1  
ORC1  
TSR1  
YDR090C\_1  
UTP22  
SEC31  
ESA1  
YML6  
ILV5  
DBP9  
CBF5  
DBP6  
TBF1  
CDC11  
RSC3  
FOL3  
STT4  
PRP21  
ECO1  
YIL171W  
CDC28  
RSC13  
YNL260C  
ROK1

Gene Name

Type of Media

Color Key



2-0.2-0

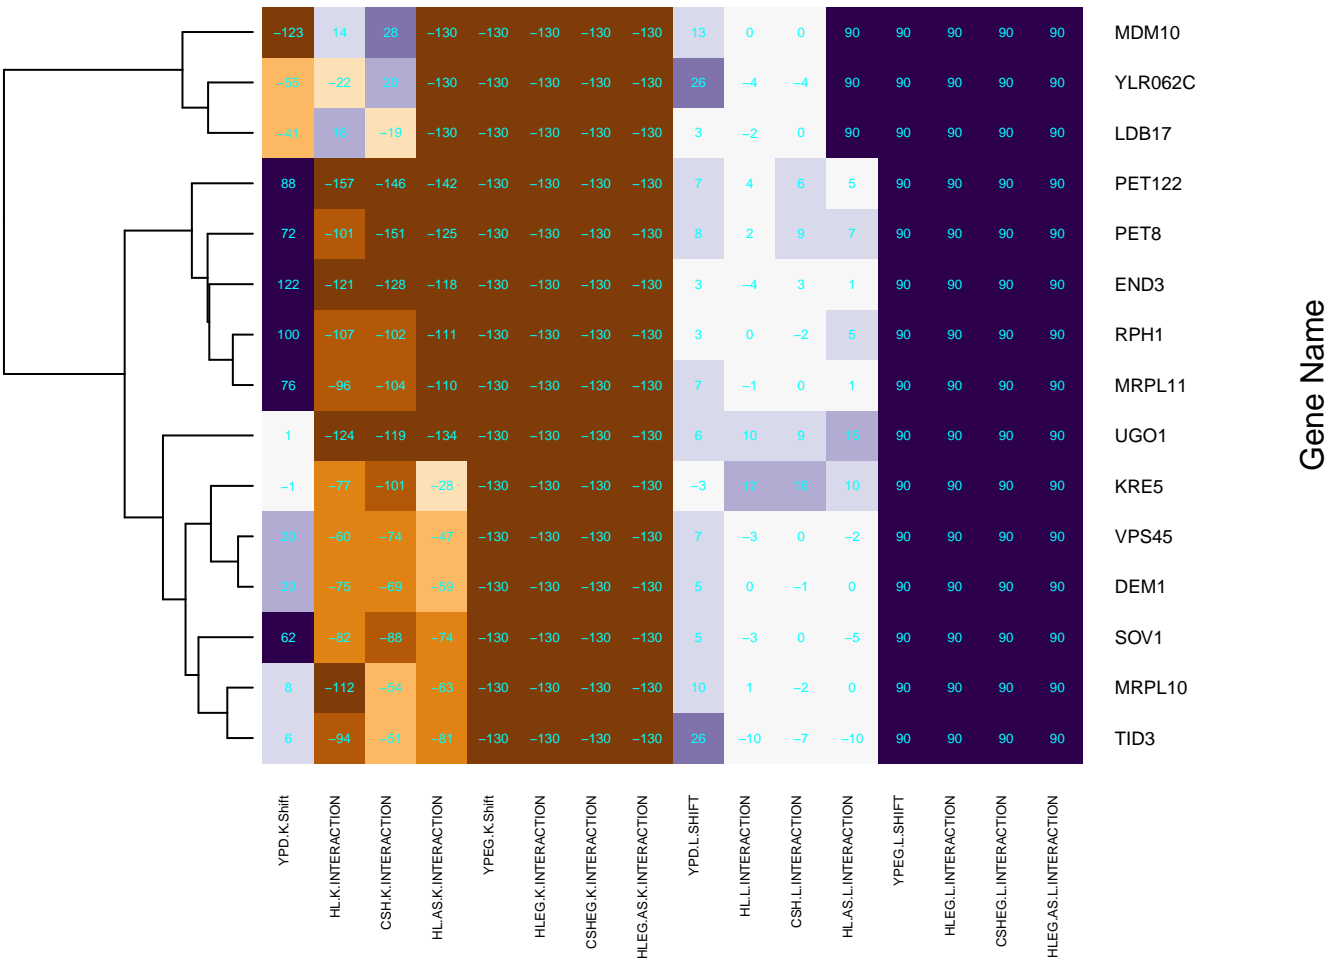

Type of Media

Color Key



2-0.2-1

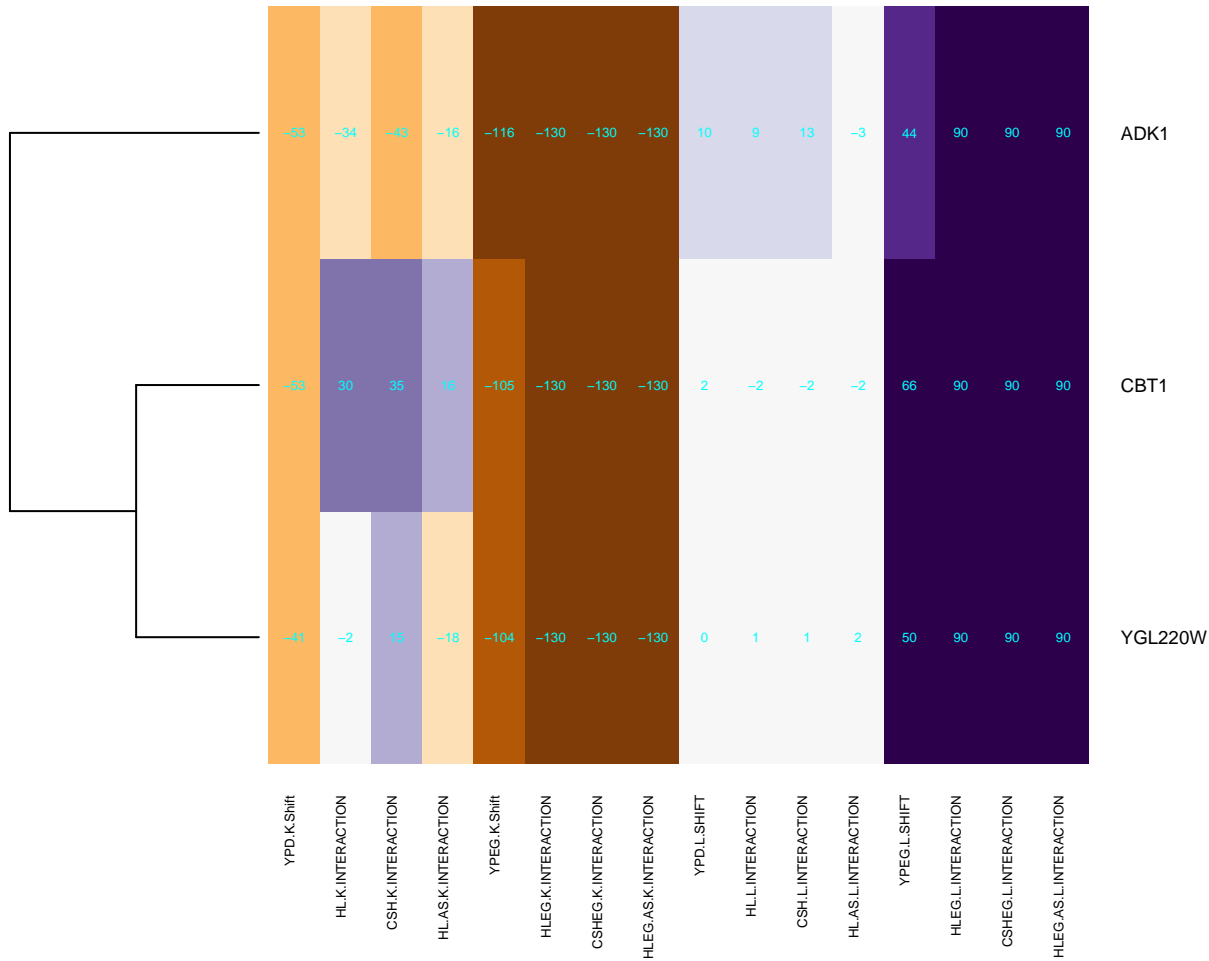

Color Key



2-0.2-2

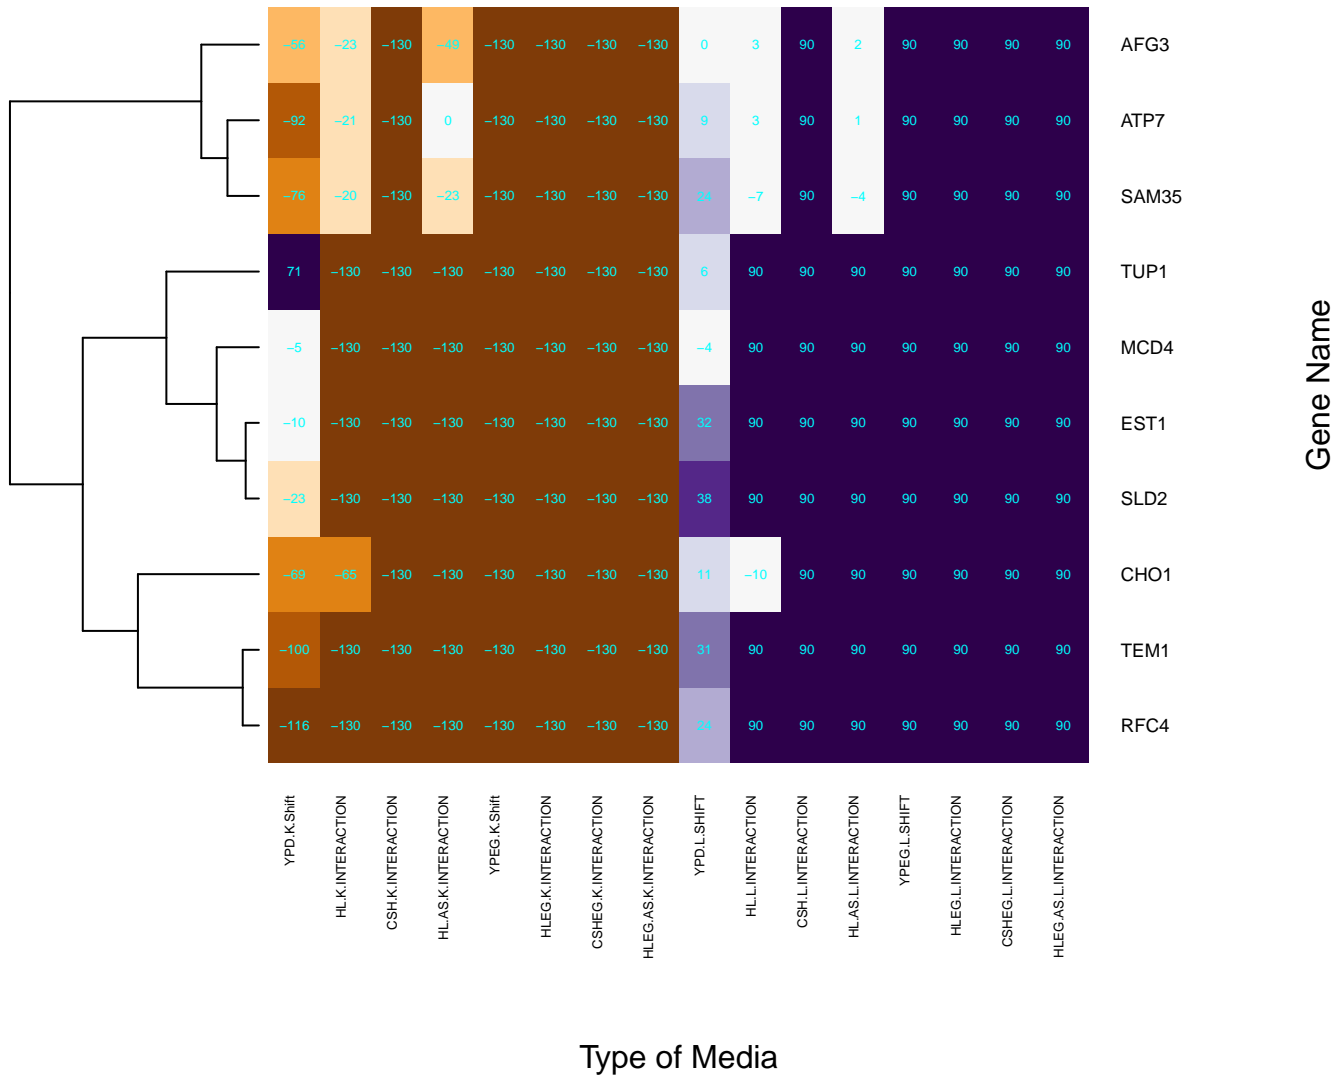

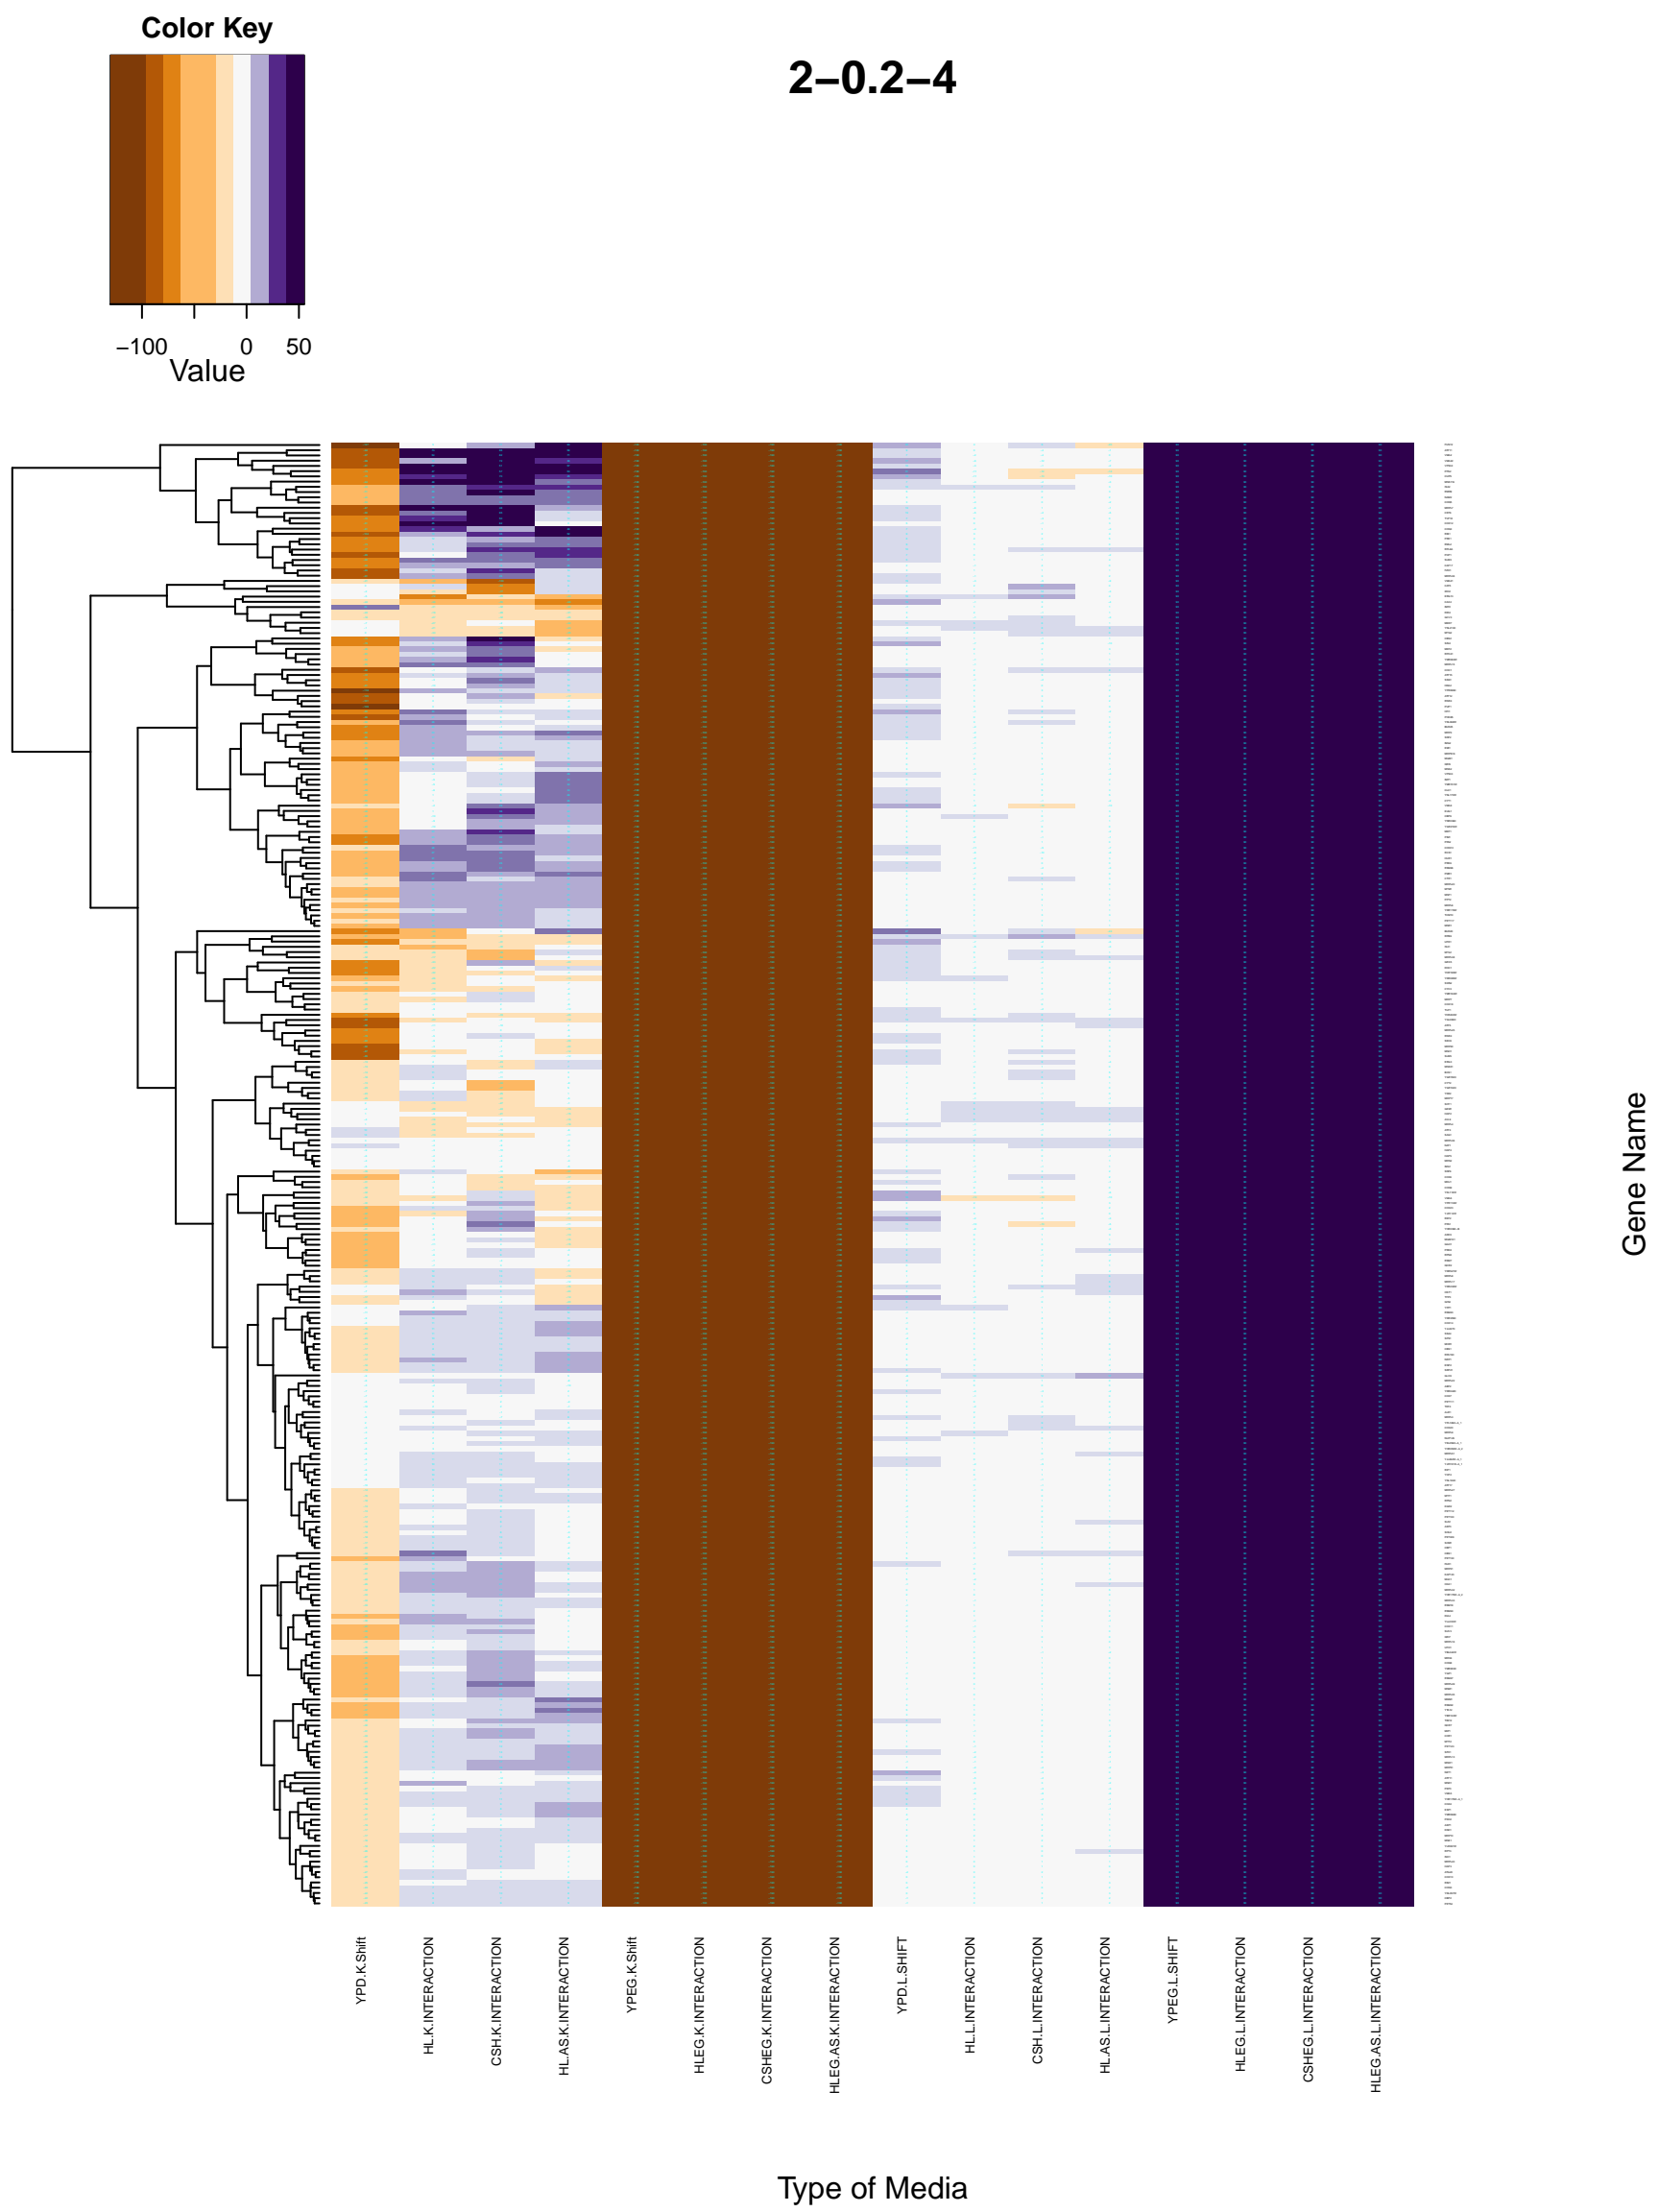

Color Key

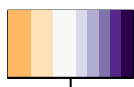

0  
Value

2-0.3-0

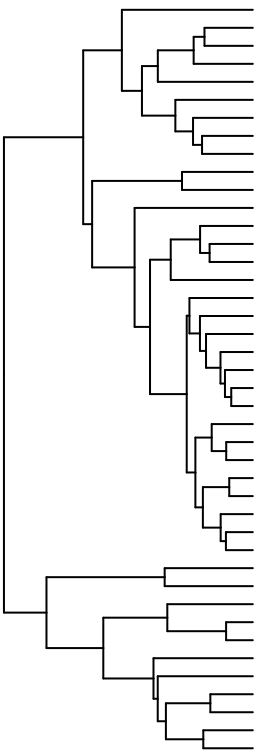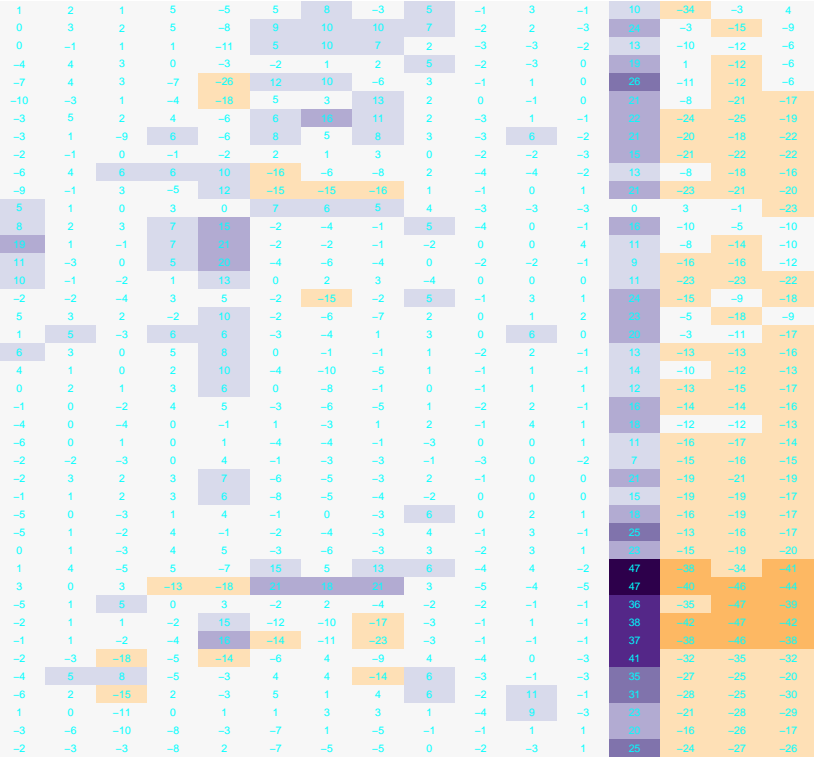

- RRT8
- TOP1
- YIL165C
- TAF7
- RVS161
- NKP2
- PHO86
- SIS1
- PHO2
- YDR134C
- BUL1
- YER087C-B\_1
- PRP42
- YJL195C
- YBR235W
- ATX1
- STH1
- SEC3
- BRL1
- DOP1
- PCM1
- URB1
- POP6
- GLN4
- YBR187W
- RAV2
- YEL033W
- YPS7
- WBP1
- SNM1
- PNO1
- GCD2
- RHO4
- YDR269C
- CCC2
- YDR271C
- GCS1
- BTT1
- FBA1
- UTP5
- RAV1
- SOD1

Gene Name

- YPD.K.Shift
- HLK.INTERACTION
- CSH.K.INTERACTION
- HLAS.K.INTERACTION
- YPGE.K.Shift
- HLGE.K.INTERACTION
- CSHEG.K.INTERACTION
- HLGAS.K.INTERACTION
- YPD.L.Shift
- HLL.INTERACTION
- CSH.L.INTERACTION
- HLAS.L.INTERACTION
- YPGE.L.Shift
- HLGE.L.INTERACTION
- CSHEG.L.INTERACTION
- HLGAS.L.INTERACTION

Type of Media

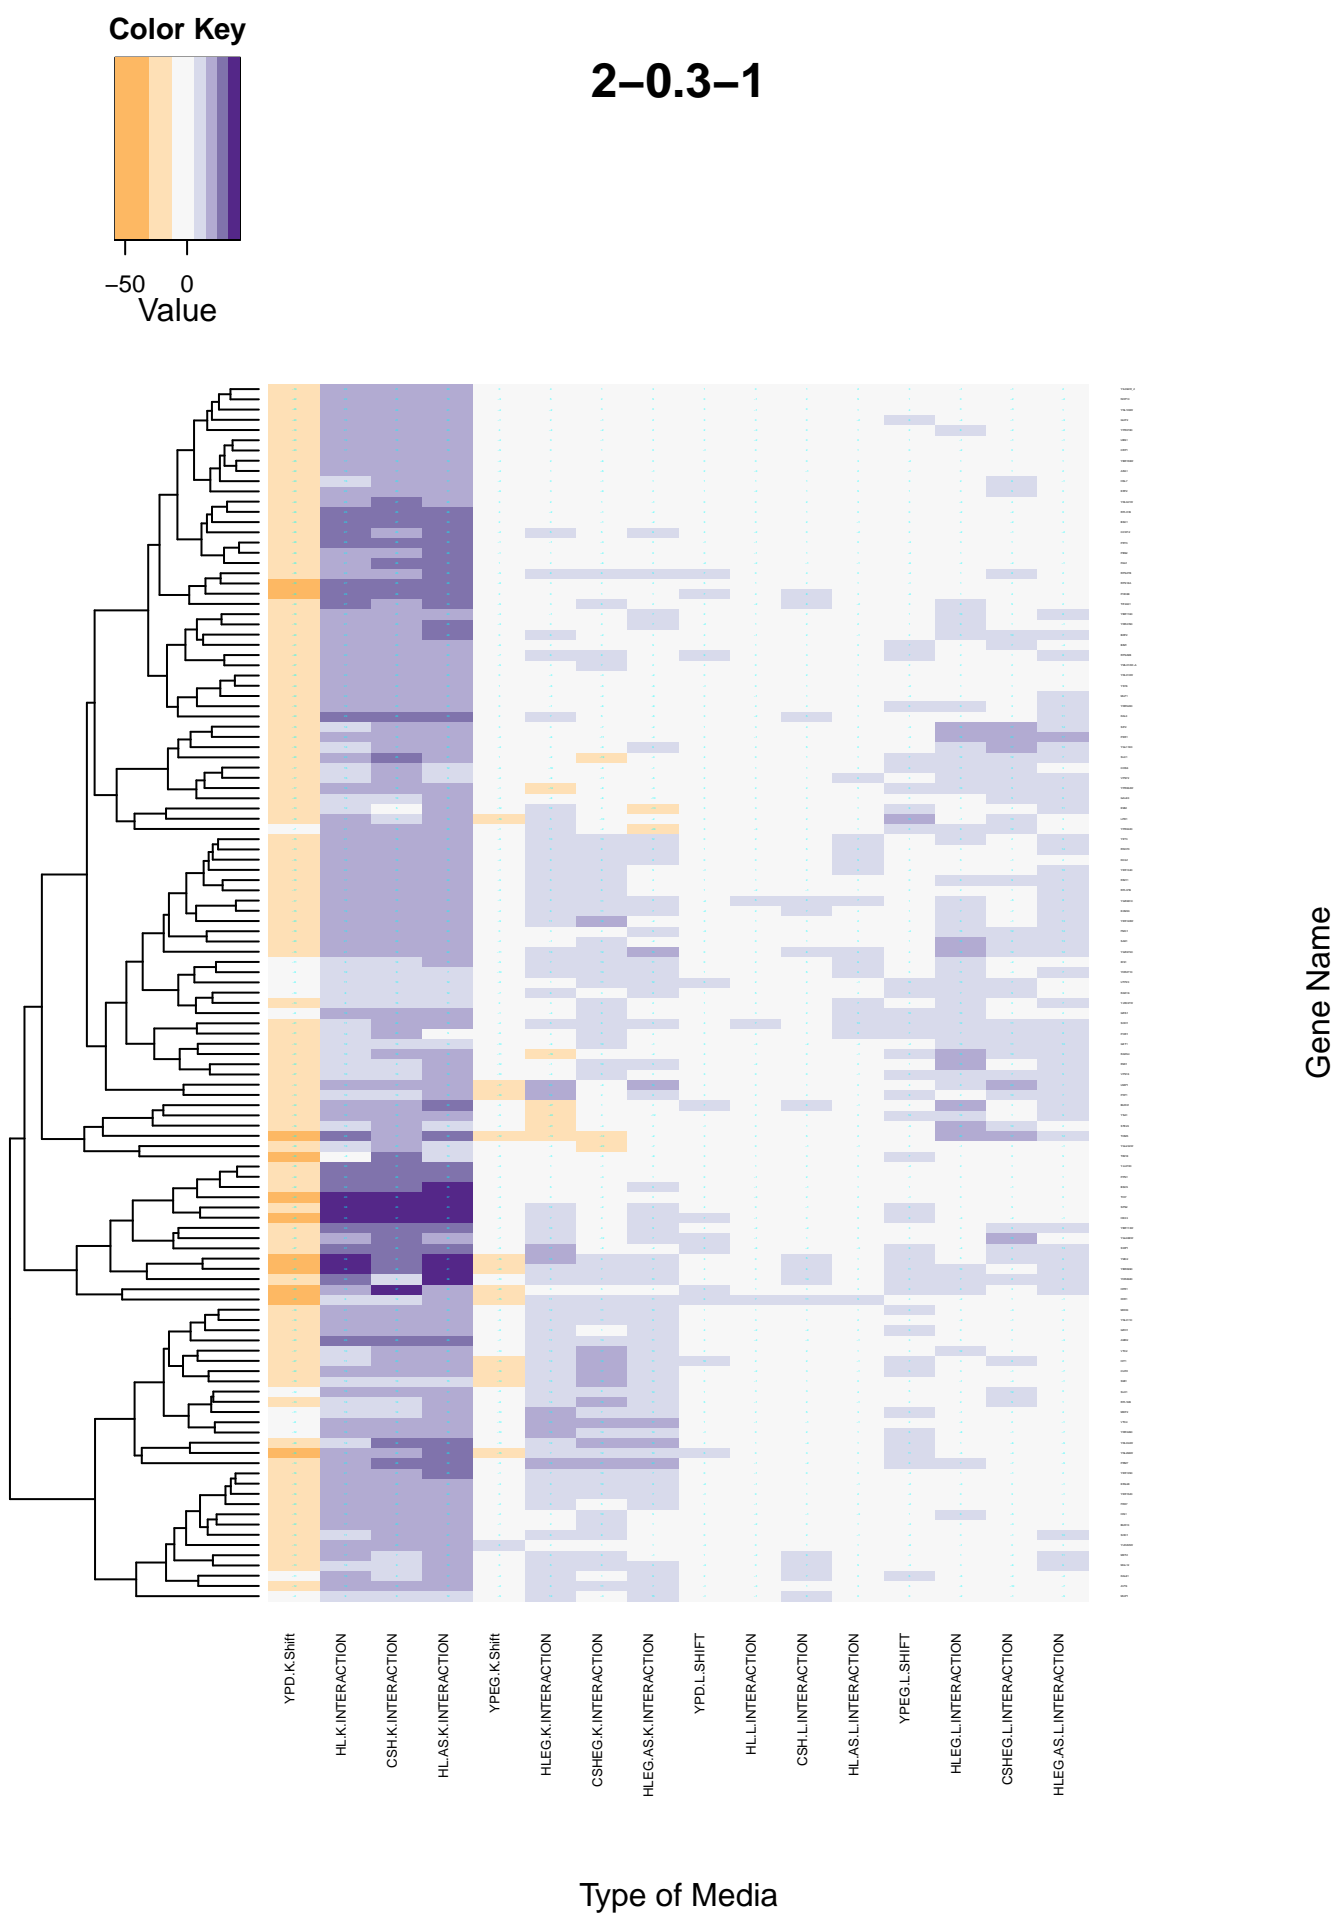

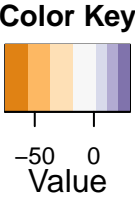

2-0.3-10

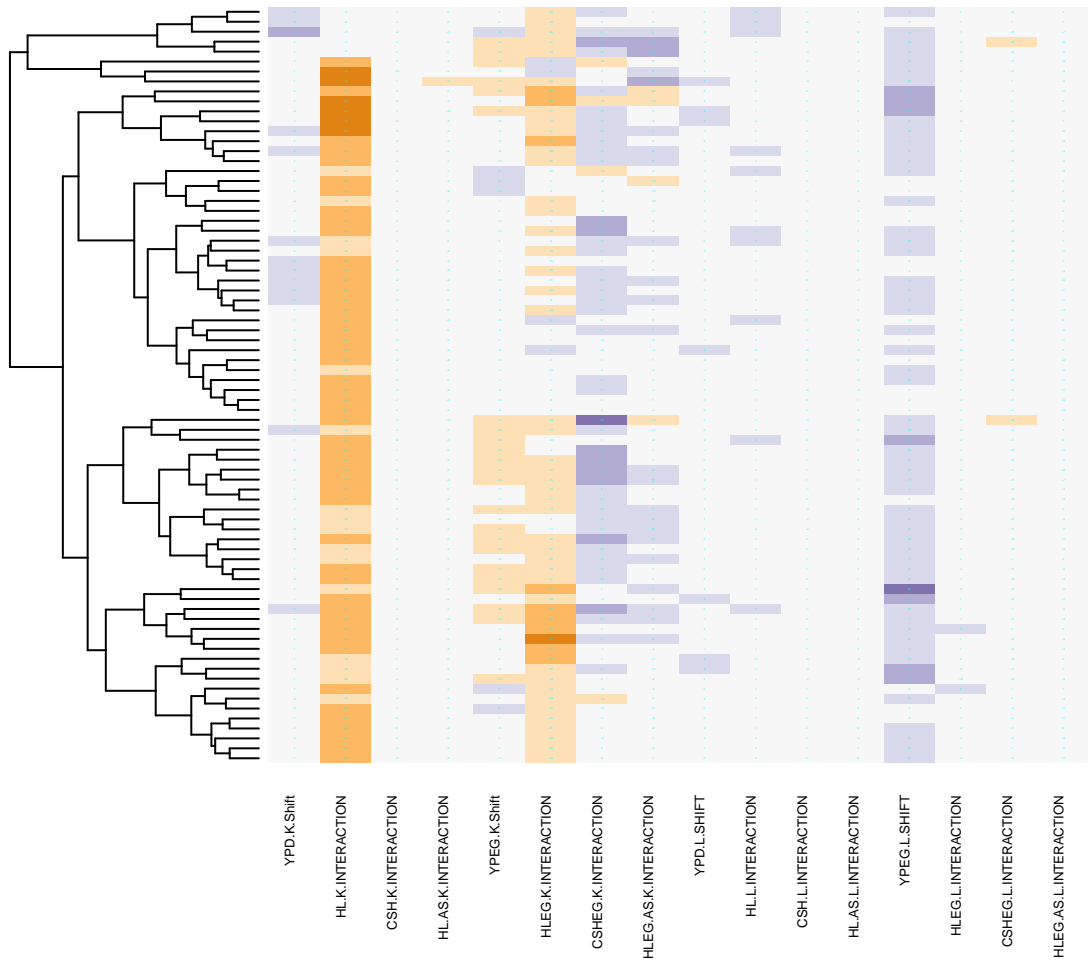

- YLL10W  
ESBP5  
MGI1  
TBB  
NPS2  
RPL4A  
NRK1  
NRK1  
LUT1  
IST3  
NRK1B  
CAF4  
PTC4  
PRC4  
YER05C\_1  
TLO  
AGT1  
RPM4  
Y.A30MC\_2  
YAR120W-A  
YER05C  
YLL10W  
PRC23  
TSP  
YLL14C  
MLP3  
KDC  
ZRG17  
YER05W  
YPS  
KPI1  
RPM4  
TGL2  
LBP7  
HWP  
GSC2  
YER07W\_1  
KPS1  
YER110W  
AGT1  
SGH1  
YER05C  
SGP1  
PMS1  
YCR05C  
YLL20W  
YAK1  
HWP2  
MSG1  
YLL10W  
RPL19B  
RPL41B  
RPL41  
HDA1  
YAL05C  
FEE2  
YAL10C  
YER05C  
SUM  
YER047W  
KPS1  
RHC2  
YER021W  
SWA1  
TRP1  
CHP2  
YPS2  
Y.A30MC\_2  
RBI1  
YLL12W  
SGP2  
MTT  
YAR05C  
DCL1  
LBP1A

Gene Name

Type of Media

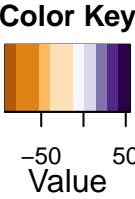

2-0.3-11

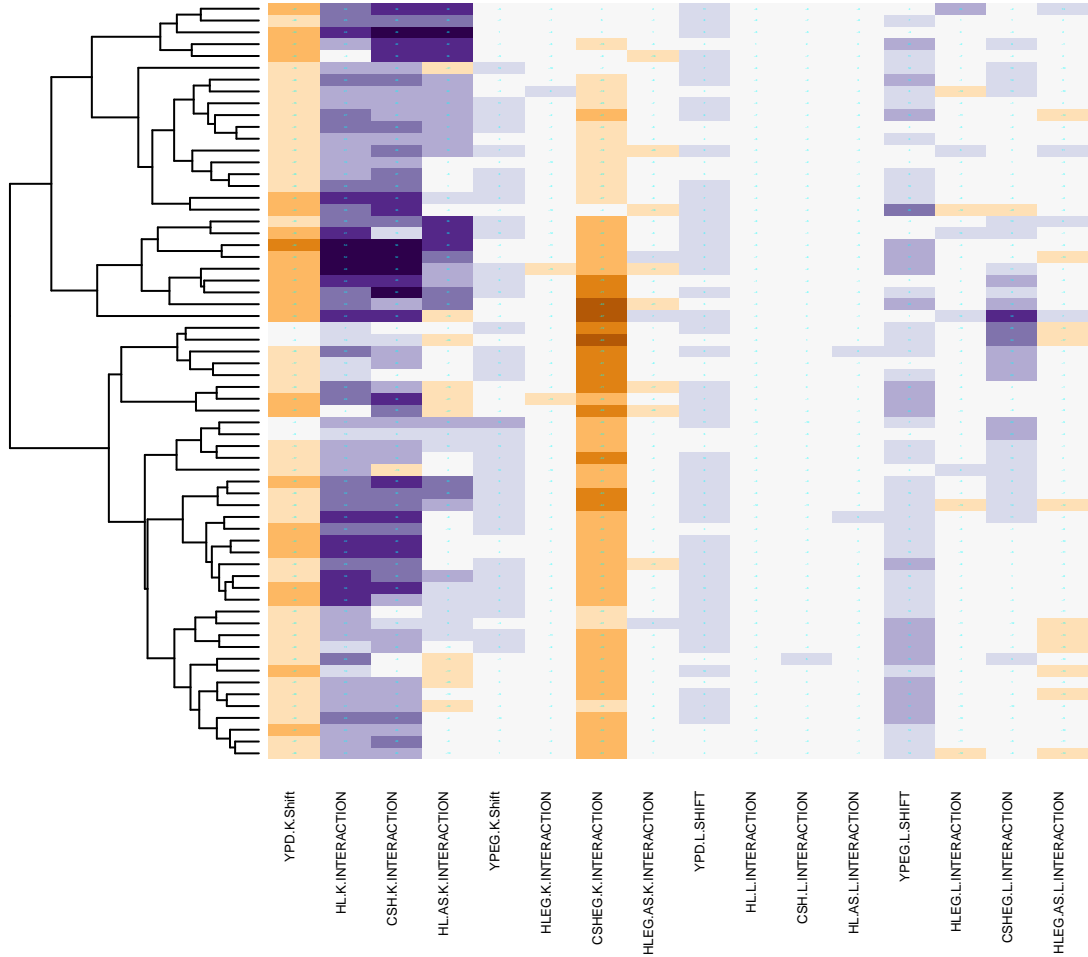

Gene Name

Type of Media

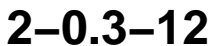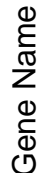

## Type of Media

Color Key

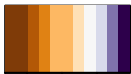

-100 0  
Value

2-0.3-13

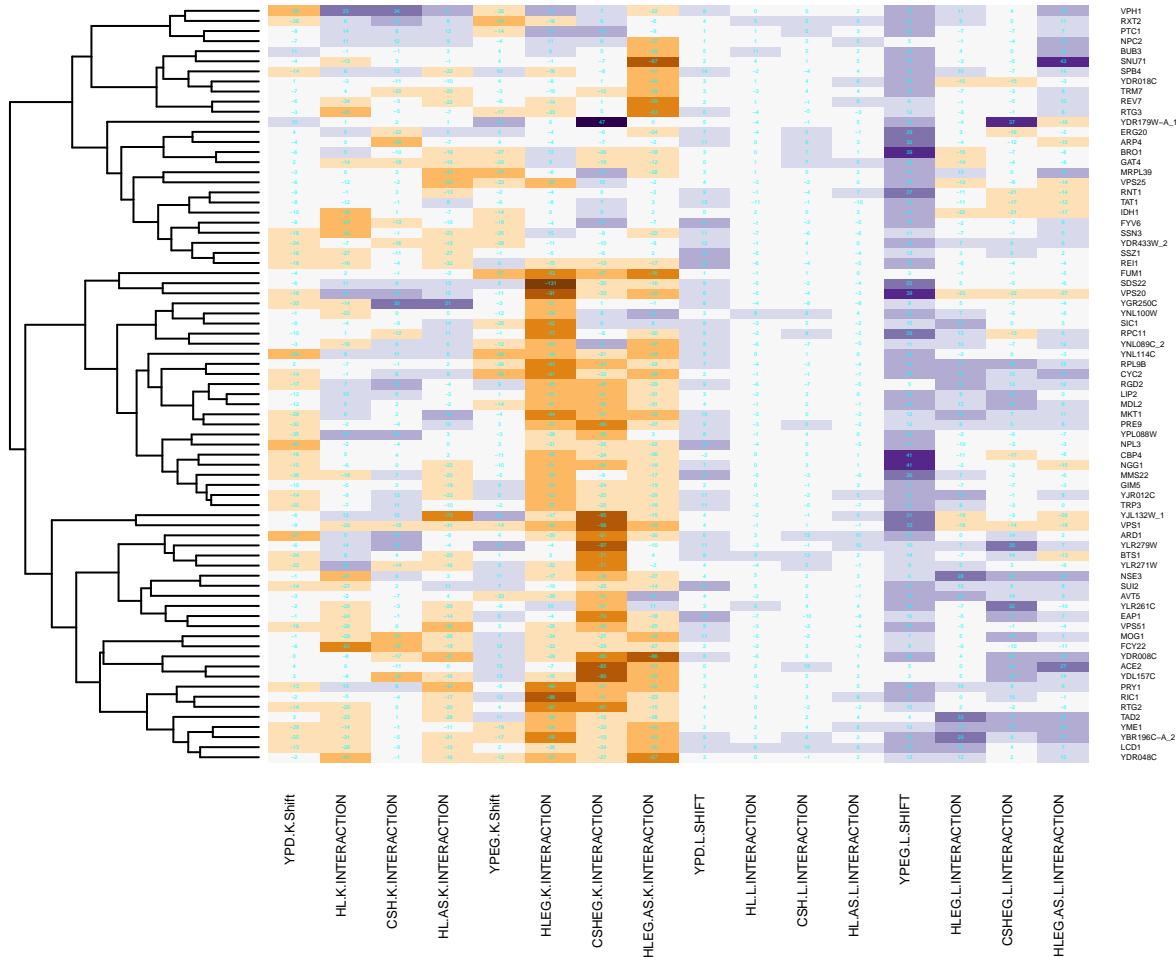

Gene Name

Type of Media

Color Key

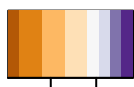

-50  
Value

2-0.3-14

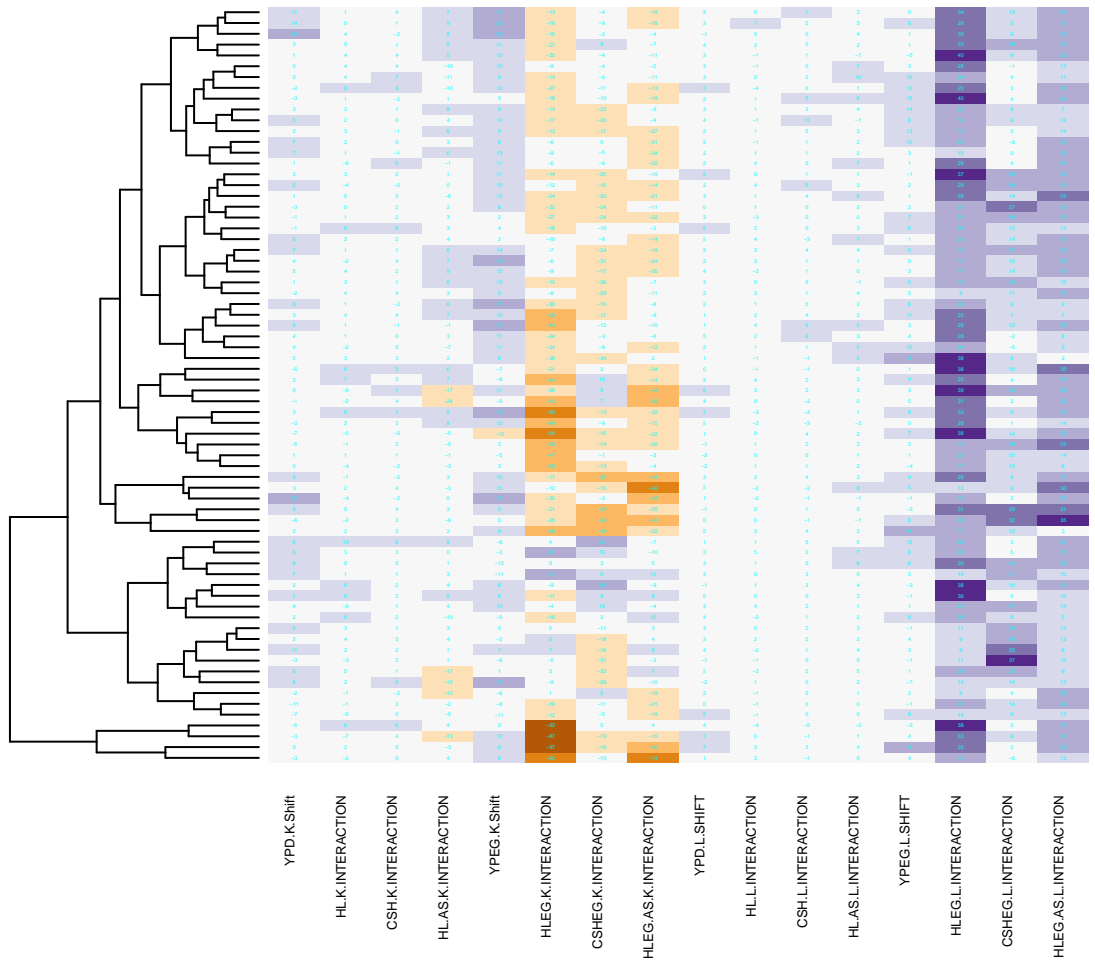

P7A1  
GPA1  
DPB11  
SMC4  
SRC110  
SQT1  
DSM1  
RNM3  
RPL32  
MP51  
GPI11  
PRP45  
PMA1  
APC4  
POP5  
SNU23  
MED6  
DBP10  
YOS9  
YGR103C-A\_2  
NOP8  
YGR204C-A\_1  
PCP11  
RSC6  
CDC39  
SRP101  
NHA1  
MSS4  
PRP9  
GPI13  
ERG26  
RNR2  
MDM30  
NAM9  
CUS1  
ESS1  
DPB2  
GCD6  
SEC1  
RPL19B  
YER093C-A  
YAL119W  
SOD2  
NSE1  
TOP1  
ATG15  
ATP16  
YAL065C  
MPE1  
RPC34  
NOC1  
YGR174W-A\_1  
YOR020W-A\_1  
YLR140W  
TRS130  
ILV3  
ERB1  
BOS1  
YLR118C\_2  
VAN1  
YCL057C-A\_2  
PRT1  
GVP98  
OST6  
YGL057C  
RPL20B  
PFY1  
YCL041C  
ARF3  
PAU2

Gene Name

Type of Media

Color Key

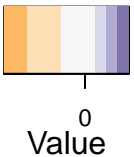

2-0.3-15

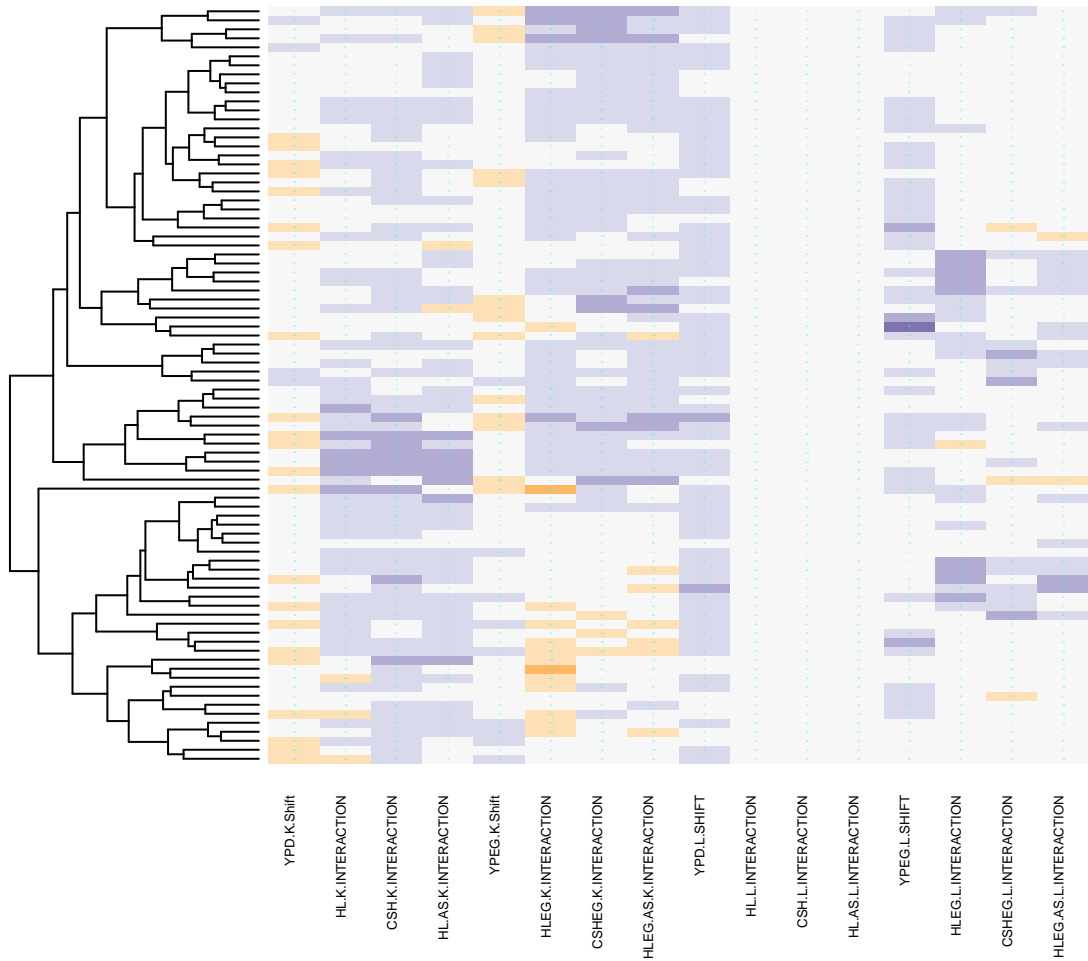

- SPY15
- YAL058C-A\_1
- TGL5
- MRP-24
- YMR358W-A\_1
- YOR030W-A\_1
- YOR194W-A\_1
- SDH1
- HOH1
- YPL255W
- TMA5
- GAK4
- YOR083C
- SLT1
- BLD31
- BRN49
- REL3
- YMA4
- POM34
- BRN2
- EPH1
- SDH1
- YAL219W
- CTU1
- MET22
- YOR083C
- CH1
- ISD11
- LEP2
- YMR348W
- HOH1
- SRP93
- BRX1
- VLL017W
- RAZ1
- MRN44
- GDS1
- GDS1
- YMR156W
- YAL118C-A\_1
- YMR156W
- V.A007W-B\_1
- PL1
- POS1
- MUT1
- YMR020W
- SEC12
- YOH1
- PSH1
- POS2
- YMR022C-A\_1
- YMR022C-B\_1
- YAL146C-A\_2
- YLR169W
- MCK1
- YAL277W-A\_1
- YMR277W-A\_1
- YMR146C-A\_2
- TEA1
- SPY15
- YOL000C\_2
- EFB1
- YOR030W
- GLN1
- SPY16A
- SDH1
- YOR031W
- MRD1
- OST1
- SDH1
- MCK2
- HOH1
- MLP1
- ATG2
- MRN44
- TRP5
- SDH1
- YPL255W
- ELP4
- YOR194W
- MRD2
- BRN1
- BRN1

Gene Name

Type of Media

Color Key

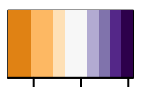

-50 0 50  
Value

2-0.3-16

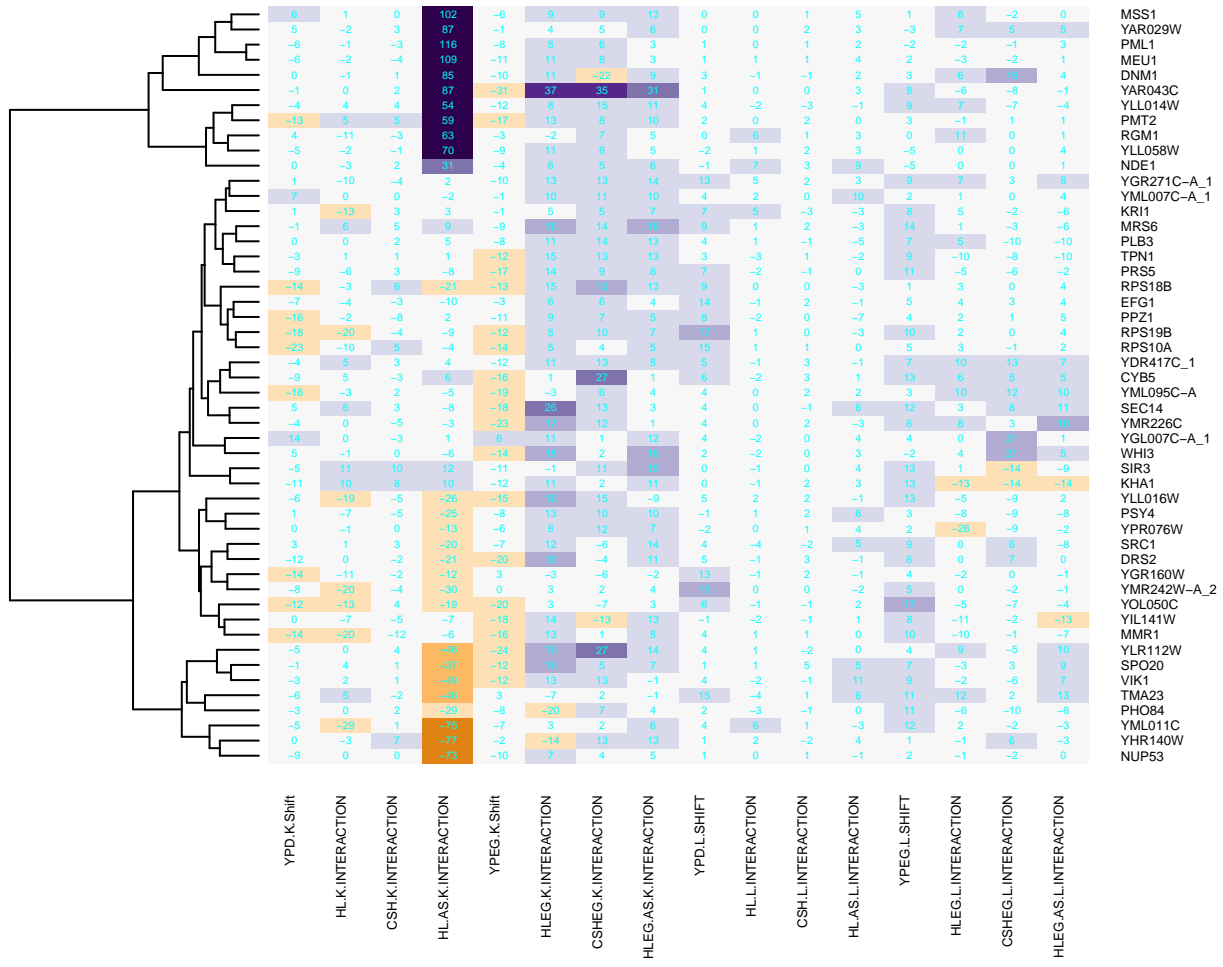

Gene Name

Type of Media

Color Key

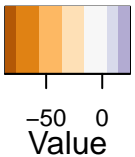

2-0.3-2

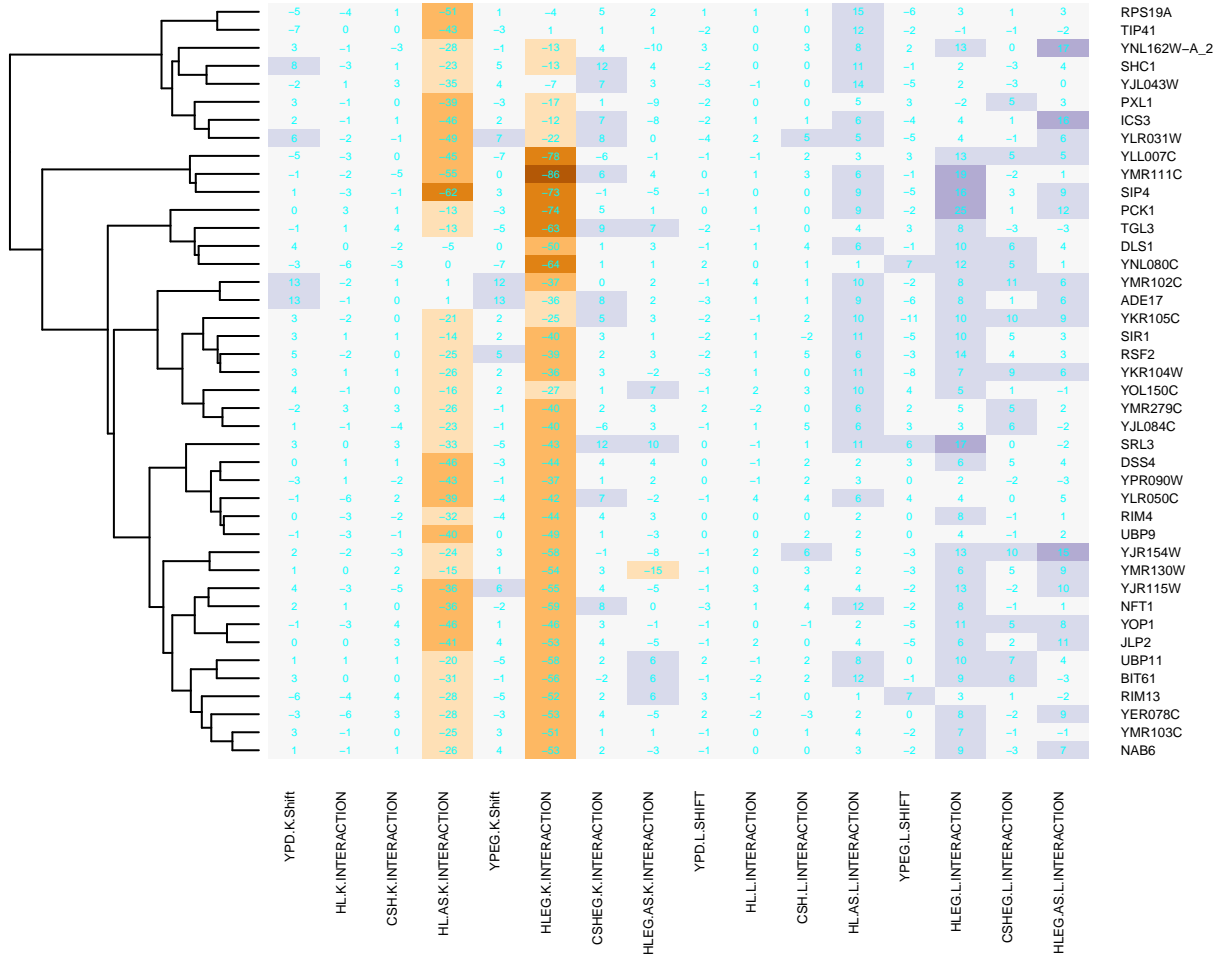



Color Key

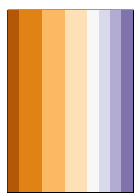

-50 0  
Value

2-0.3-4

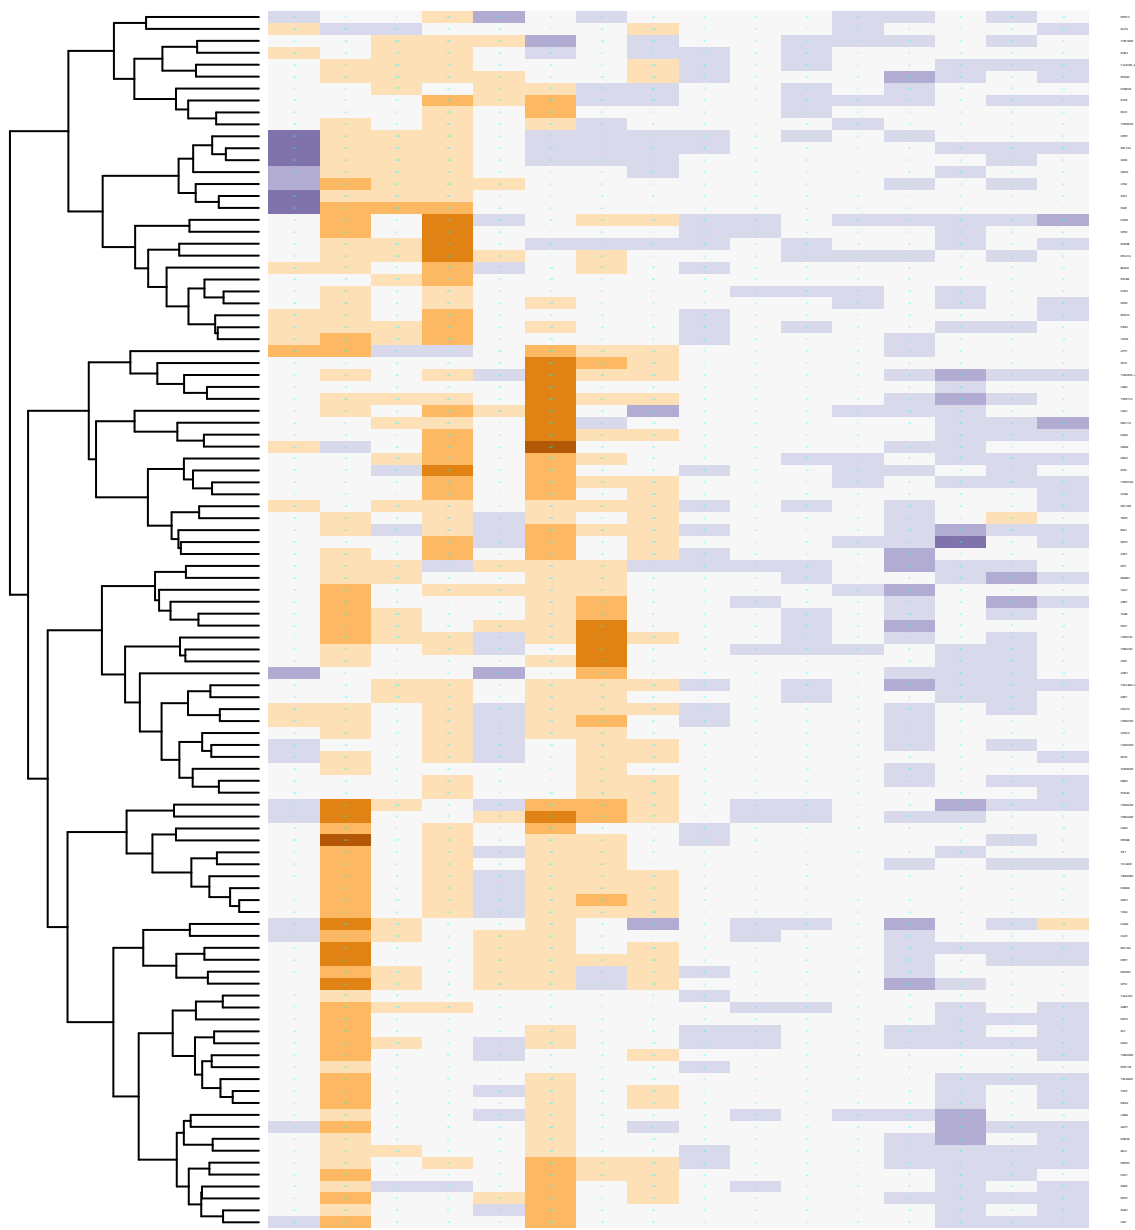

YPD K.Shift  
HLL K.INTERACTION  
CSH K.INTERACTION  
HLL K.INTERACTION  
YPD K.Shift  
HLL K.INTERACTION  
CSH K.INTERACTION  
HLL K.INTERACTION  
YPD L.Shift  
HLL L.INTERACTION  
CSH L.INTERACTION  
HLL L.INTERACTION  
YPD L.Shift  
HLL L.INTERACTION  
CSH L.INTERACTION  
HLL L.INTERACTION

Gene Name

Type of Media

Color Key

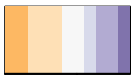

0  
Value

2-0.3-5

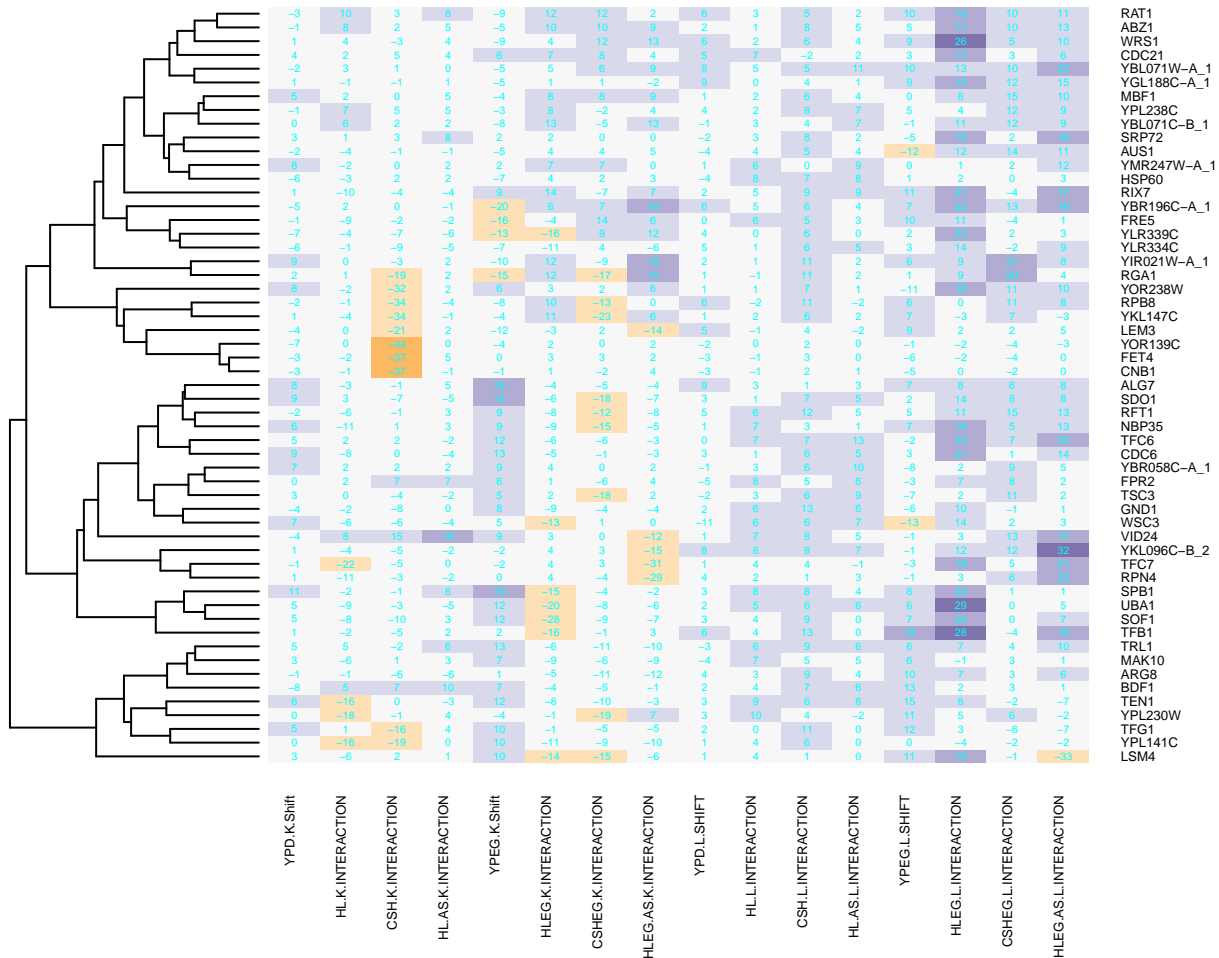

Type of Media

Color Key

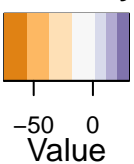

2-0.3-6

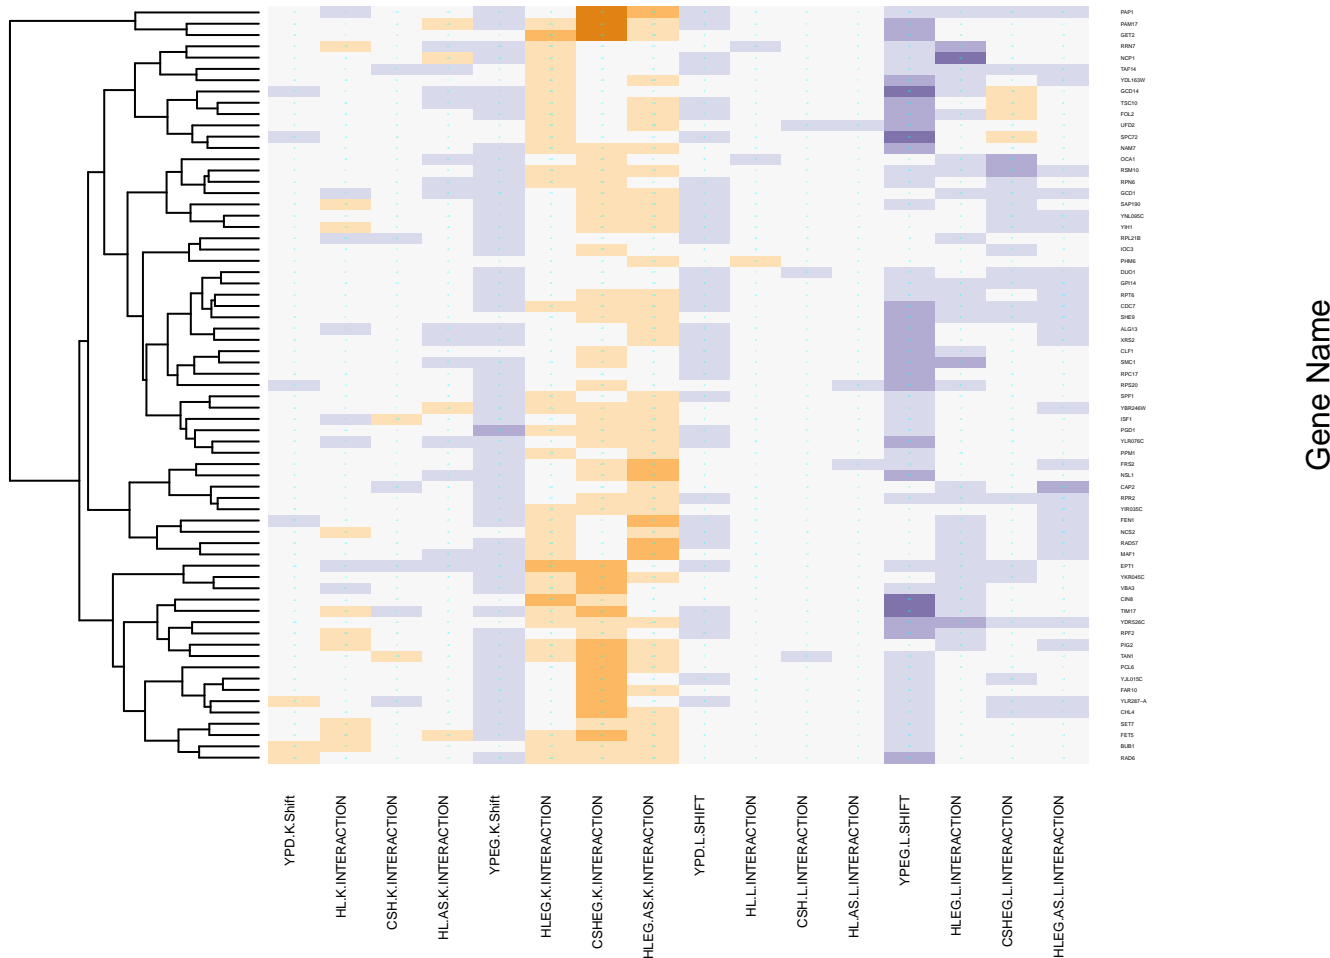

Type of Media

Gene Name

Color Key

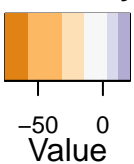

2-0.3-7

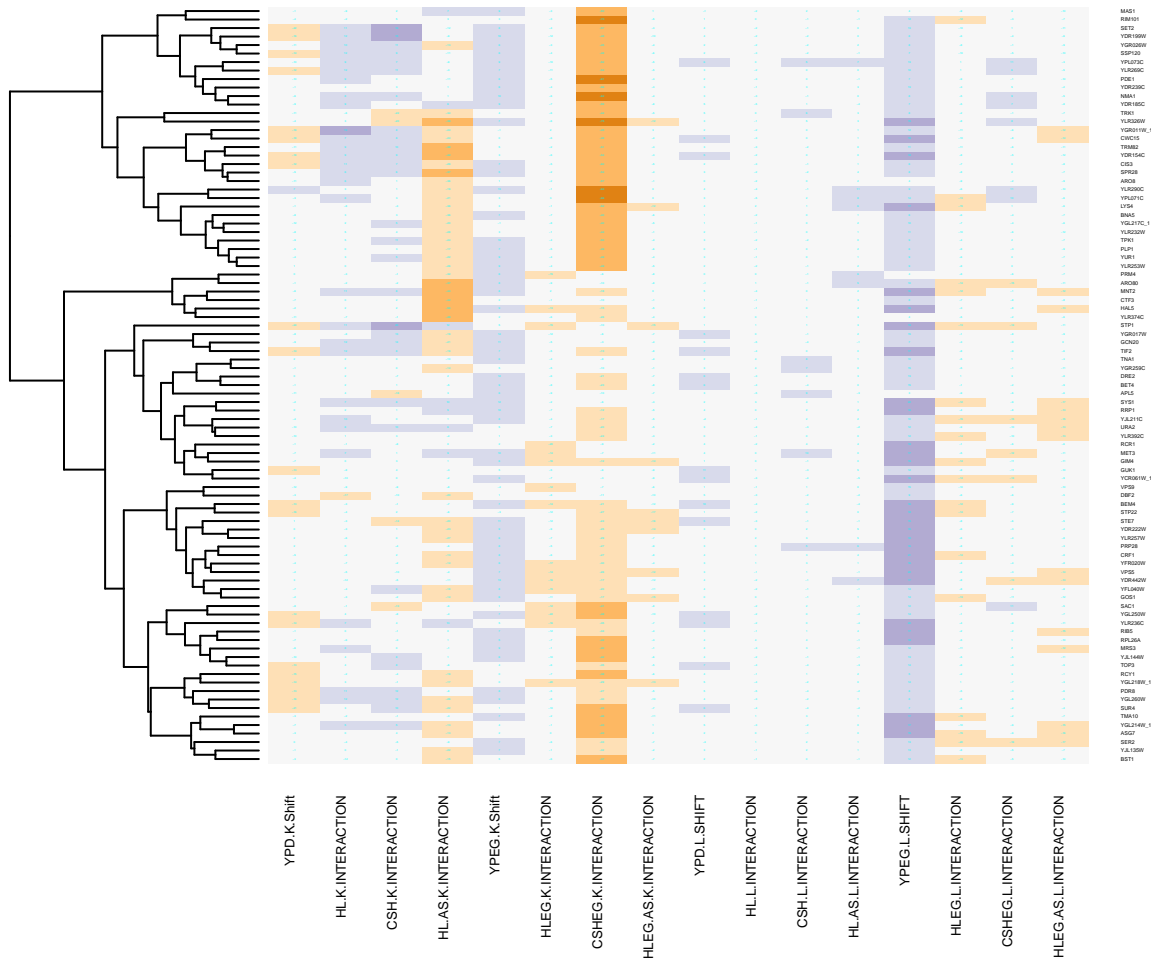

Type of Media

Color Key

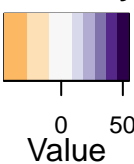

2-0.3-8

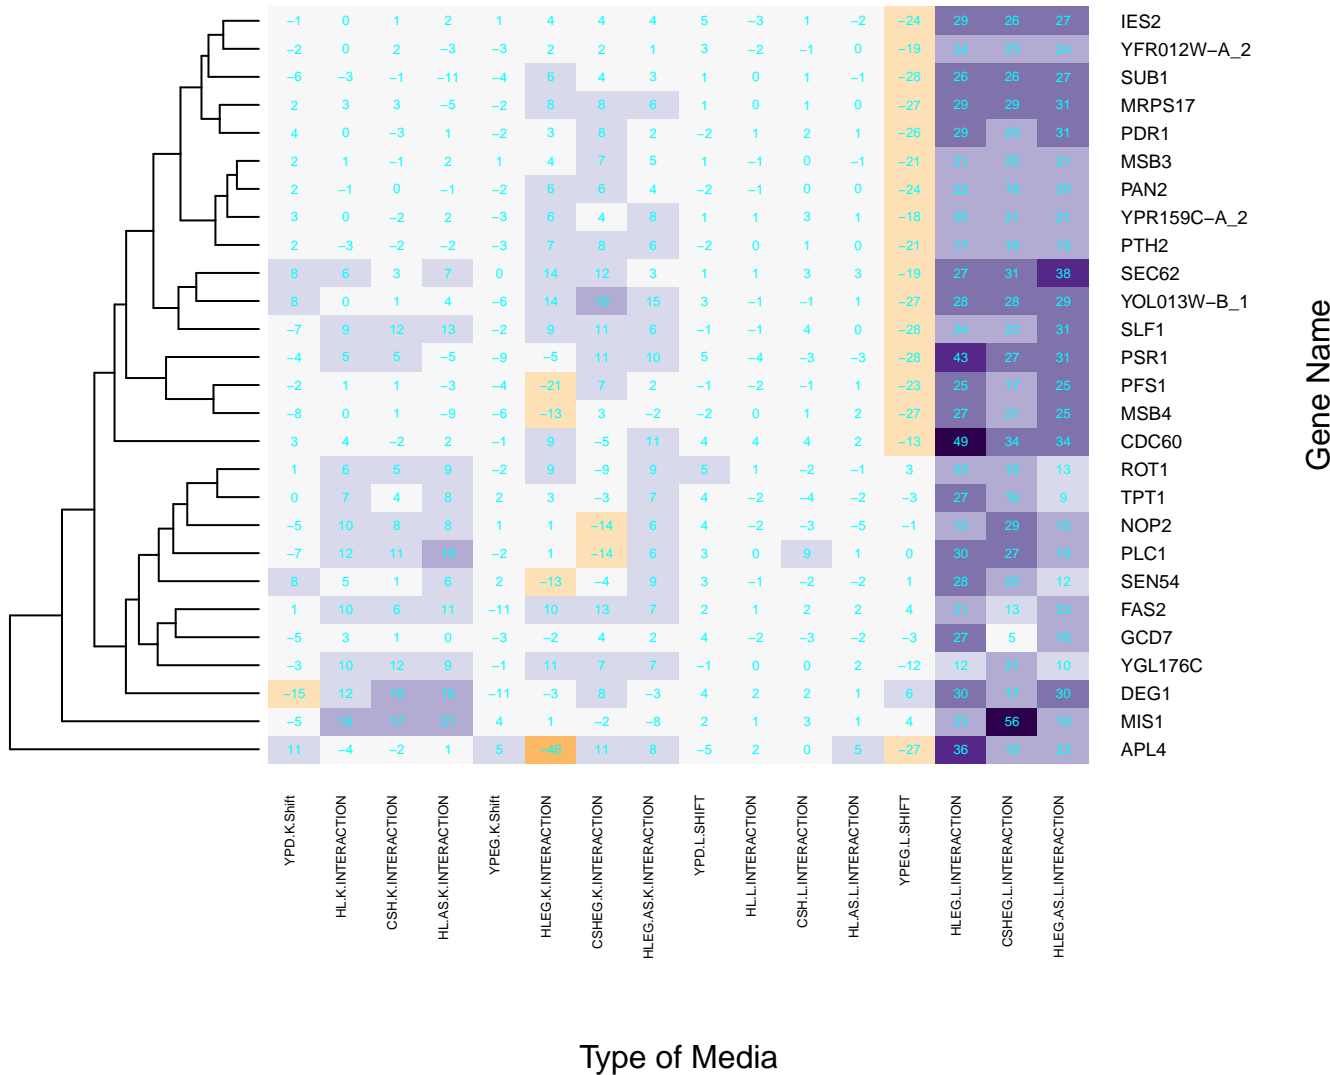

Color Key

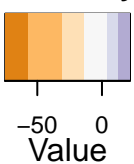

2-0.3-9

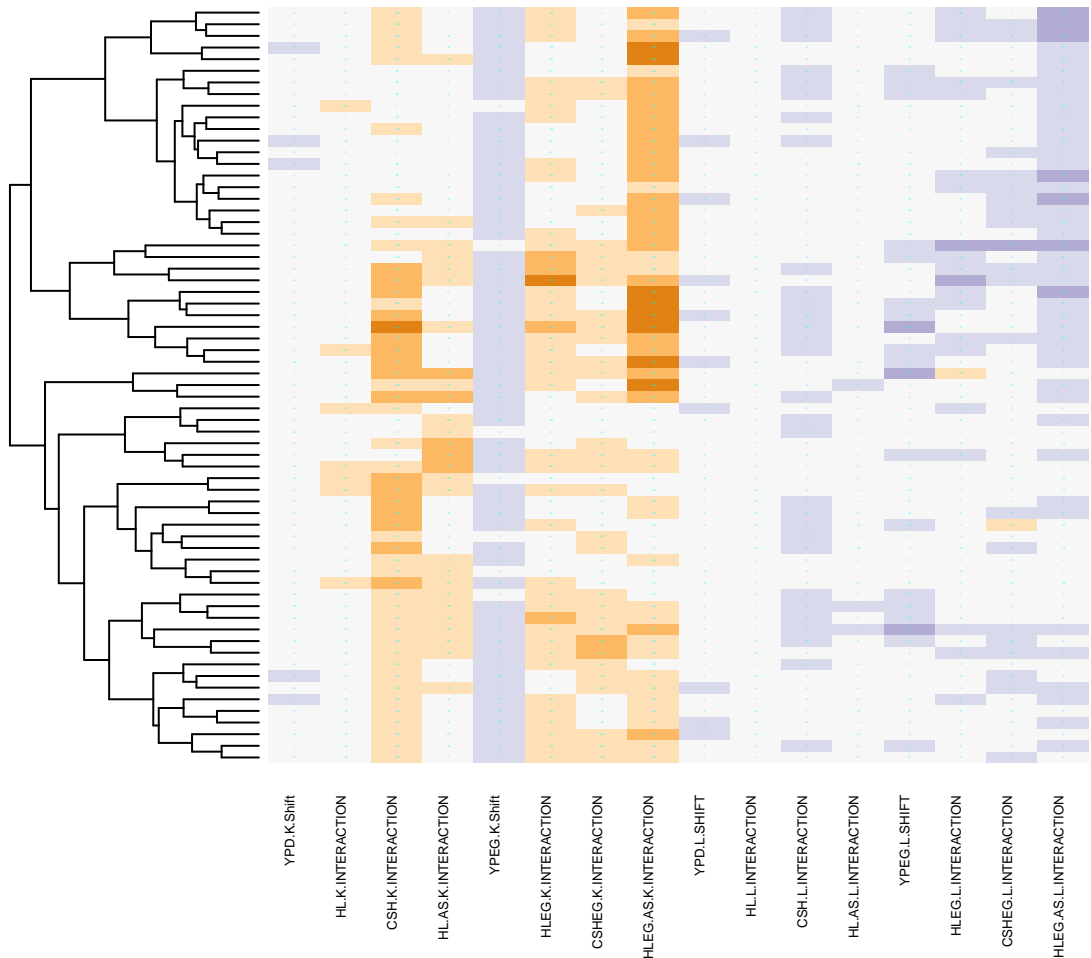

YJG54C  
YJL15W  
RPP1B  
YJL07W  
LAI  
TES1  
YOR00W\_2  
PPG2  
TBA12B  
MCH5  
SNG2  
RPS11A  
RSC2  
PHO13  
YJL23W  
YOR04C  
YOR04C\_2  
TBA17  
YJL14C  
YOR03W  
SAM7  
GCY1  
ATY1  
YOR011W\_2  
LUD  
YJG06W  
TMA2  
RPP4B  
HAP1  
RAD61  
VPS3  
RSC2  
CSM1  
BBC1  
ATY1  
YJL08C  
SNL1  
RTT103  
HOM2  
CTF19  
RPS4B  
HOM5  
LYS2  
YJL17W  
LYS2  
YOR04C  
YJL15W  
YJL08C  
YJL15W  
YOR01W  
APF1  
BOP1  
HOM3  
ATG18  
RTT107  
TBA  
YOR02W  
VPI  
YJL04C\_1  
YJL04C  
YJL16C  
PAP1  
SOL  
YJL01W-A  
YJL01W  
YJL04C-A  
YJL02W  
MNT4

Gene Name

Type of Media

Color Key



2-0.4-0

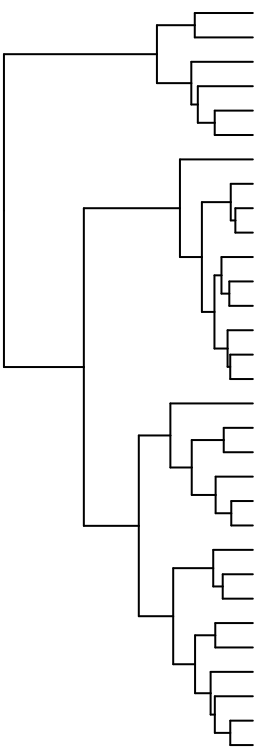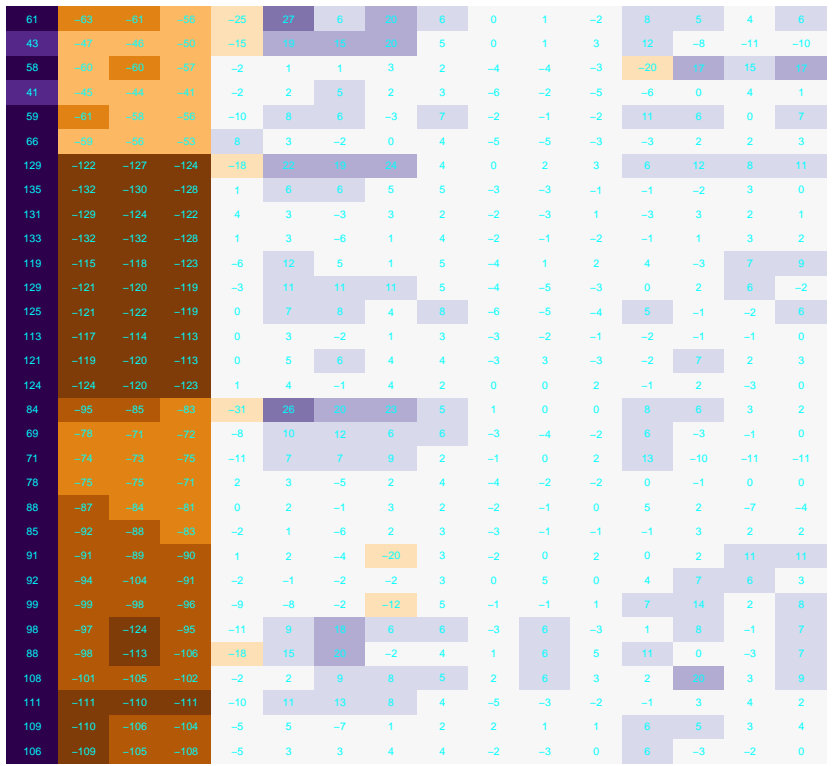

- LHP1
- GPR1
- LRS4
- AMS1
- FIT1
- HMG1
- YER163C
- RPS26B
- YPR013C
- SEC66
- YER130C
- MAD3
- PEA2
- ARC18
- YFL012W
- YDR506C\_1
- PSP1
- BUD32
- ARL1
- YMD8
- REC8
- YBR139W
- GPD1
- APA2
- YGL101W\_1
- LSM7
- TPD3
- RAD4
- YIP5
- YKR106W
- MMT2

Gene Name

- YPD.K.Shift
- HLK.INTERACTION
- CSH.K.INTERACTION
- HLAS.K.INTERACTION
- YPEG.K.Shift
- HLEG.K.INTERACTION
- CSHEG.K.INTERACTION
- HLEG.AS.K.INTERACTION
- YPD.L.Shift
- HLL.INTERACTION
- CSH.L.INTERACTION
- HLAS.L.INTERACTION
- YPEG.L.Shift
- HLEG.L.INTERACTION
- CSHEG.L.INTERACTION
- HLEG.AS.L.INTERACTION

Type of Media

Color Key



2-0.4-1

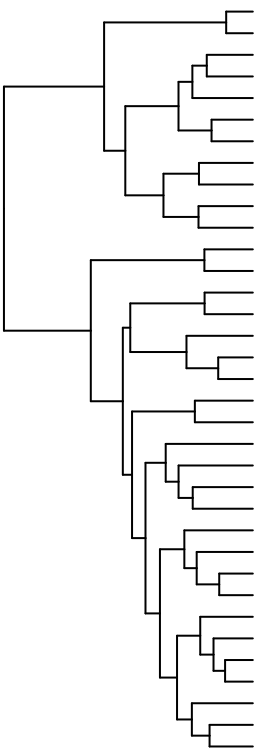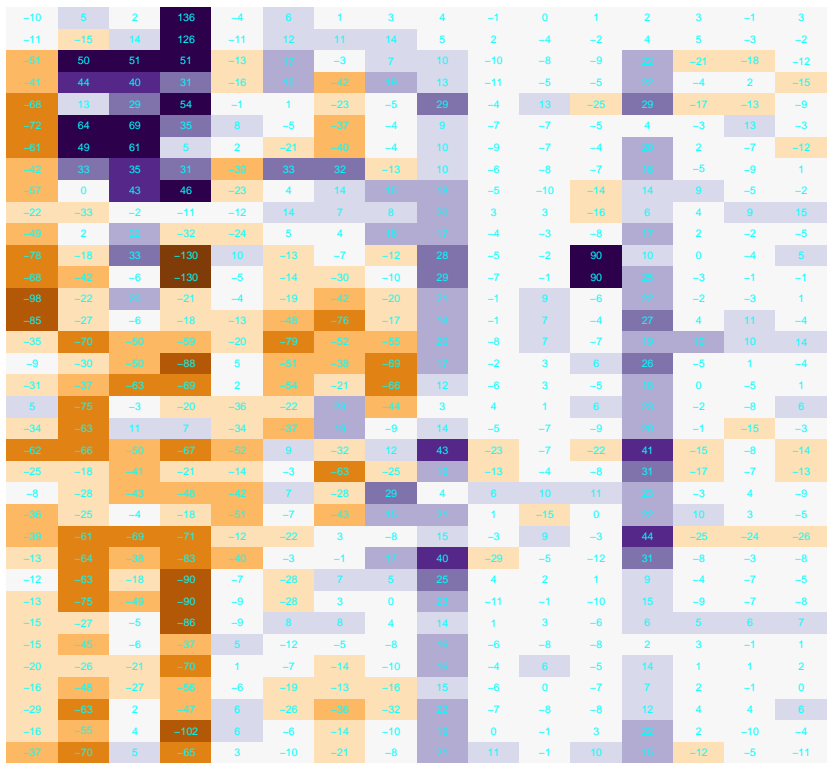

- ADE1
- CLN1
- NUP42
- YPL077C
- ADH1
- KAP114
- YLR414C
- MLH1
- RAD52
- BUD22
- SPT21
- LOC1
- DBP7
- RPL39
- RPB4
- VPS66
- YJR018W
- HTL1
- TOM7
- SSN8
- YJL188C
- SRB8
- YLR358C
- NUP120
- YLR322W
- RPL39
- SNT309
- SPT10
- RPS17A
- NUP84
- ZUO1
- HIT1
- NUP133
- RPT1
- SOY1

Gene Name

- YPD.K.Shift
- HLK.INTERACTION
- CSH.K.INTERACTION
- HLAS.K.INTERACTION
- YPEG.K.Shift
- HLEG.K.INTERACTION
- CSHEG.K.INTERACTION
- HLEG.AS.K.INTERACTION
- YPD.L.Shift
- HLL.INTERACTION
- CSH.L.INTERACTION
- HLAS.L.INTERACTION
- YPEG.L.Shift
- HLEG.L.INTERACTION
- CSHEG.L.INTERACTION
- HLEG.AS.L.INTERACTION

Type of Media

Color Key



2-0.4-2

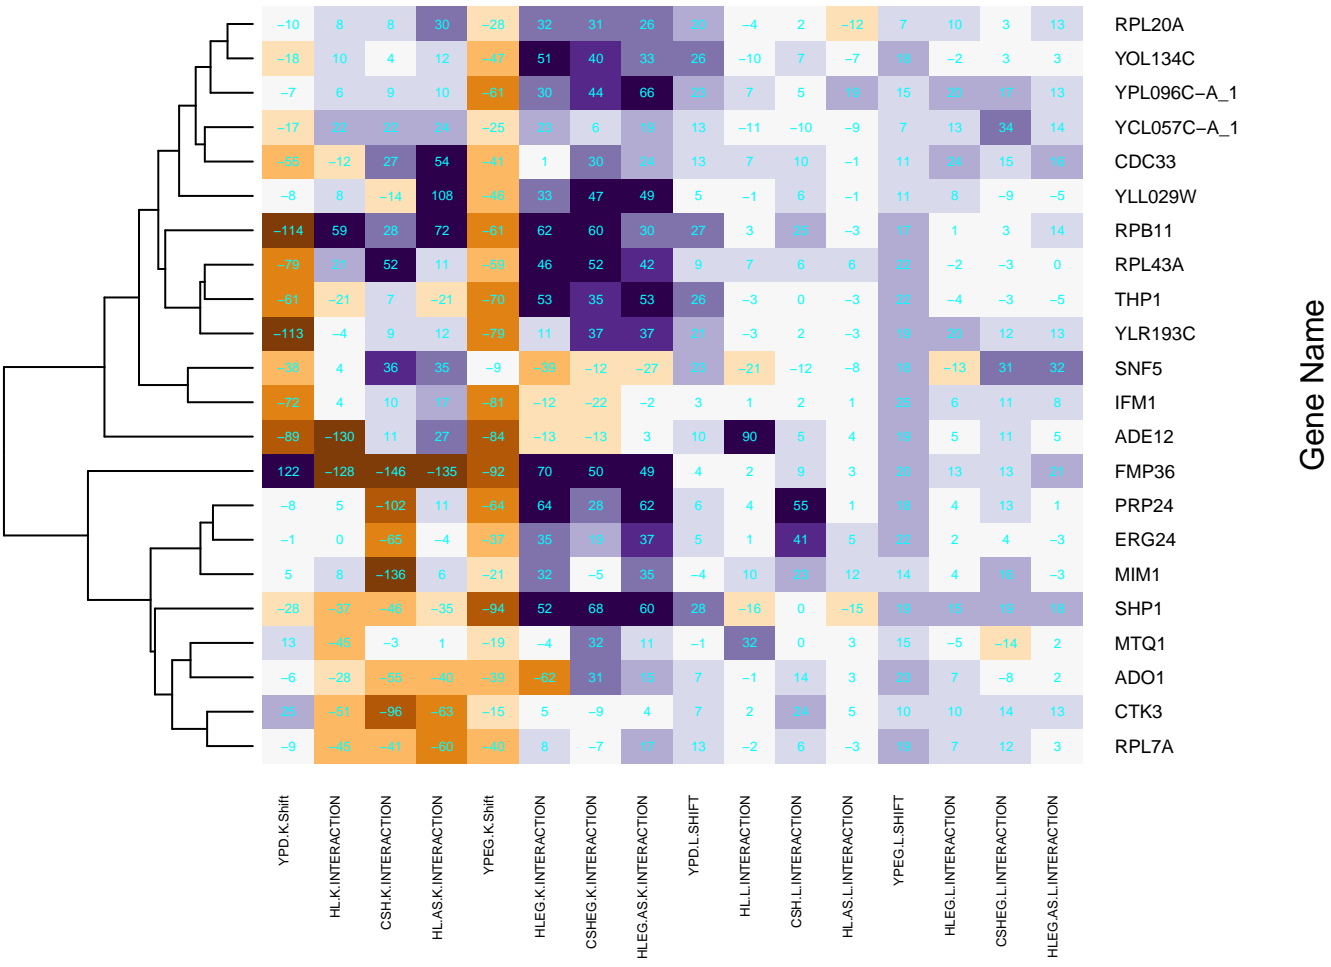

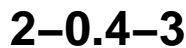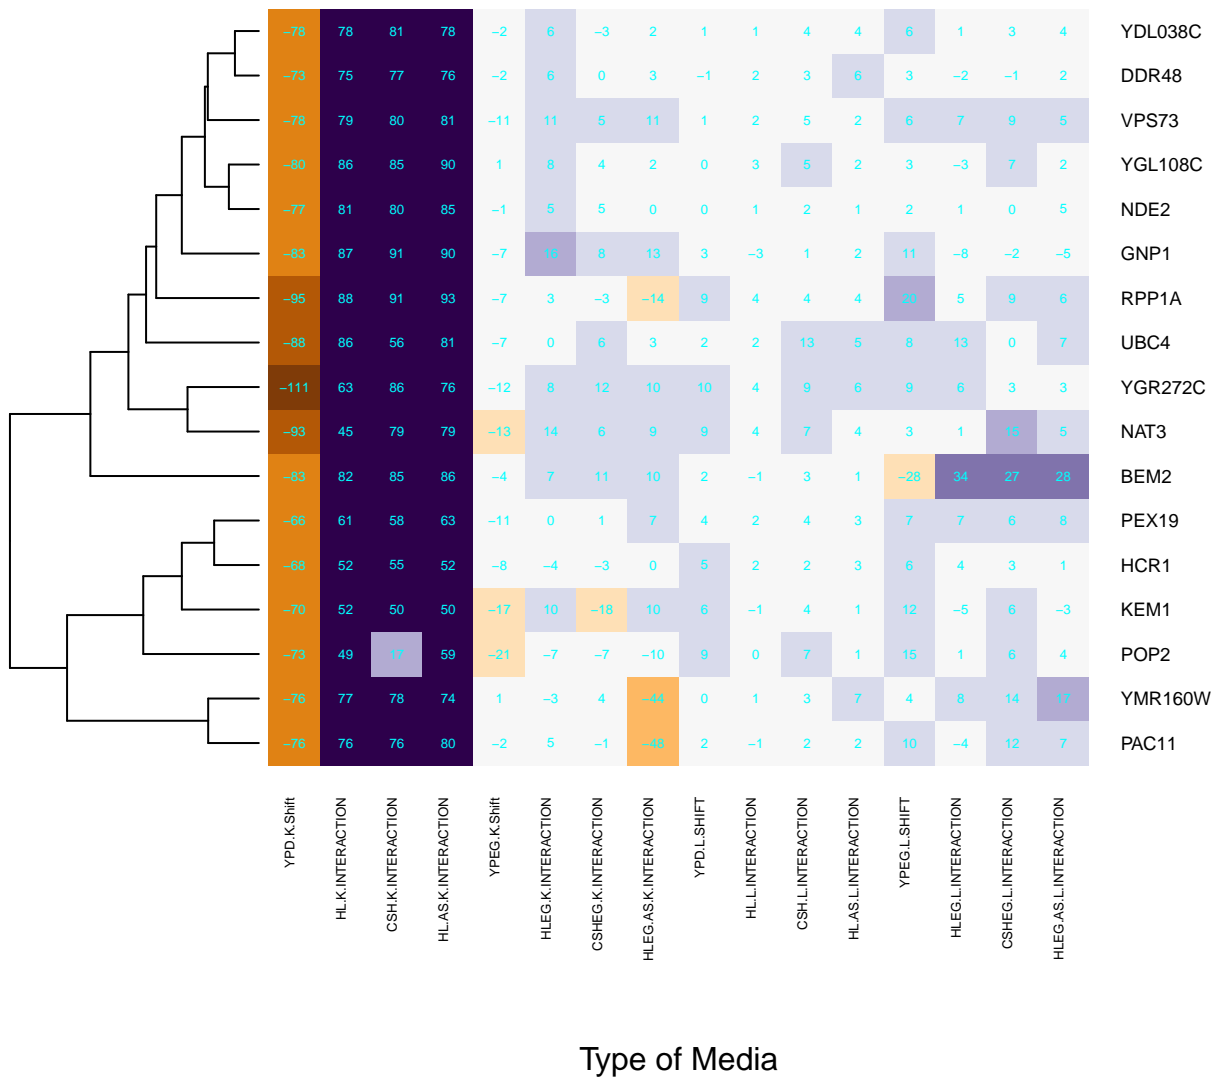

Gene Name

Color Key



2-0.4-4

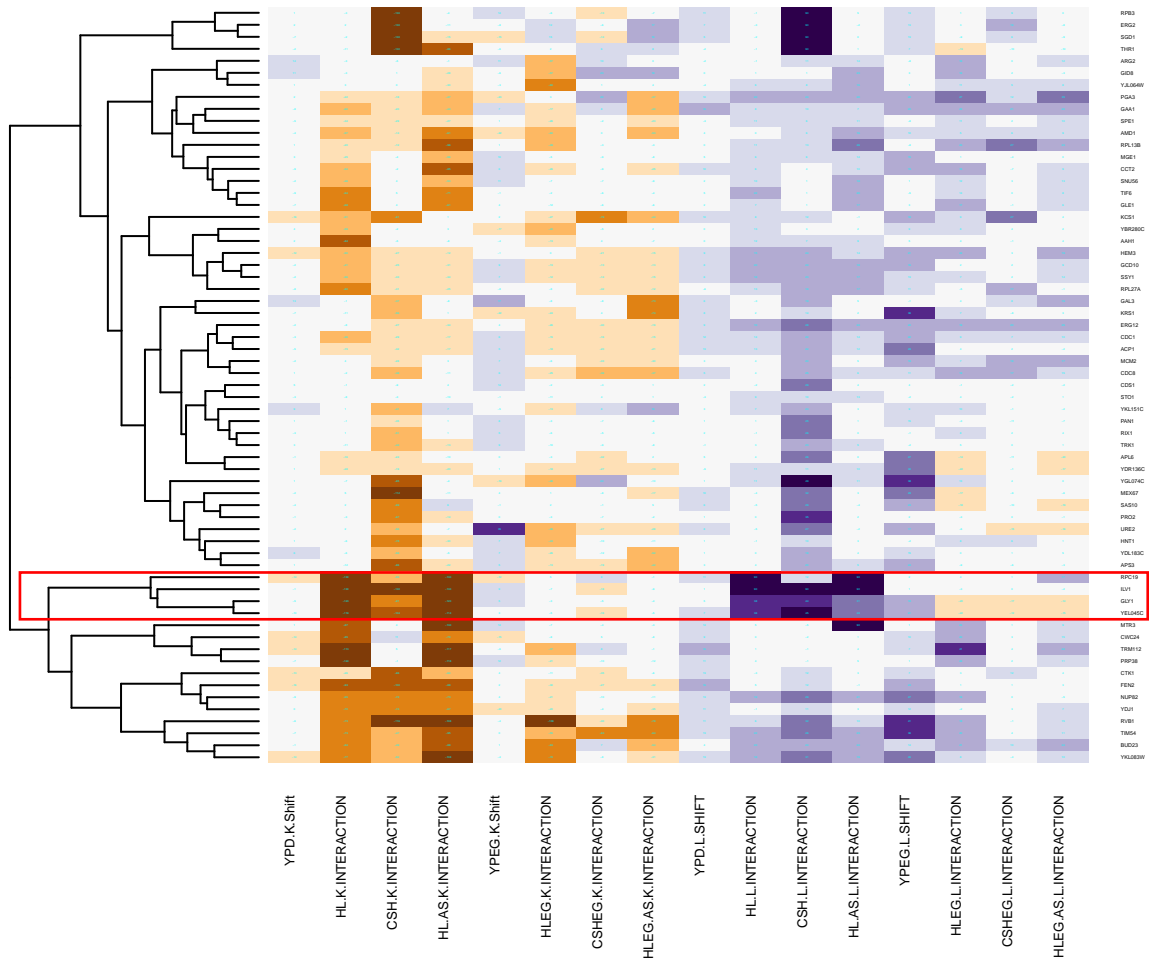

RPB3  
RPS2  
SSD1  
TRH1  
ARG2  
SIR8  
VAL6AW  
PGA3  
GAT1  
RPS1  
AMD1  
RPL13B  
MGE1  
CTD  
SNR55  
TFE  
GLR1  
KDS1  
YBR26C  
AAH1  
HMO1  
SCD10  
SSY1  
RPL27A  
GAC3  
RPS1  
ERG12  
CDC1  
ACPI  
NDC8  
CDC8  
CDS1  
STO1  
VELGAC  
RAN1  
RDX1  
TRH1  
RPS4  
YOR156C  
YGL24C  
MEN2  
SAP30  
PRG2  
URE2  
INT1  
VELGAC  
AP33  
RBY1  
RY1  
RY1  
VELGAC  
MTR3  
CHY24  
TRH12  
PRP38  
CTR1  
FEN2  
NUP2  
YOL1  
RUB1  
TMS6  
BLE3  
YGL23W

Gene Name

Type of Media

Color Key

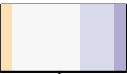

0  
Value

2-0.5-0

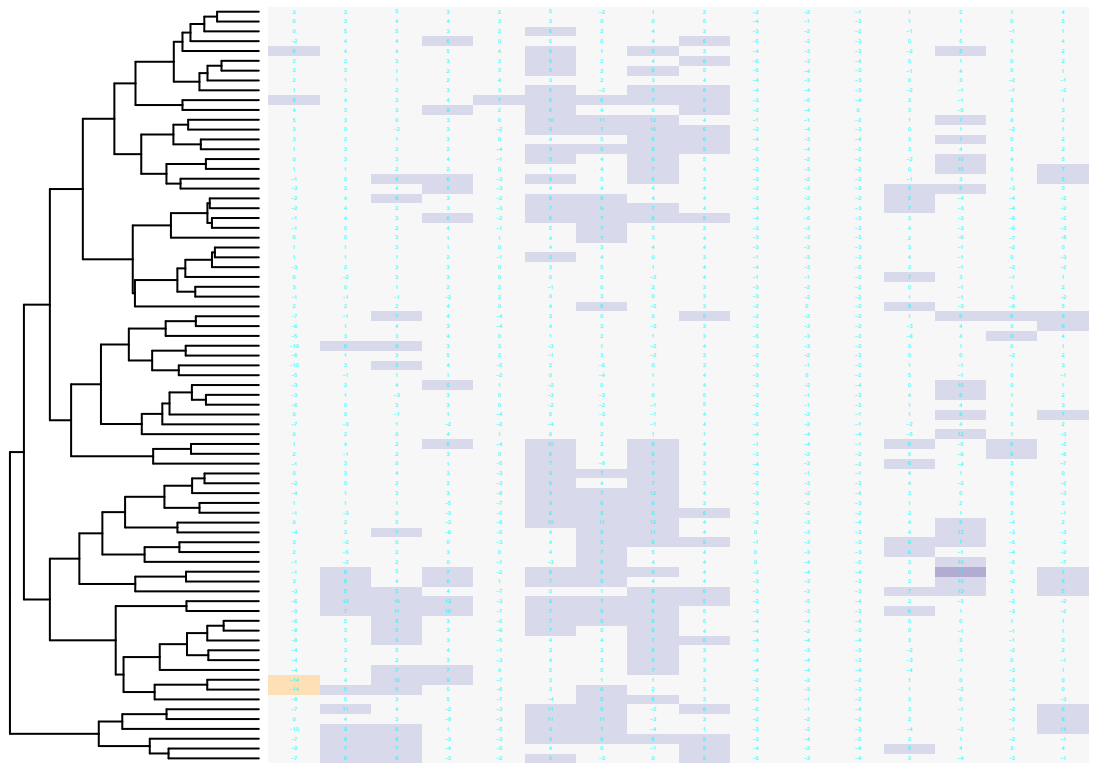

Gene Name

- MYO2
- YGR161W-C
- RAP1
- CDG31
- DPM1
- NAR1
- SDC2
- YOR293C-A\_2
- RP43
- WH2
- YNL162W-A\_1
- POL2
- YLR383W-A\_1
- SEN16
- MRF516
- YIR021W-A\_2
- CWZ26
- HRT1
- ATX2
- KAR9
- ALD4
- YBR220W-A\_1
- ESC8
- RPS7B
- YOR044W
- ALG5
- PP4A
- SCP1
- YOL164W-A\_2
- YOR071C
- YET1
- ARO8
- YFR035C
- YBR134W
- YOR338W
- YOL057W
- TIR4
- YOR314W
- YIL048W-A\_2
- RSB1
- SNC2
- RMD1
- RRP6
- YOL019W
- AVO1
- SSB2
- WSC2
- POB3
- HXT14
- RIA1
- CYL1
- YFR032C-B\_2
- YMR030W
- PEP5
- MTW1
- DIPS
- YOL014W
- DRK1
- LSM3
- RPC82
- YOR182W-A\_1
- YOR082C
- NAP1
- CBF1
- HEM15
- RIO1
- MTR10
- TOP2
- SLC1
- DSK2
- SCS7
- FMP42
- YMR007W
- EQM1
- YLR046C
- GAL80
- YLR042C

Type of Media

Color Key

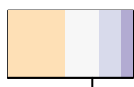

0  
Value

2-0.5-1

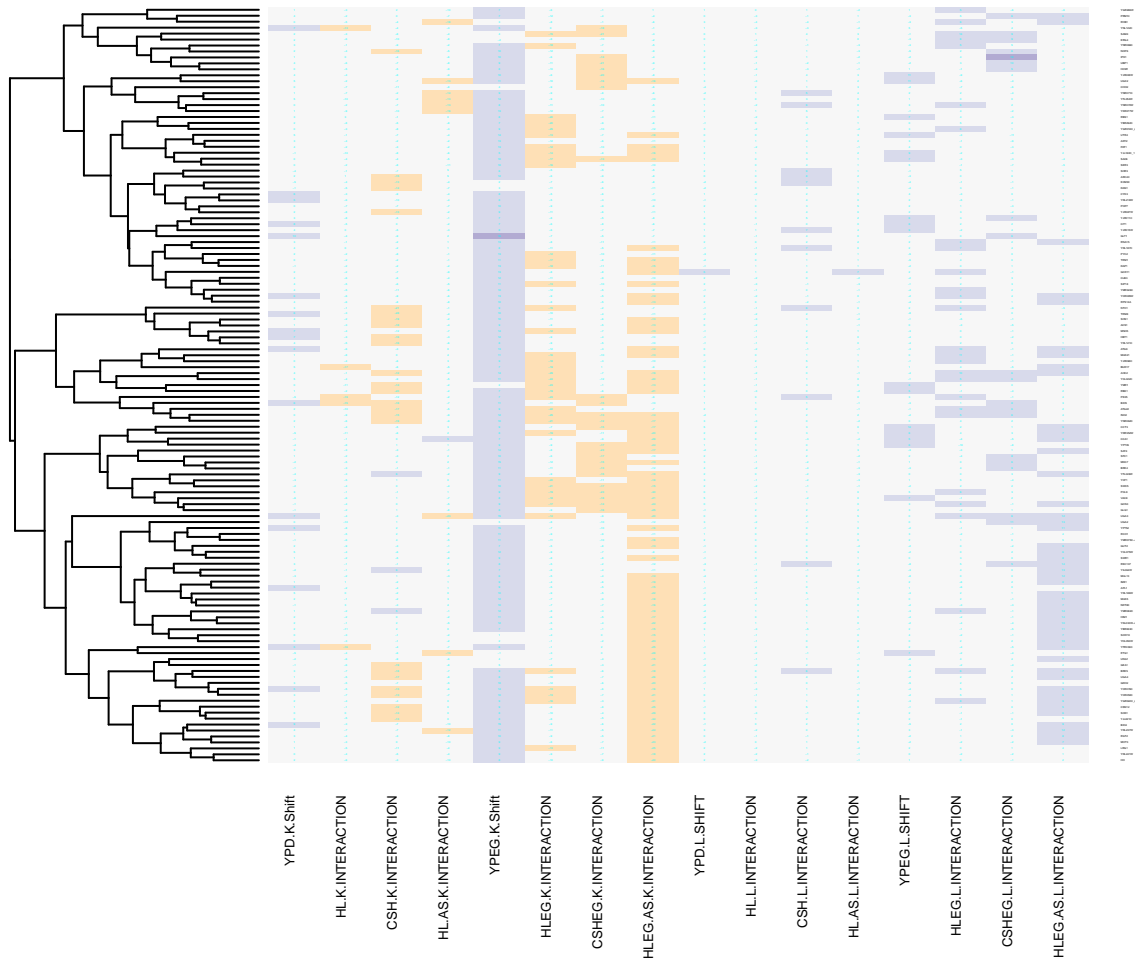

Type of Media

Gene Name

Color Key

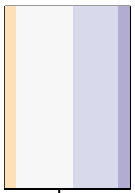

Value

2-0.5-10

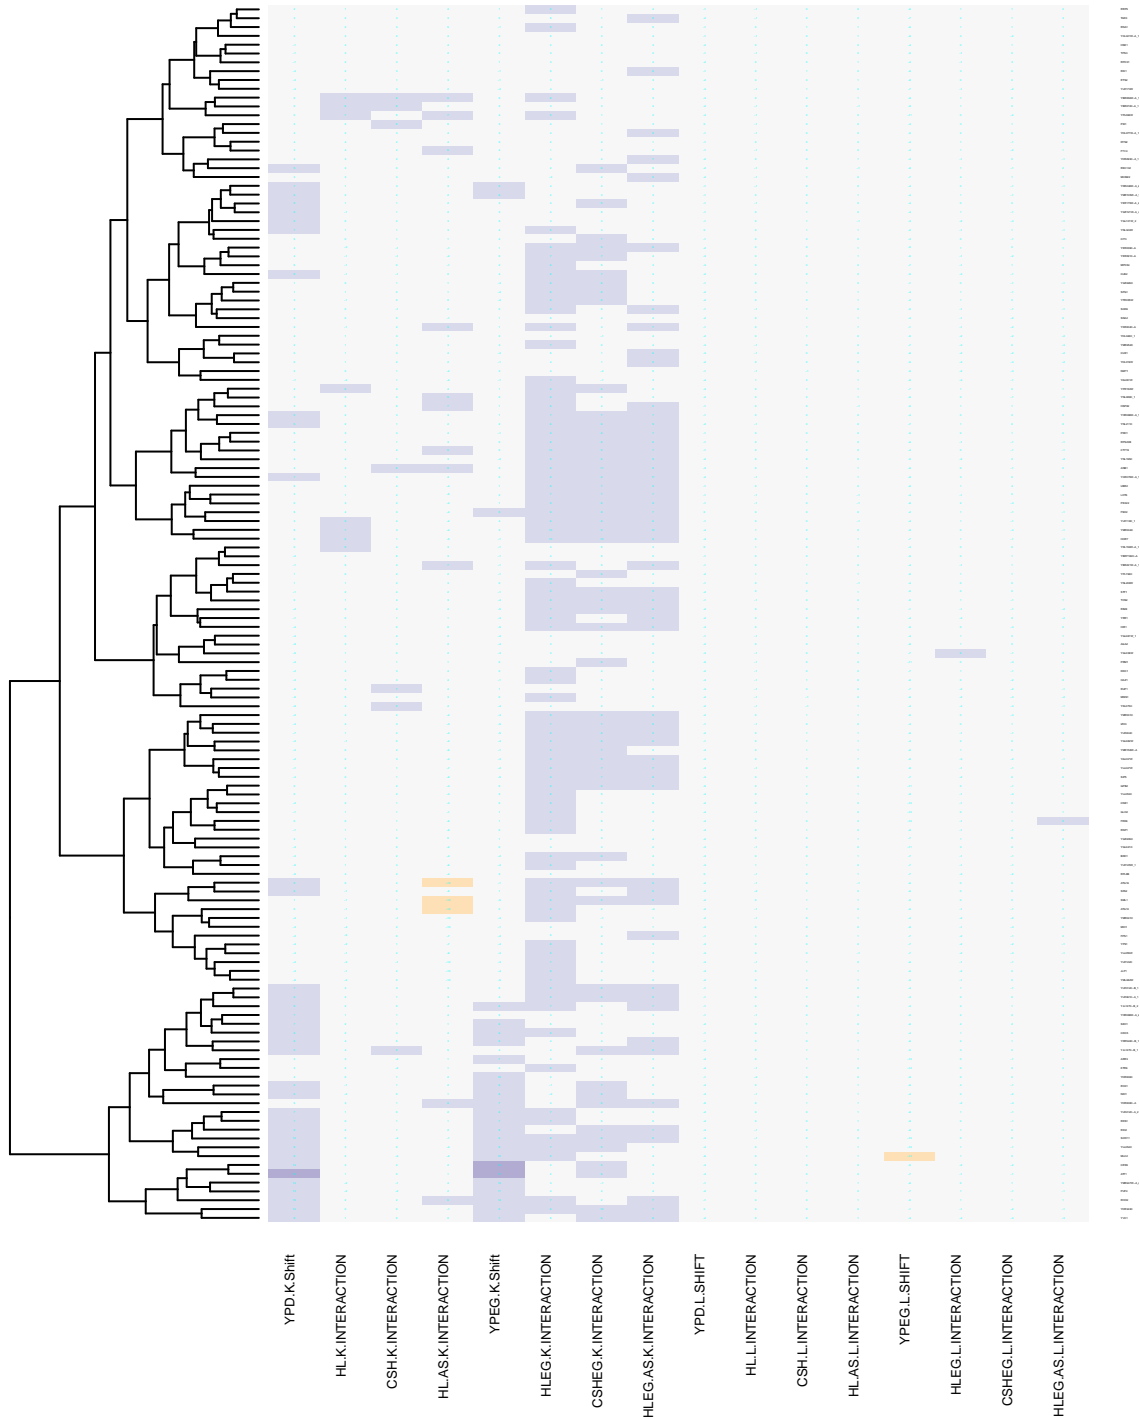

Gene Name

Type of Media

Color Key

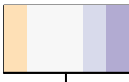

0  
Value

2-0.5-11

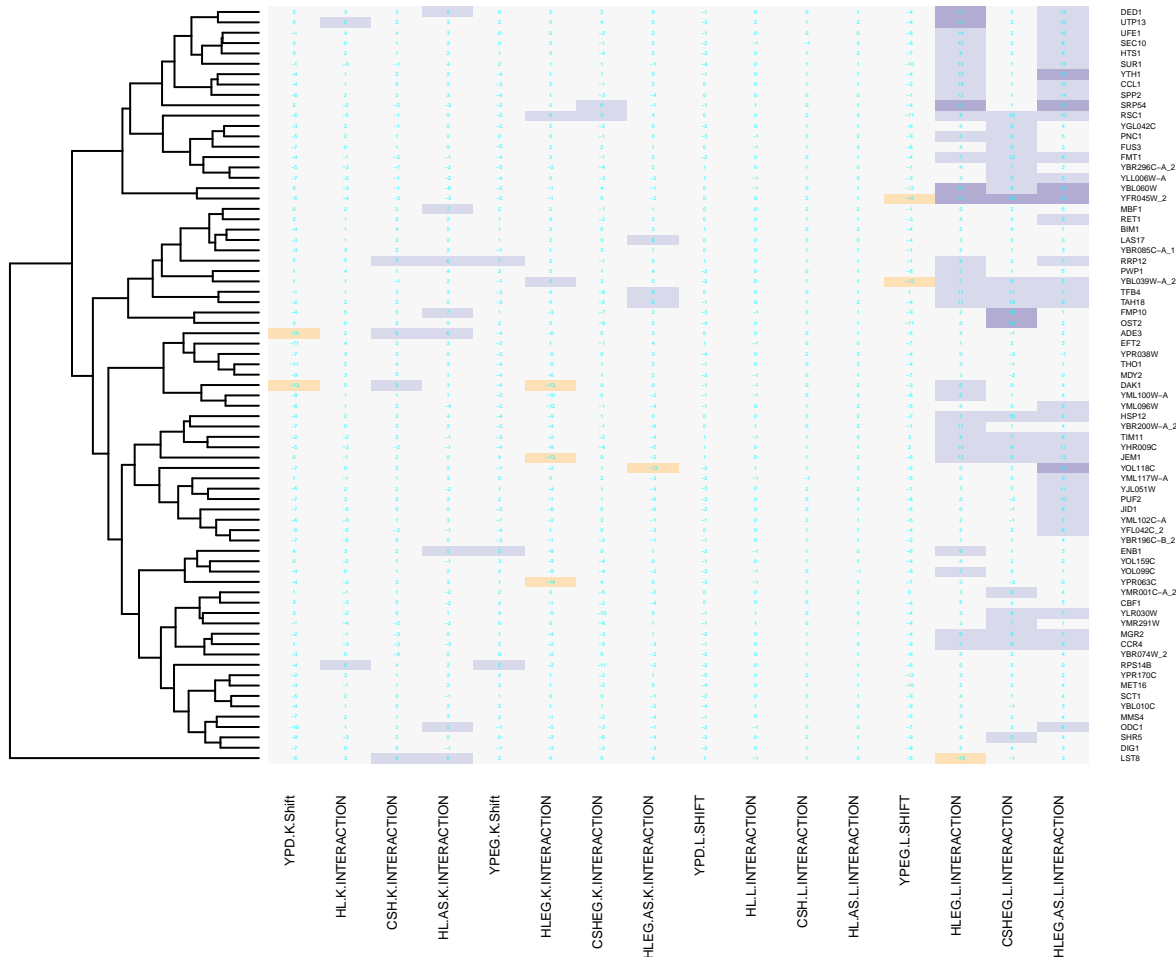

Gene Name

Type of Media

Color Key

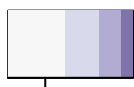

0  
Value

2-0.5-12

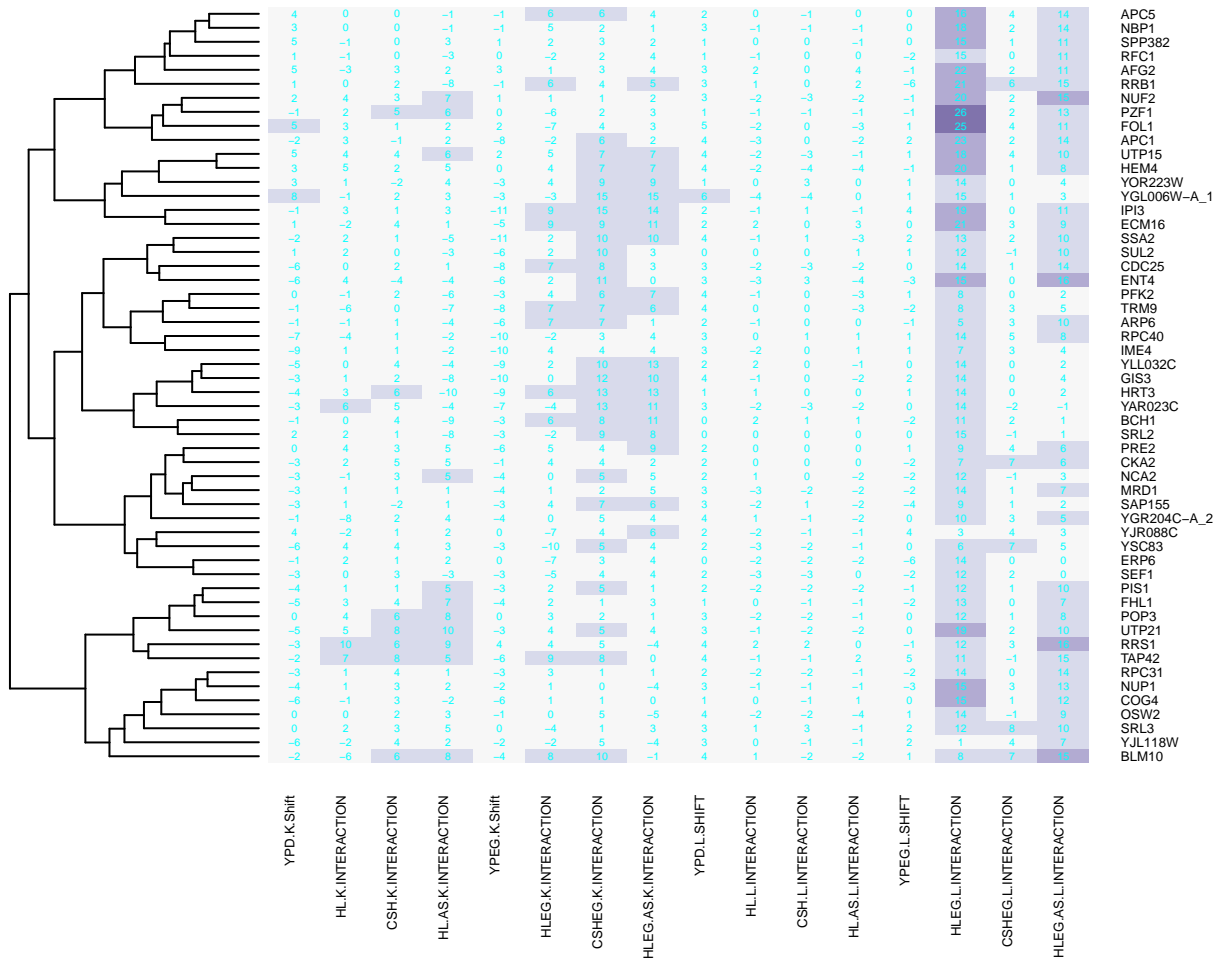

Gene Name

Type of Media

Color Key

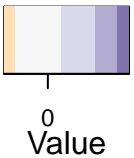

2-0.5-13

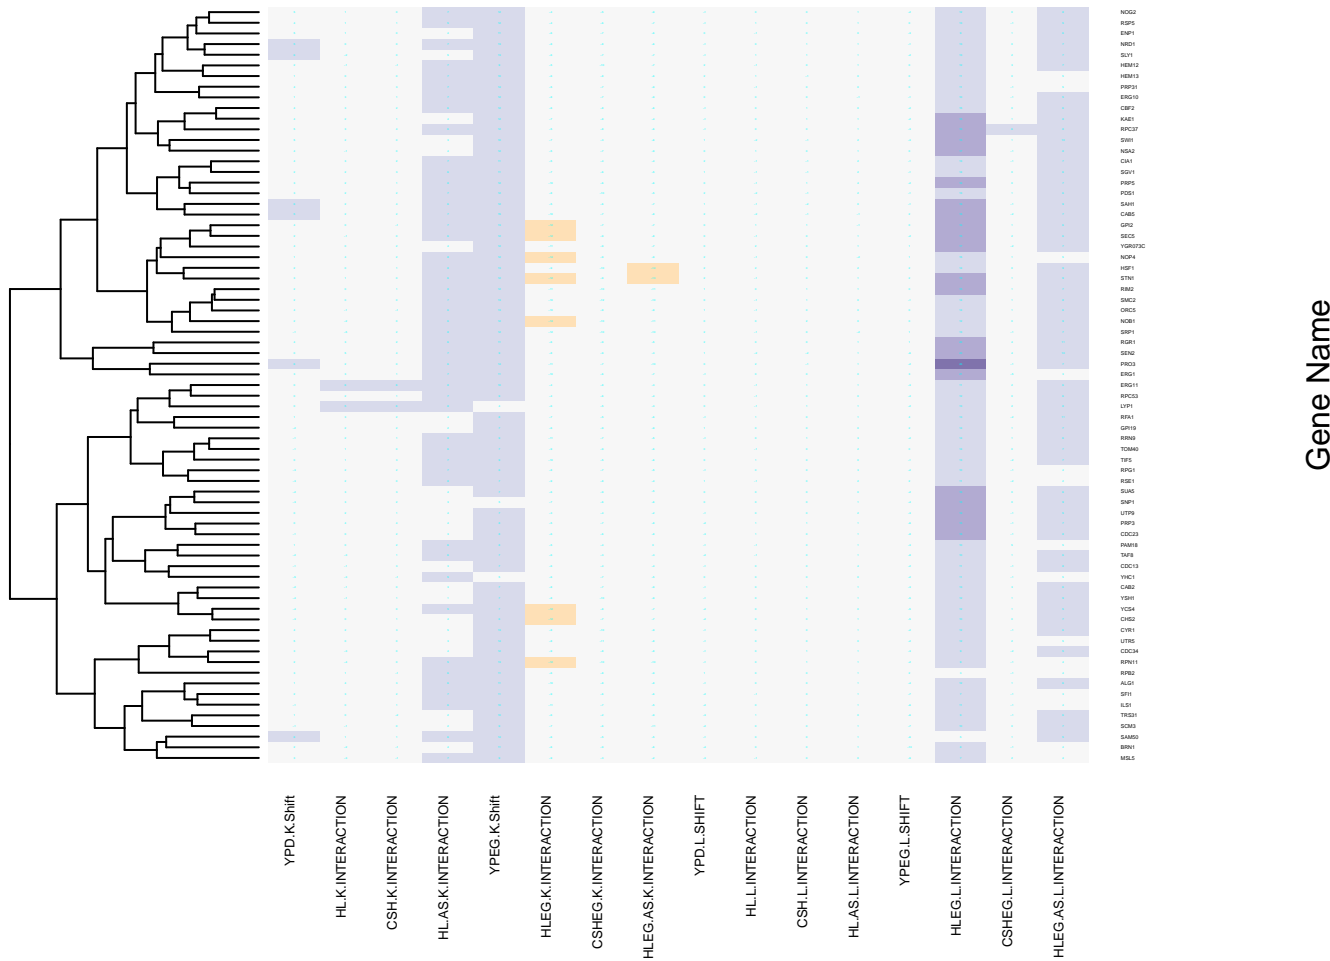

2-0.5-13

Color Key

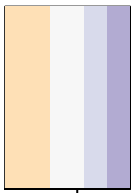

0

Value

2-0.5-14

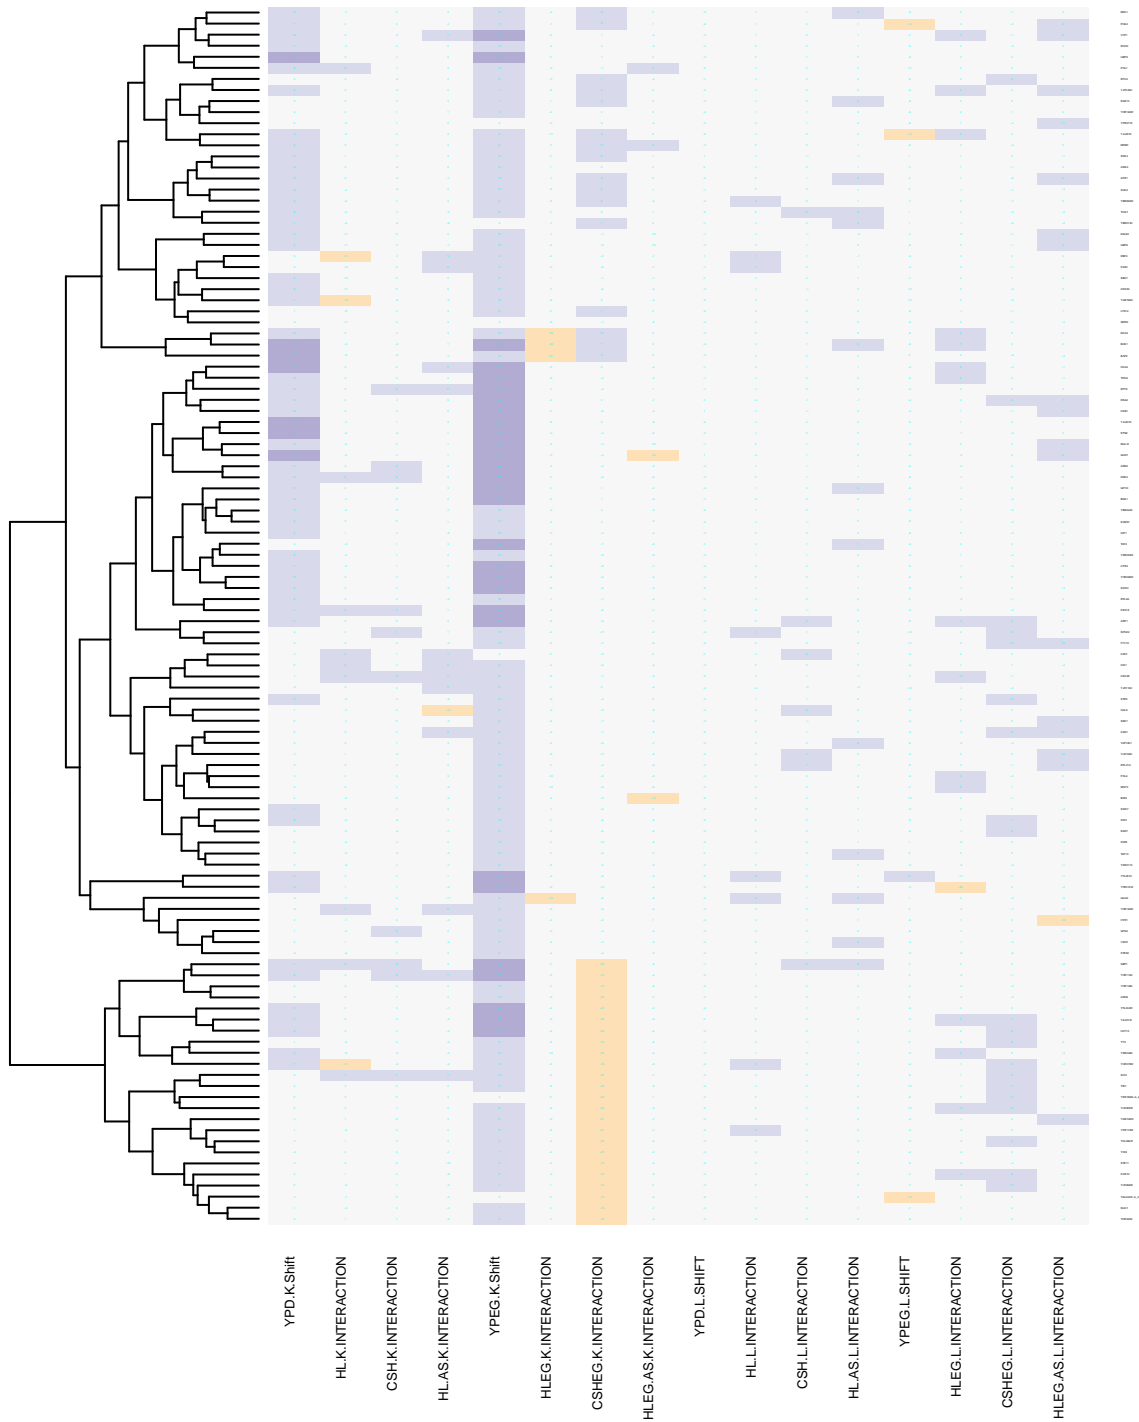

Gene Name

Type of Media

2-0.5-15

Color Key

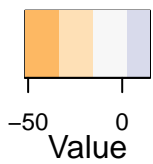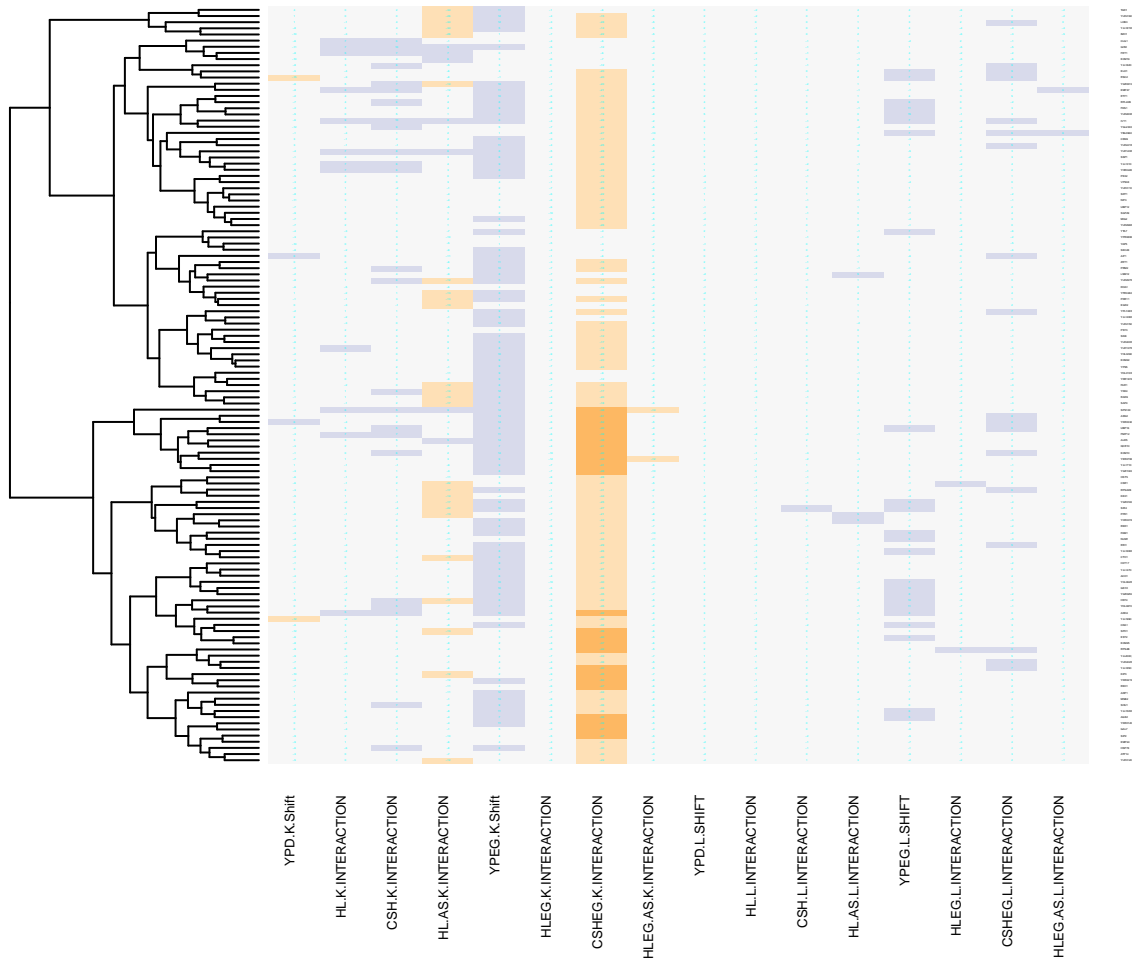

Type of Media

Gene Name

Color Key

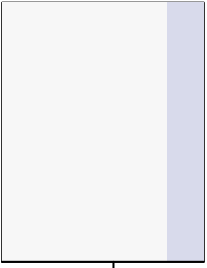

2-0.5-16

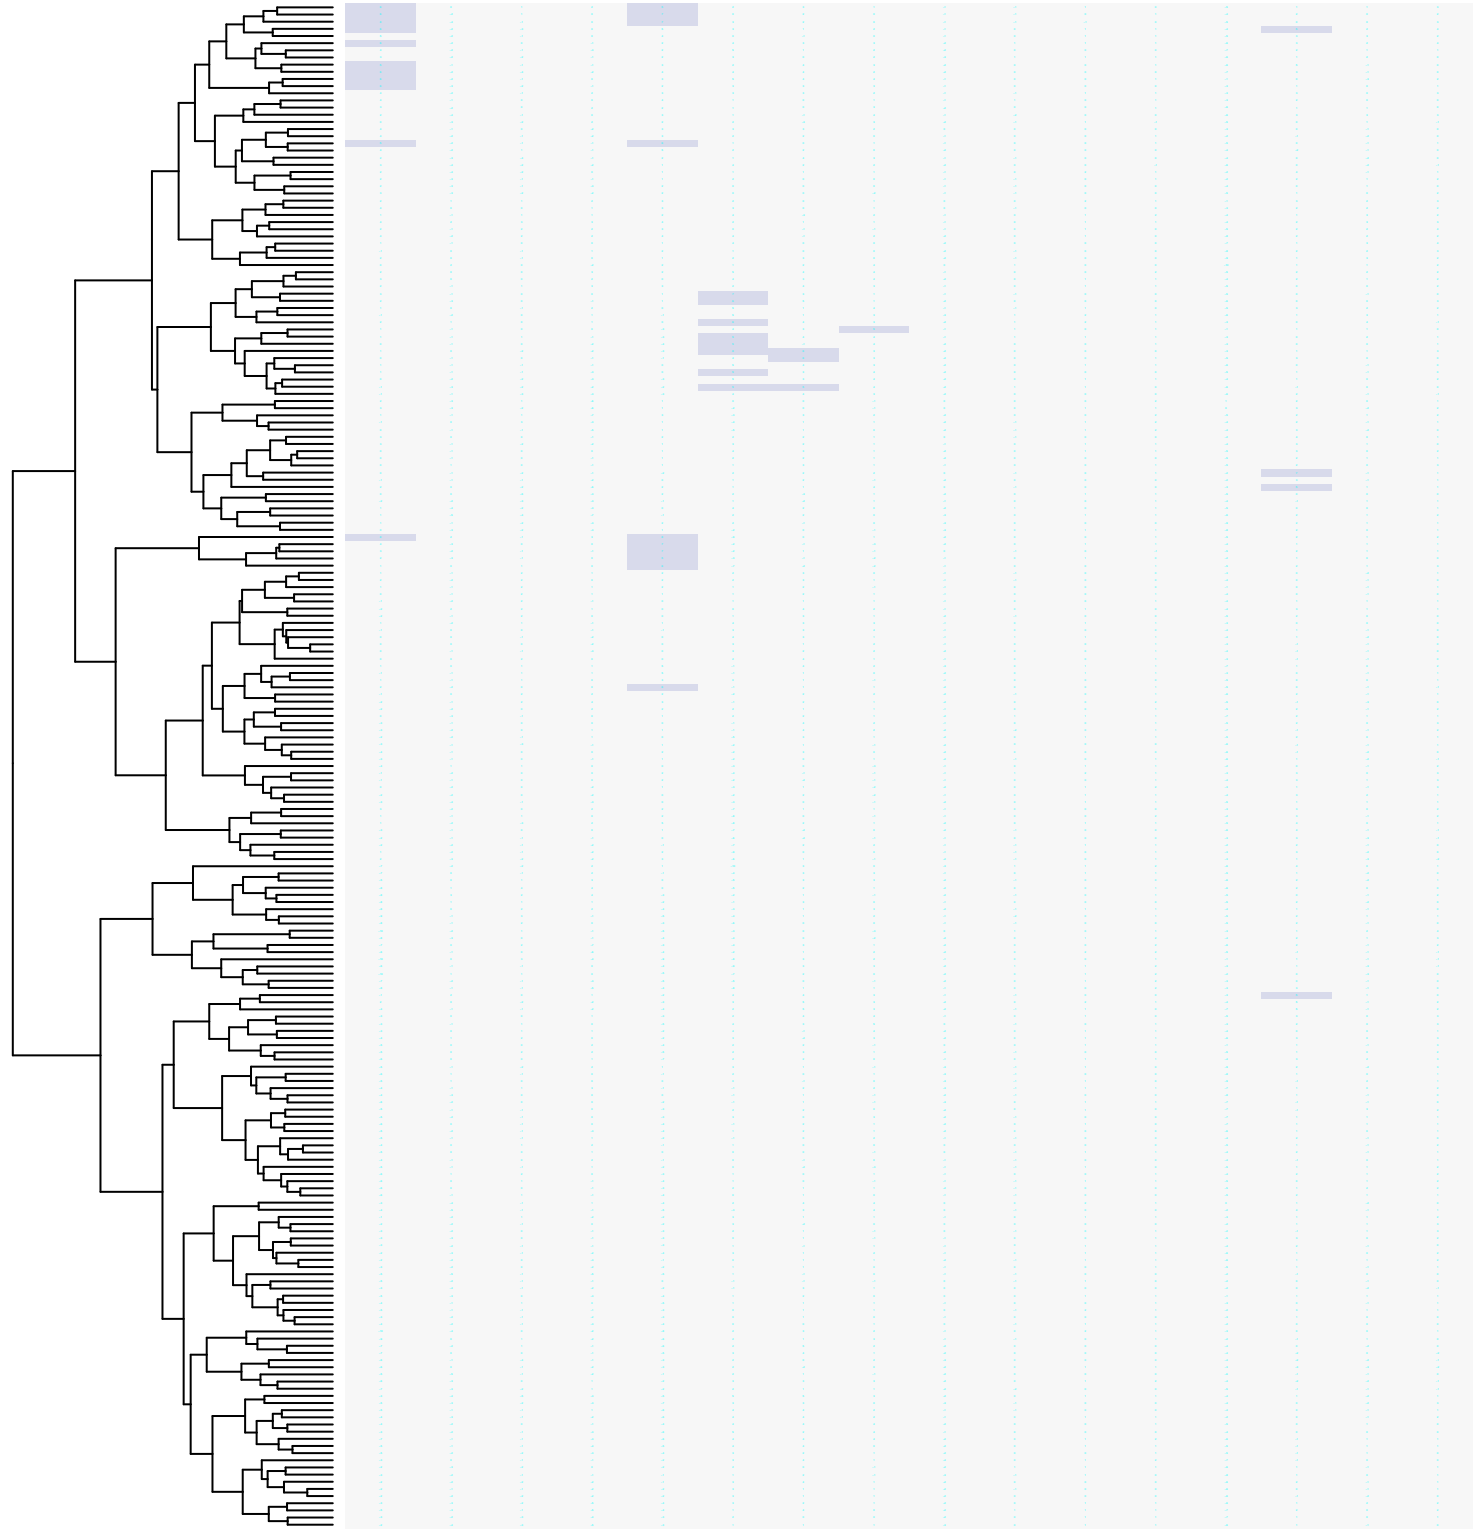

Gene Name

Type of Media

Color Key

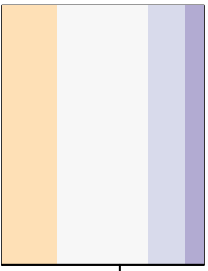

2-0.5-17

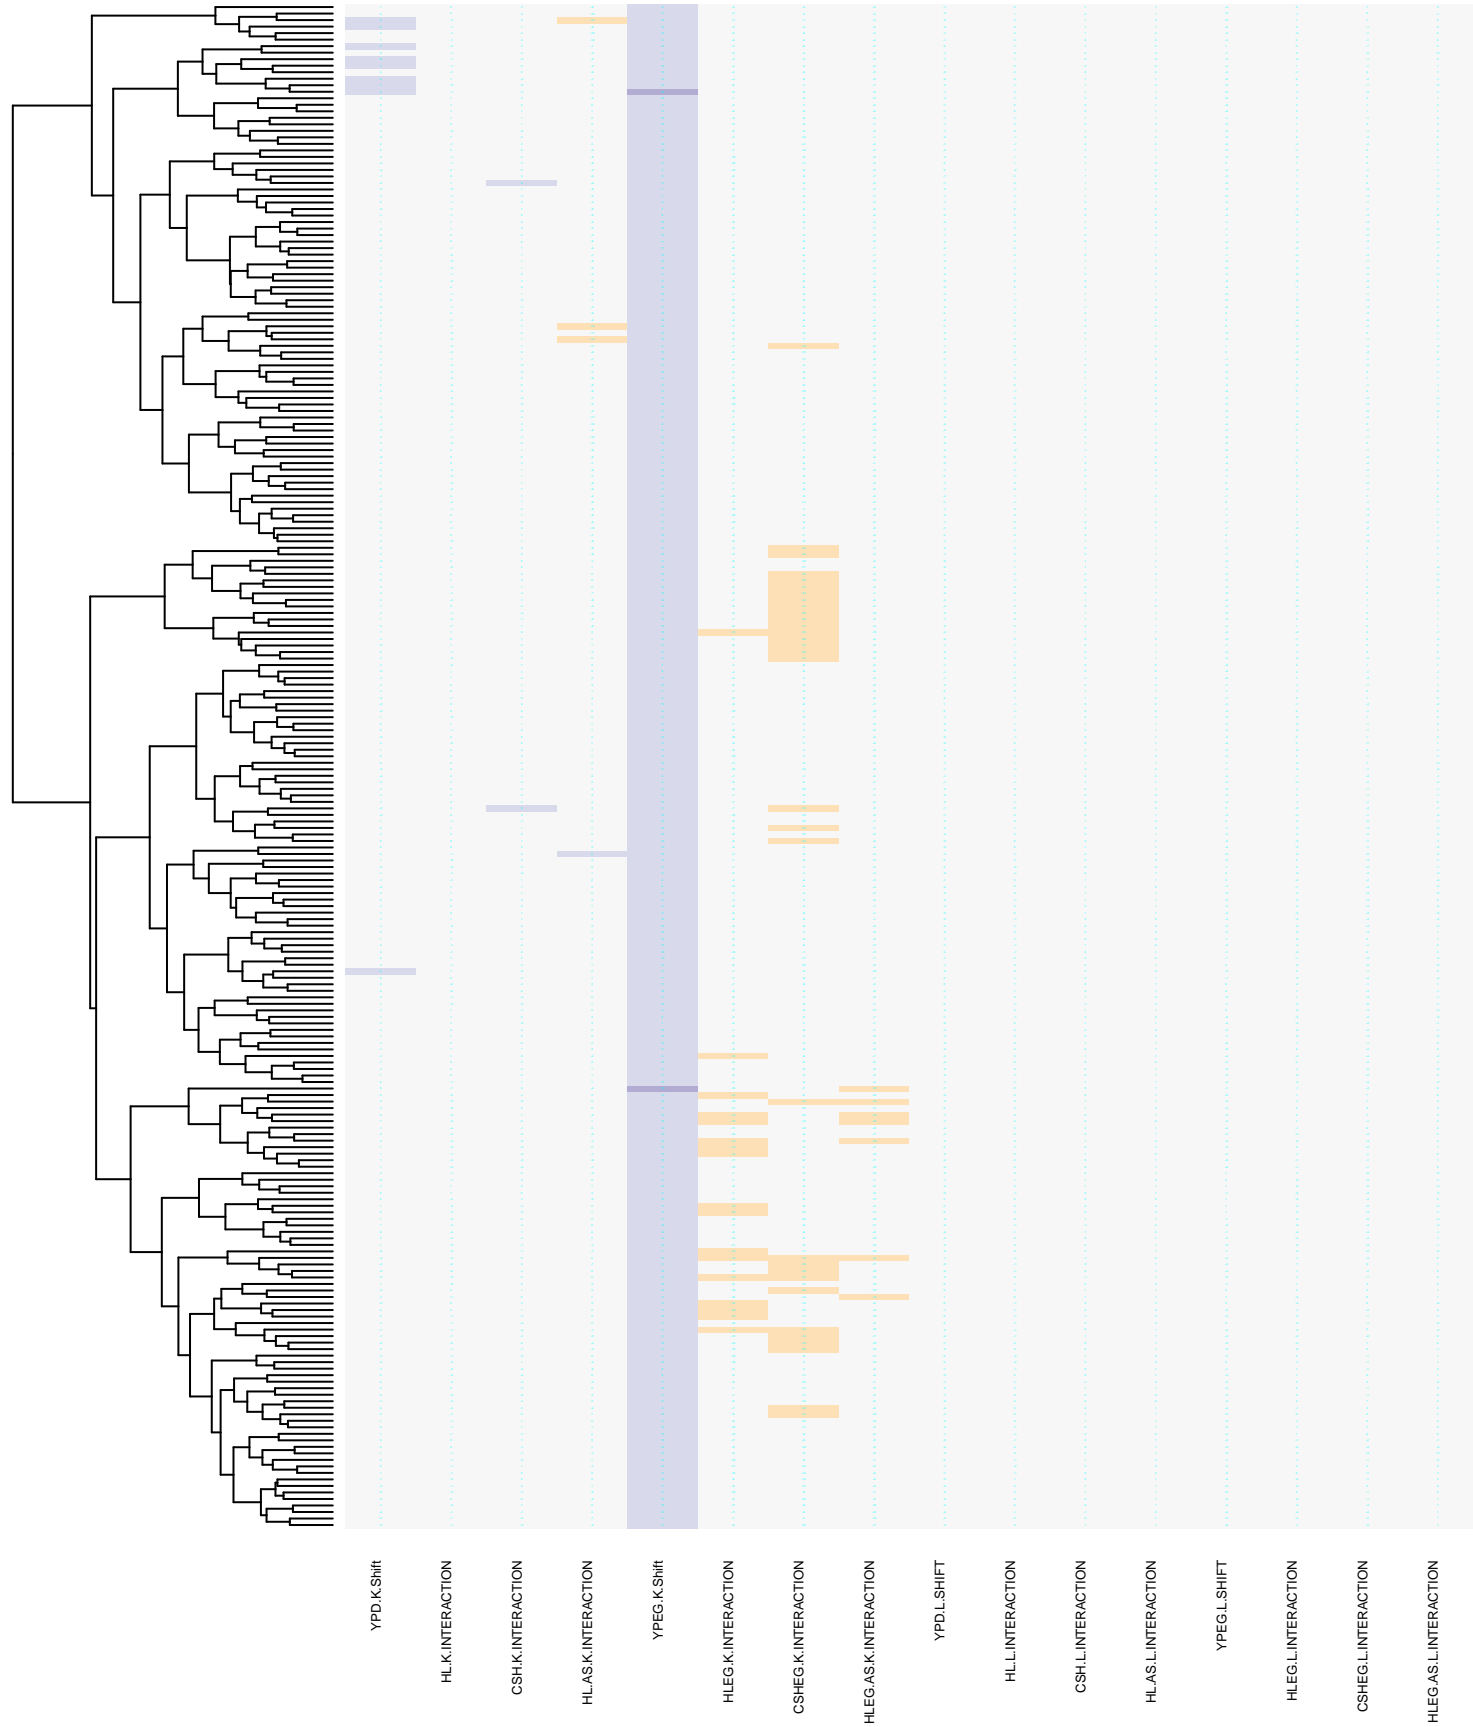

Gene Name

Type of Media

Color Key

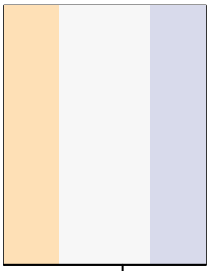

0  
Value

2-0.5-18

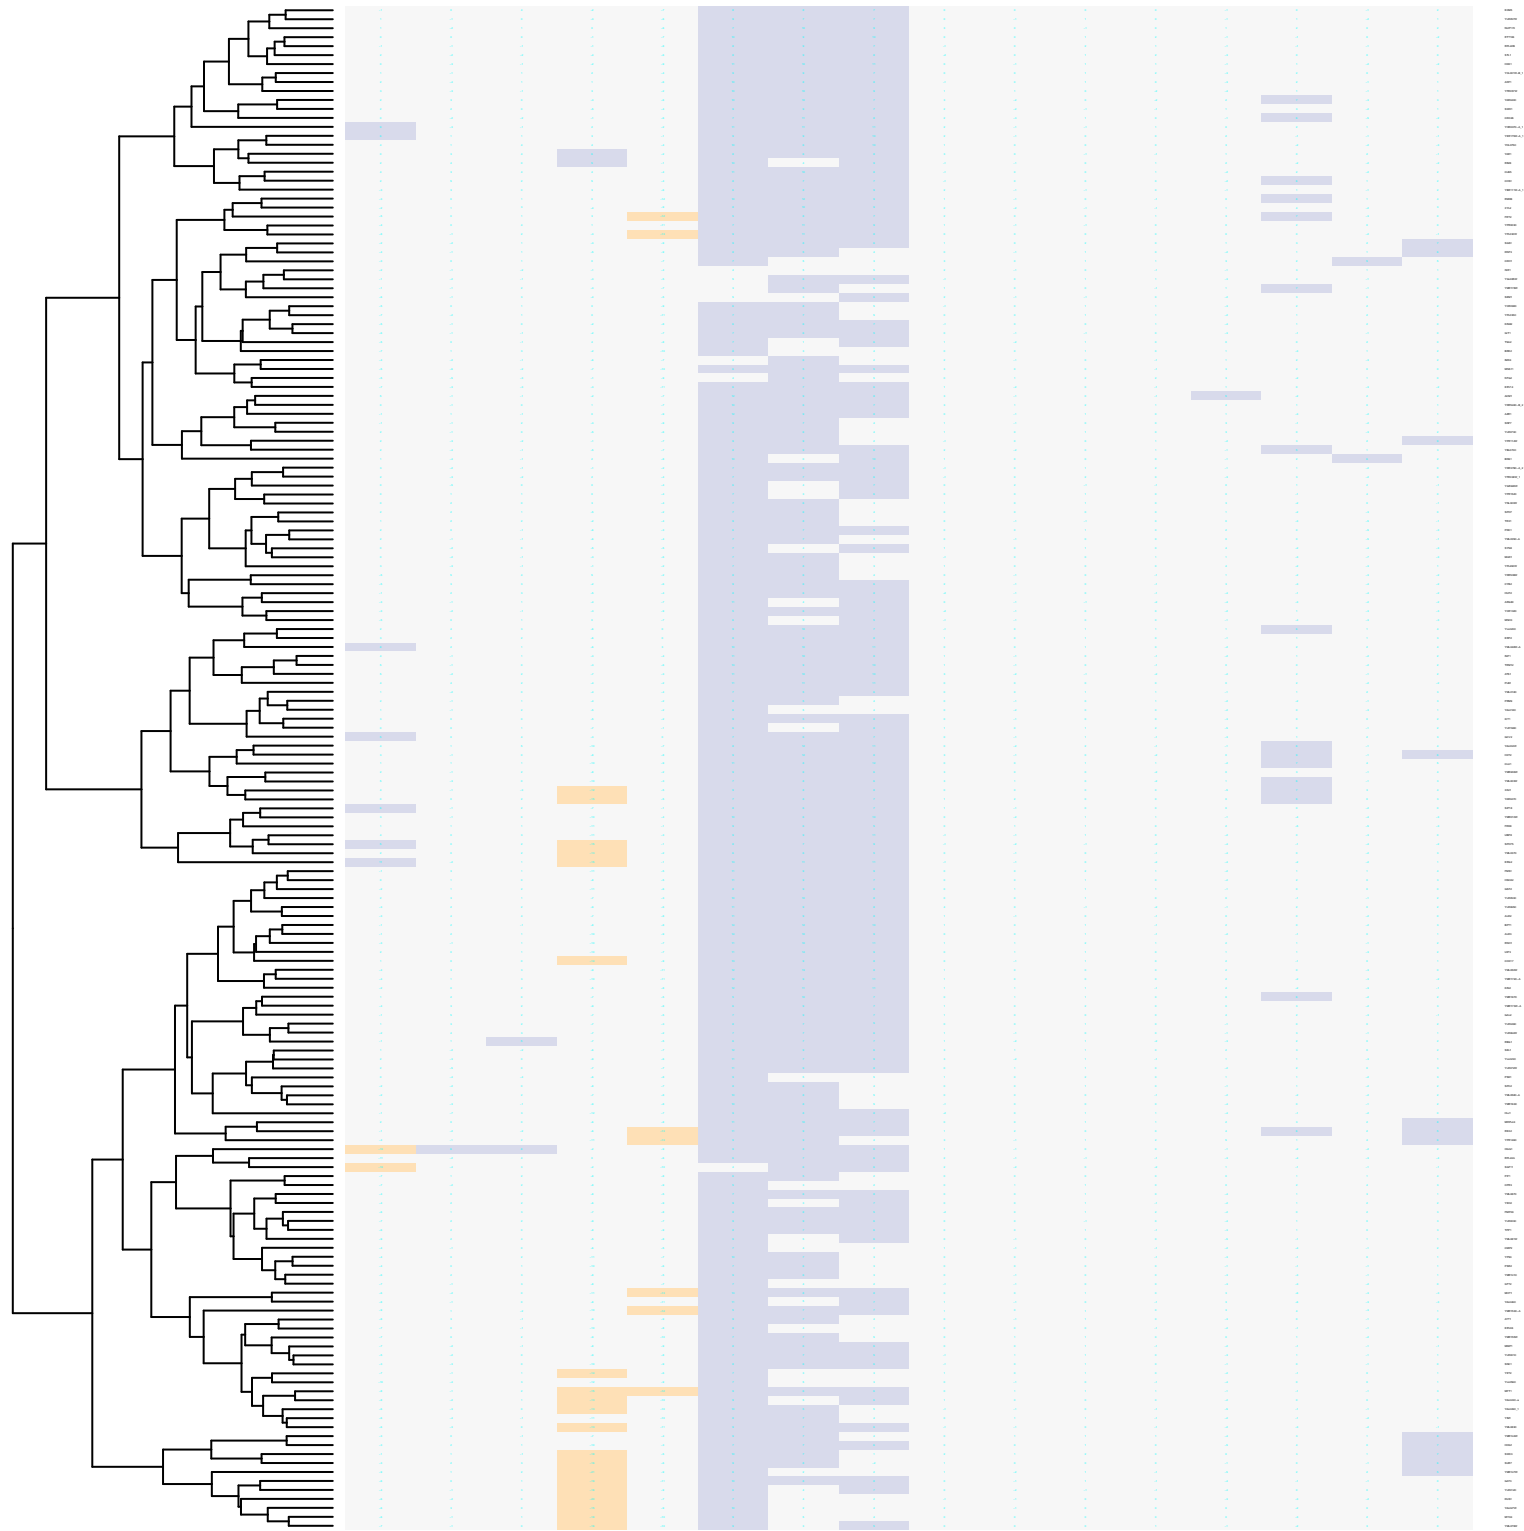

Gene Name

Type of Media

Color Key

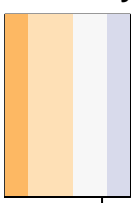

0

Value

2-0.5-19

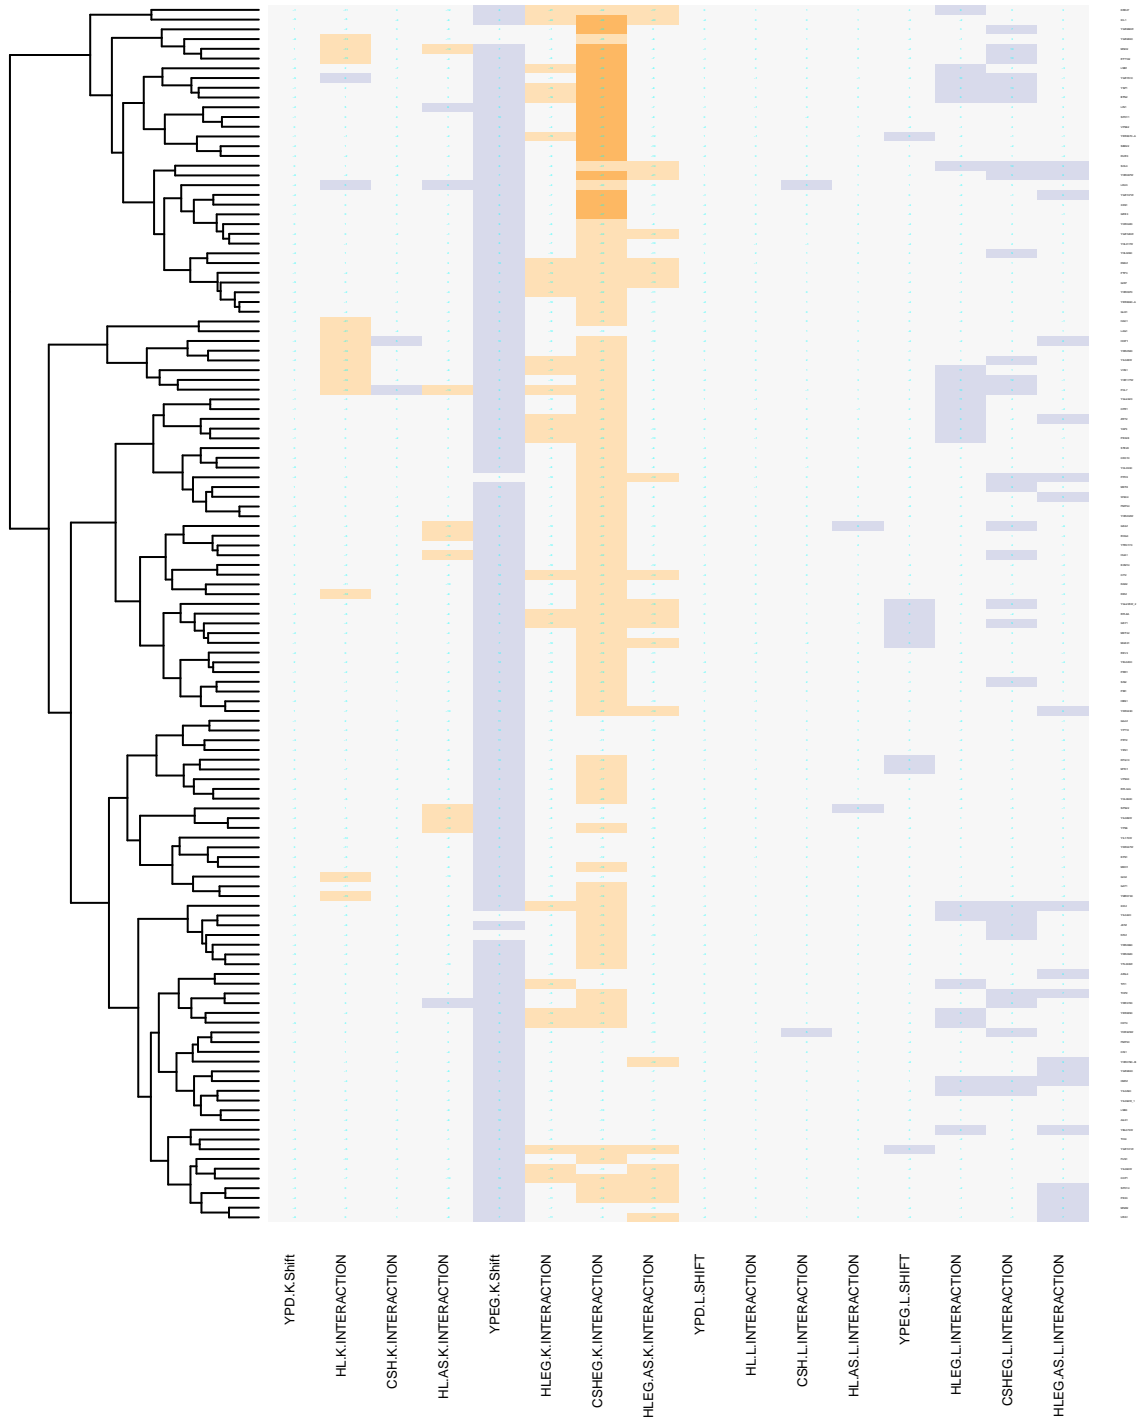

Gene Name

Type of Media

0

**2-0.5-2**

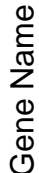

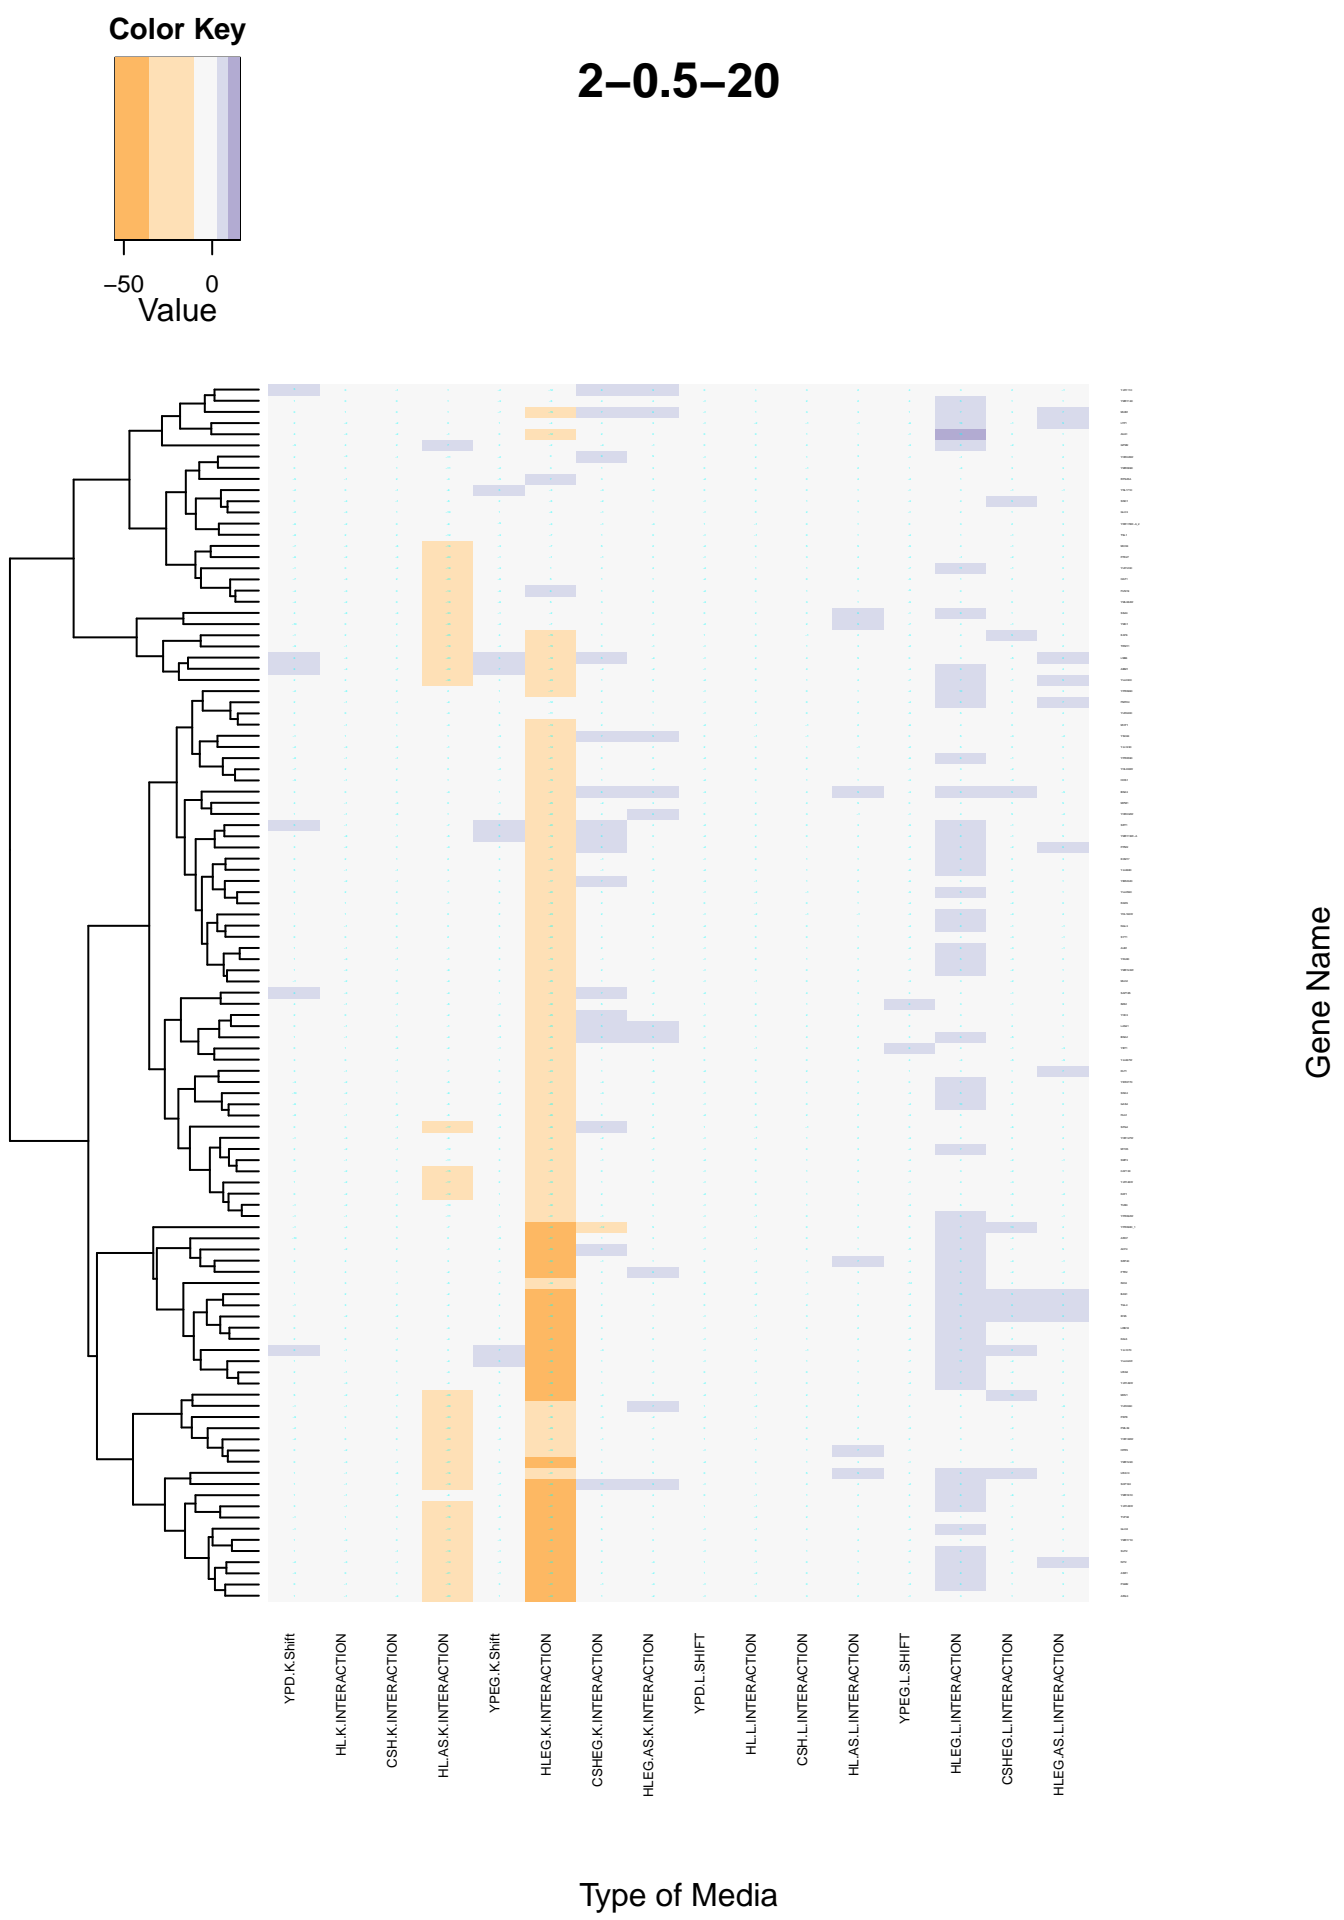



C

**2-0.5-21**

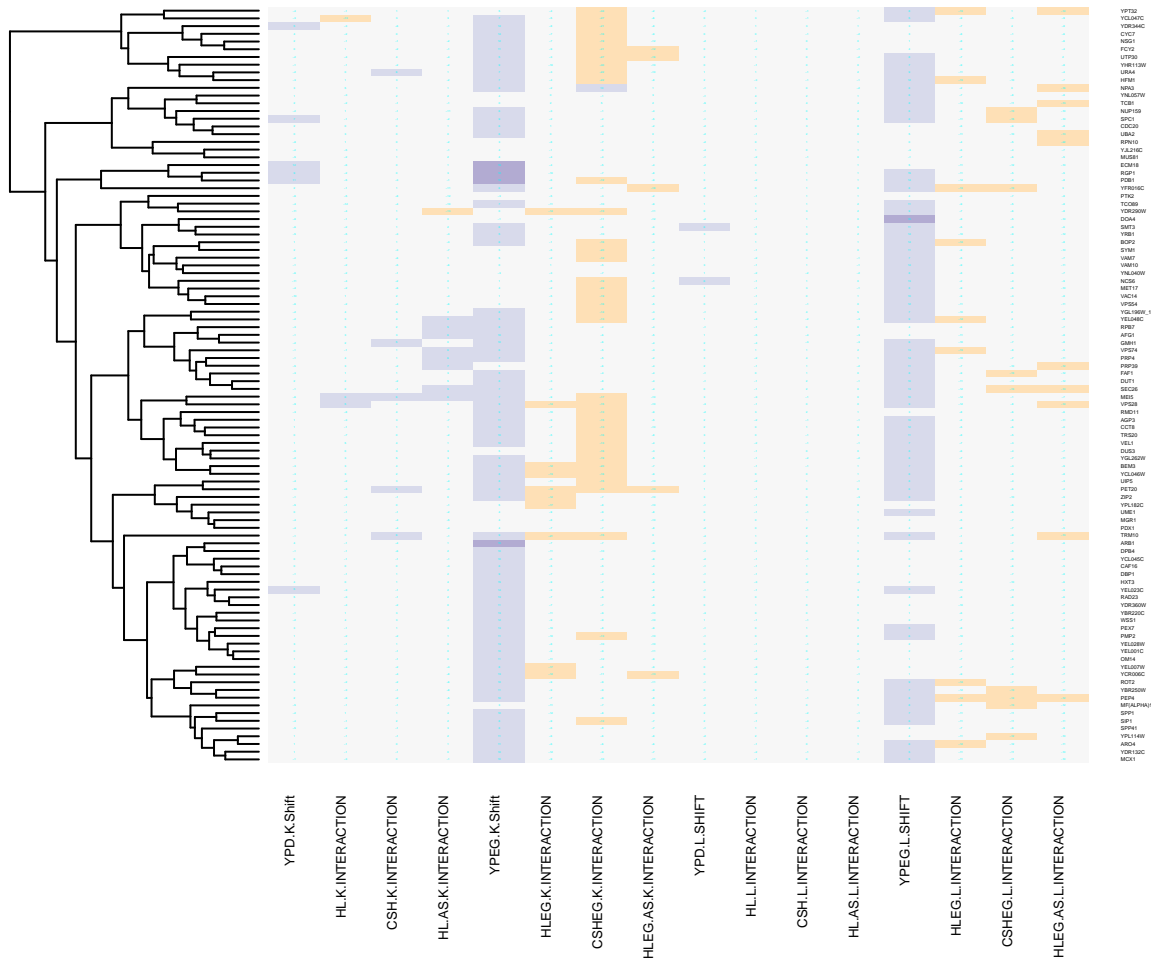

Gene Name

## Type of Media

Color Key

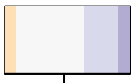

0  
Value

2-0.5-22

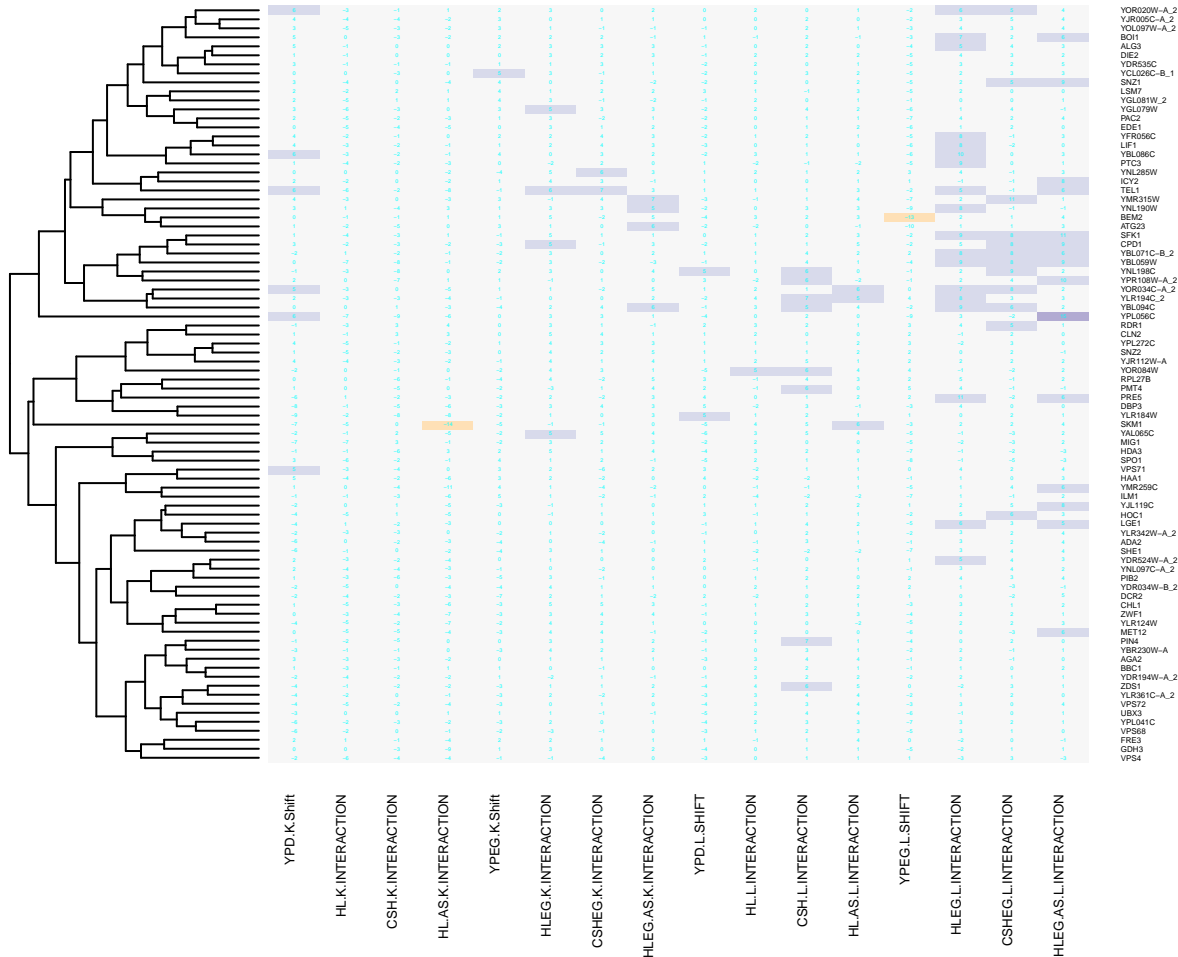

Gene Name

Type of Media

Color Key

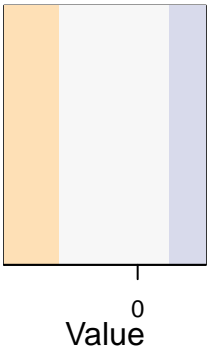

2-0.5-23

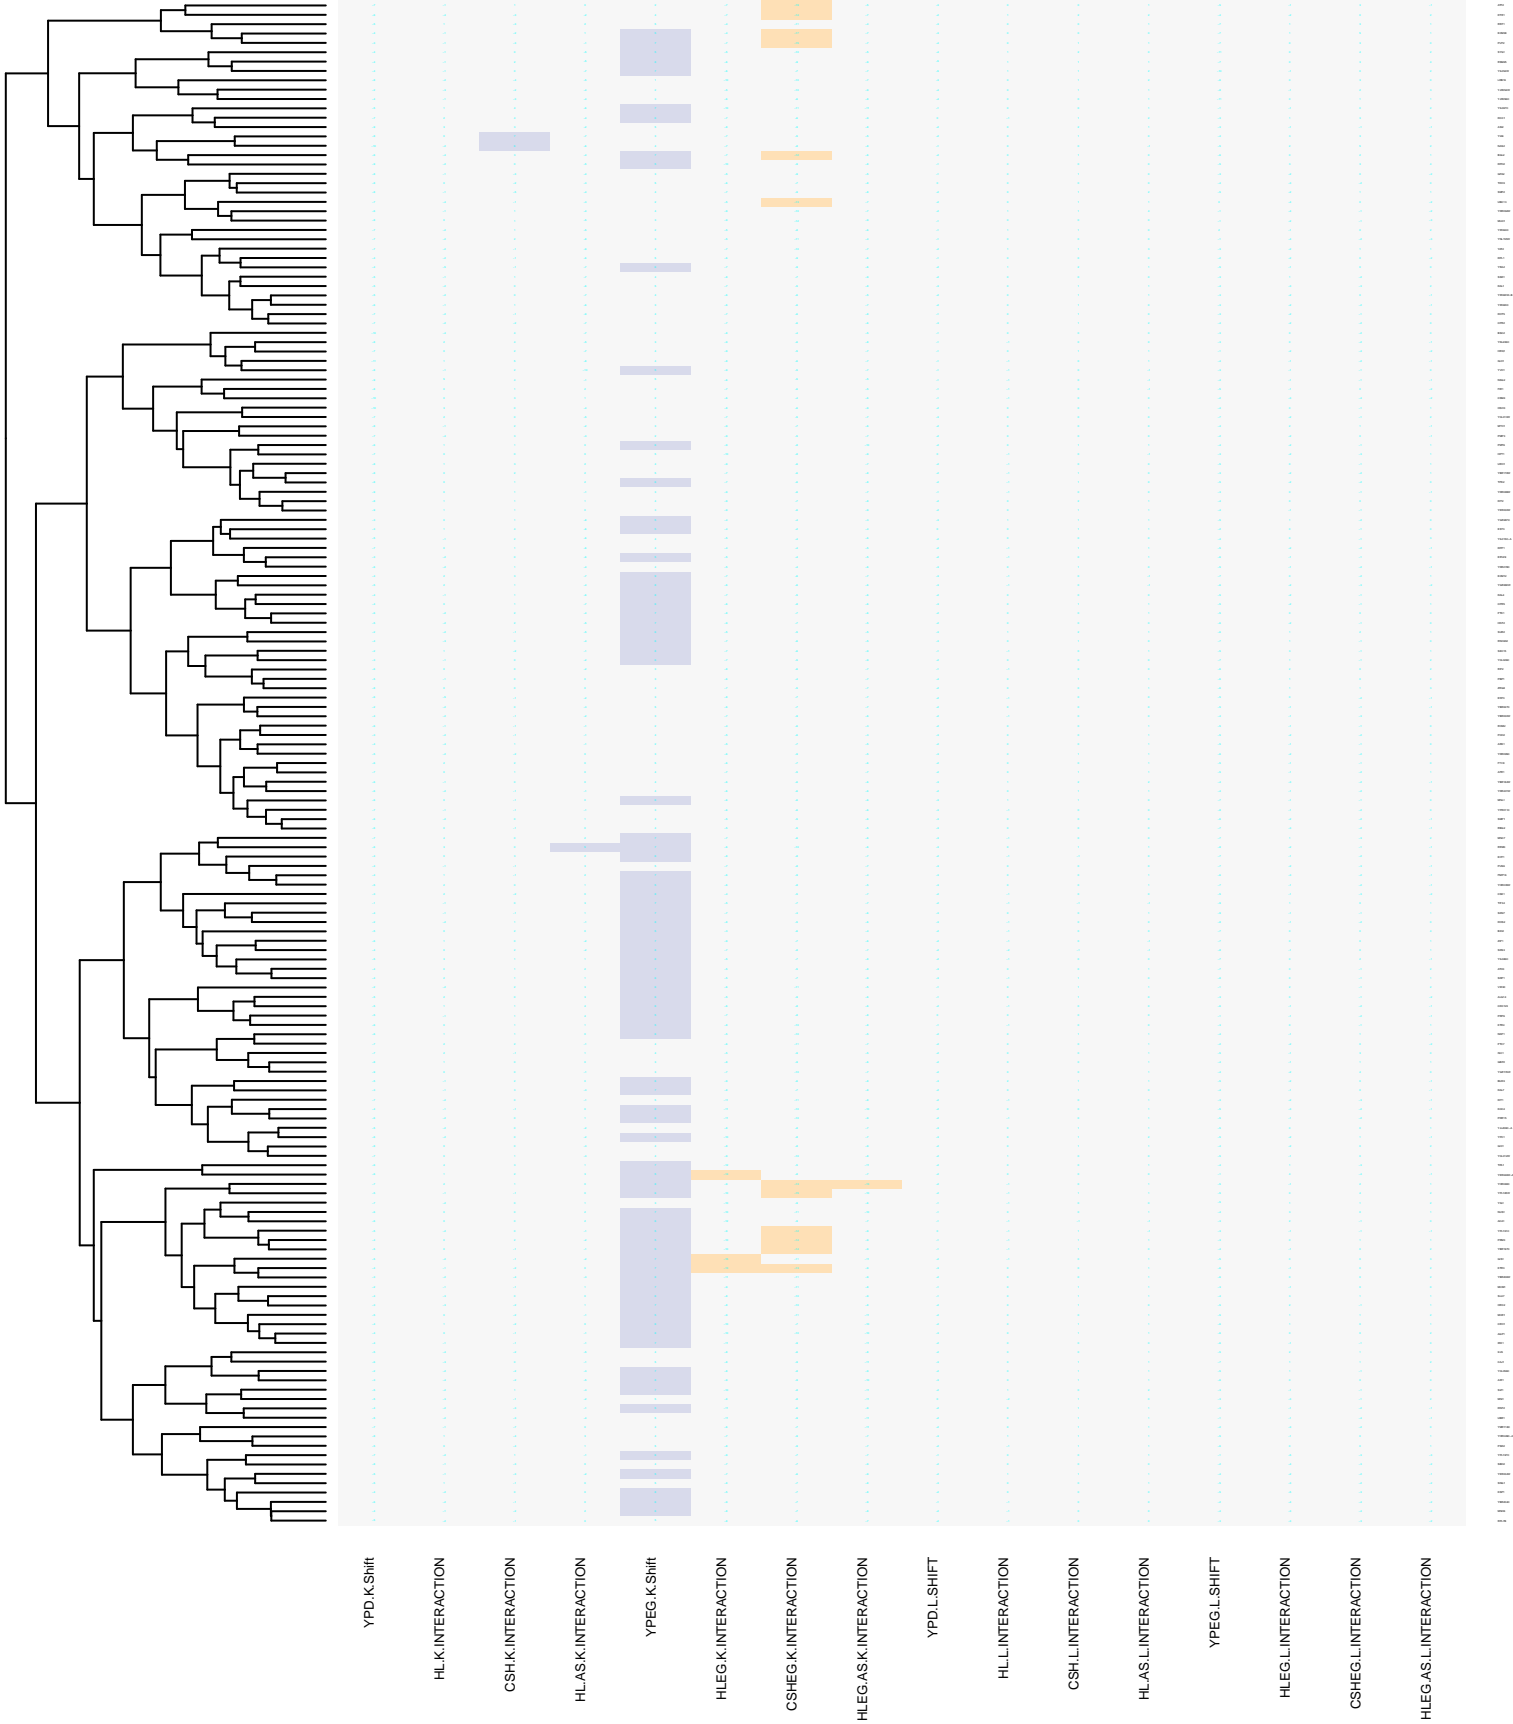

Type of Media

Color Key

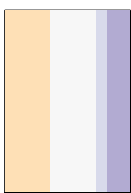

0

Value

2-0.5-24

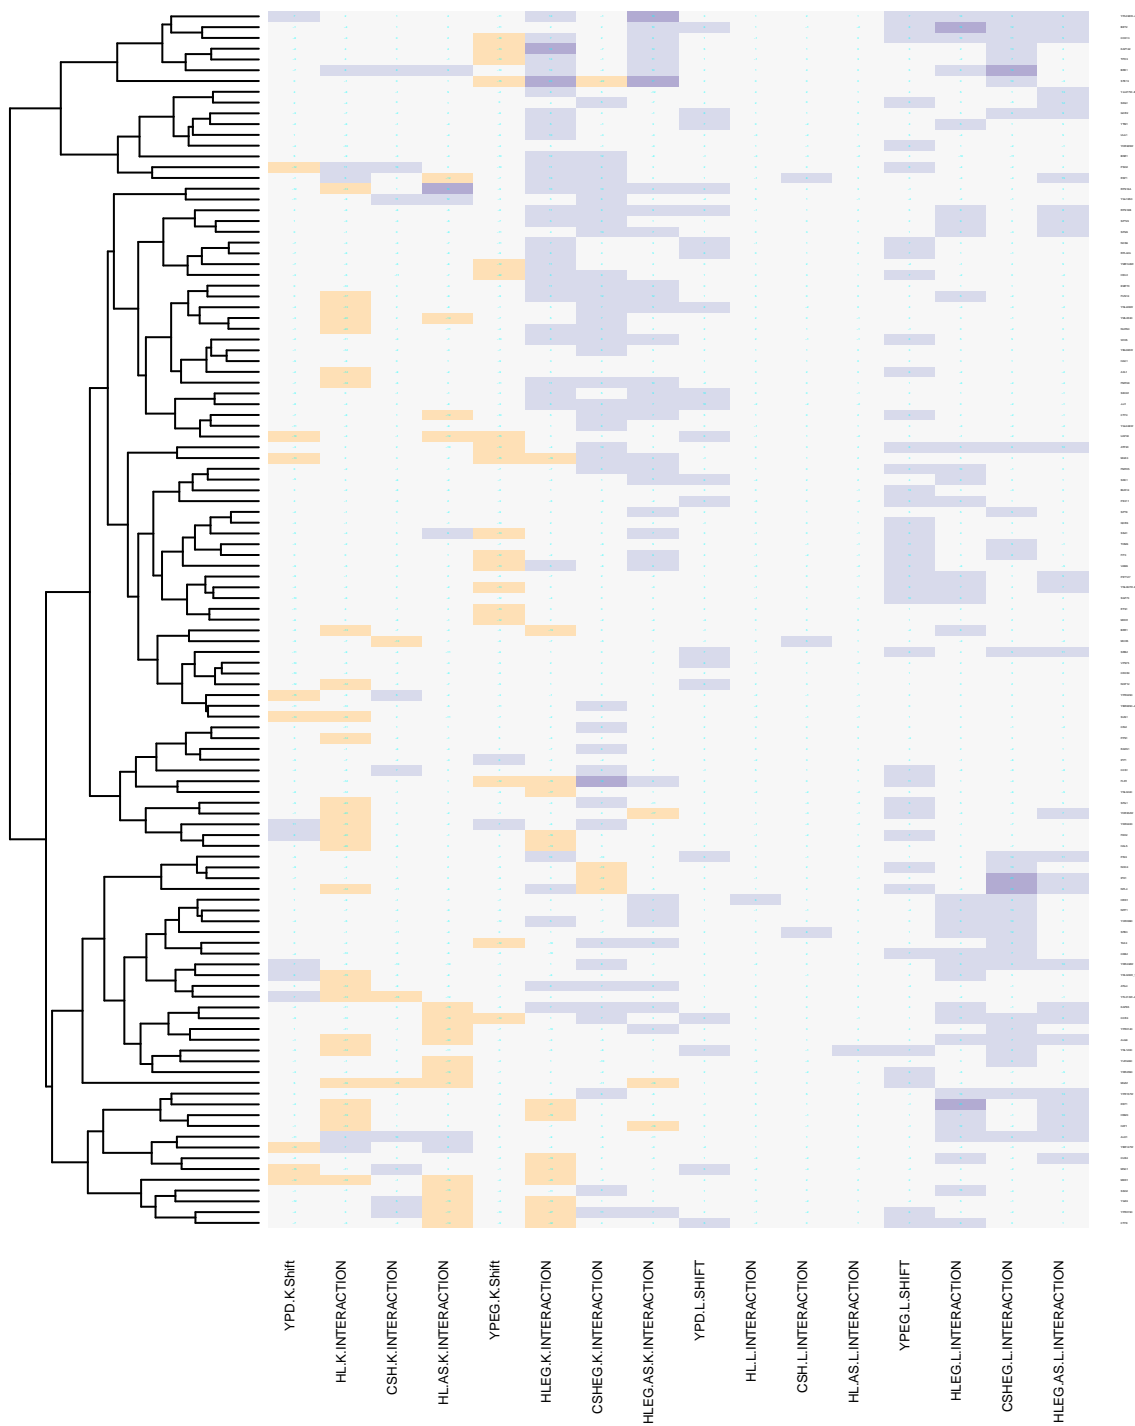

Gene Name

Type of Media

Color Key

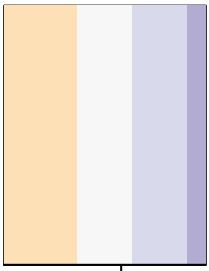

Value

2-0.5-25

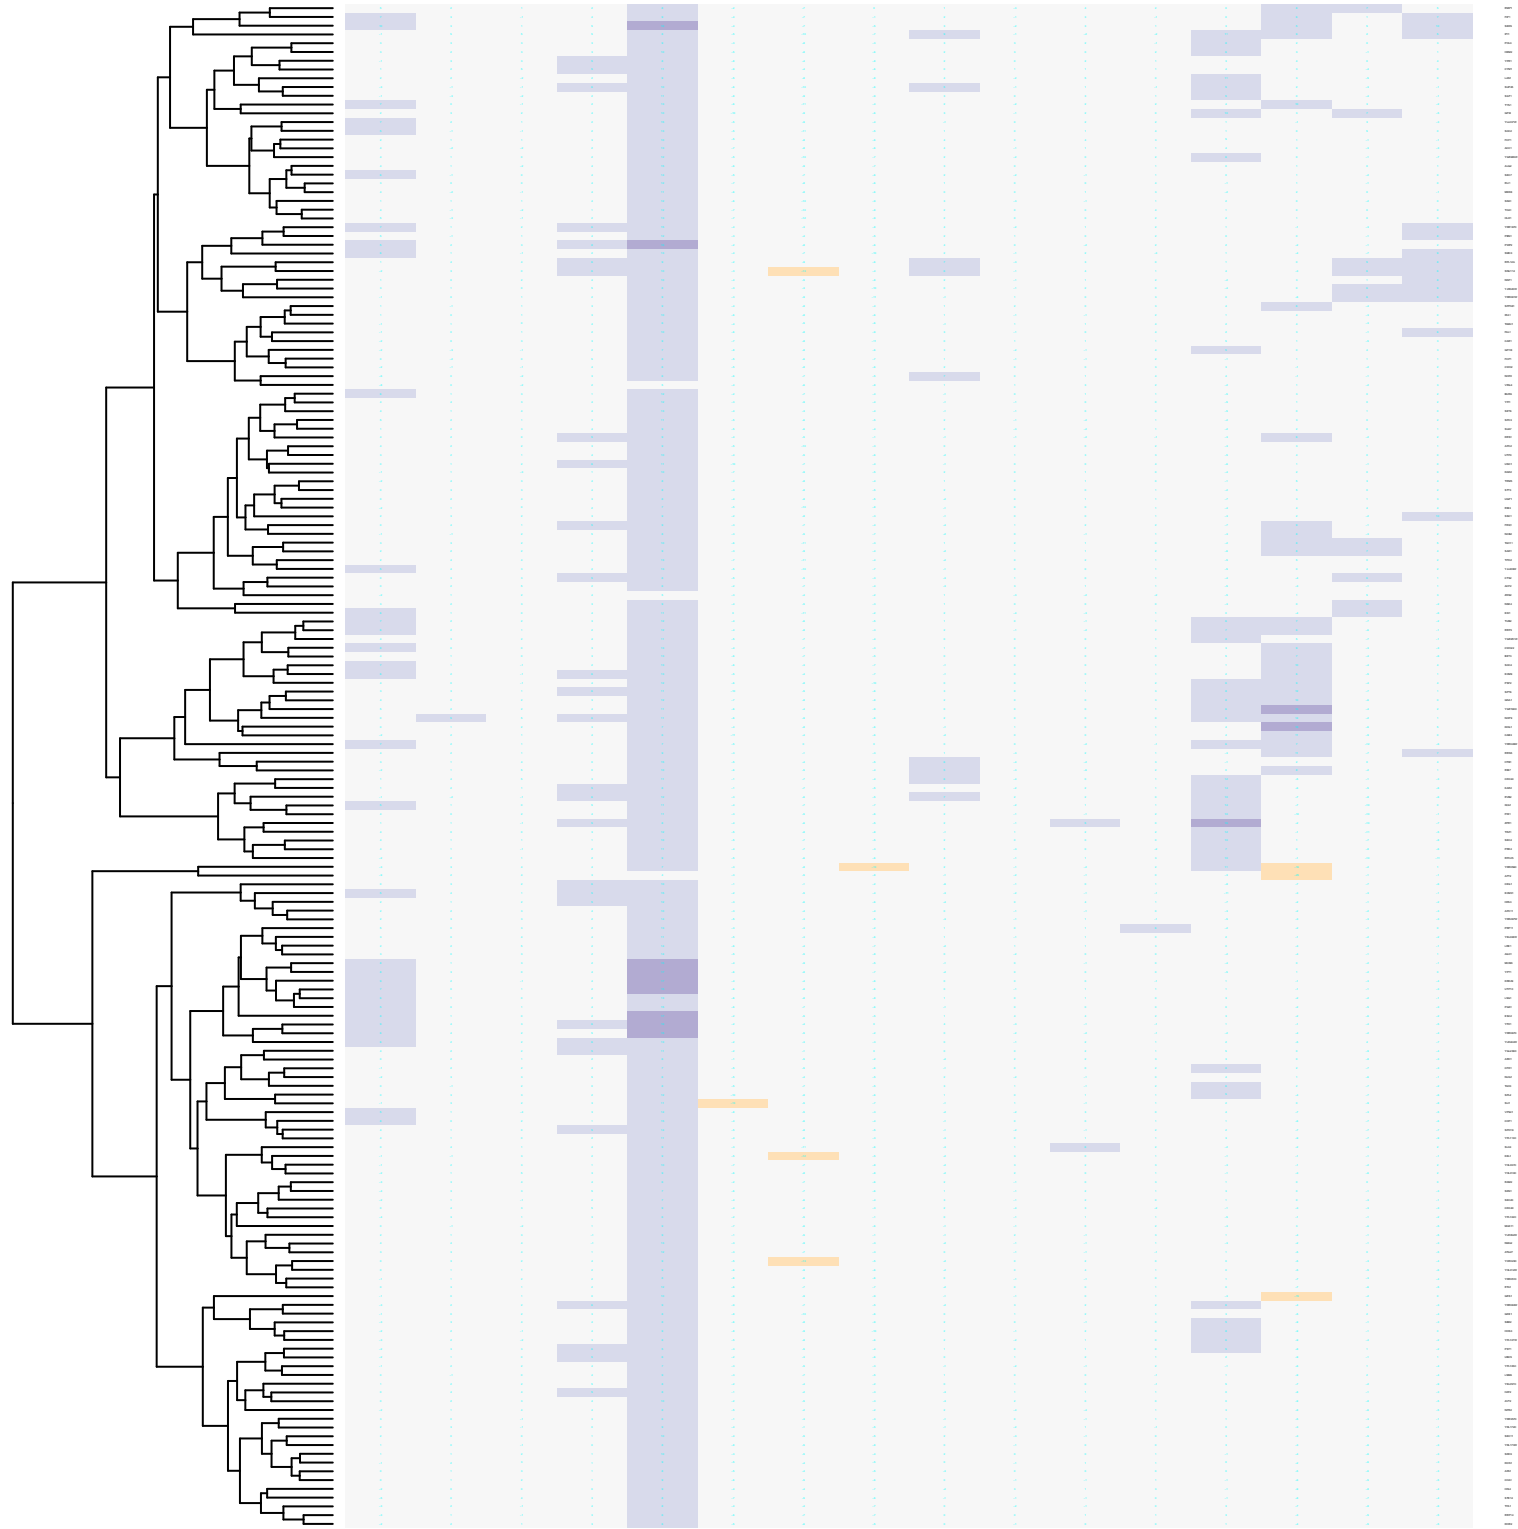

Gene Name

Type of Media

Color Key

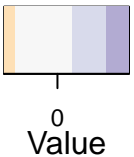

2-0.5-26

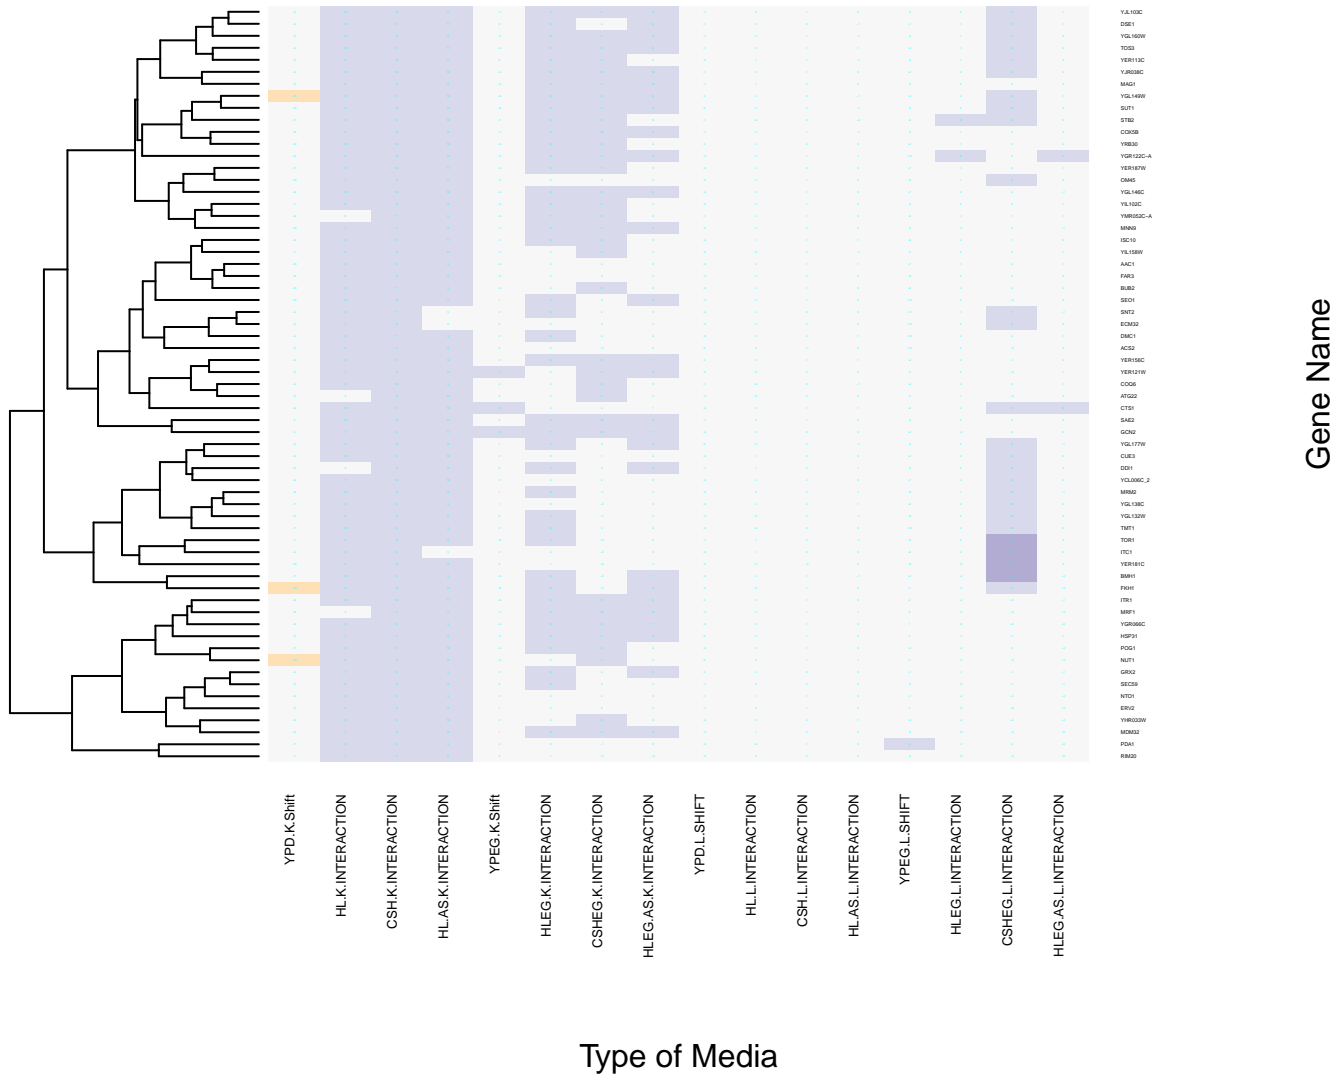

Color Key

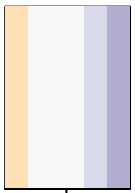

0  
Value

2-0.5-27

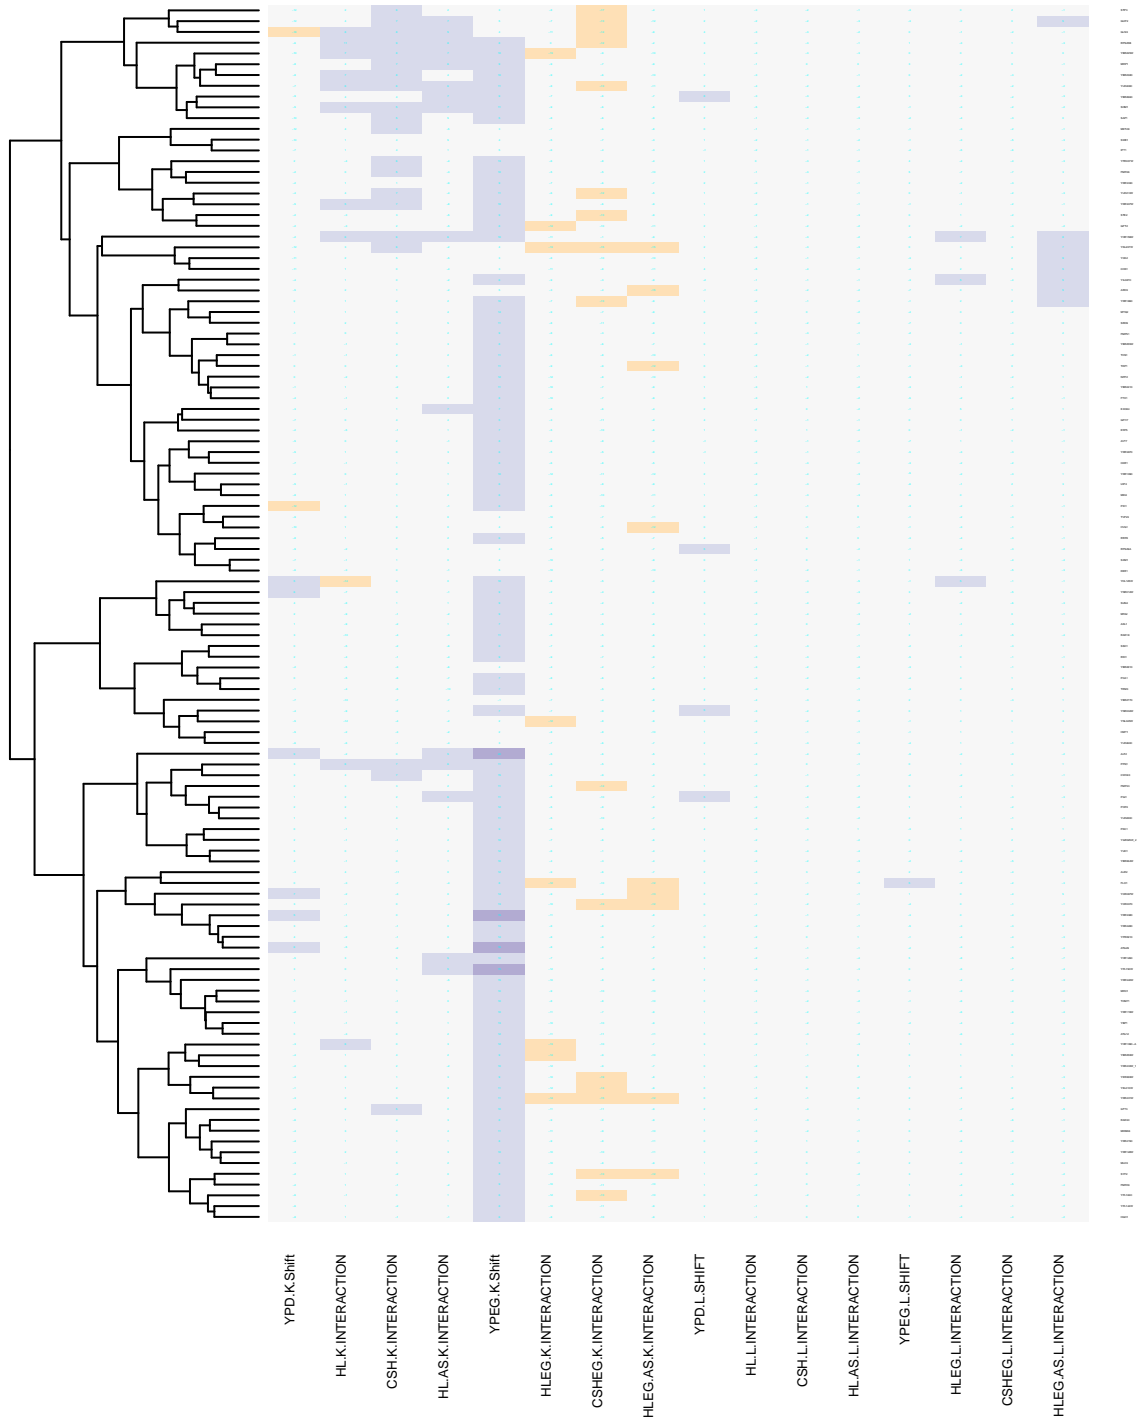

Gene Name

Type of Media

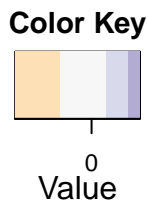

2-0.5-28

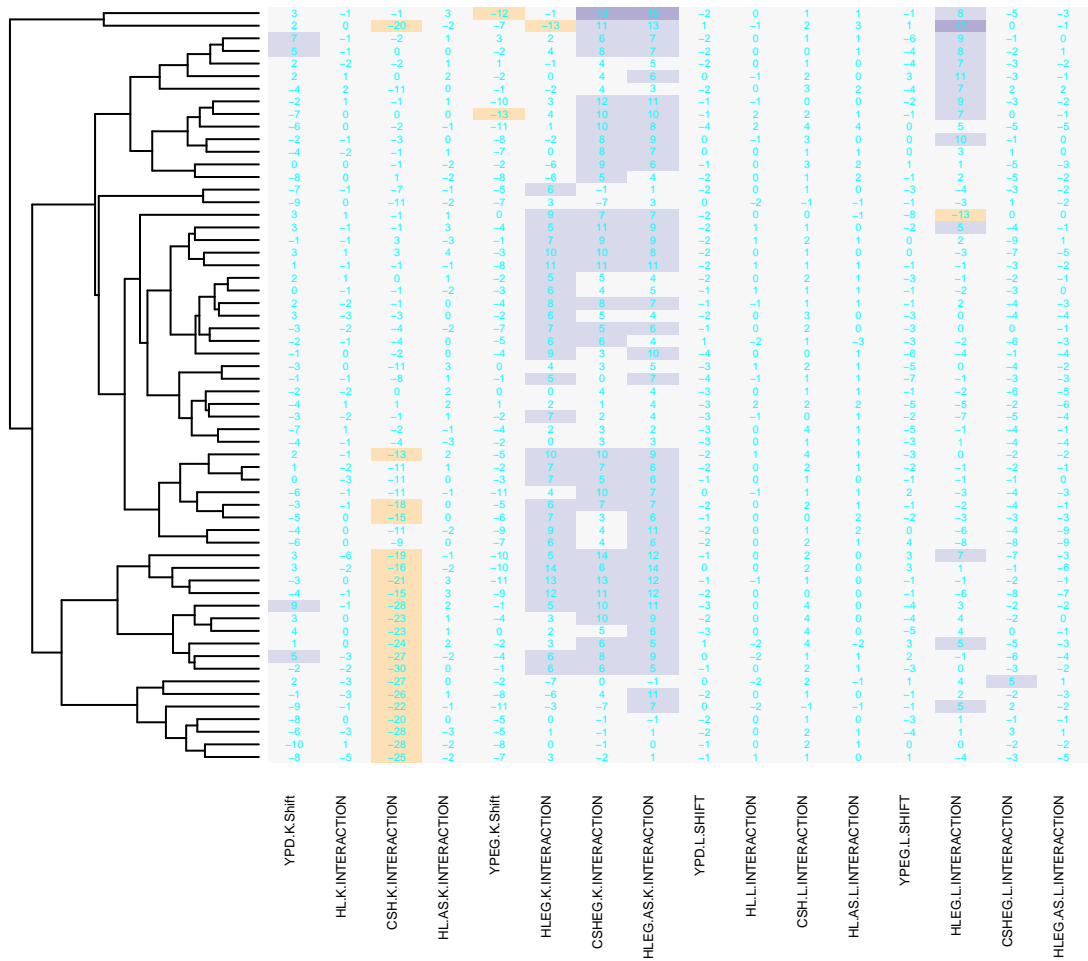

PDC6  
MCP1  
NCE102  
YNL217W  
YOR093C  
DYN1  
YOR175C  
HNM1  
SVL3  
YBL028C  
MEP3  
NUP188  
YPR027C  
YPT31  
YKL077W  
YKL076C  
TIF3  
NAS6  
IMP4  
PYC1  
CNN1  
YFR044C  
SCY1  
PDR16  
AST1  
SKS1  
YPL025C  
RNH203  
NUP100  
YKL066W  
NFIH  
ALD6  
ISN1  
SGE1  
DCS2  
YOR240W  
YKL123W  
HMX1  
YKL091C  
LAP4  
RPL26B  
PDR5  
HSL1  
YOR214C  
RUD3  
SUE1  
YGR031W  
YOR225W  
MAE1  
ABP140  
YKL131W  
YOR228C  
YGR071C  
YLR218C  
YKL107W  
VTA1  
BUD9  
MDL1  
YOR164C  
SEY1

Gene Name

Type of Media

0

**2-0.5-29**

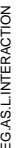

HLR1  
RUL2  
TQ94G1C  
CNR  
CQ34  
CQ34  
CQ34  
SM42  
AKC3  
RAC5  
XRE2  
YF81  
MSP1  
YBR1414  
YBR1415  
YU0090C  
MS42  
YBR1416  
YBR1417  
OP11  
GRK1  
PAB1  
DAB1  
SED4  
TGF1  
LSP1  
YU017C  
YU024W  
CNR  
YTP1  
SEI3  
SEI3  
PMA2  
DOT1  
BTH1  
XO939\_2  
CAF20  
XO939\_3  
ASM4  
ATP2  
ATP2  
TPS1  
TPR138C-A  
XO939\_4  
CMH11  
MSP1  
SSG2  
TOM8  
PMT5  
MSP1  
GRX4  
SSG2  
XO939\_5  
RNN10  
SGL1  
DUP1  
HUP2  
XO939\_6  
YU019W  
YU019W  
YU019W  
YU019W  
FLN1  
PHG5  
HUP2  
YBR15W  
HUL5  
RUC5  
RUC5  
YU020C  
SMF1  
TAL1  
YU023C-A  
MLO5  
YU026C  
VPS05

Gene Name

## Type of Media

Color Key

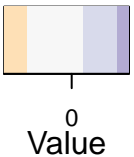

2-0.5-3

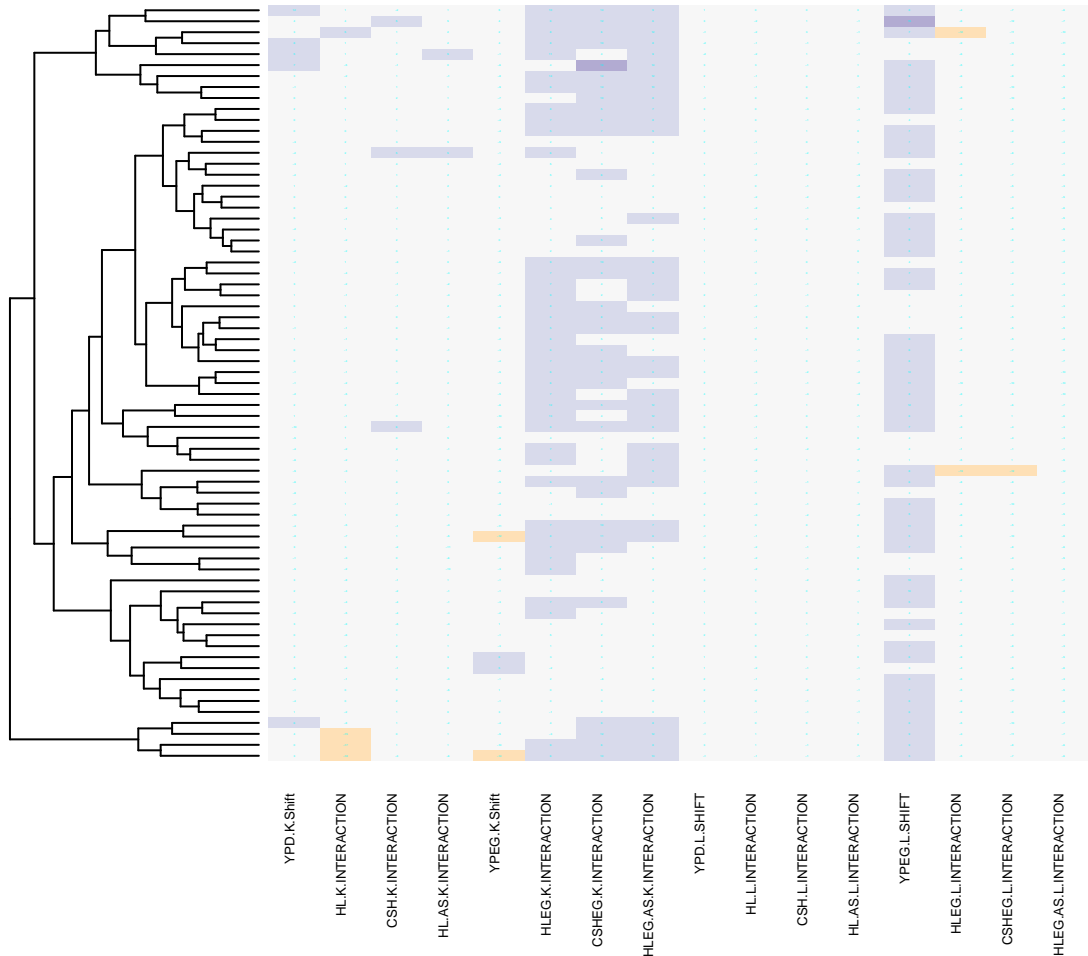

Gene Name

Type of Media

Color Key

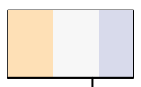

Value

2-0.5-30

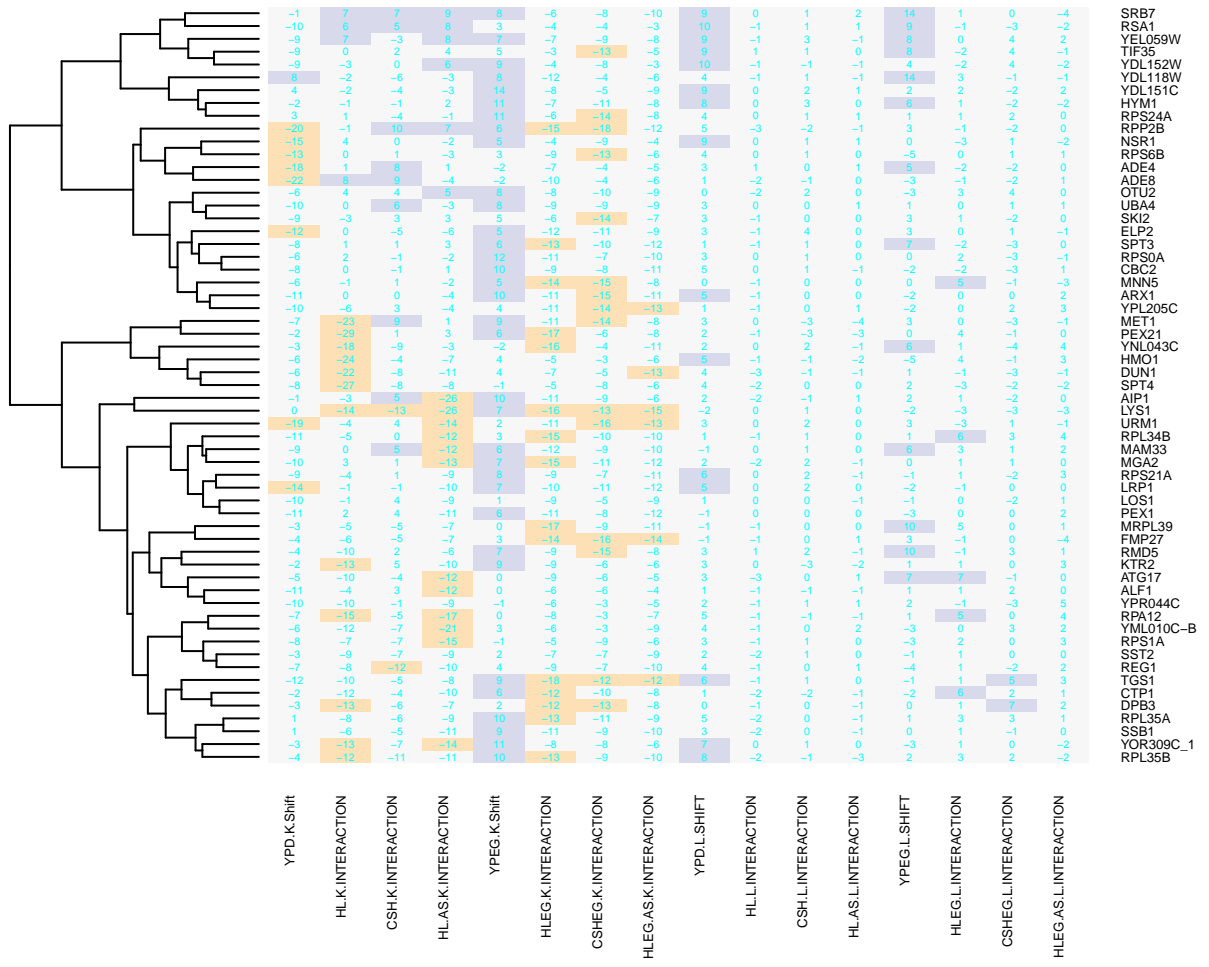

Gene Name

Type of Media

Color Key

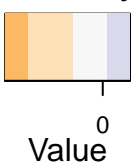

2-0.5-31

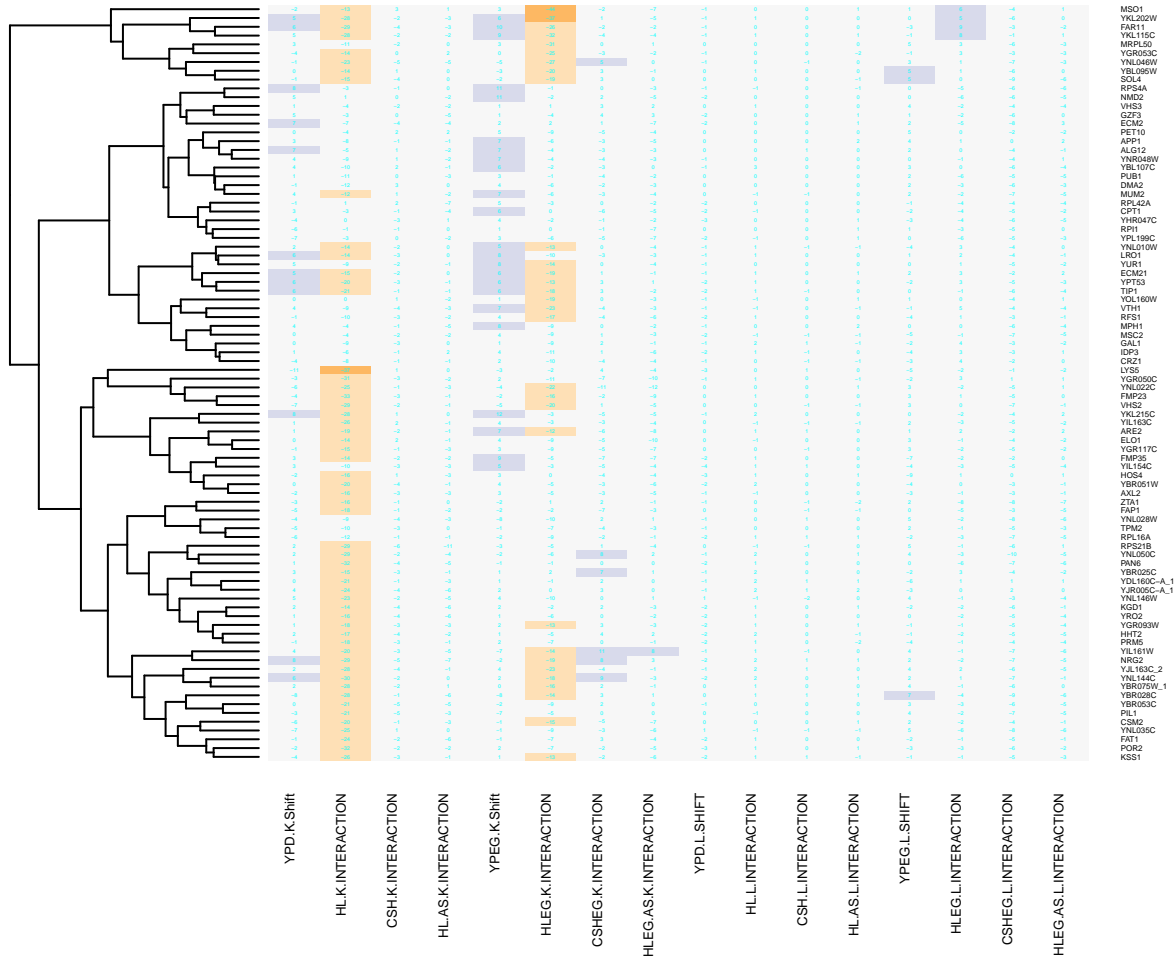

Gene Name

Type of Media

Color Key

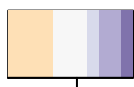

0  
Value

2-0.5-32

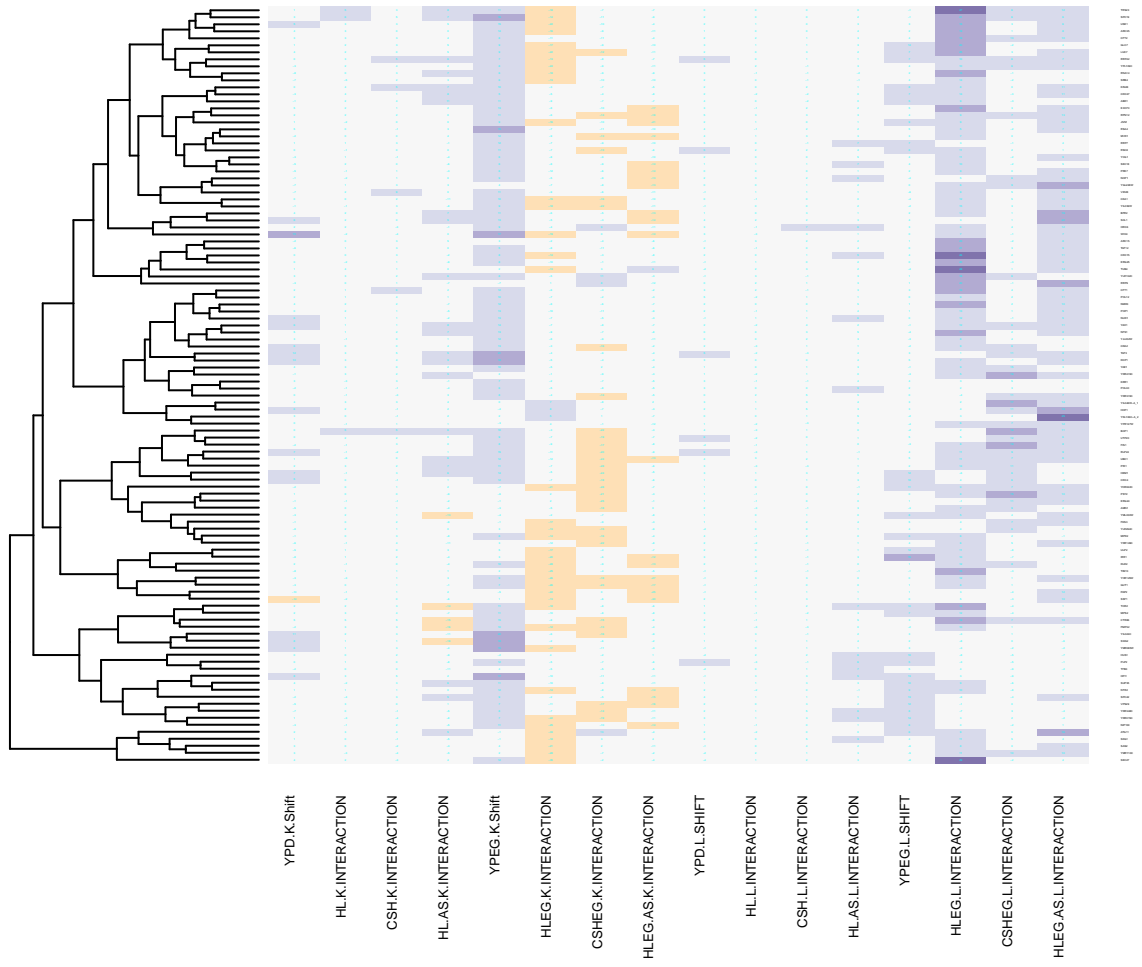

Gene Name

Type of Media

0

**2-0.5-4**

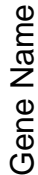

## Type of Media

Color Key

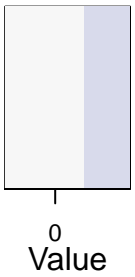

2-0.5-5

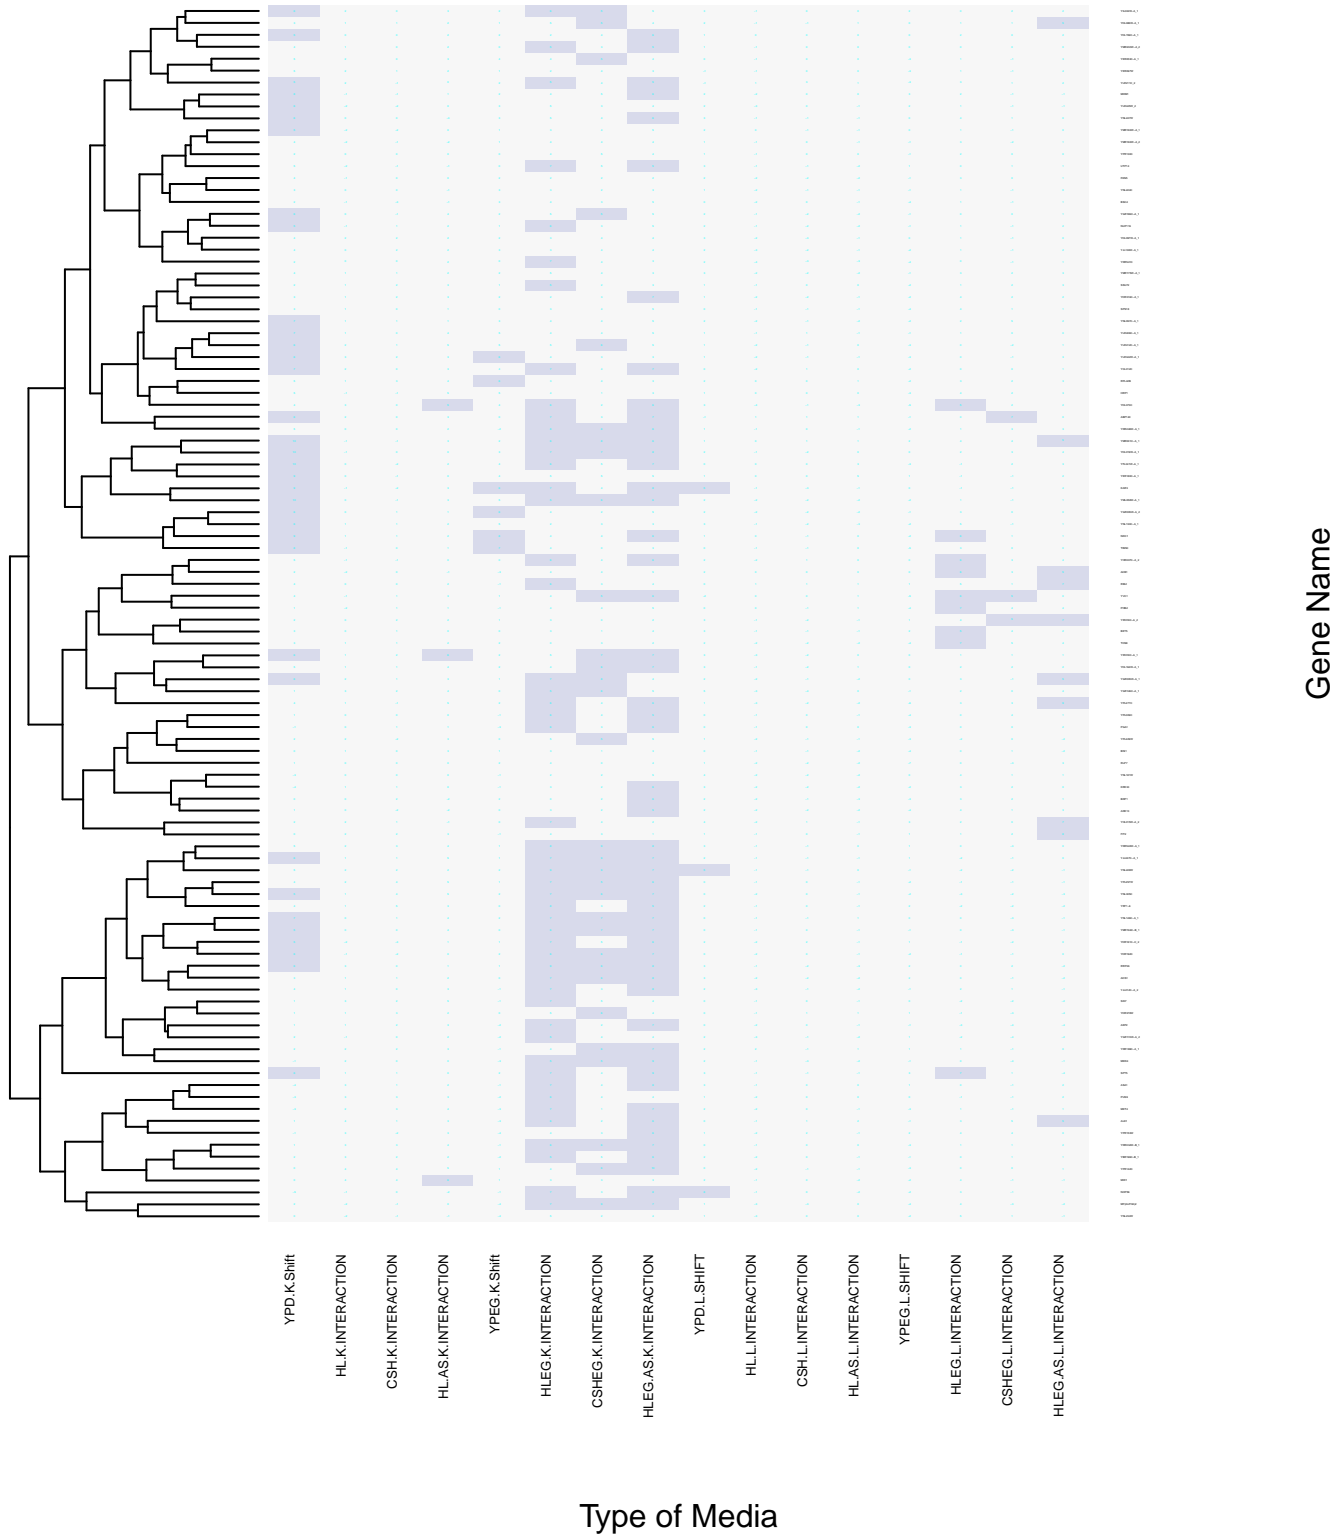

9

## 2-0.5-6

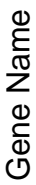

## Type of Media

Color Key

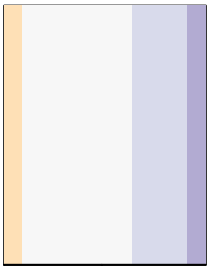

0  
Value

2-0.5-7

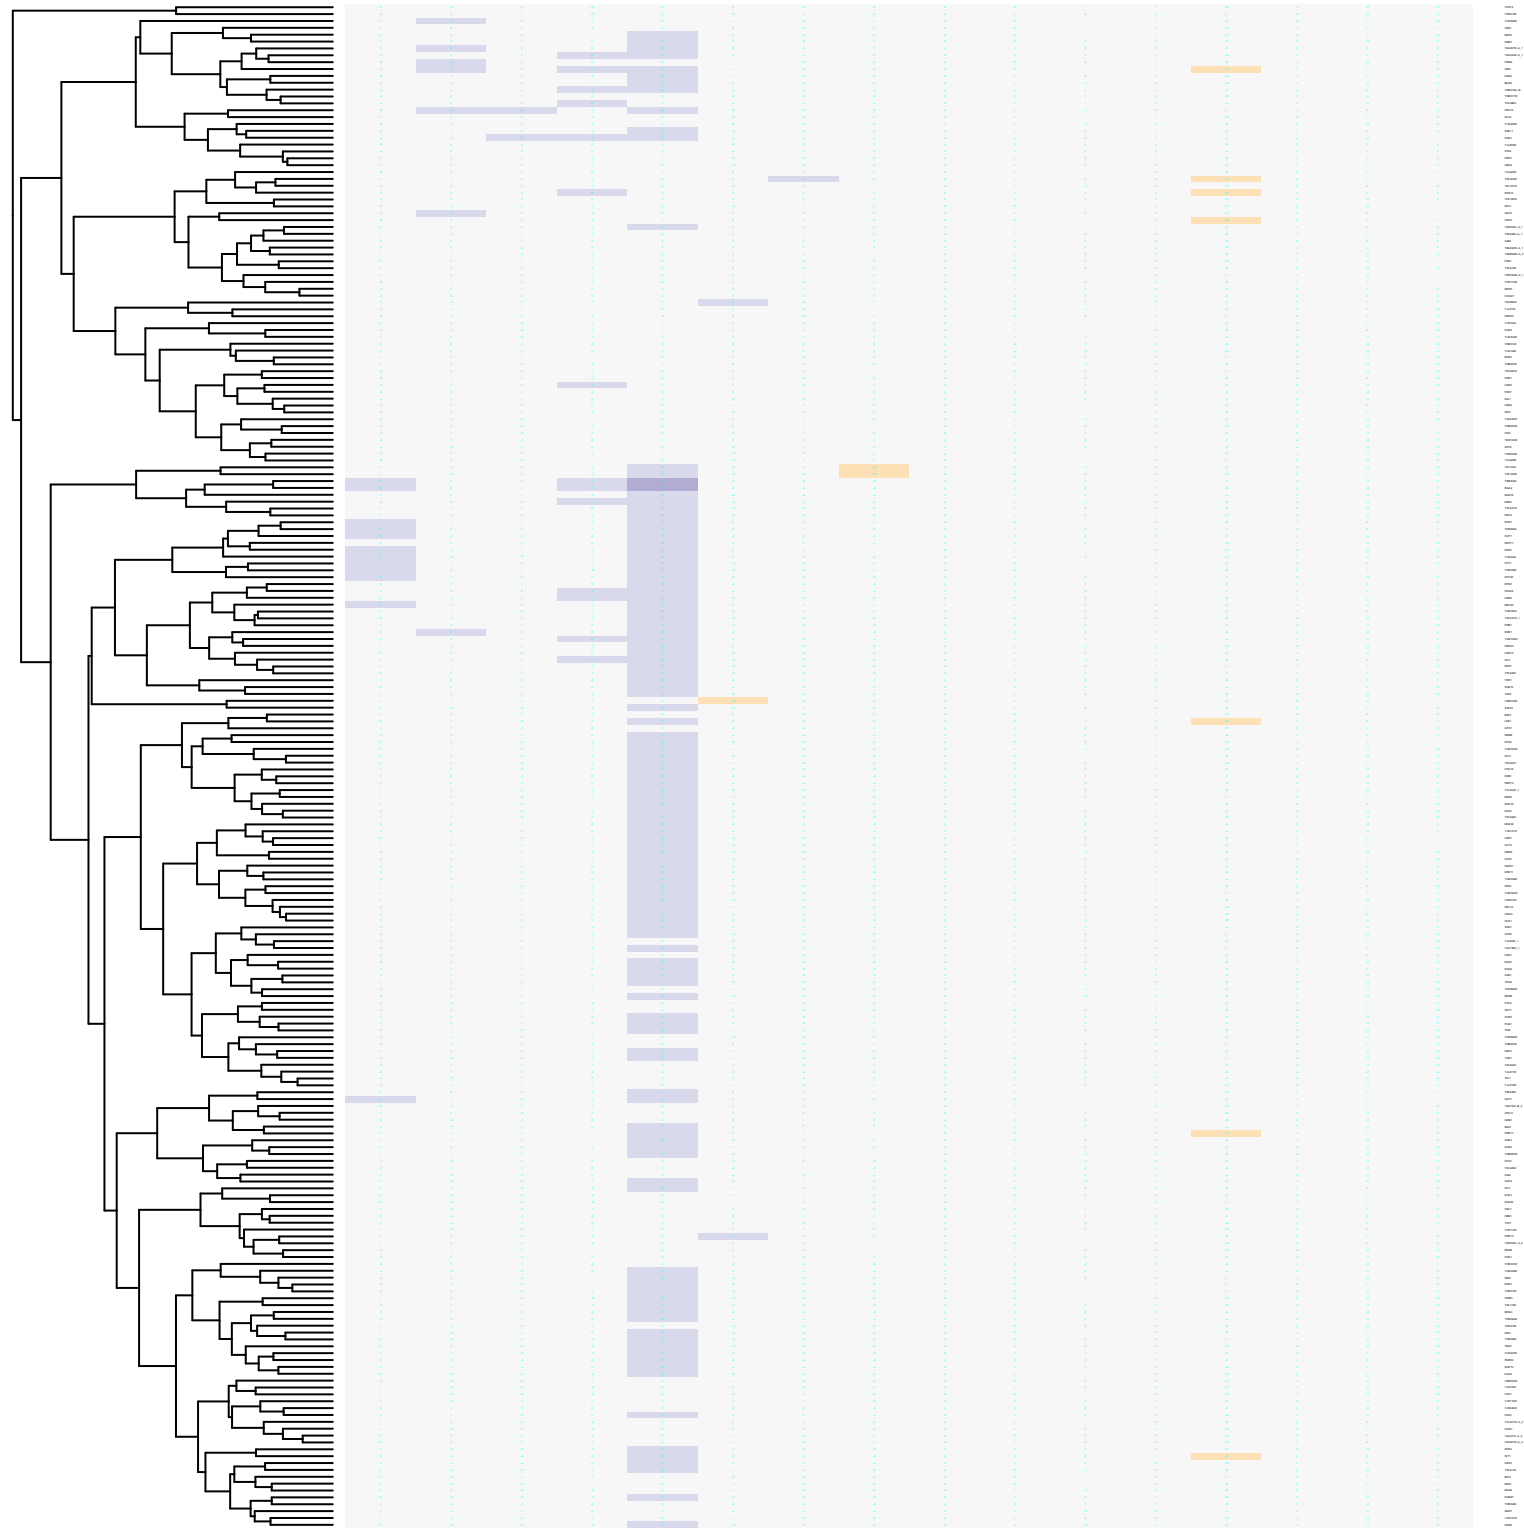

Gene Name

Type of Media

Color Key

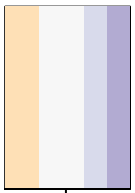

0

Value

2-0.5-8

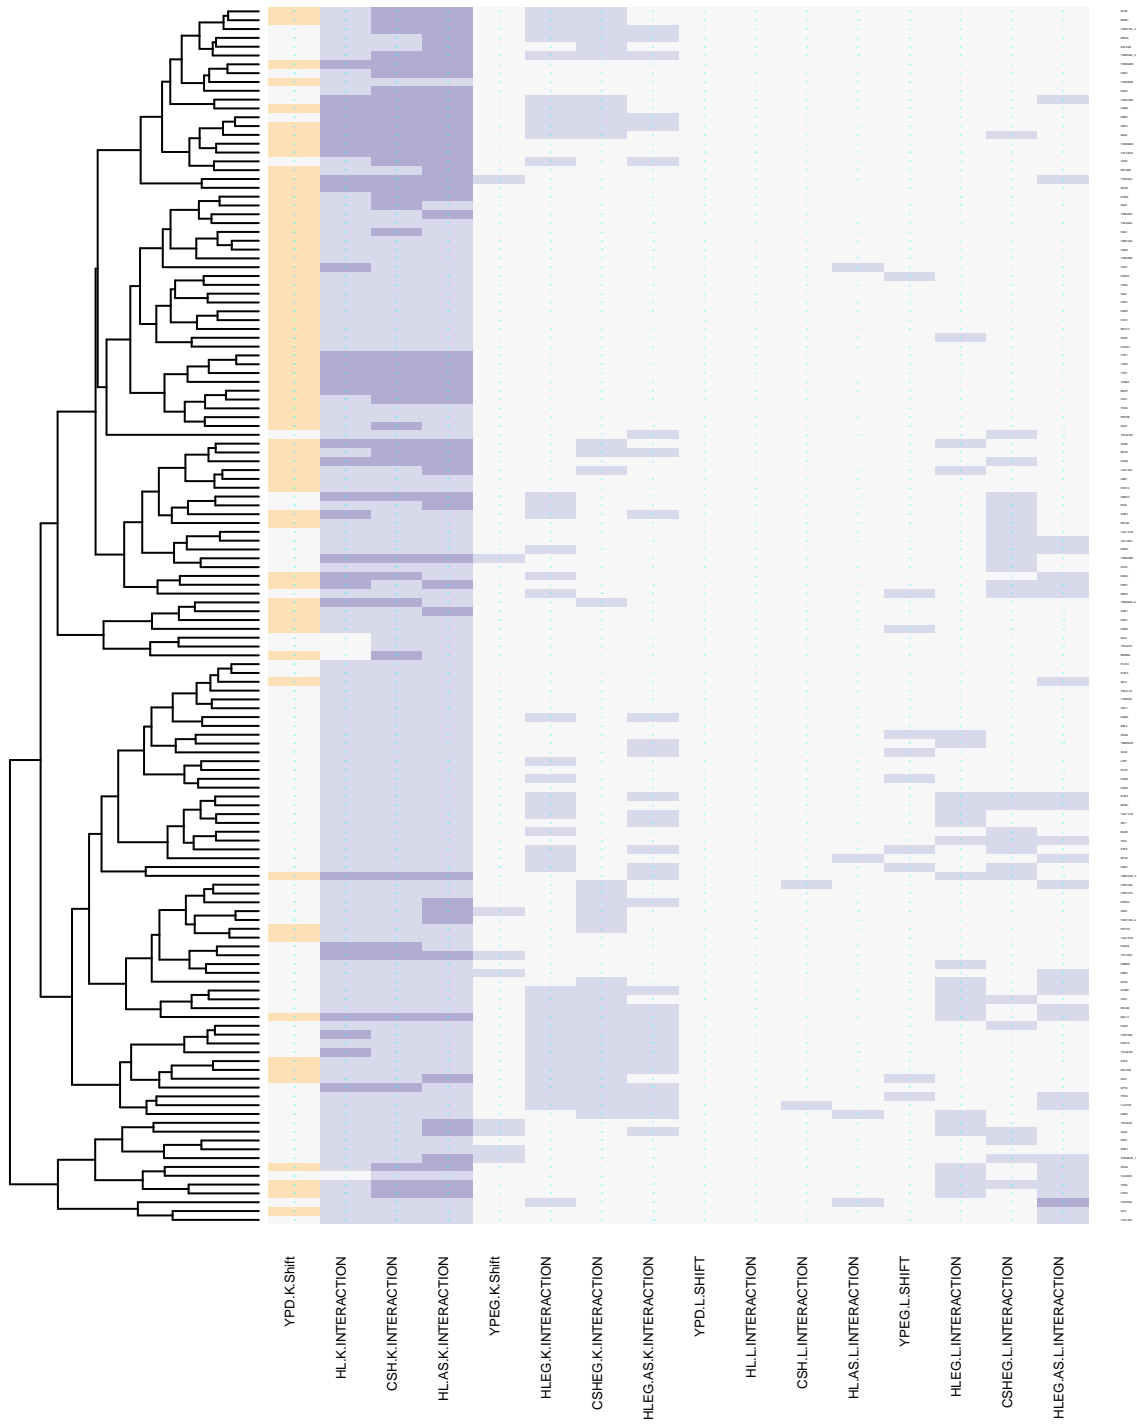

Gene Name

Type of Media

Color Key

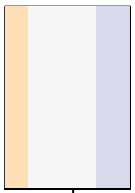

0  
Value

2-0.5-9

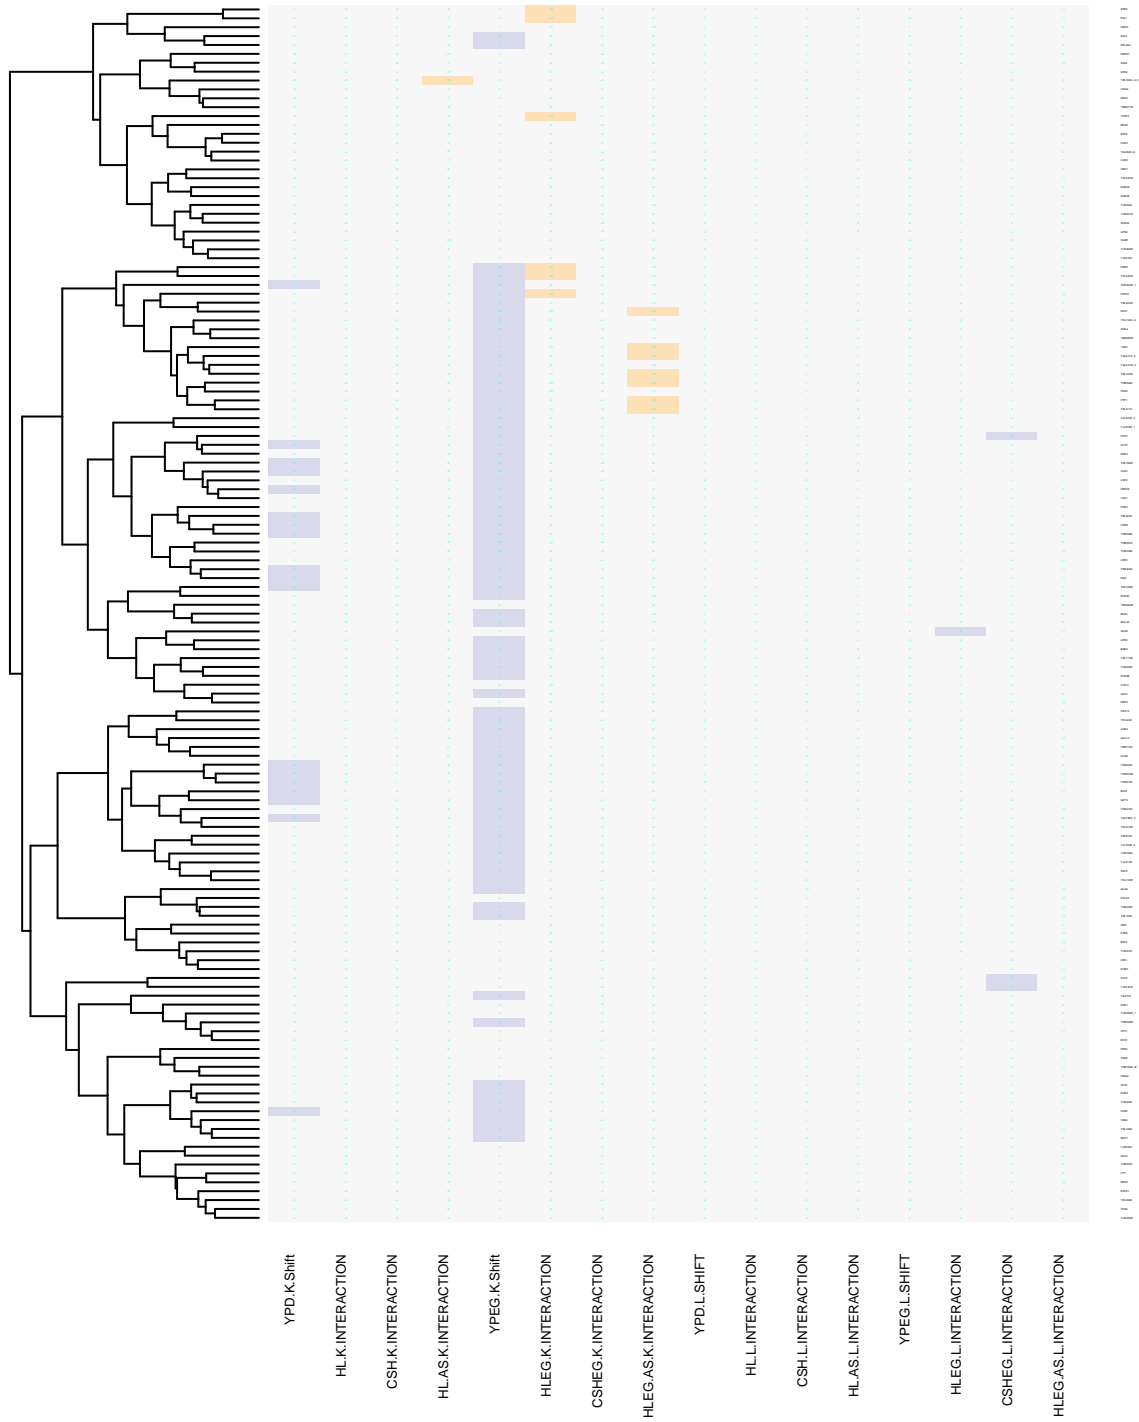

Type of Media

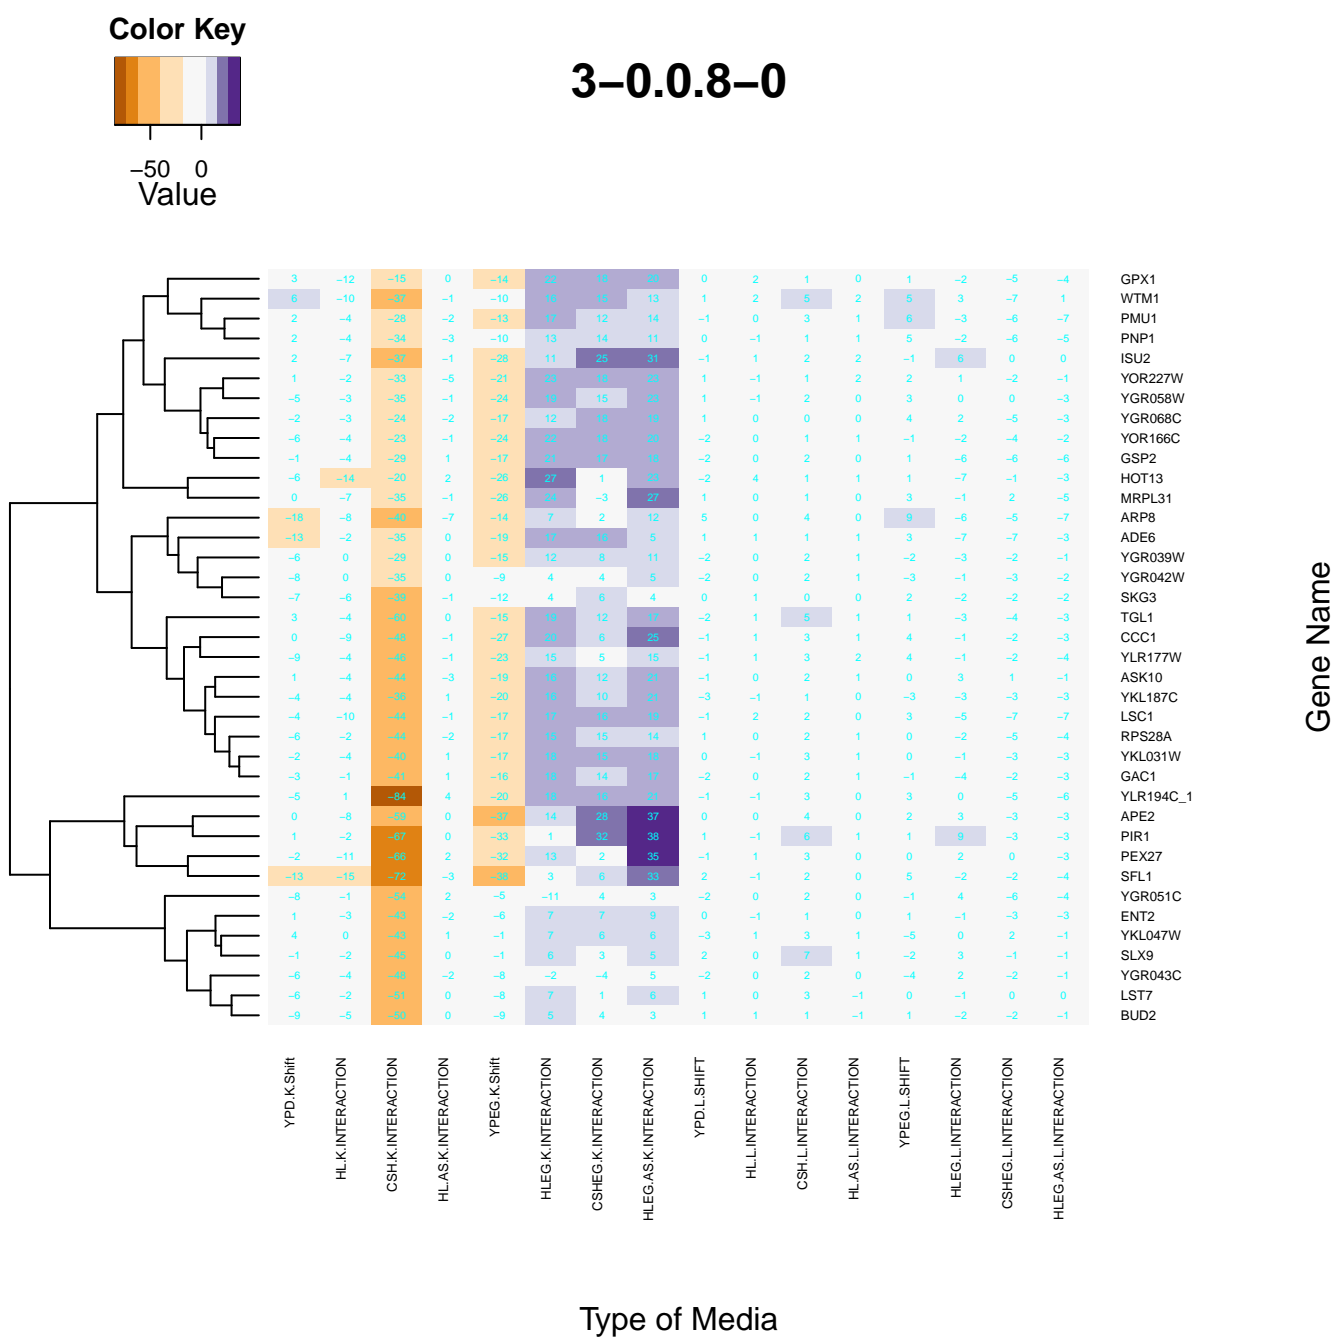

Color Key

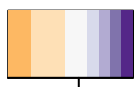

0  
Value

3-0.0.8-1

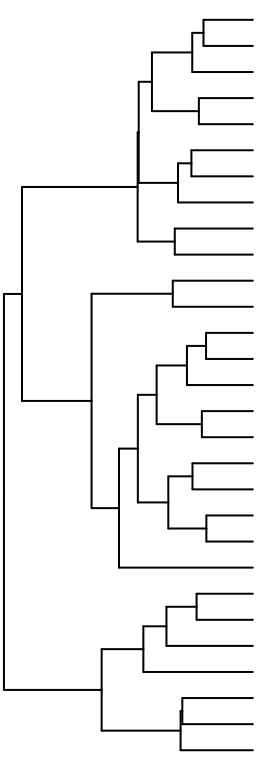

|     |    |     |    |     |    |    |    |    |    |    |    |    |    |     |    |
|-----|----|-----|----|-----|----|----|----|----|----|----|----|----|----|-----|----|
| 1   | 0  | -21 | 2  | -22 | 28 | 27 | 28 | 5  | -1 | 0  | -1 | 7  | 0  | -6  | -2 |
| -1  | -1 | -26 | 2  | -21 | 28 | 27 | 26 | 3  | -1 | 2  | -1 | 6  | 4  | -6  | -2 |
| -2  | -2 | -20 | 0  | -23 | 26 | 28 | 29 | 1  | 1  | 5  | 2  | 4  | 3  | -2  | -2 |
| -3  | 3  | -22 | 2  | -27 | 30 | 29 | 28 | -4 | 0  | 3  | 1  | -2 | -5 | -11 | -7 |
| -7  | 2  | -27 | 0  | -28 | 27 | 26 | 27 | -2 | 0  | 2  | 1  | -1 | -2 | -6  | -5 |
| 1   | -5 | -21 | 1  | -24 | 27 | 26 | 28 | 1  | -1 | 0  | -2 | 7  | -4 | -7  | -8 |
| -2  | -1 | -22 | 3  | -22 | 25 | 22 | 25 | -2 | 0  | 3  | 1  | 3  | -7 | -4  | -7 |
| 2   | -2 | -11 | 0  | -23 | 28 | 25 | 25 | -2 | 0  | 2  | 1  | 4  | -6 | -8  | -7 |
| 3   | 0  | -17 | 3  | -30 | 27 | 30 | 36 | -2 | 0  | 2  | 0  | 3  | 3  | -6  | -5 |
| 1   | 0  | -22 | 2  | -31 | 35 | 27 | 36 | 0  | -1 | 4  | -1 | 0  | -4 | -2  | -2 |
| 7   | -2 | -28 | 4  | -12 | 24 | 21 | 22 | -3 | 0  | 3  | 0  | 0  | -3 | -6  | -6 |
| 0   | 0  | -23 | 2  | -16 | 21 | 14 | 22 | -4 | 1  | 6  | 1  | 2  | -8 | -6  | -9 |
| 2   | -2 | -31 | 0  | -23 | 27 | 26 | 27 | 1  | 0  | 3  | 1  | 8  | -1 | -5  | -5 |
| 3   | -1 | -34 | 3  | -21 | 28 | 27 | 29 | -1 | -1 | 1  | 0  | 3  | -5 | -6  | -6 |
| 1   | -3 | -39 | -1 | -22 | 26 | 25 | 23 | -1 | 0  | 3  | 0  | 1  | -5 | -5  | -5 |
| -4  | -1 | -28 | 0  | -21 | 24 | 20 | 22 | -2 | 0  | 1  | 1  | 3  | -8 | -8  | -6 |
| -5  | 0  | -35 | 2  | -22 | 23 | 20 | 19 | -2 | 0  | 2  | 0  | 2  | -8 | -8  | -8 |
| -4  | 0  | -38 | 1  | -29 | 29 | 19 | 27 | -2 | 0  | 4  | 1  | 1  | -4 | -2  | -6 |
| -4  | -1 | -39 | 3  | -25 | 26 | 14 | 25 | 2  | -3 | -1 | -2 | 5  | -6 | -2  | -5 |
| -5  | -3 | -46 | 3  | -25 | 24 | 23 | 23 | 2  | -1 | 2  | 0  | 5  | -1 | -5  | -3 |
| 1   | -2 | -45 | -1 | -25 | 25 | 23 | 24 | 1  | -1 | 2  | 0  | 6  | -2 | -8  | -6 |
| 4   | -1 | -49 | 2  | -14 | 22 | 20 | 19 | 0  | -1 | 4  | -2 | 3  | -5 | -7  | -5 |
| -1  | 2  | -46 | 3  | -29 | 29 | 29 | 31 | 3  | -3 | 6  | -1 | 5  | 3  | -3  | -2 |
| -6  | -1 | -43 | 3  | -30 | 29 | 29 | 33 | 7  | -1 | 2  | 0  | 2  | 2  | -1  | 0  |
| 2   | -4 | -27 | 0  | -29 | 24 | 32 | 34 | 4  | -1 | 0  | 0  | 4  | 8  | 0   | -1 |
| 2   | 0  | -50 | 1  | -29 | 14 | 30 | 33 | 4  | -3 | 4  | -1 | 8  | 6  | -5  | -4 |
| -1  | -1 | -49 | 2  | -36 | 28 | 25 | 38 | 1  | -1 | 2  | 0  | 3  | 2  | -1  | -4 |
| -1  | -2 | -43 | -1 | -36 | 34 | 31 | 32 | 0  | -1 | 2  | 0  | 6  | -3 | -4  | -3 |
| -10 | 2  | -50 | 0  | -40 | 33 | 24 | 33 | -1 | -1 | 1  | 0  | 2  | -2 | -3  | -5 |

RPL33B  
HES1  
UBP2  
YKL070W  
TIM21  
YGR122W  
INP53  
RCN1  
PAN3  
PNS1  
RGS2  
YKL071W  
YKL133C  
OAC1  
RSA3  
YKL102C  
YGR045C  
YOR170W  
STE4  
IXR1  
SAS5  
YOR097C  
YOR215C  
RPS23A  
PIN2  
CRC1  
YKL158W  
SSH4  
RFX1

Gene Name

YPD.K.Shift  
HLK.INTERACTION  
CSH.K.INTERACTION  
HLAS.K.INTERACTION  
YPEG.K.Shift  
HLEG.K.INTERACTION  
CSHEG.K.INTERACTION  
HLEG.AS.K.INTERACTION  
YPD.L.Shift  
HLL.INTERACTION  
CSH.L.INTERACTION  
HLAS.L.INTERACTION  
YPEG.L.Shift  
HLEG.L.INTERACTION  
CSHEG.L.INTERACTION  
HLEG.AS.L.INTERACTION

Type of Media

Color Key



3-0.1.0-0

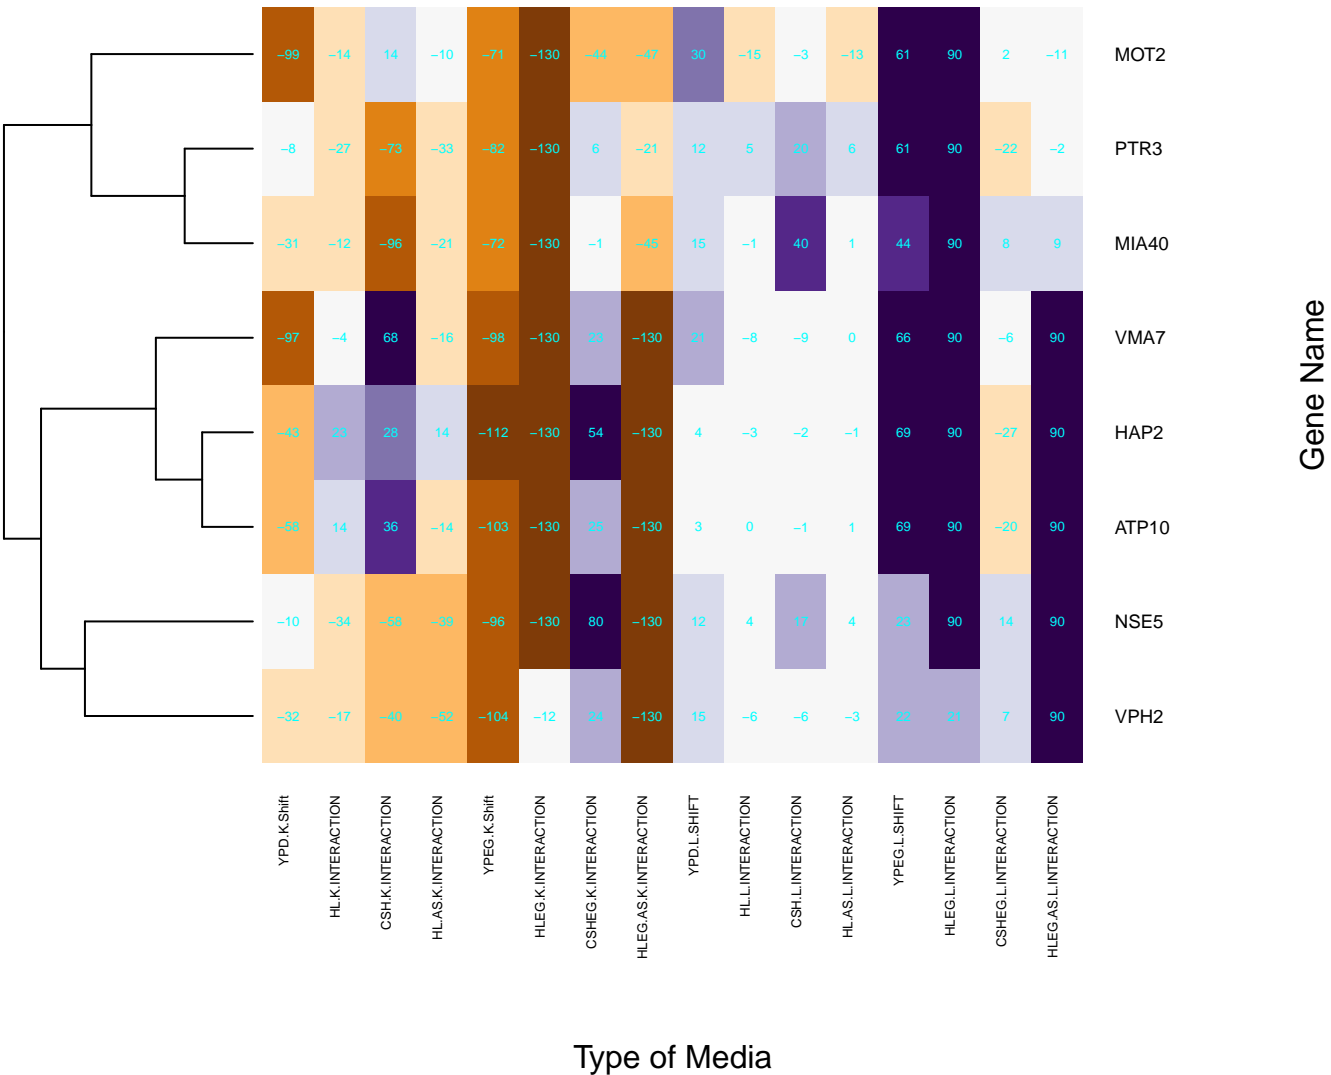

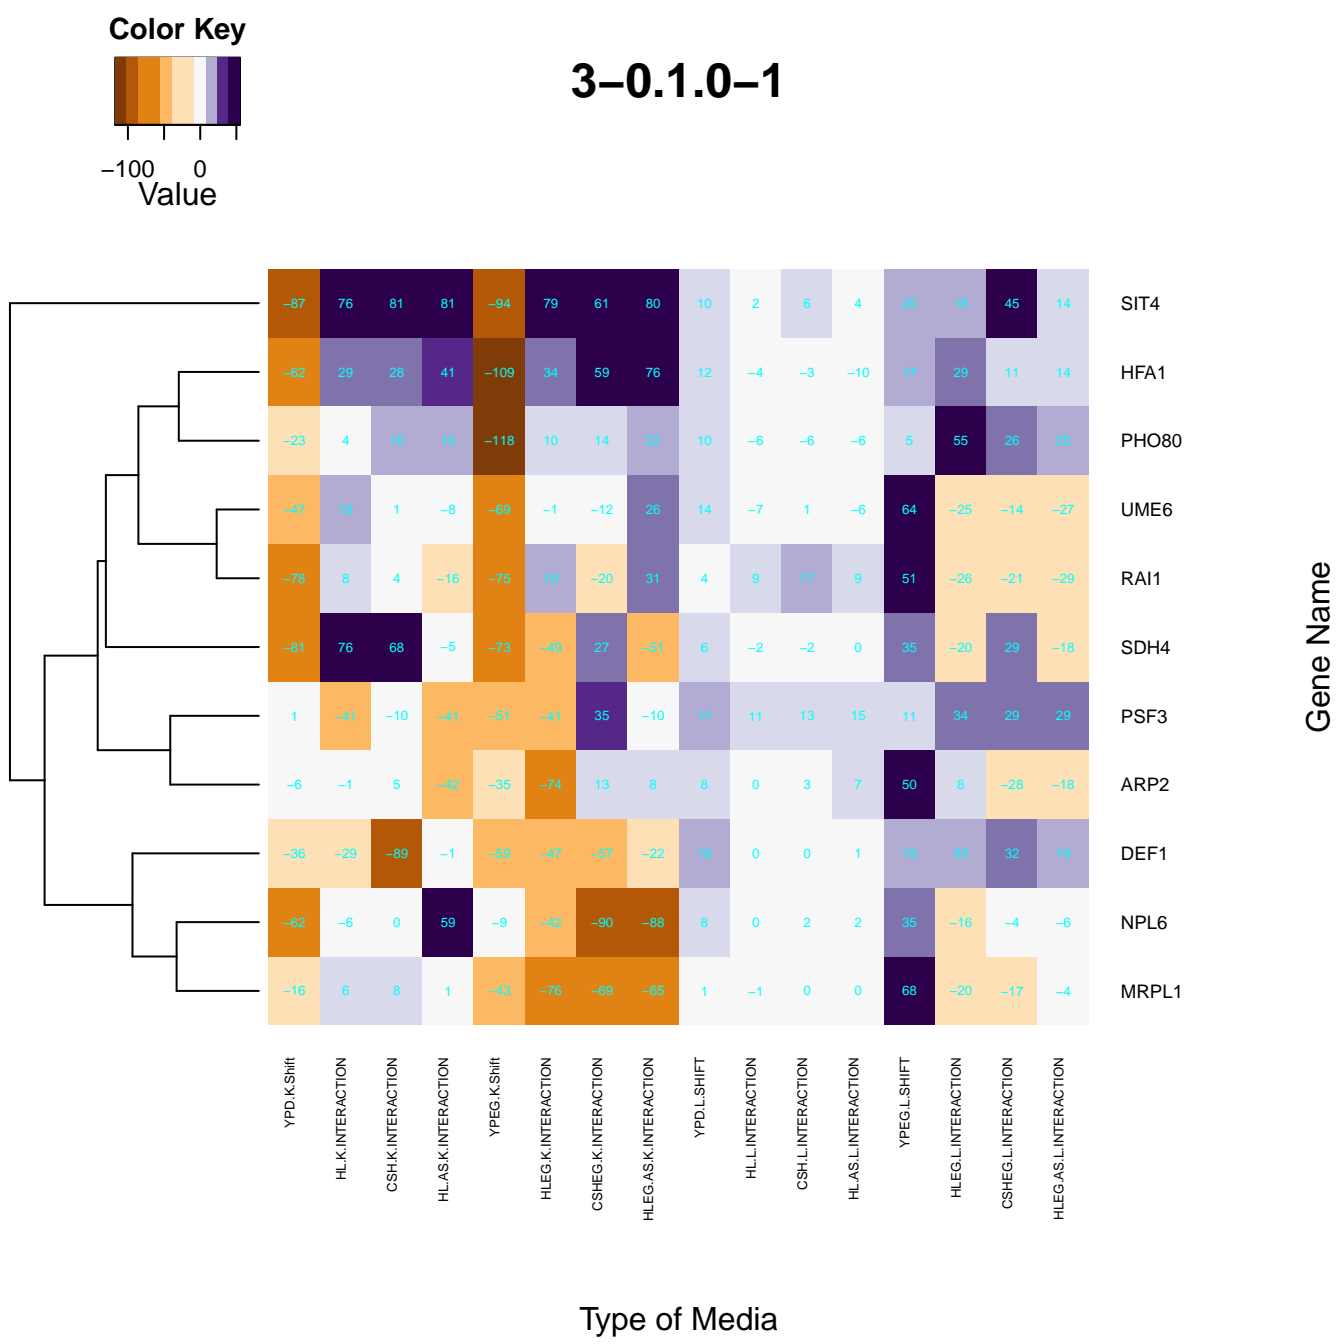

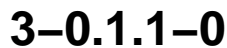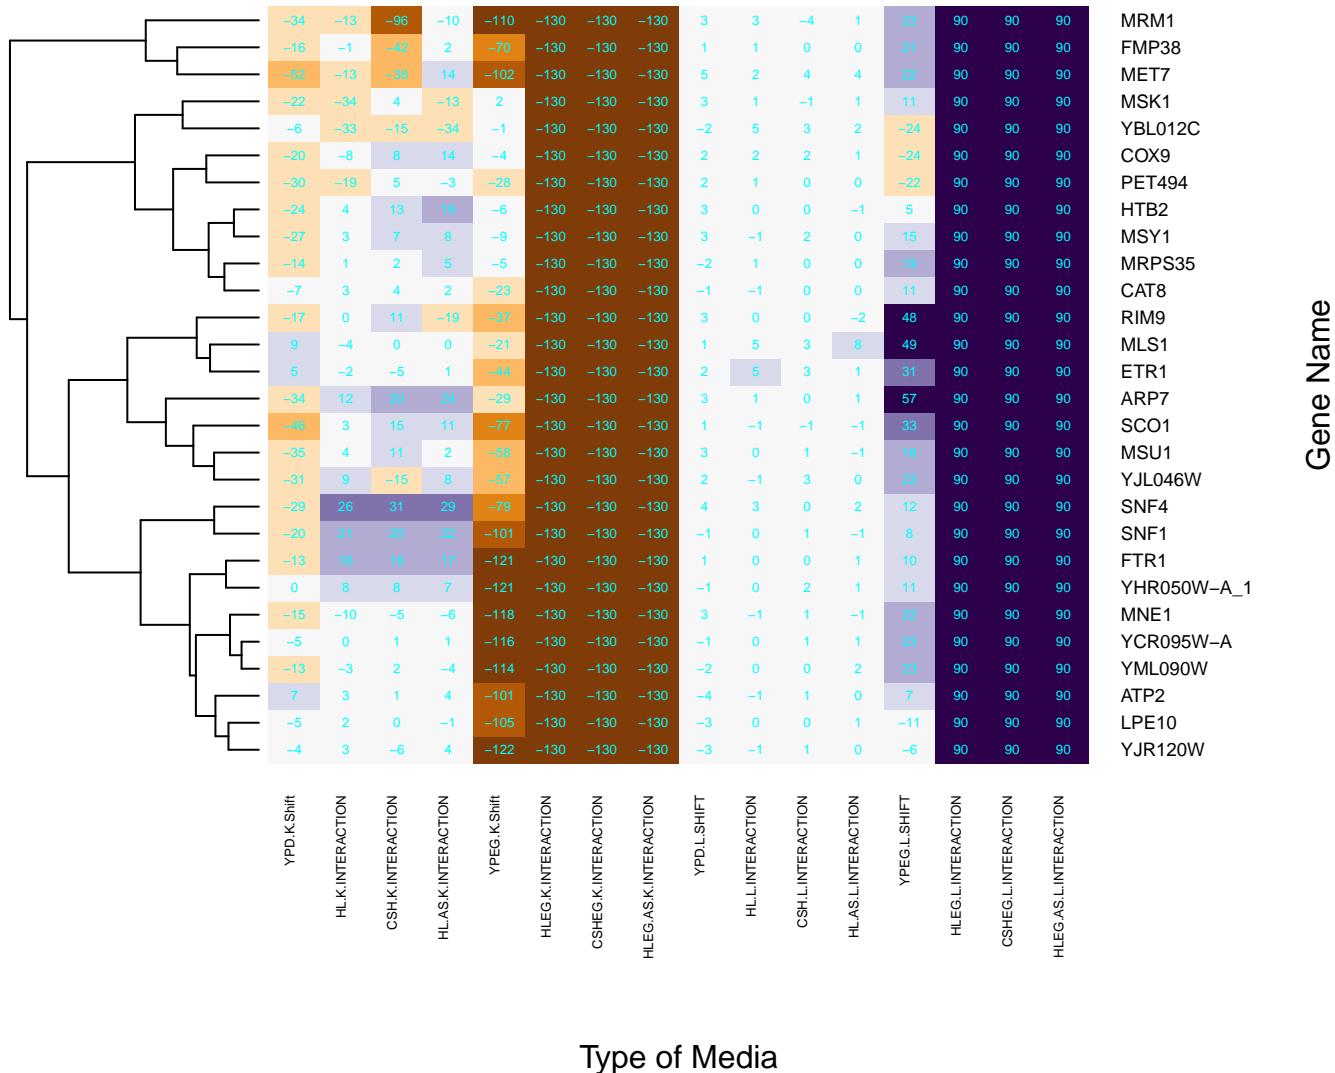

Color Key



3-0.1.1-1

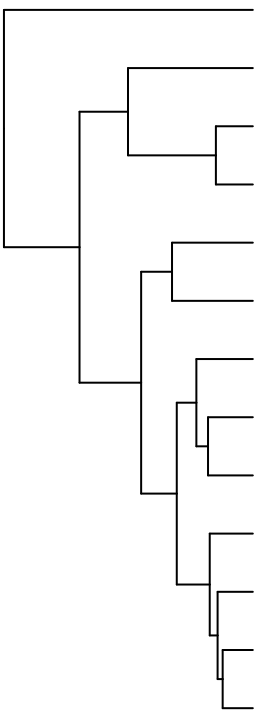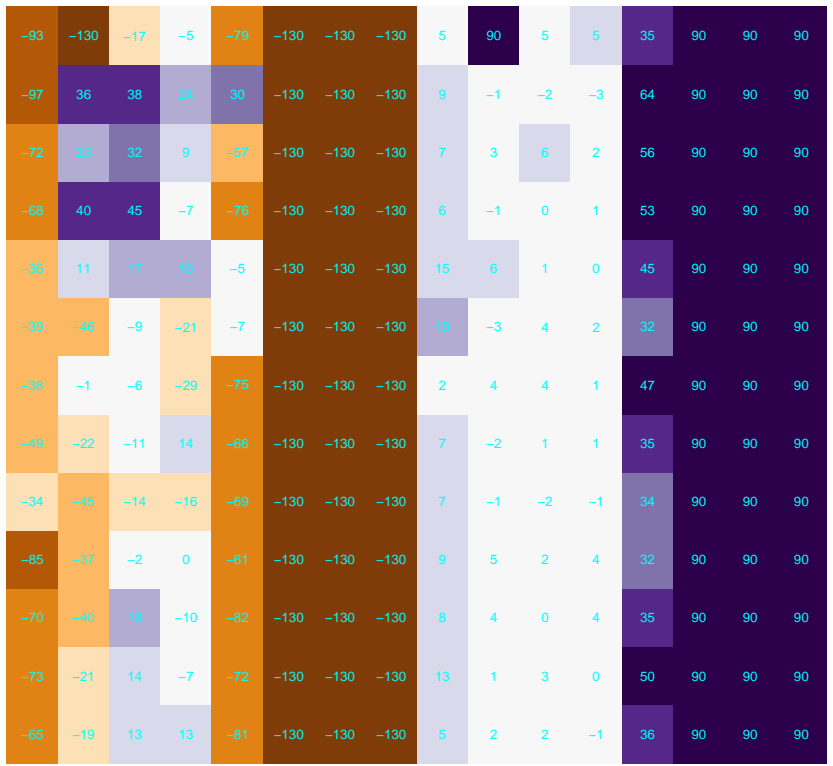

FLX1  
MRPL37  
MEC3  
DCS1  
MRPS5  
CKS1  
LCB5  
YBL100C  
YNR020C  
ATP1  
RSM19  
SWI3  
MST1

Gene Name

YPD.K.Shift  
HLK.INTERACTION  
CSH.K.INTERACTION  
HLAS.K.INTERACTION  
YPEG.K.Shift  
HLEG.K.INTERACTION  
CSHEG.K.INTERACTION  
HLEG.AS.K.INTERACTION  
YPD.L.Shift  
HLL.INTERACTION  
CSH.L.INTERACTION  
HLAS.L.INTERACTION  
YPEG.L.Shift  
HLEG.L.INTERACTION  
CSHEG.L.INTERACTION  
HLEG.AS.L.INTERACTION

Type of Media

Color Key



3-0.1.2-0

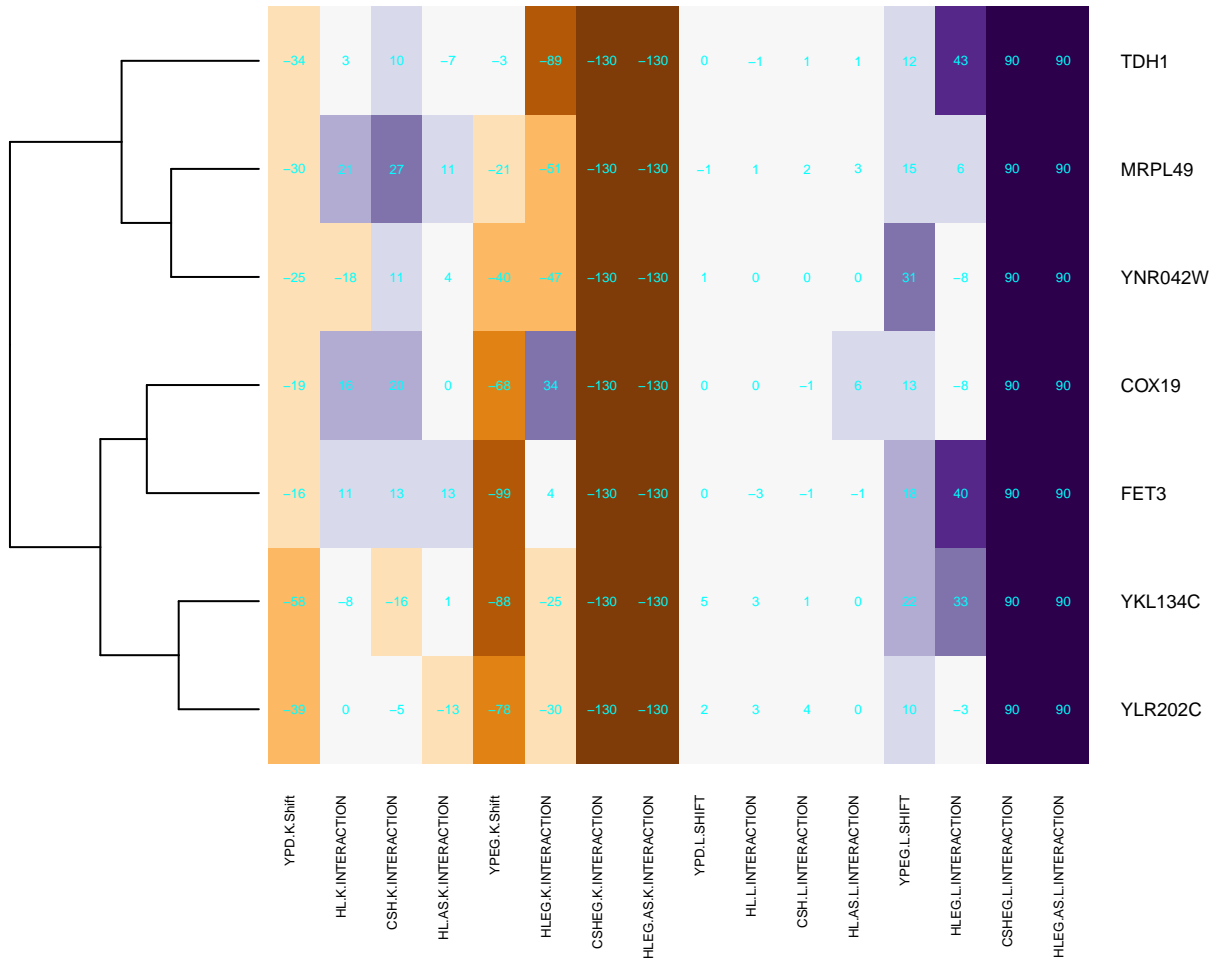

Gene Name

Type of Media

Color Key



3-0.1.2-2

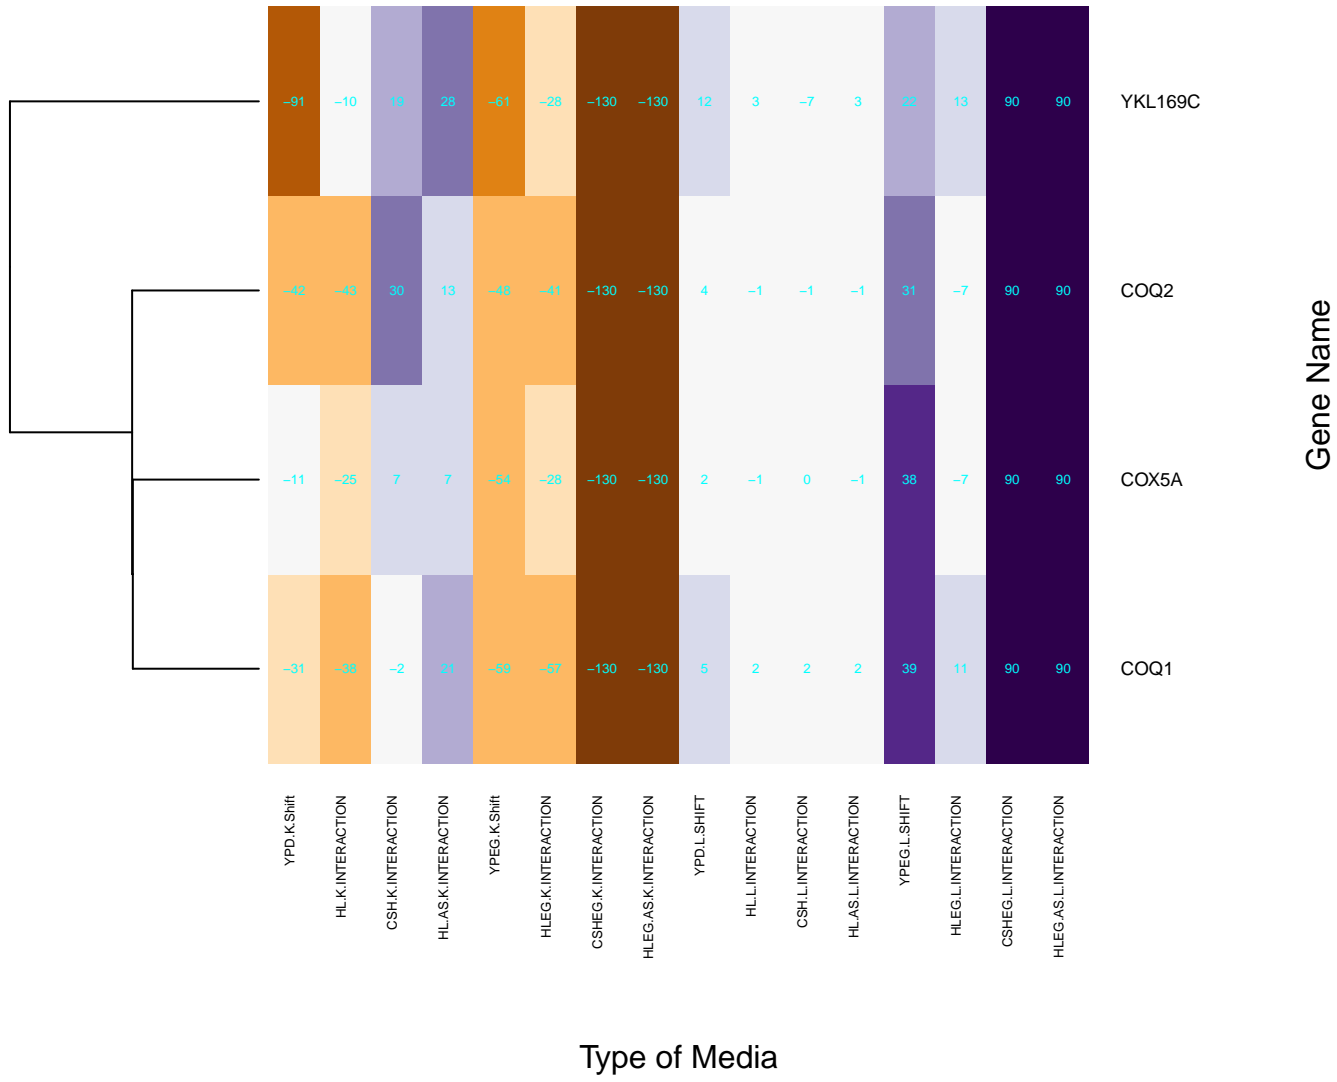

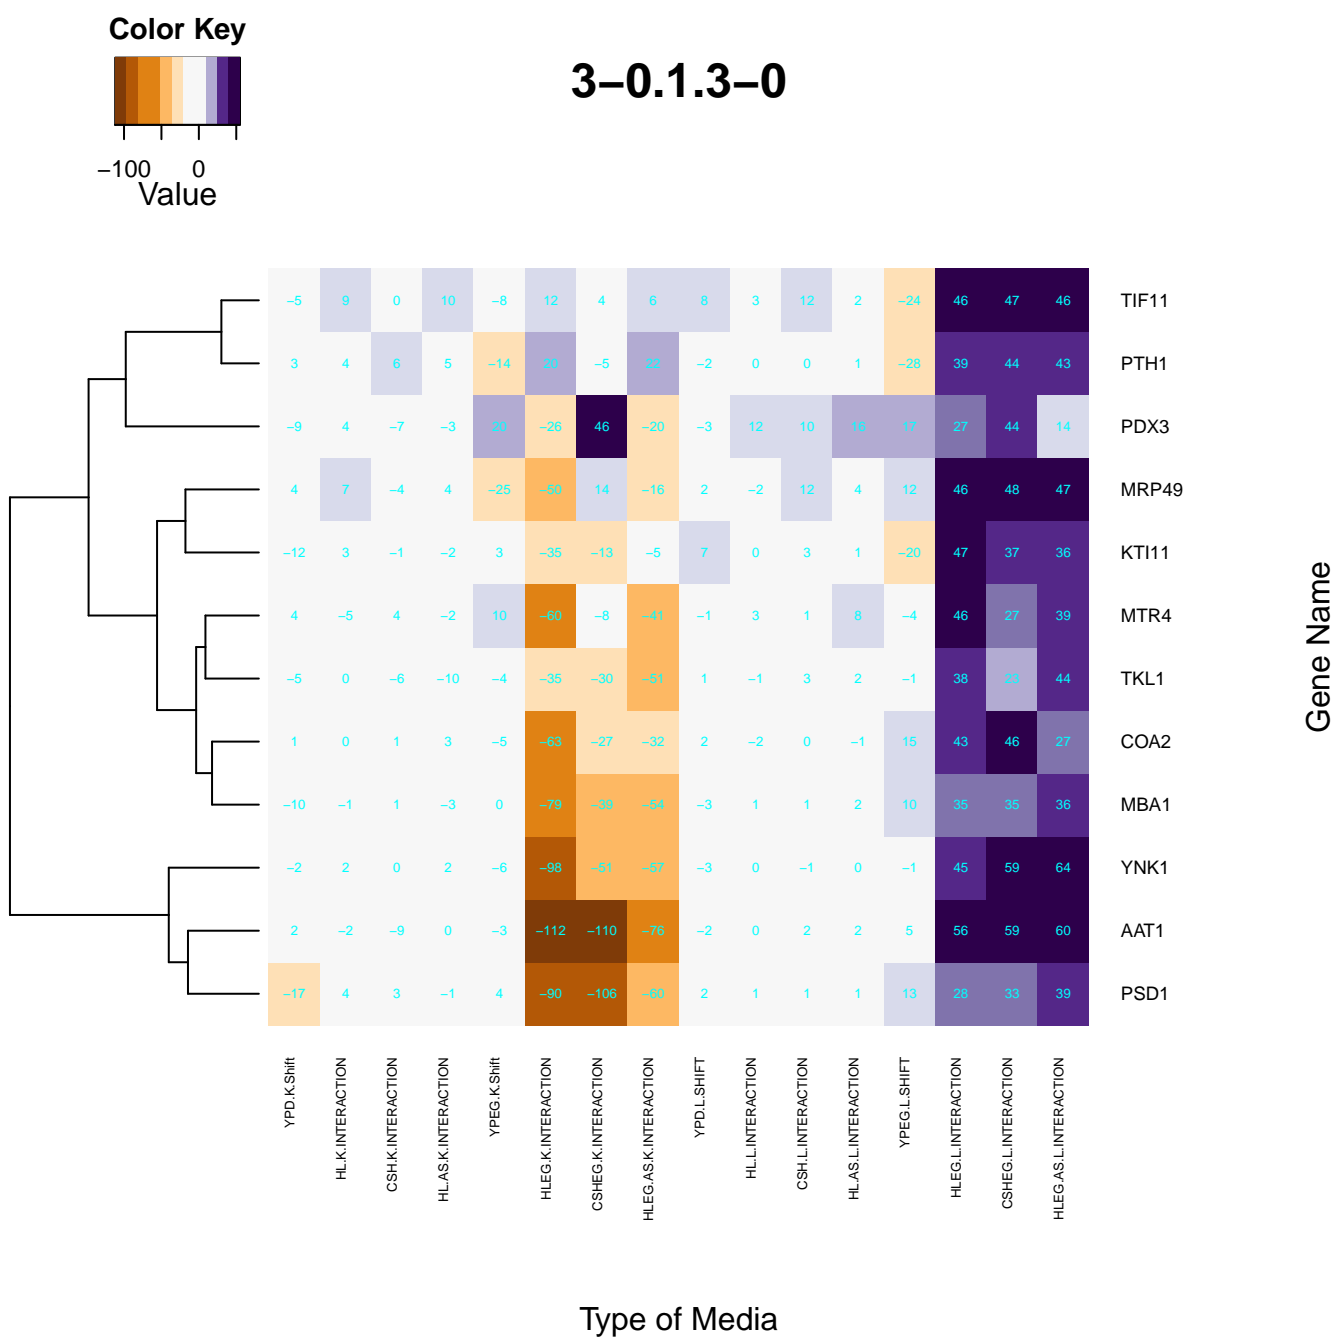

Color Key



3-0.1.3-1

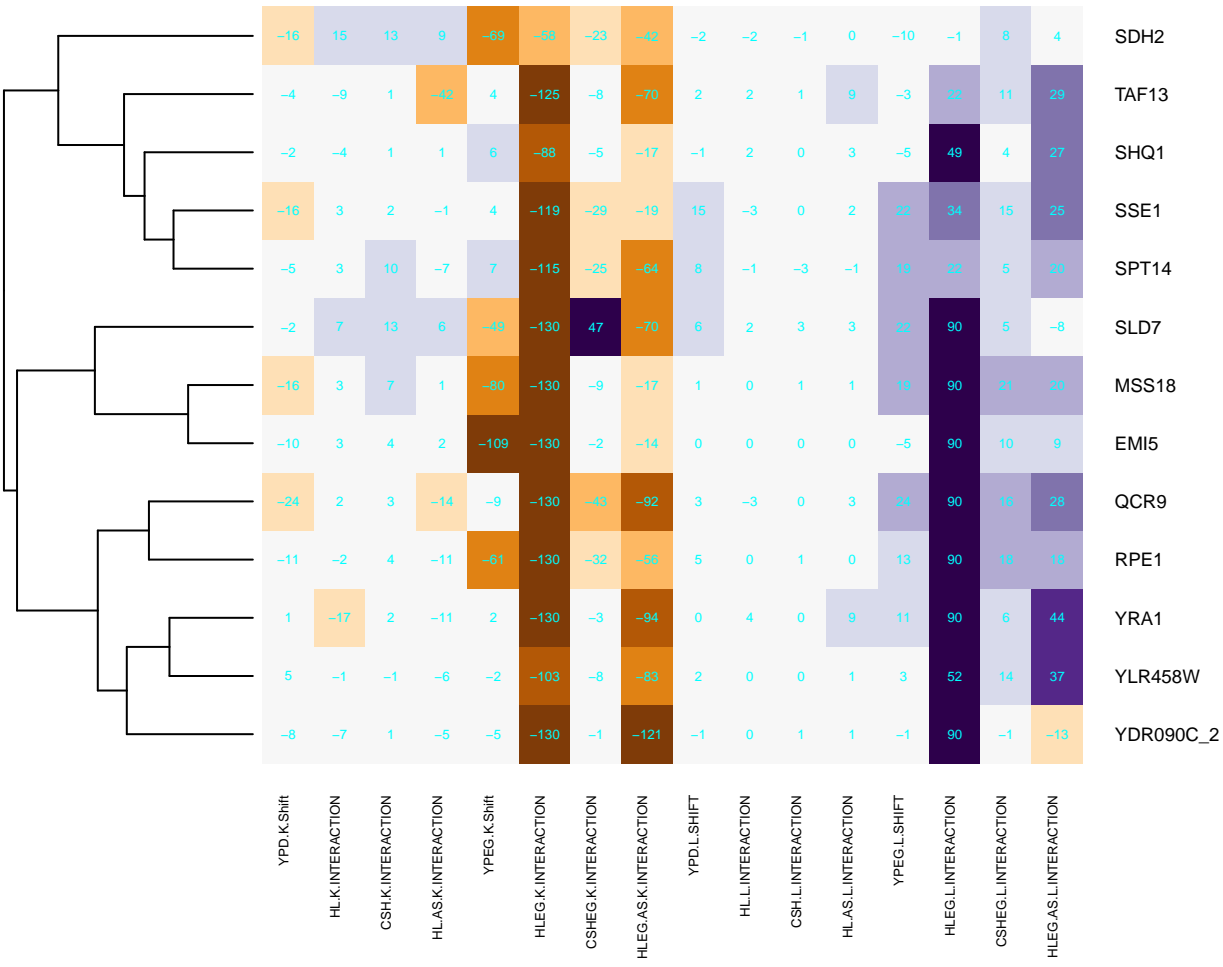

Gene Name

Type of Media

Color Key

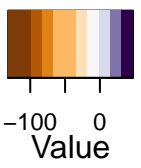

3-0.1.3-2

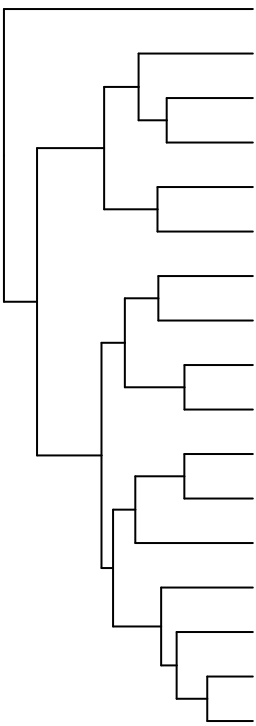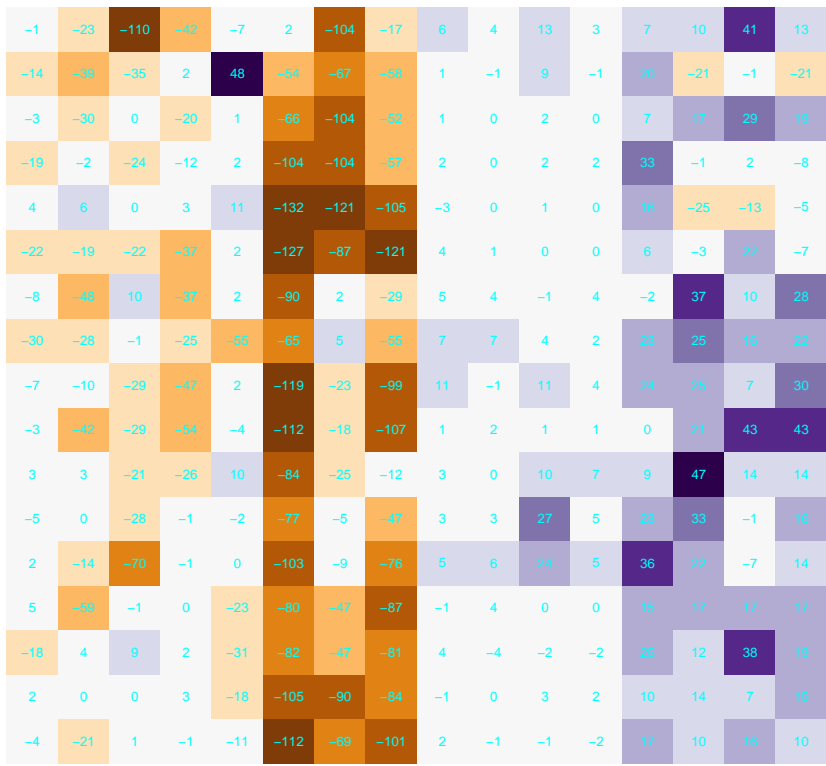

YGL007C-A\_2  
BUD16  
FMP13  
HIS7  
FSH1  
POS5  
YLR379W  
TOM22  
SPC29  
GSH2  
BCD1  
CSE4  
PRP22  
YNR025C  
NGL2  
CMC1  
EAF7

Gene Name

YPD.K.Shift  
HLK.INTERACTION  
CSH.K.INTERACTION  
HLAS.K.INTERACTION  
YPEG.K.Shift  
HLEG.K.INTERACTION  
CSHEG.K.INTERACTION  
HLEGAS.K.INTERACTION  
YPD.L.Shift  
HLL.INTERACTION  
CSH.L.INTERACTION  
HLAS.L.INTERACTION  
YPEG.L.Shift  
HLEG.L.INTERACTION  
CSHEG.L.INTERACTION  
HLEGAS.L.INTERACTION

Type of Media

Color Key

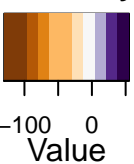

3-0.2.4-0

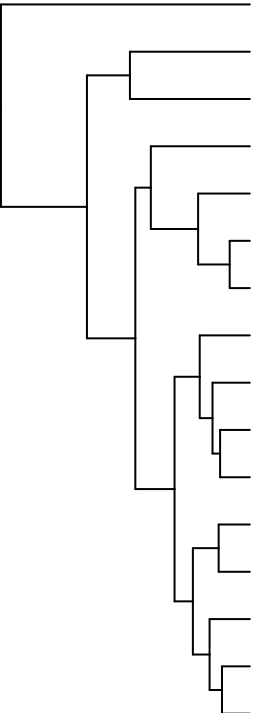

|     |     |      |     |      |      |      |      |    |     |     |     |    |    |    |    |
|-----|-----|------|-----|------|------|------|------|----|-----|-----|-----|----|----|----|----|
| -21 | -38 | -103 | 13  | -130 | -130 | -130 | -130 | 15 | -3  | -5  | -9  | 90 | 90 | 90 | 90 |
| -61 | -49 | 3    | 34  | -130 | -130 | -130 | -130 | 27 | -2  | 9   | -24 | 90 | 90 | 90 | 90 |
| -62 | -33 | -31  | -28 | -130 | -130 | -130 | -130 | 18 | -7  | -2  | -5  | 90 | 90 | 90 | 90 |
| -79 | 6   | 37   | -2  | -130 | -130 | -130 | -130 | 20 | -7  | -5  | -10 | 90 | 90 | 90 | 90 |
| -33 | -2  | 29   | 21  | -130 | -130 | -130 | -130 | 16 | -8  | -14 | -10 | 90 | 90 | 90 | 90 |
| -29 | 28  | 23   | 25  | -130 | -130 | -130 | -130 | 13 | -11 | -5  | -7  | 90 | 90 | 90 | 90 |
| -37 | 27  | 30   | 24  | -130 | -130 | -130 | -130 | 10 | -6  | -10 | -8  | 90 | 90 | 90 | 90 |
| -17 | 7   | 3    | -14 | -130 | -130 | -130 | -130 | 17 | -3  | -1  | 1   | 90 | 90 | 90 | 90 |
| -32 | 11  | 7    | 11  | -130 | -130 | -130 | -130 | 10 | -8  | -8  | -6  | 90 | 90 | 90 | 90 |
| -25 | -3  | 3    | 8   | -130 | -130 | -130 | -130 | 16 | -4  | -3  | 0   | 90 | 90 | 90 | 90 |
| -30 | 0   | -12  | 5   | -130 | -130 | -130 | -130 | 7  | -5  | -2  | -4  | 90 | 90 | 90 | 90 |
| -32 | -7  | 13   | -32 | -130 | -130 | -130 | -130 | 16 | -6  | -11 | -6  | 90 | 90 | 90 | 90 |
| -32 | -22 | 10   | -21 | -130 | -130 | -130 | -130 | 16 | -13 | -13 | -10 | 90 | 90 | 90 | 90 |
| -51 | -6  | 26   | -13 | -130 | -130 | -130 | -130 | 16 | -2  | -3  | -3  | 90 | 90 | 90 | 90 |
| -42 | 5   | 30   | -11 | -130 | -130 | -130 | -130 | 15 | -10 | -13 | -5  | 90 | 90 | 90 | 90 |
| -31 | 3   | 18   | -15 | -130 | -130 | -130 | -130 | 11 | -8  | -9  | -8  | 90 | 90 | 90 | 90 |

YPD.K.Shift  
HLK.INTERACTION  
CSH.K.INTERACTION  
HLAS.K.INTERACTION  
  
YPEG.K.Shift  
HLEG.K.INTERACTION  
CSHEG.K.INTERACTION  
HLEGAS.K.INTERACTION  
  
YPD.L.Shift  
HLL.INTERACTION  
CSH.L.INTERACTION  
HLAS.L.INTERACTION  
  
YPEG.L.Shift  
HLEG.L.INTERACTION  
CSHEG.L.INTERACTION  
HLEGAS.L.INTERACTION

VMA21  
BUD20  
UFD1  
SIN4  
VMA8  
COQ10  
RCS1  
TFP3  
VMA5  
NET1  
ATP11  
YKL118W  
VMA6  
REF2  
PPA1  
YHR039C-B

Gene Name

Type of Media



Color Key

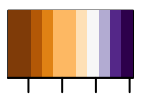

-100 0  
Value

3-0.2.4-2

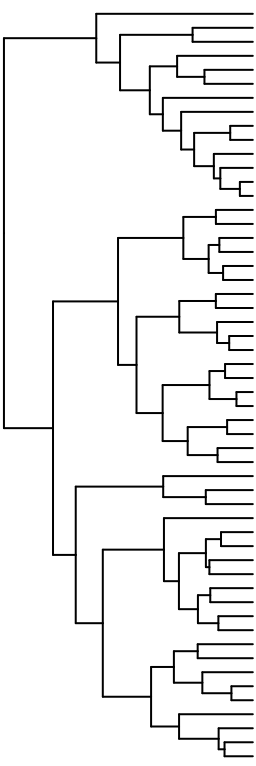

|      |     |     |     |      |      |      |      |    |    |    |    |    |    |    |    |
|------|-----|-----|-----|------|------|------|------|----|----|----|----|----|----|----|----|
| -35  | 13  | -10 | 39  | -130 | -130 | -130 | -130 | 9  | -3 | 3  | 2  | 90 | 90 | 90 | 90 |
| -72  | -28 | 2   | -13 | -130 | -130 | -130 | -130 | 7  | 6  | 1  | 2  | 90 | 90 | 90 | 90 |
| -72  | -33 | 8   | -20 | -130 | -130 | -130 | -130 | 10 | -1 | -2 | 3  | 90 | 90 | 90 | 90 |
| -64  | 0   | -18 | 15  | -130 | -130 | -130 | -130 | 2  | 2  | 3  | 3  | 90 | 90 | 90 | 90 |
| -69  | -22 | -10 | 10  | -130 | -130 | -130 | -130 | 10 | -2 | -1 | 0  | 90 | 90 | 90 | 90 |
| -63  | -32 | -24 | -3  | -130 | -130 | -130 | -130 | 7  | 3  | 0  | -1 | 90 | 90 | 90 | 90 |
| -75  | 3   | -33 | -25 | -130 | -130 | -130 | -130 | 7  | 0  | 8  | 2  | 90 | 90 | 90 | 90 |
| -98  | -11 | -10 | 2   | -130 | -130 | -130 | -130 | 4  | 2  | 4  | 5  | 90 | 90 | 90 | 90 |
| -72  | -1  | 0   | -6  | -130 | -130 | -130 | -130 | 4  | 2  | 2  | 4  | 90 | 90 | 90 | 90 |
| -79  | -5  | 5   | -9  | -130 | -130 | -130 | -130 | 6  | 0  | 4  | 1  | 90 | 90 | 90 | 90 |
| -92  | -9  | -9  | -29 | -130 | -130 | -130 | -130 | 9  | 3  | 5  | 3  | 90 | 90 | 90 | 90 |
| -90  | -3  | -1  | -20 | -130 | -130 | -130 | -130 | 5  | 1  | 3  | 3  | 90 | 90 | 90 | 90 |
| -87  | -13 | -7  | -12 | -130 | -130 | -130 | -130 | 6  | 3  | 5  | 3  | 90 | 90 | 90 | 90 |
| -85  | -12 | -10 | -12 | -130 | -130 | -130 | -130 | 6  | 1  | 3  | 0  | 90 | 90 | 90 | 90 |
| -44  | 32  | 44  | 45  | -130 | -130 | -130 | -130 | 10 | 5  | 7  | 3  | 90 | 90 | 90 | 90 |
| -31  | 29  | 48  | 32  | -130 | -130 | -130 | -130 | 5  | 4  | 0  | 3  | 90 | 90 | 90 | 90 |
| -40  | 32  | 33  | 34  | -130 | -130 | -130 | -130 | 3  | 3  | 2  | 2  | 90 | 90 | 90 | 90 |
| -40  | 35  | 30  | 32  | -130 | -130 | -130 | -130 | 3  | -4 | 0  | -2 | 90 | 90 | 90 | 90 |
| -47  | 23  | 26  | 1   | -130 | -130 | -130 | -130 | 10 | 0  | 0  | 0  | 90 | 90 | 90 | 90 |
| -46  | 34  | 33  | 14  | -130 | -130 | -130 | -130 | 4  | -2 | 0  | 3  | 90 | 90 | 90 | 90 |
| -46  | 1   | 36  | -31 | -130 | -130 | -130 | -130 | 5  | 4  | 1  | 3  | 90 | 90 | 90 | 90 |
| -40  | -10 | 30  | 16  | -130 | -130 | -130 | -130 | 4  | 7  | 0  | 4  | 90 | 90 | 90 | 90 |
| -44  | -4  | 14  | 29  | -130 | -130 | -130 | -130 | 8  | -3 | -2 | -3 | 90 | 90 | 90 | 90 |
| -32  | 1   | 5   | 26  | -130 | -130 | -130 | -130 | 7  | 3  | 2  | 5  | 90 | 90 | 90 | 90 |
| -46  | -6  | 2   | 33  | -130 | -130 | -130 | -130 | 6  | 3  | 5  | 3  | 90 | 90 | 90 | 90 |
| -40  | 20  | 41  | 12  | -130 | -130 | -130 | -130 | 5  | 0  | 0  | -2 | 90 | 90 | 90 | 90 |
| -44  | 34  | 36  | 1   | -130 | -130 | -130 | -130 | 3  | -1 | -1 | 1  | 90 | 90 | 90 | 90 |
| -91  | 23  | 32  | 1   | -130 | -130 | -130 | -130 | 2  | -2 | -1 | -1 | 90 | 90 | 90 | 90 |
| -62  | 19  | 30  | 16  | -130 | -130 | -130 | -130 | 3  | 0  | 1  | 0  | 90 | 90 | 90 | 90 |
| -68  | 23  | 10  | 27  | -130 | -130 | -130 | -130 | 7  | -2 | 2  | -2 | 90 | 90 | 90 | 90 |
| -68  | 17  | 14  | 16  | -130 | -130 | -130 | -130 | 12 | -2 | 4  | -1 | 90 | 90 | 90 | 90 |
| -68  | 28  | 5   | 1   | -130 | -130 | -130 | -130 | 7  | 3  | 6  | 4  | 90 | 90 | 90 | 90 |
| -67  | 20  | -1  | 5   | -130 | -130 | -130 | -130 | 10 | -2 | 0  | 0  | 90 | 90 | 90 | 90 |
| -70  | 12  | 52  | -26 | -130 | -130 | -130 | -130 | 7  | 1  | -1 | 1  | 90 | 90 | 90 | 90 |
| -70  | 37  | 50  | 14  | -130 | -130 | -130 | -130 | 7  | 0  | -3 | 0  | 90 | 90 | 90 | 90 |
| -81  | 45  | 62  | 0   | -130 | -130 | -130 | -130 | 5  | 0  | -1 | 3  | 90 | 90 | 90 | 90 |
| -104 |     | 35  | 52  | -130 | -130 | -130 | -130 | 9  | 3  | 2  | 4  | 90 | 90 | 90 | 90 |
| -71  | 12  | 25  | 33  | -130 | -130 | -130 | -130 | 8  | 4  | 4  | 5  | 90 | 90 | 90 | 90 |
| -73  | 5   | 34  | 30  | -130 | -130 | -130 | -130 | 9  | 3  | -1 | 0  | 90 | 90 | 90 | 90 |
| -77  | 6   | 43  | 39  | -130 | -130 | -130 | -130 | 10 | 1  | 6  | 7  | 90 | 90 | 90 | 90 |
| -85  | 3   | 28  | 41  | -130 | -130 | -130 | -130 | 7  | 0  | -1 | -2 | 90 | 90 | 90 | 90 |
| -80  | 33  | 34  | 31  | -130 | -130 | -130 | -130 | 5  | 1  | 1  | 4  | 90 | 90 | 90 | 90 |
| -94  | 22  | 26  | 1   | -130 | -130 | -130 | -130 | 2  | -1 | 4  | 0  | 90 | 90 | 90 | 90 |
| -85  | 14  | 40  | 14  | -130 | -130 | -130 | -130 | 3  | 1  | 1  | 1  | 90 | 90 | 90 | 90 |
| -91  | 19  | 26  | 13  | -130 | -130 | -130 | -130 | 7  | -1 | 3  | 2  | 90 | 90 | 90 | 90 |
| -88  | -1  | 9   | 20  | -130 | -130 | -130 | -130 | 10 | 2  | 10 | 8  | 90 | 90 | 90 | 90 |
| -88  | 21  | 0   | 15  | -130 | -130 | -130 | -130 | 8  | 0  | 2  | 1  | 90 | 90 | 90 | 90 |
| -72  | 9   | 25  | 11  | -130 | -130 | -130 | -130 | 10 | 4  | 3  | 4  | 90 | 90 | 90 | 90 |
| -78  | -3  | 26  | 14  | -130 | -130 | -130 | -130 | 10 | -1 | -2 | 1  | 90 | 90 | 90 | 90 |
| -78  | -10 | 32  | 10  | -130 | -130 | -130 | -130 | 8  | 2  | 0  | -1 | 90 | 90 | 90 | 90 |
| -118 |     | 14  | 13  | -130 | -130 | -130 | -130 | 7  | 2  | 3  | 2  | 90 | 90 | 90 | 90 |
| -105 | 0   | 17  | -17 | -130 | -130 | -130 | -130 | 9  | 1  | 3  | 2  | 90 | 90 | 90 | 90 |
| -101 | 0   | 12  | -2  | -130 | -130 | -130 | -130 | 4  | 3  | 3  | 2  | 90 | 90 | 90 | 90 |
| -109 | 0   | 5   | -8  | -130 | -130 | -130 | -130 | 9  | 3  | 3  | 3  | 90 | 90 | 90 | 90 |

SNF6  
YDR065W  
GRX5  
MGM1  
DOC1  
YOR199W  
YOR200W  
ATP5  
MRPL25  
RNR4  
SEC6  
PRE6  
MRP20  
MSH1  
SLM5  
ISA2  
RMD9  
NAM2  
COQ5  
PRE6  
HUR1  
EUG1  
CBP6  
VPS33  
YNL170W  
CLC1  
MEF1  
YMR084W  
PIM1  
PPA2  
MRP4  
SNF2  
YDL068W  
BUD25  
CBS2  
TVP18  
COX12  
RIB1  
PRE1  
RML2  
RPL6A  
PCP1  
SLM3  
CAF17  
FZO1  
MRPL36  
CHC1  
PHO85  
ATP15  
SSQ1  
HDA2  
YPR099C  
ATP12  
RNR4  
PUP1

Gene Name

YPD.K.Shift  
HLL.K.INTERACTION  
CSH.K.INTERACTION  
HLA.K.INTERACTION  
YPEG.K.Shift  
HLL.K.INTERACTION  
CSH.K.INTERACTION  
HLEG.AS.K.INTERACTION  
YPD.L.Shift  
HLL.INTERACTION  
CSH.INTERACTION  
HLA.S.INTERACTION  
YPEG.L.Shift  
HLL.INTERACTION  
CSH.INTERACTION  
HLEG.AS.L.INTERACTION

Type of Media

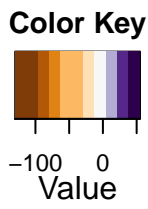

3-0.2.4-3

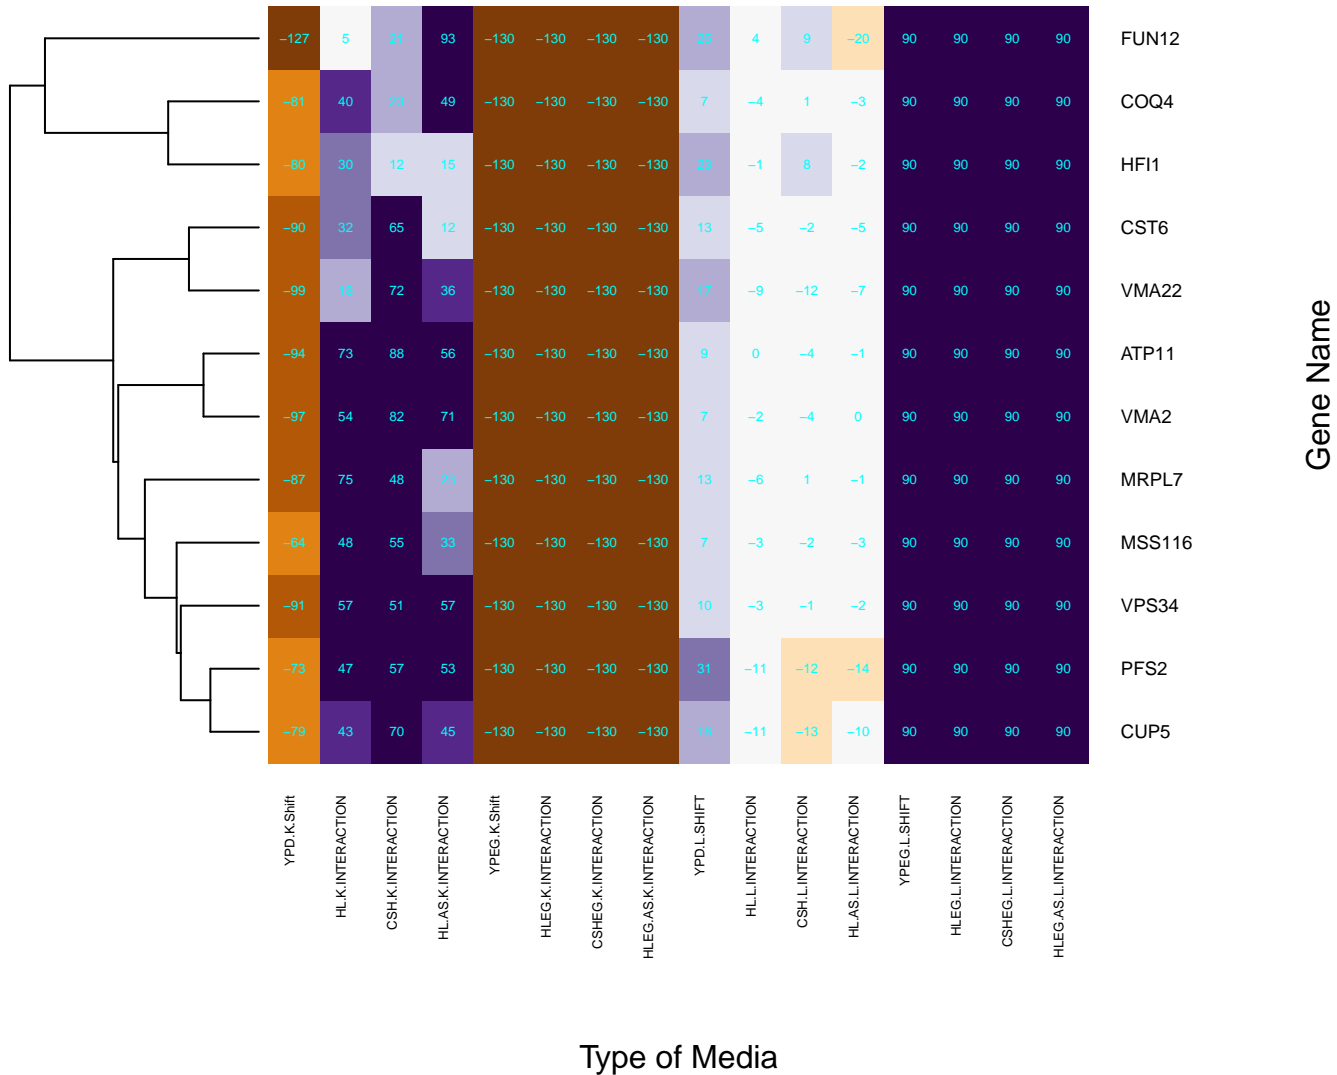



Color Key

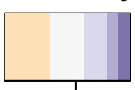

0  
Value

3-0.3.0-0

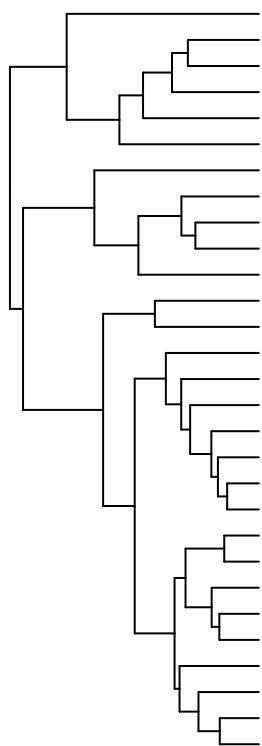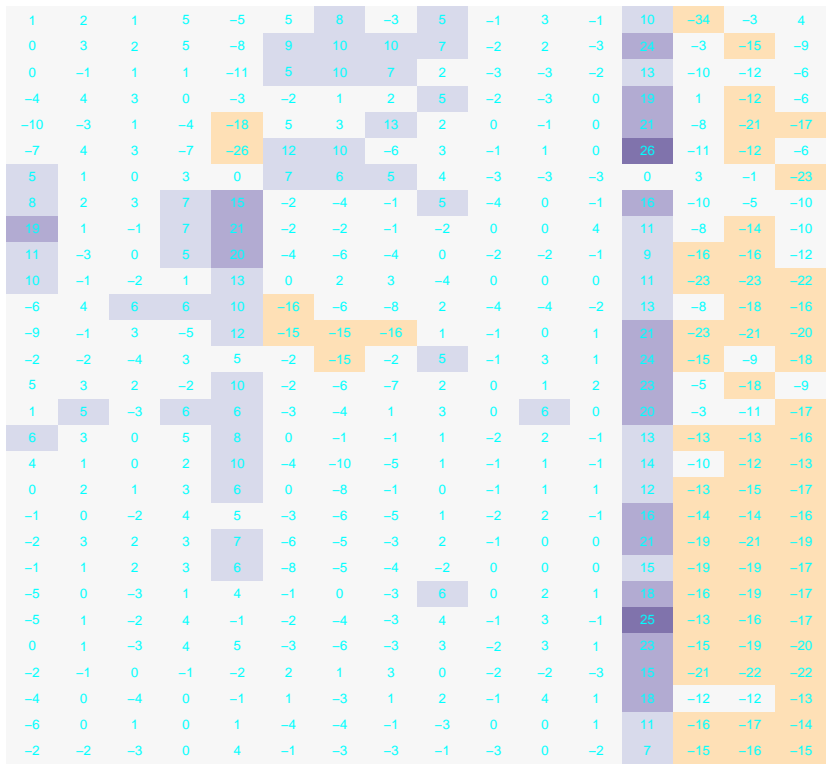

RRT8  
TOP1  
YIL165C  
TAF7  
NKP2  
RVS161  
YER087C-B\_1  
PRP42  
YJL195C  
YBR235W  
ATX1  
YDR134C  
BUL1  
STH1  
SEC3  
BRL1  
DOP1  
PCM1  
URB1  
POP6  
YEL033W  
YPS7  
WBP1  
SNM1  
PNO1  
PHO2  
GLN4  
YBR187W  
RAV2

Gene Name

YPD\_K.Shift  
HLL\_K.INTERACTION  
CSH\_K.K.INTERACTION  
HLAS\_K.INTERACTION  
YPEG\_K.Shift  
HLEG\_K.INTERACTION  
CSHEG\_K.INTERACTION  
HLEG\_ASK.INTERACTION  
YPD\_LL.Shift  
HLL.INTERACTION  
CSH\_LL.INTERACTION  
HLAS\_LL.INTERACTION  
YPEG\_LL.Shift  
HLEG\_LL.INTERACTION  
CSHEG\_LL.INTERACTION  
HLEG\_AS\_LL.INTERACTION

Type of Media

Color Key

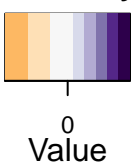

3-0.3.0-1

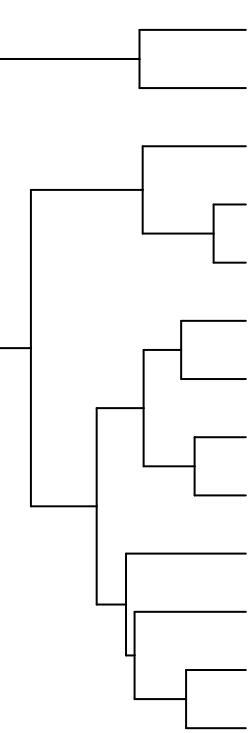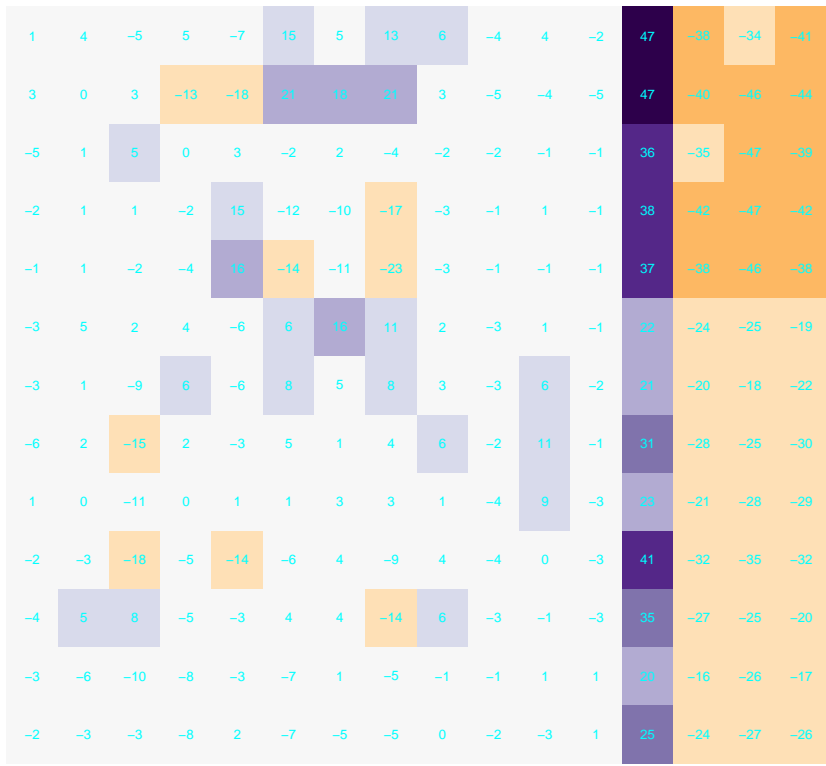

GCD2  
RHO4  
YDR269C  
CCC2  
YDR271C  
PHO86  
SIS1  
FBA1  
UTP5  
GCS1  
BTT1  
RAV1  
SOD1

Gene Name

YPD.K.Shift  
HLK.INTERACTION  
CSH.K.INTERACTION  
HLAS.K.INTERACTION  
YPG.K.Shift  
HLEG.K.INTERACTION  
CSHEG.K.INTERACTION  
HLEG.AS.K.INTERACTION  
YPD.L.Shift  
HLL.INTERACTION  
CSH.L.INTERACTION  
HLAS.L.INTERACTION  
YPG.L.Shift  
HLEG.L.INTERACTION  
CSHEG.L.INTERACTION  
HLEG.AS.L.INTERACTION

Type of Media

Color Key

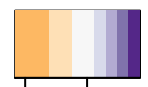

-50 0  
Value

3-0.3.1-0

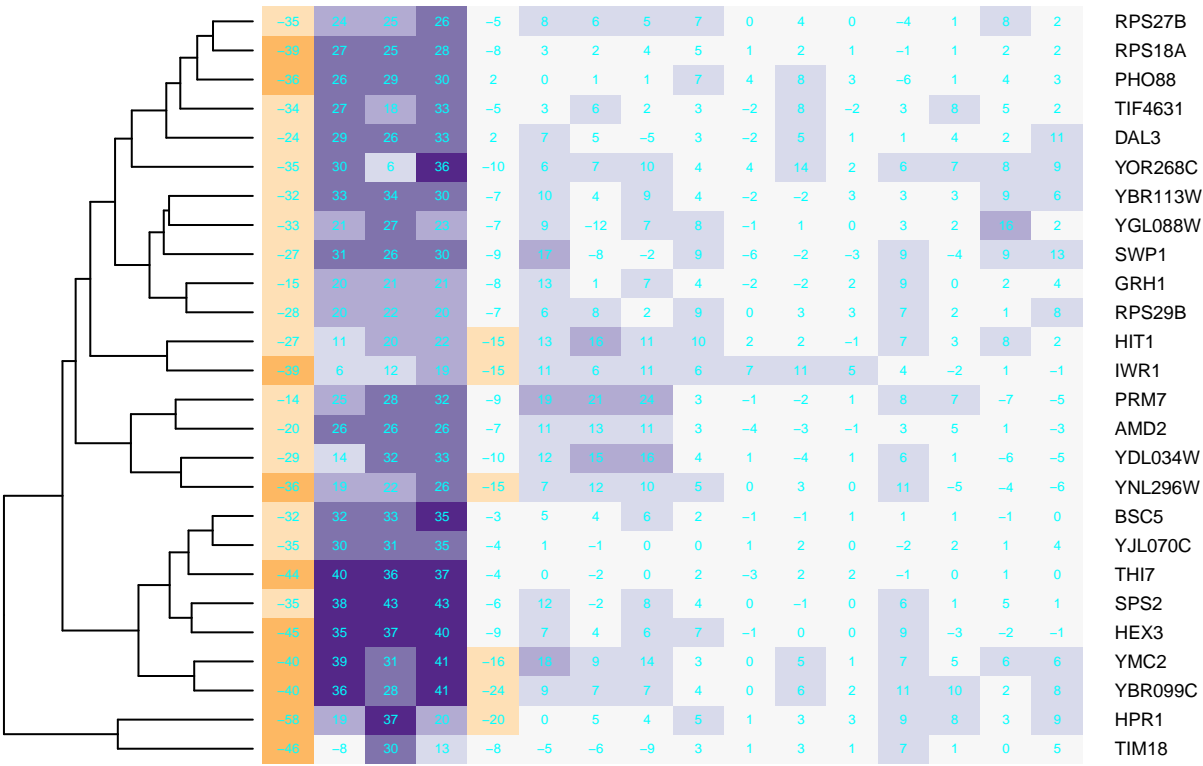

Gene Name

Type of Media

Color Key

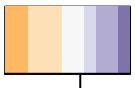

Value

3-0.3.1-1

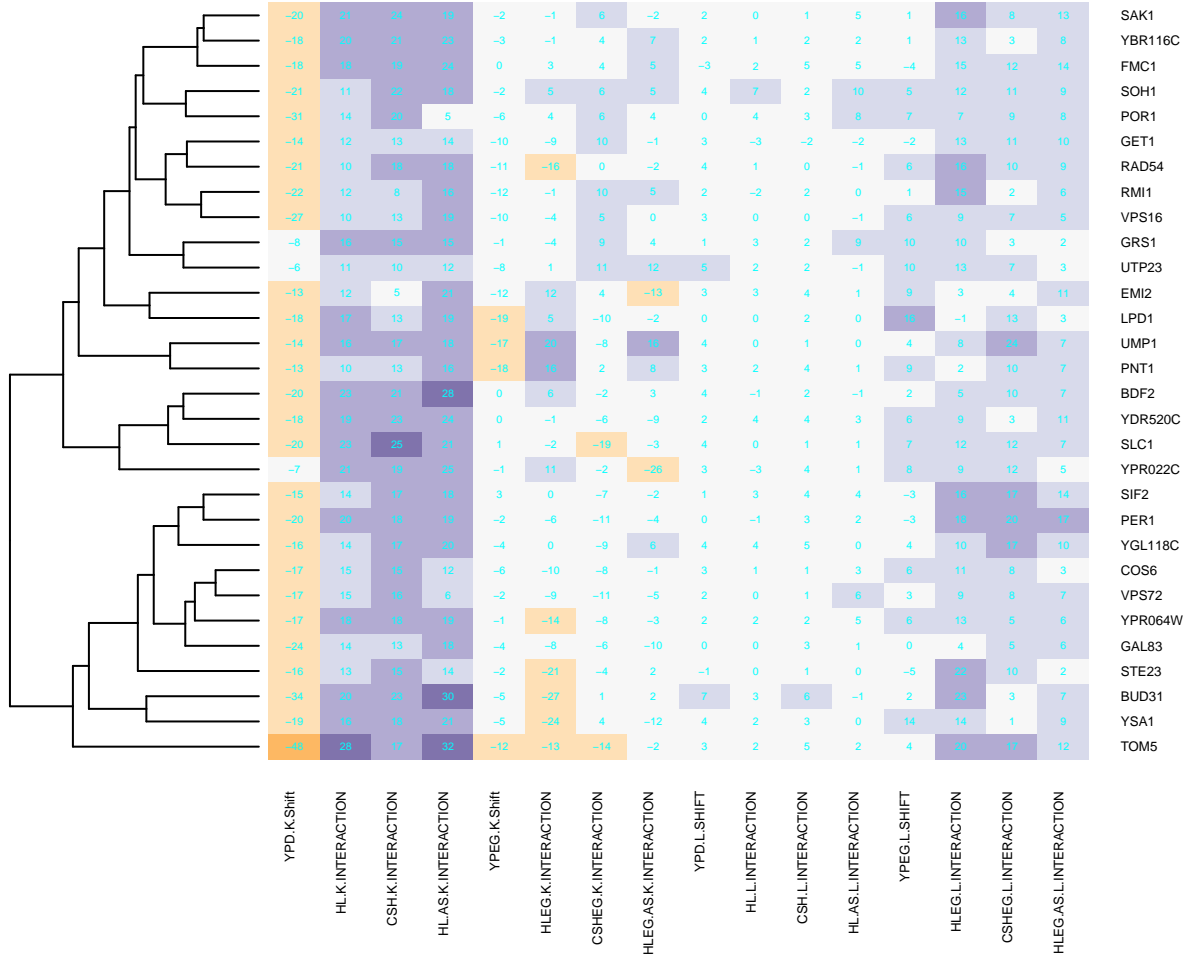

Gene Name

Type of Media

Color Key

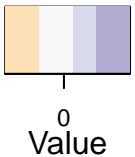

3-0.3.1-2

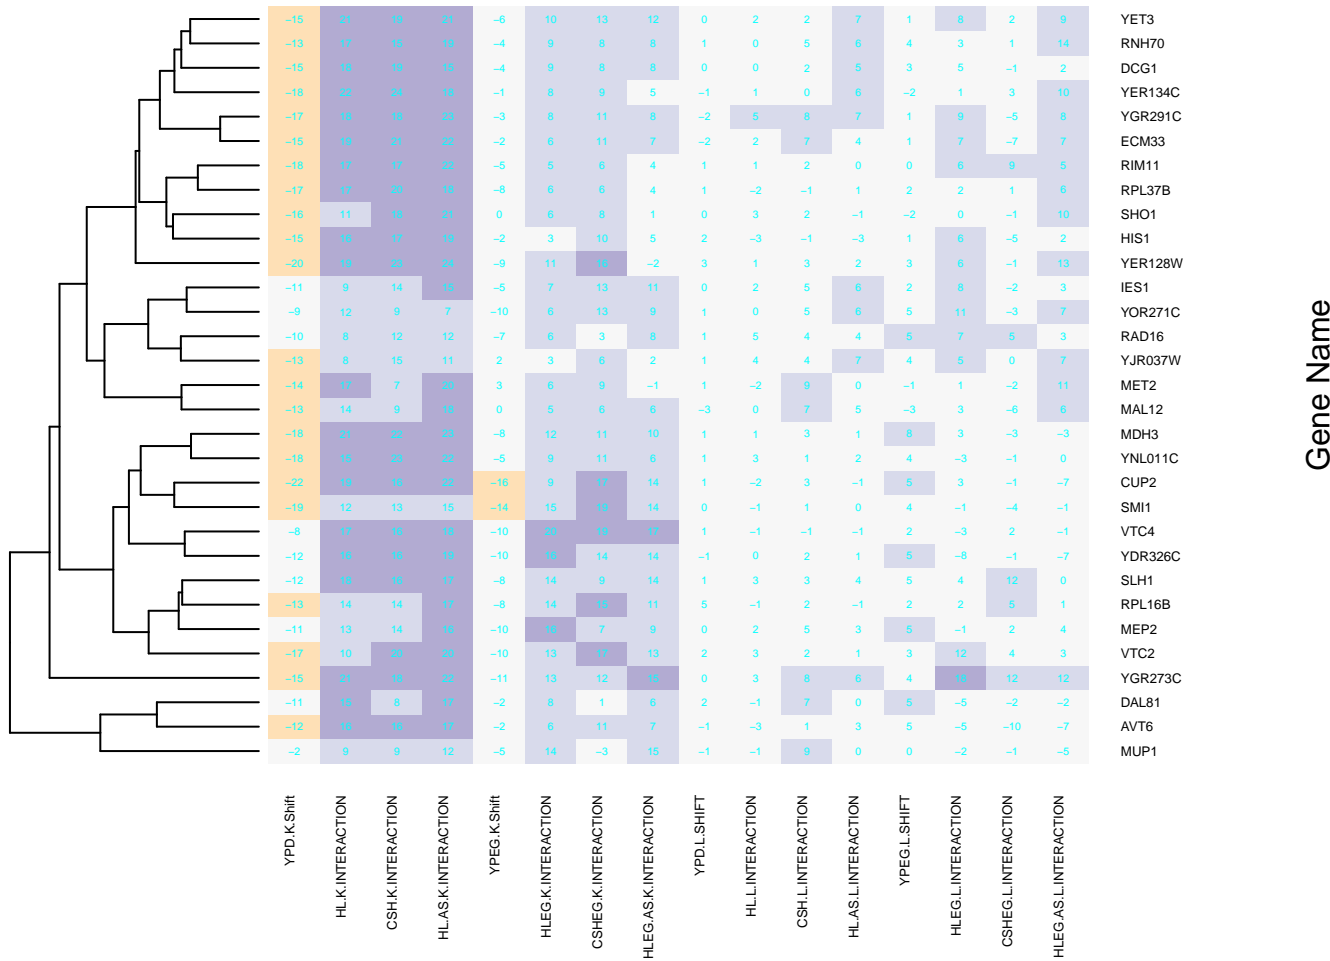

Color Key

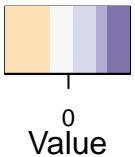

3-0.3.1-3

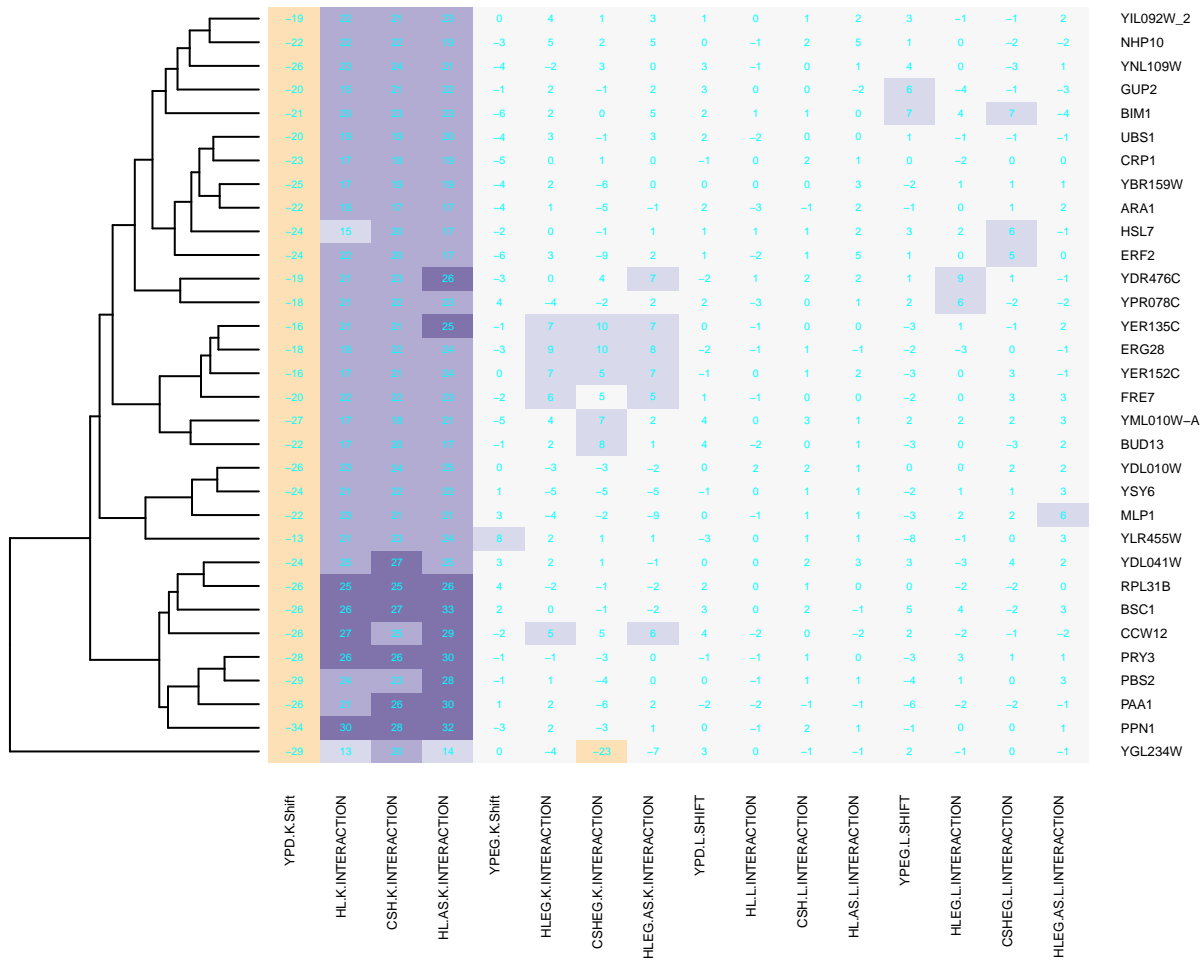

Color Key

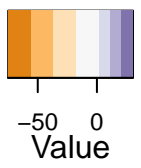

3-0.3.10-0

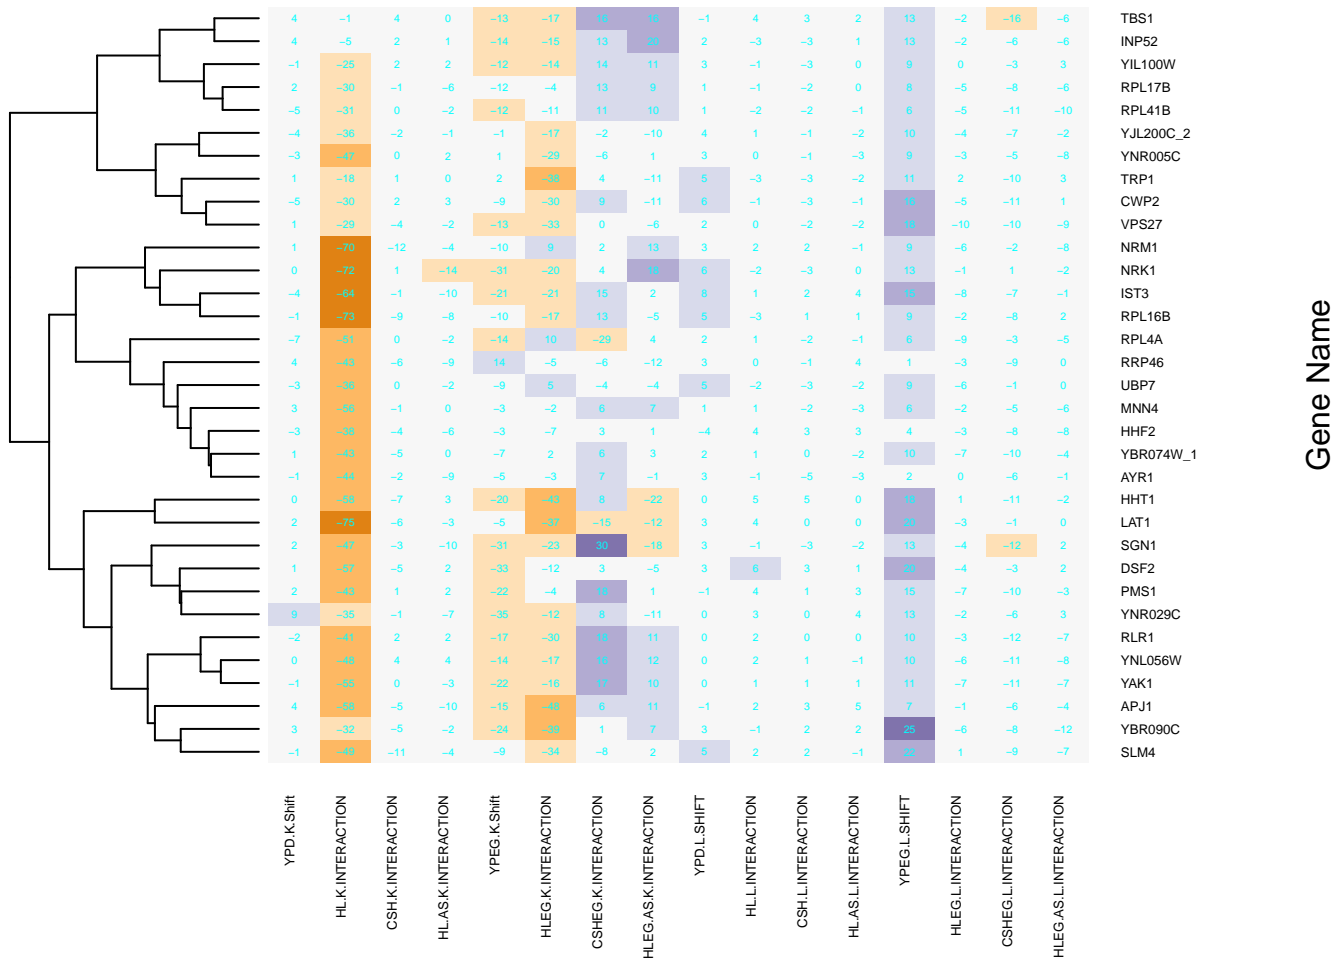

Type of Media

Color Key

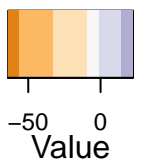

3-0.3.10-1

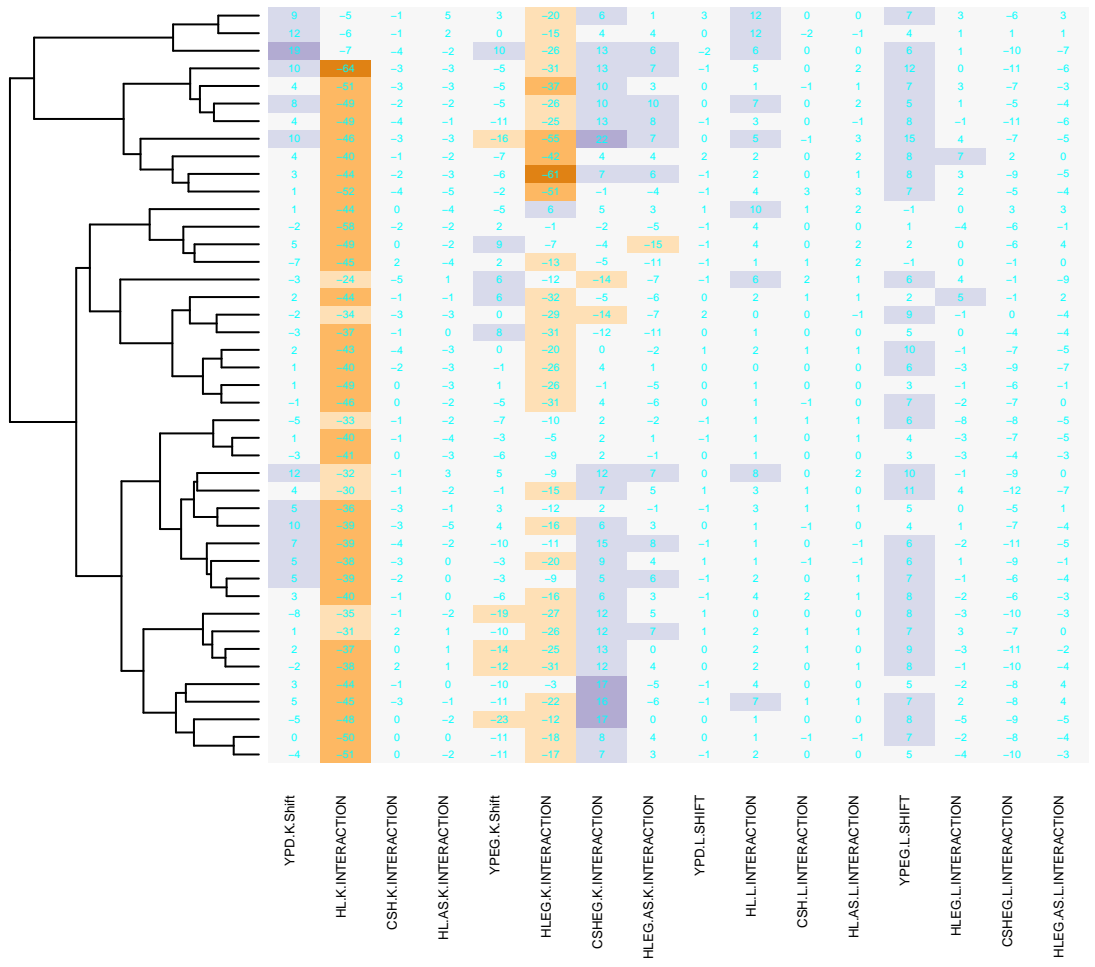

YIL110W  
ESBP6  
MKS1  
CAF4  
PTC4  
PHO91  
YBR062C\_1  
YNR047W  
RHO2  
YNR021W  
SNA3  
KIP1  
TGL2  
AQR1  
YMR135W-A  
TLG1  
YJL206C\_2  
RRD1  
YIL152W  
SOL1  
UBP14  
SSK2  
NIT1  
GSC2  
YGR110W  
ASG1  
PHO23  
TEP1  
YNL134C  
MLF3  
ATG3  
ZRG17  
YIR016W  
YSR3  
HDA1  
YNL058C  
FRE2  
YNL108C  
YBR012C  
YIL108W  
YCR095C  
HSP26  
MSP1

Gene Name

Type of Media

Color Key

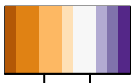

-50  
Value

3-0.3.11-0

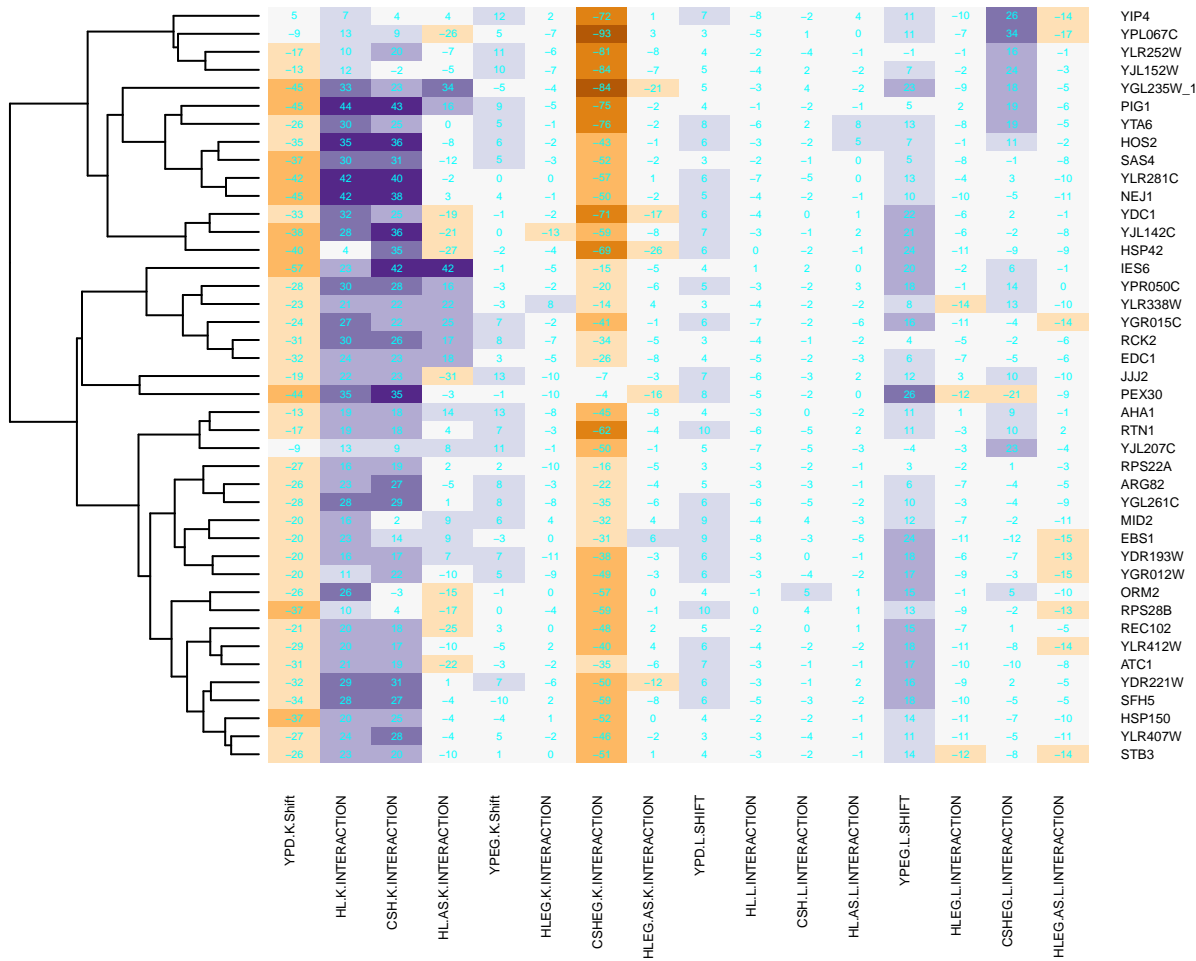

Gene Name

Type of Media

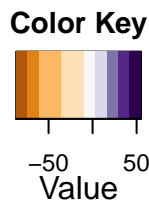

3-0.3.11-1

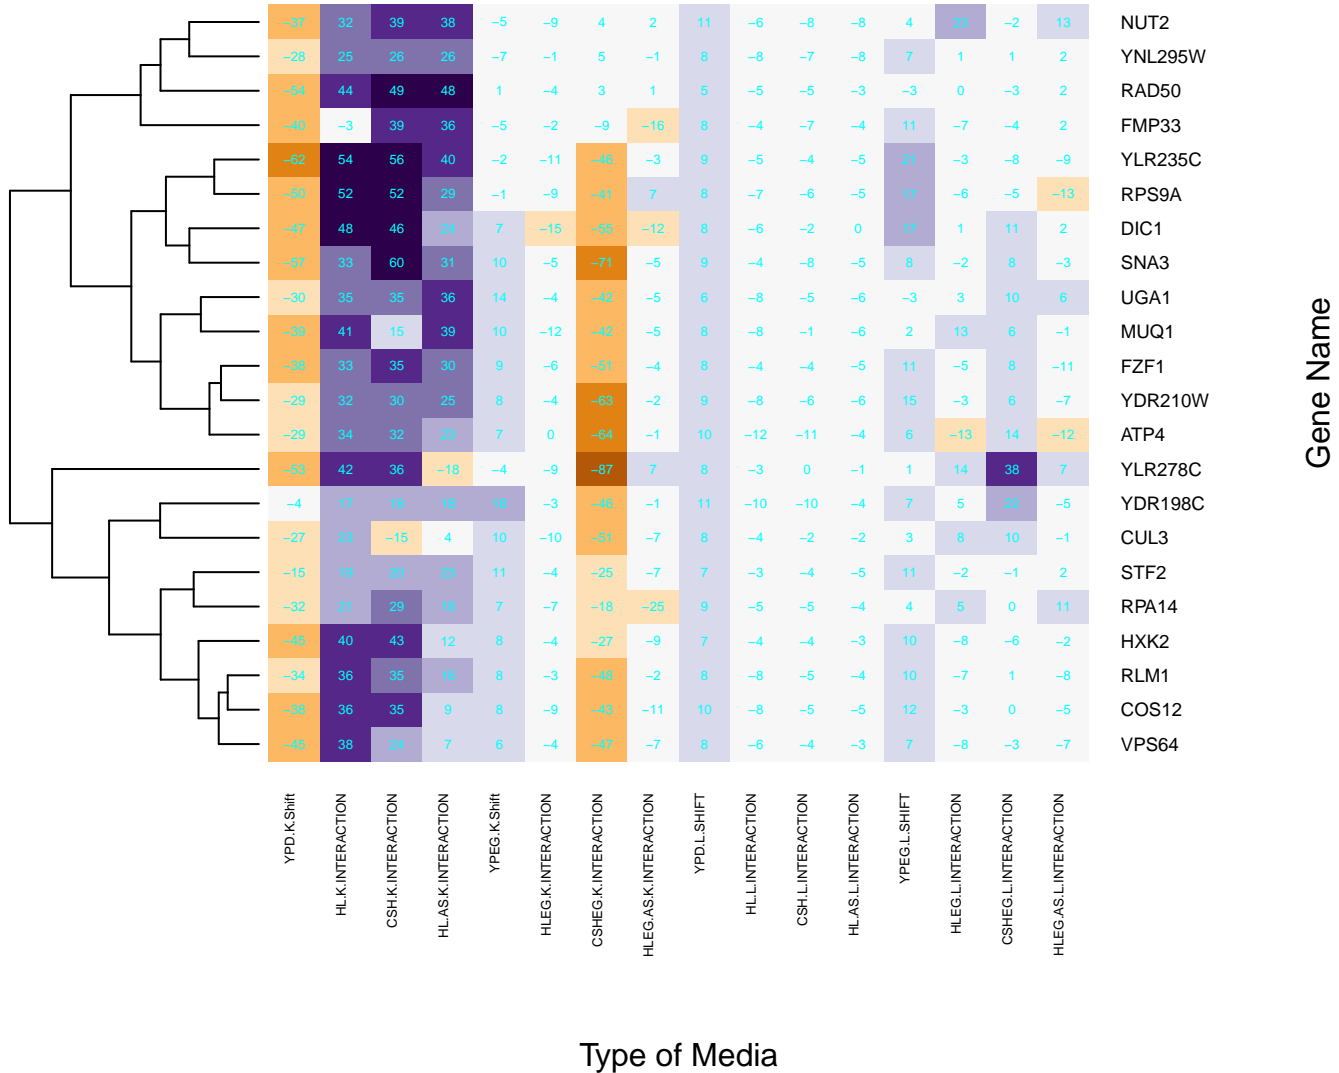

Color Key

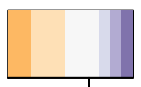

0  
Value

3-0.3.15-0

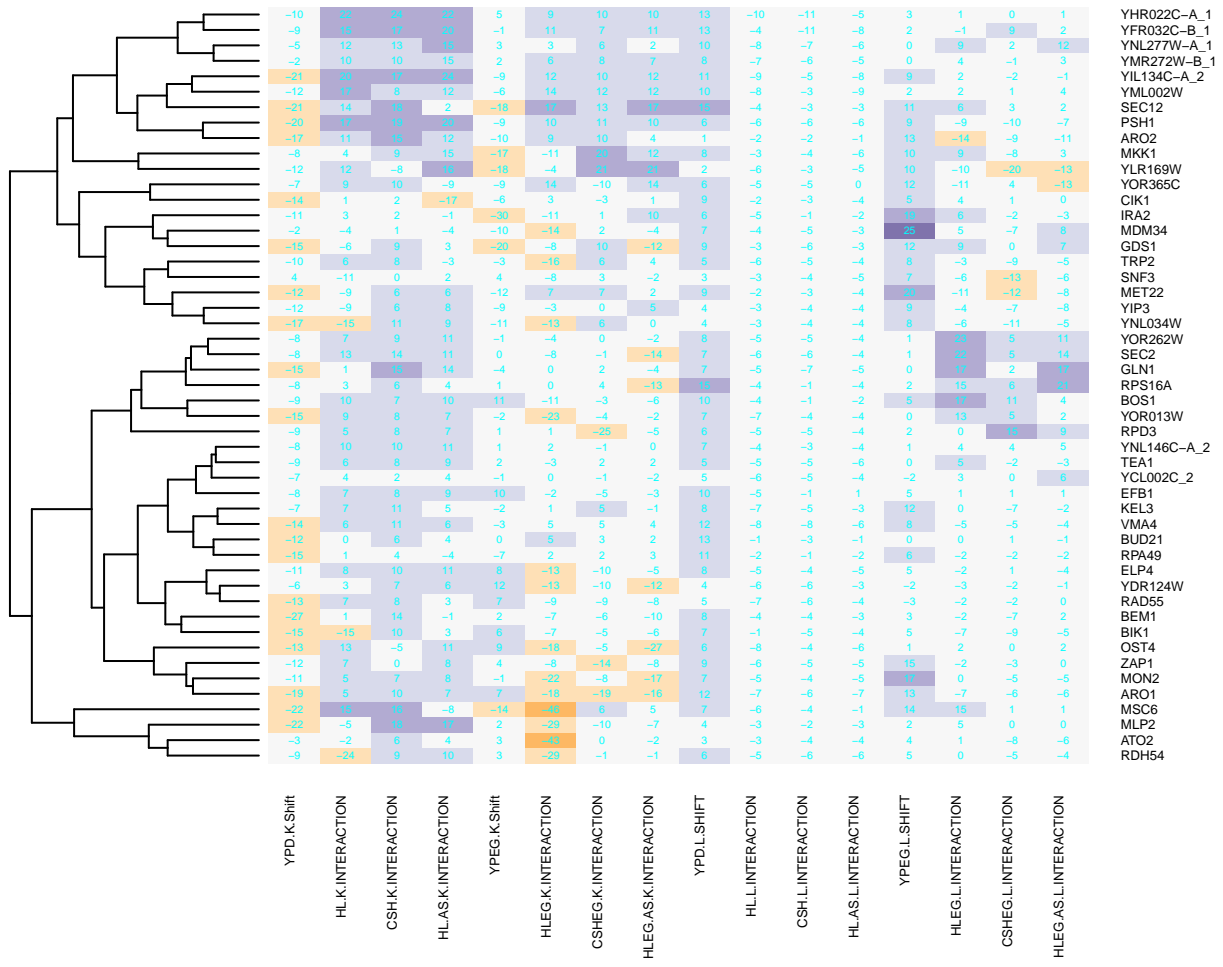

Gene Name

Type of Media

Color Key

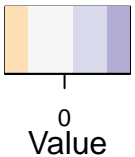

3-0.3.15-1

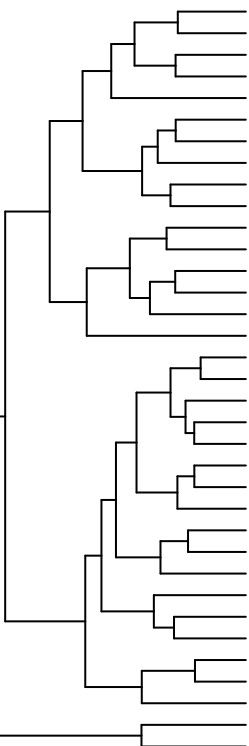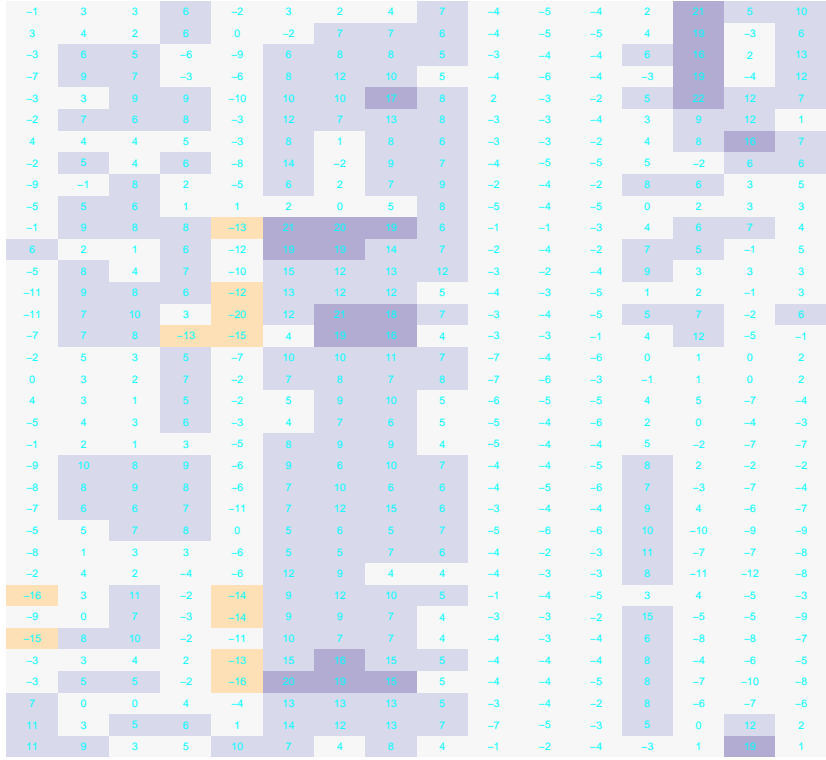

- ISD11
- ESF2
- YMR245W
- HOF1
- SRP68
- DIS3
- YPL119C-A\_1
- YMR134W
- SUI1
- GPI15
- GPI12
- YKL018C-A\_1
- PDS5
- MMT1
- YEH1
- YLL017W
- YDR003W-A\_1
- YDR194W-A\_1
- GCR1
- HCH1
- YPL225W
- TIM10
- GAL4
- YOR082C
- GDH1
- YNL319W
- CTL1
- POM34
- RIM21
- PPR1
- TGL5
- MRPL24
- YMR315W-A\_1
- YJL077W-B\_1
- IPL1

Gene Name

- YPD.K.Shift
- HLK.INTERACTION
- CSH.K.INTERACTION
- HLAS.K.INTERACTION
- YPEG.K.Shift
- HLEG.K.INTERACTION
- CSHEG.K.INTERACTION
- HLEG.AS.K.INTERACTION
- YPD.L.Shift
- HLL.INTERACTION
- CSH.L.INTERACTION
- HLAS.L.INTERACTION
- YPEG.L.Shift
- HLEG.L.INTERACTION
- CSHEG.L.INTERACTION
- HLEG.AS.L.INTERACTION

Type of Media

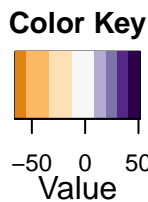

3-0.3.3-0

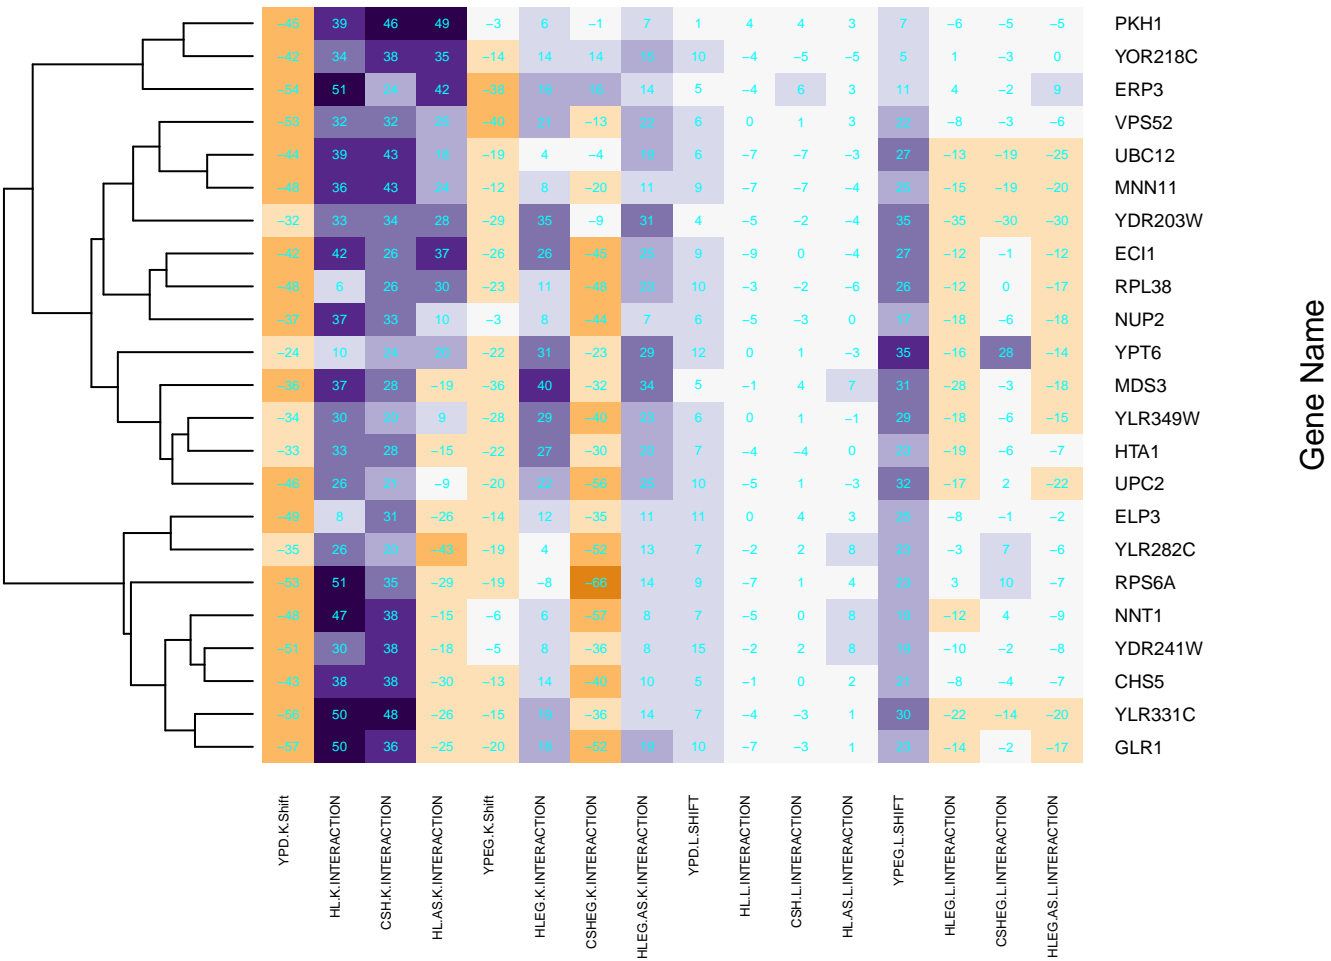

Type of Media

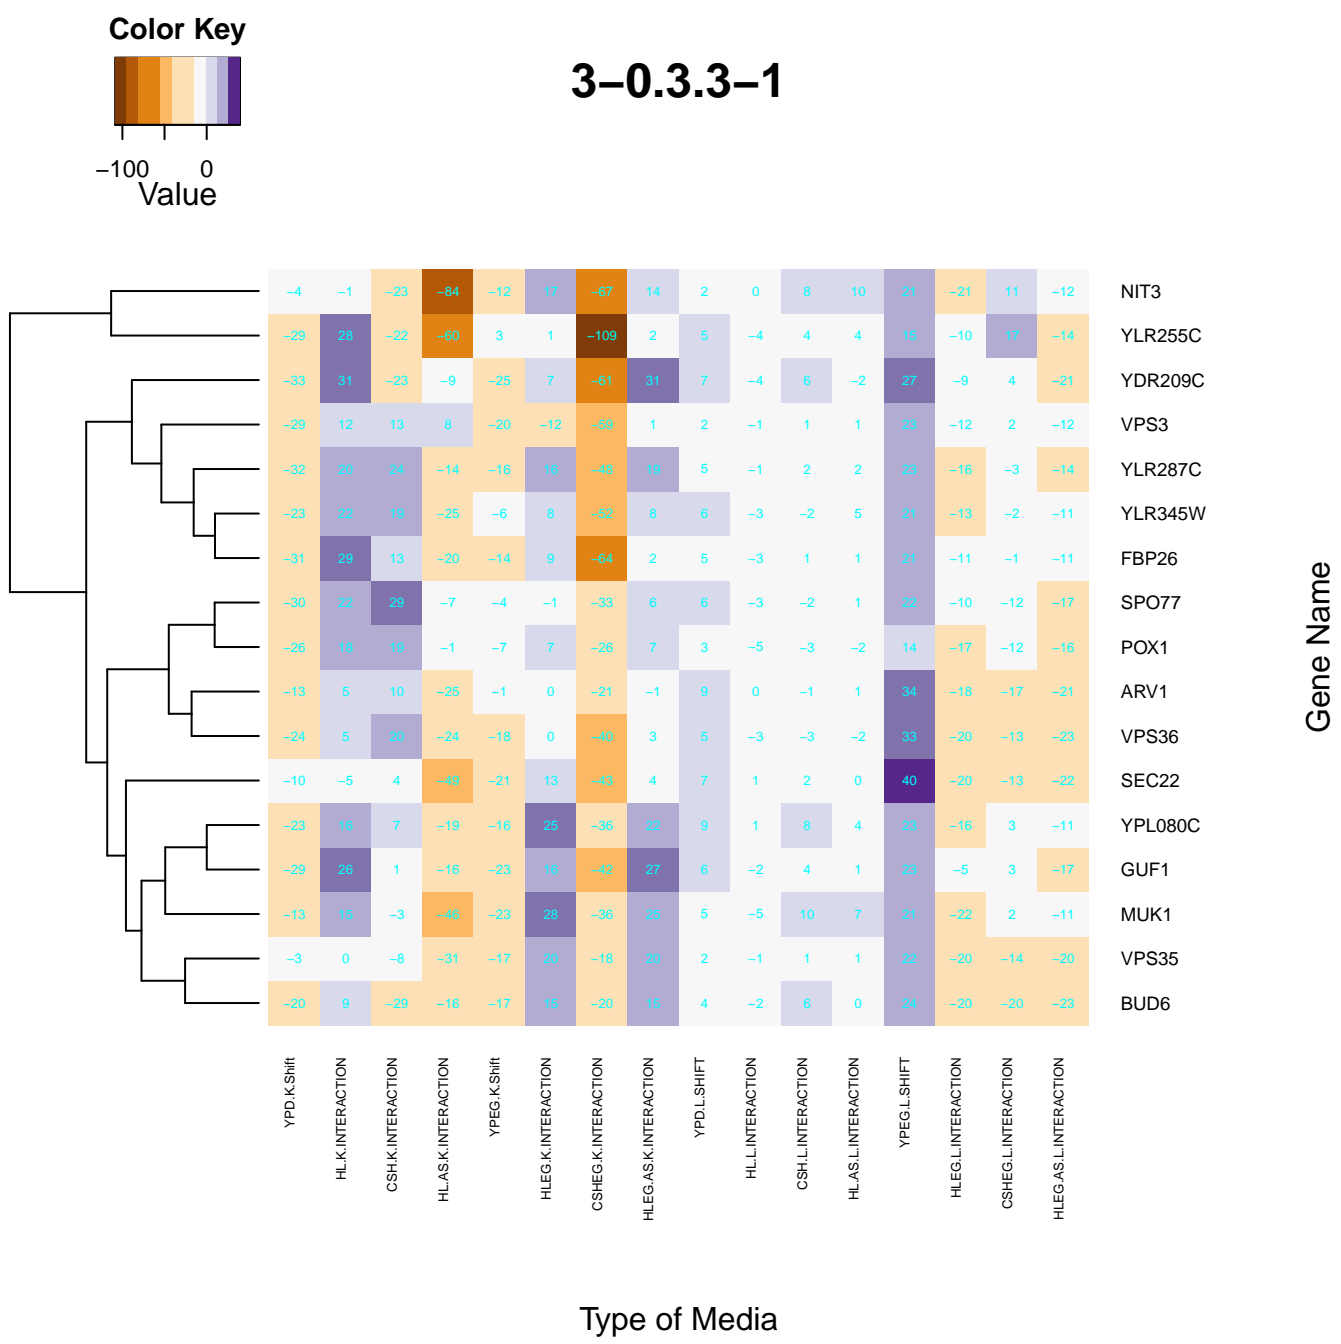

Color Key

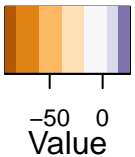

3-0.3.4-0

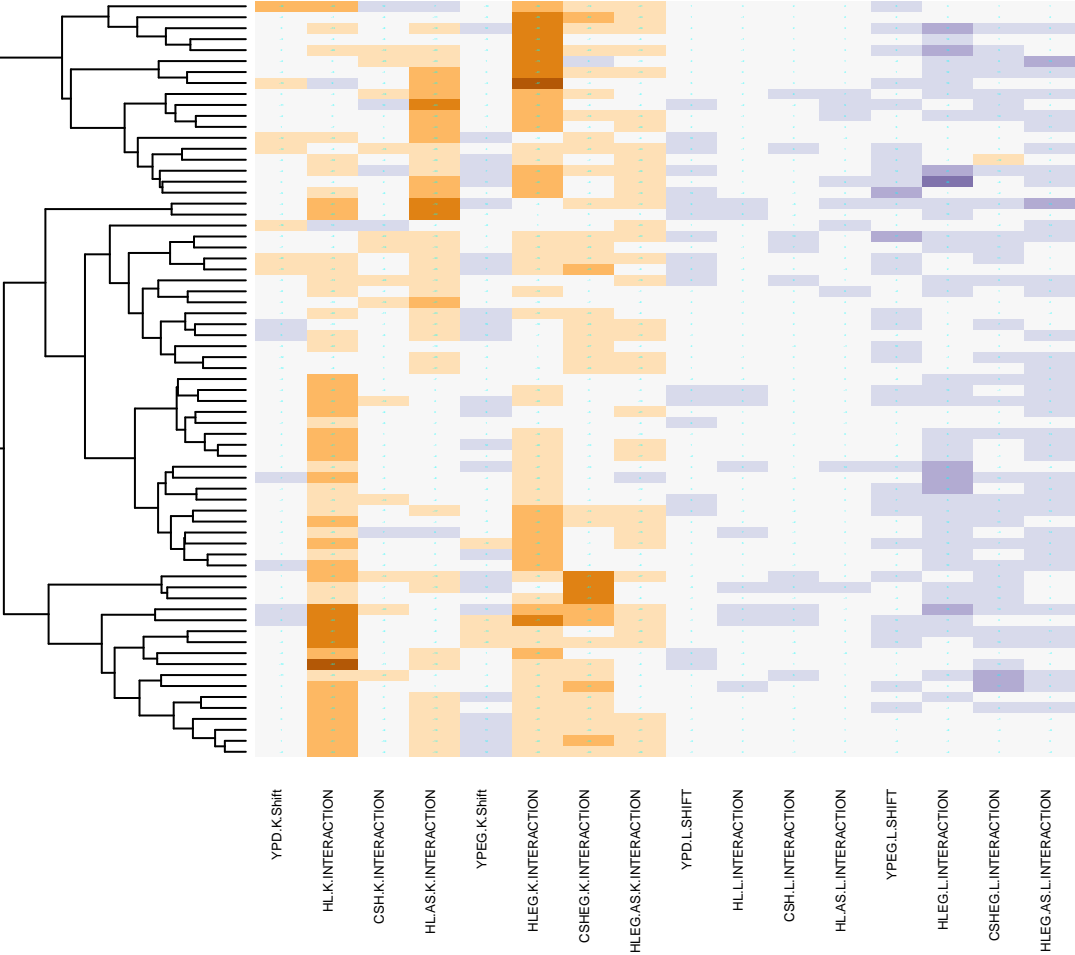

Gene Name

Type of Media

Color Key

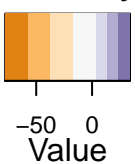

3-0.3.4-1

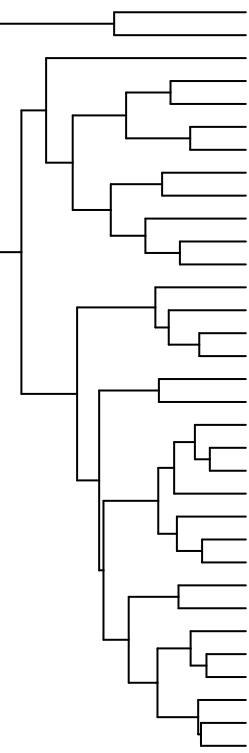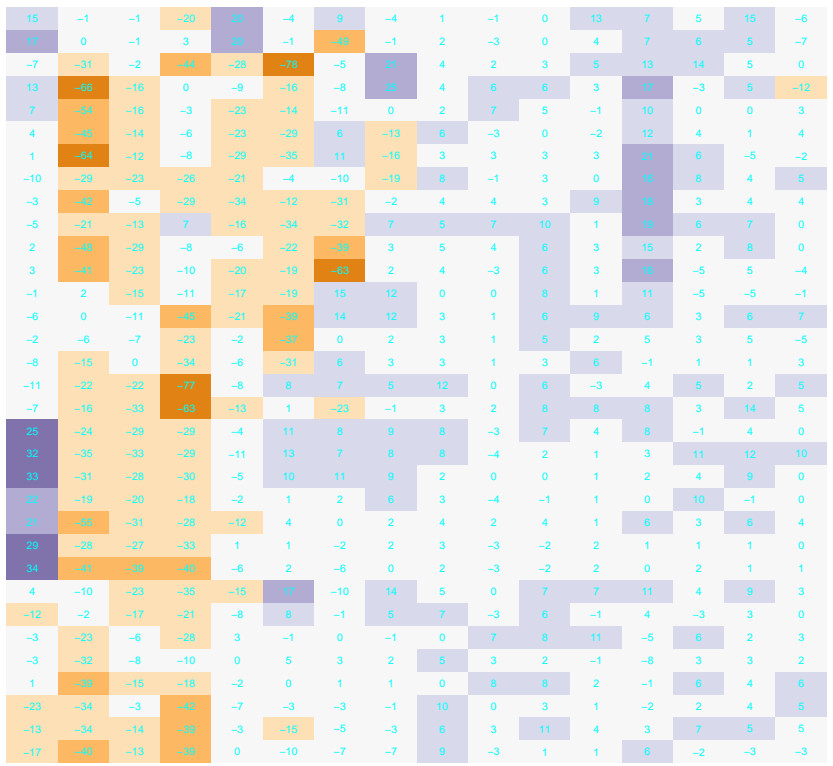

- RPN13
- ADR1
- ASC1
- COG5
- CCZ1
- RNH201
- SFT2
- RPS8A
- VAC7
- RIF1
- TCB2
- NST1
- POM152
- ELP6
- RLF2
- YPR087W
- RPS0B
- RPL21A
- CPR7
- RPL13A
- SWI4
- OSH2
- LYS2
- ATH1
- FAB1
- YHR192W
- SHE4
- FUR4
- YGL072C
- AMD1
- RPS7A
- PRS3
- VID22

Gene Name

- YPD.K.Shift
- HLL.INTERACTION
- CSH.K.INTERACTION
- HLL.K.INTERACTION
- YPG.K.Shift
- HLL.K.INTERACTION
- CSH.K.INTERACTION
- HLL.K.INTERACTION
- YPD.L.Shift
- HLL.INTERACTION
- CSH.L.INTERACTION
- HLL.L.INTERACTION
- YPG.L.Shift
- HLL.INTERACTION
- CSH.L.INTERACTION
- HLL.L.INTERACTION

Type of Media

Color Key

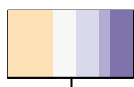

0  
Value

3-0.3.5-0

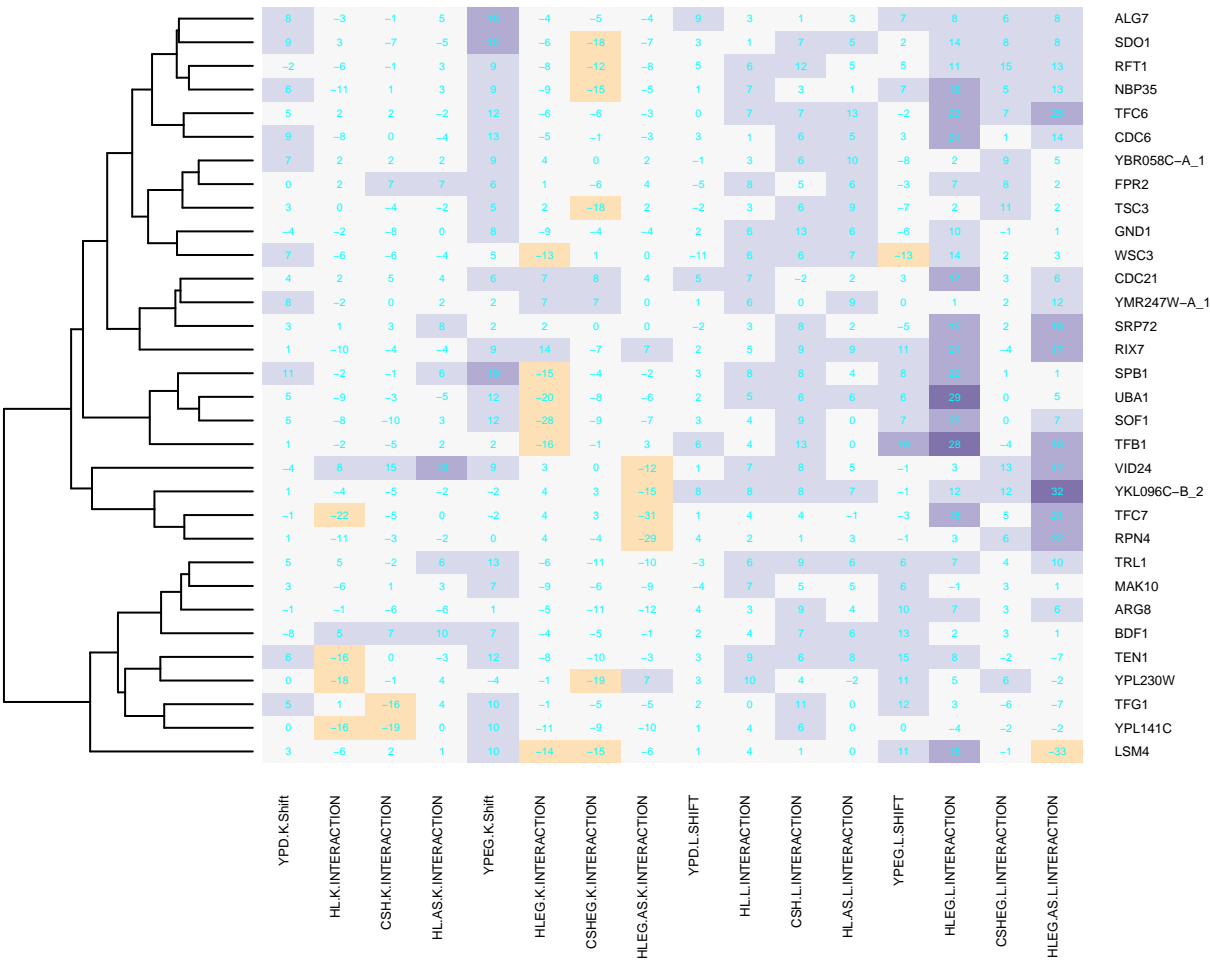

Gene Name

Type of Media

Color Key

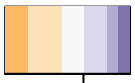

Value

3-0.35-1

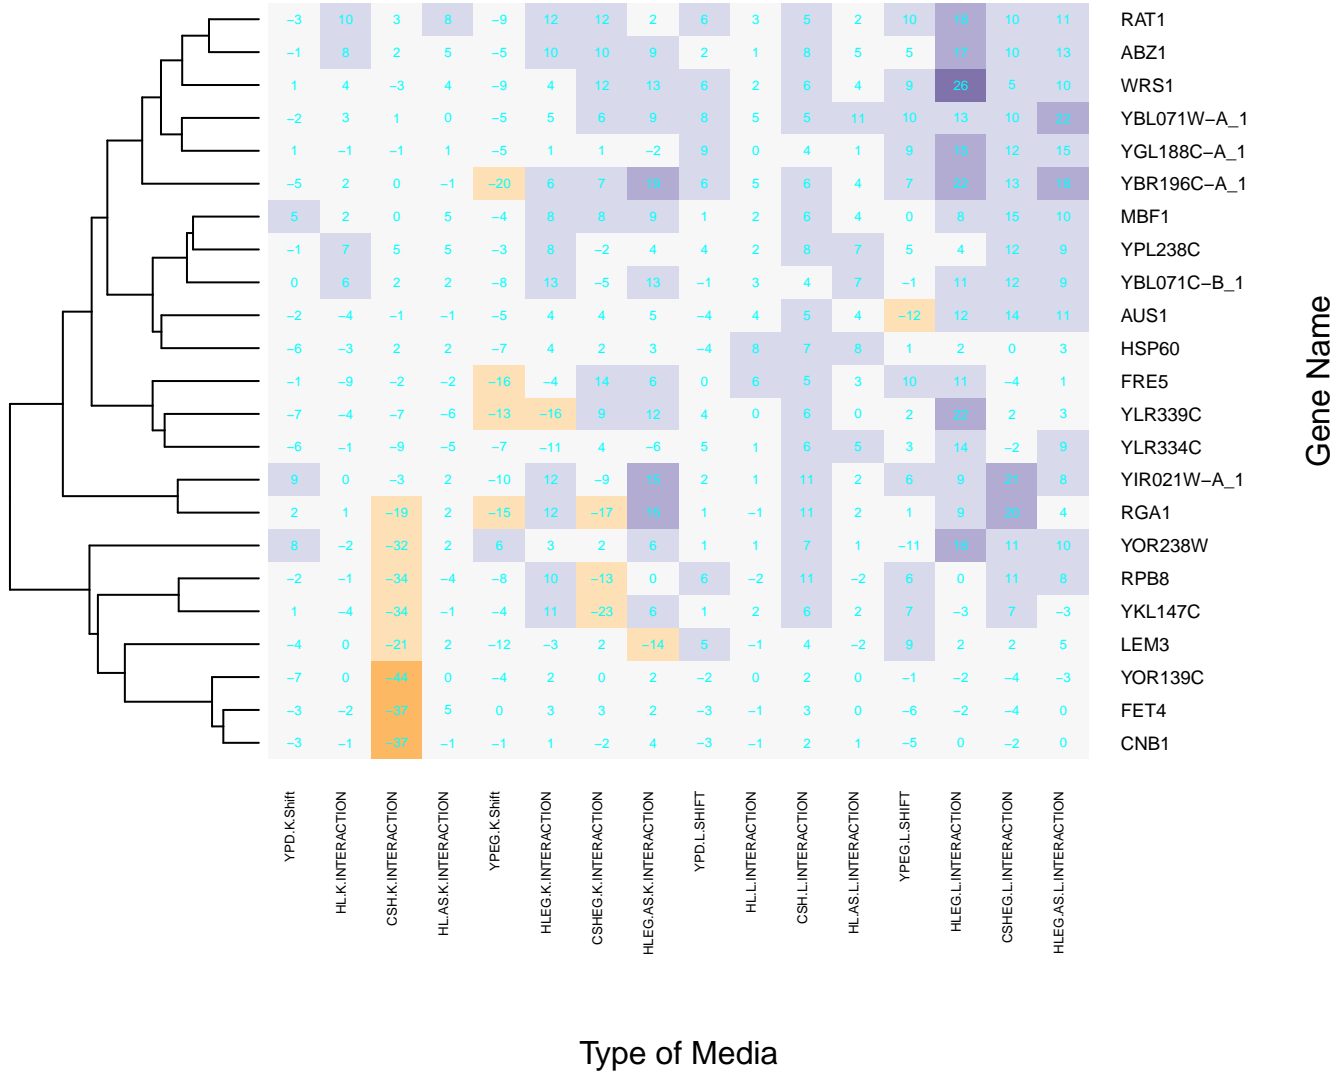

Color Key

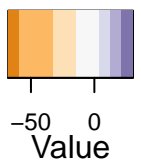

3-0.3.6-0

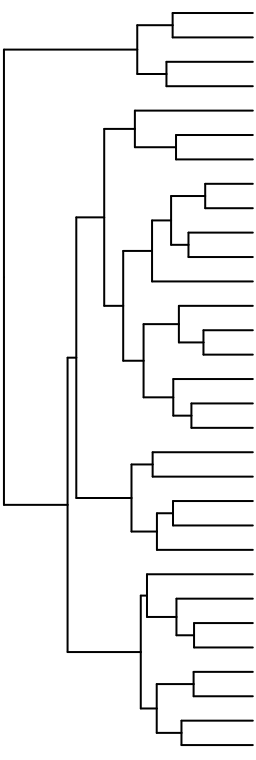

|     |     |     |     |    |     |     |     |    |    |    |    |    |     |     |    |
|-----|-----|-----|-----|----|-----|-----|-----|----|----|----|----|----|-----|-----|----|
| -5  | 6   | -4  | 1   | 8  | -29 | -61 | -11 | 2  | 0  | 5  | 2  | 6  | 8   | -1  | 0  |
| -4  | -10 | -15 | -4  | 5  | -30 | -45 | -20 | 1  | 2  | 5  | 0  | 14 | 3   | -1  | -2 |
| -9  | 1   | -3  | -16 | 6  | -14 | -66 | -27 | 5  | -4 | 1  | 0  | 13 | -6  | 2   | -1 |
| -6  | 1   | -1  | -7  | 1  | -36 | -68 | -28 | 2  | -1 | 0  | 0  | 13 | -8  | -1  | -5 |
| 3   | -8  | 1   | -13 | 10 | -20 | -8  | -3  | 5  | 3  | -3 | 4  | 9  | 30  | -6  | -1 |
| 4   | -15 | 1   | 6   | 12 | -26 | -10 | -11 | 0  | 8  | 2  | 5  | 11 | 13  | -5  | 4  |
| -5  | -9  | 3   | 1   | 5  | -30 | -12 | -20 | 4  | 0  | 0  | 1  | 23 | 10  | 4   | 8  |
| -1  | 4   | 1   | 5   | 2  | -5  | -13 | -3  | 10 | 1  | 3  | 3  | 21 | 11  | -3  | 1  |
| 1   | 3   | 2   | 8   | 10 | -10 | -13 | -9  | 6  | 0  | 1  | 0  | 13 | 15  | 2   | 0  |
| -8  | -5  | -1  | -1  | 8  | -5  | -6  | -5  | 12 | 2  | 2  | 2  | 10 | 4   | -6  | -5 |
| -8  | -1  | -3  | 6   | 5  | -7  | -11 | -15 | 8  | 2  | 2  | 1  | 10 | -5  | -1  | 5  |
| 7   | -1  | 2   | -9  | 8  | -3  | -27 | -8  | 3  | 4  | 1  | 6  | 20 | 6   | 3   | 0  |
| 7   | 3   | 2   | 5   | 7  | -20 | -2  | -3  | 2  | 4  | 0  | 1  | 26 | 12  | -18 | -1 |
| 0   | -6  | 4   | 7   | 6  | -13 | -7  | -13 | 7  | 0  | -2 | 0  | 24 | -1  | -13 | 0  |
| -3  | -5  | 3   | 4   | 8  | -25 | -10 | -16 | 7  | 2  | 0  | 0  | 23 | 6   | -12 | -2 |
| 3   | -2  | -3  | -4  | 4  | -23 | -2  | -28 | 3  | 4  | 8  | 6  | 21 | -2  | -8  | -3 |
| 5   | -3  | -8  | -7  | 2  | -19 | -5  | -11 | 8  | -2 | 2  | 1  | 27 | -1  | -12 | -7 |
| 0   | 2   | 2   | -9  | 7  | -25 | -13 | -12 | 4  | -2 | -1 | -2 | 22 | -7  | -10 | -5 |
| -4  | -4  | -6  | 2   | 2  | -36 | -21 | -8  | 5  | 3  | 4  | 4  | 29 | 10  | 2   | -6 |
| -7  | -14 | 7   | 4   | 6  | -31 | -46 | -10 | 11 | 1  | -2 | 2  | 30 | 8   | 2   | -4 |
| -10 | -7  | -2  | 0   | 3  | -13 | -31 | -16 | 7  | 0  | 1  | 3  | 16 | 10  | 5   | 7  |
| -6  | -22 | -9  | -5  | 7  | -9  | -33 | -8  | 13 | 1  | 4  | 2  | 16 | 7   | 4   | -3 |
| -2  | -18 | -1  | -9  | 8  | -26 | -37 | -19 | 4  | 1  | 2  | -1 | 5  | 15  | 2   | 6  |
| -3  | 3   | 2   | 2   | 9  | -10 | -37 | -27 | -2 | 2  | 2  | 2  | 11 | -8  | -6  | 1  |
| -3  | -4  | -1  | 0   | 10 | -21 | -20 | -24 | 7  | -1 | 0  | 5  | 15 | -3  | -8  | 1  |
| -7  | -3  | 5   | -9  | 11 | -15 | -10 | -17 | 6  | -1 | -3 | -1 | 12 | -11 | -6  | 1  |
| -5  | 0   | 1   | -16 | 10 | -13 | -14 | -30 | 4  | 0  | -3 | 4  | 8  | -7  | -7  | 7  |
| -6  | -13 | 0   | -11 | 6  | -5  | -36 | -16 | 2  | 2  | 5  | 1  | 10 | -7  | -4  | 2  |
| -2  | -23 | 1   | -14 | 6  | -16 | -37 | -24 | 2  | 2  | 0  | -1 | 15 | -8  | -4  | -3 |
| -16 | -17 | 1   | -11 | 2  | -17 | -21 | -20 | 3  | 1  | 0  | 3  | 14 | -4  | -4  | 0  |
| -14 | -9  | -3  | -11 | 12 | -28 | -32 | -29 | 4  | 0  | 2  | 0  | 10 | -3  | -3  | -5 |

- VBA3
- TAN1
- PAM17
- GET2
- NCP1
- RRN7
- YDL163W
- CLF1
- SMC1
- RPC17
- XRS2
- RPS20
- GCD14
- TSC10
- FOL2
- UFD2
- SPC72
- NAM7
- CIN8
- TIM17
- YDR526C
- RPF2
- PIG2
- PCL6
- PGD1
- SPF1
- YBR246W
- SET7
- FET5
- BUB1
- RAD6

Gene Name

- YPD.K.SHIFT
- HLK.INTERACTION
- CSH.K.INTERACTION
- HLAS.K.INTERACTION
- YPG.K.SHIFT
- HLG.K.INTERACTION
- CSHEG.K.INTERACTION
- HLEGAS.K.INTERACTION
- YPD.L.SHIFT
- HLL.INTERACTION
- CSH.L.INTERACTION
- HLAS.L.INTERACTION
- YPG.L.SHIFT
- HLG.L.INTERACTION
- CSHEG.L.INTERACTION
- HLEGAS.L.INTERACTION

Type of Media

Color Key

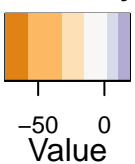

3-0.3.6-1

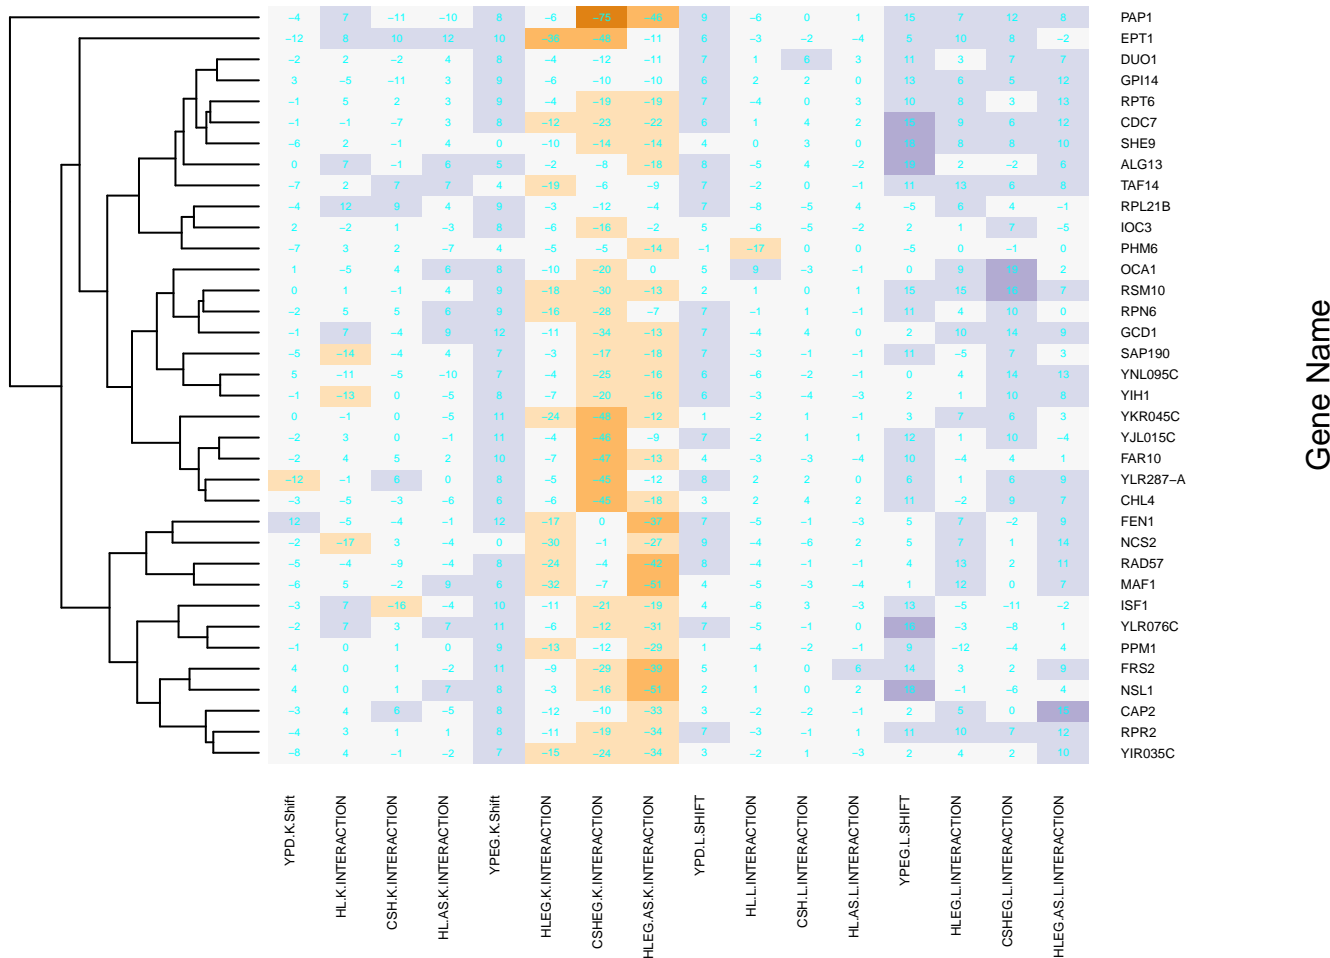

Color Key

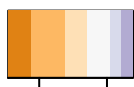

-50 0  
Value

3-0.3.7-0

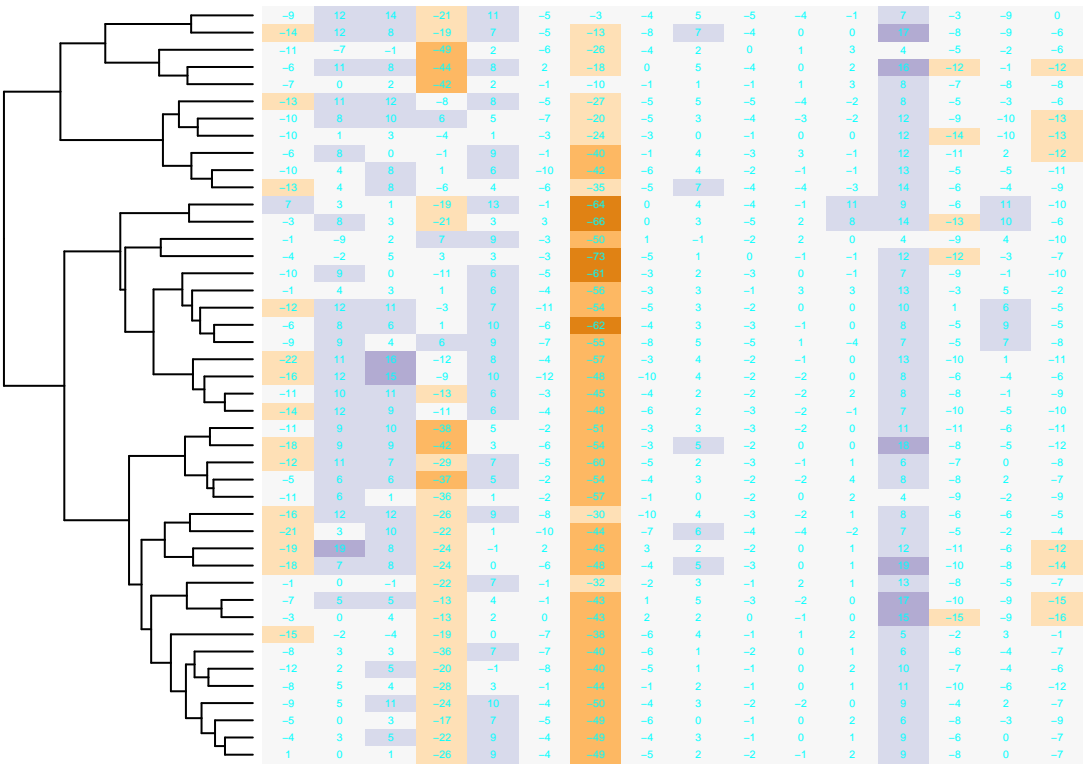

|           |
|-----------|
| GCN20     |
| TIF2      |
| YLR374C   |
| MNT2      |
| CTF3      |
| PDR8      |
| URA2      |
| YLR392C   |
| MRS3      |
| YJL144W   |
| TOP3      |
| YLR290C   |
| YPL071C   |
| MAS1      |
| RIM101    |
| PDE1      |
| YDR239C   |
| YLR269C   |
| NMA1      |
| YDR185C   |
| SET2      |
| YDR199W   |
| YGR026W   |
| SSP120    |
| TRM82     |
| YDR154C   |
| CIS3      |
| SPR28     |
| ARO8      |
| YGL260W   |
| SUR4      |
| YGR011W_1 |
| CWC15     |
| YJL135W   |
| YGL214W_1 |
| ASG7      |
| RCY1      |
| BNA5      |
| YGL217C_1 |
| YLR232W   |
| TPK1      |
| PLP1      |
| YUR1      |
| YLR253W   |

Gene Name

Type of Media

Color Key

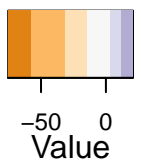

3-0.3.7-1

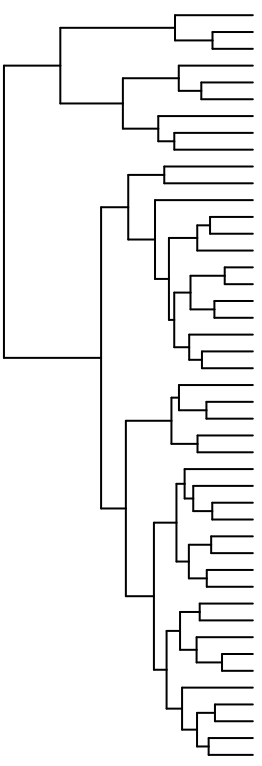

|     |     |     |     |    |     |     |     |    |    |    |    |    |     |     |     |
|-----|-----|-----|-----|----|-----|-----|-----|----|----|----|----|----|-----|-----|-----|
| -2  | 2   | 2   | -16 | 9  | -13 | -15 | -5  | 2  | -1 | 0  | 4  | 16 | -3  | -8  | -13 |
| 0   | -3  | -1  | -32 | 6  | -15 | -6  | -8  | 0  | 0  | -1 | 6  | 4  | -8  | -6  | -7  |
| -1  | -2  | -2  | -19 | 8  | -9  | -10 | -8  | -1 | 1  | -1 | 5  | 10 | -14 | -15 | -11 |
| -10 | 9   | 7   | -9  | 9  | -10 | -10 | -5  | 6  | 0  | 5  | 7  | 13 | 1   | 11  | -3  |
| -8  | -1  | -13 | -6  | 1  | -12 | -41 | -8  | 4  | -2 | 2  | -1 | 12 | -4  | 11  | -5  |
| -14 | 4   | -8  | -4  | 7  | -22 | -40 | -10 | 5  | -2 | 0  | -2 | 14 | -1  | 0   | -7  |
| -4  | 3   | -20 | -29 | 7  | -6  | -75 | -12 | 3  | -1 | 5  | 3  | 15 | -8  | 8   | -3  |
| -1  | -8  | -3  | -36 | 3  | -1  | -62 | -12 | 4  | 2  | 1  | 6  | 17 | -15 | 1   | -6  |
| -11 | -6  | -22 | -34 | 4  | -6  | -43 | -5  | 5  | 0  | 6  | 3  | 8  | -2  | -1  | -7  |
| -24 | 11  | 21  | 12  | 5  | -15 | -10 | -15 | 1  | 1  | 1  | 3  | 19 | -13 | -14 | -11 |
| -14 | 7   | 4   | 13  | 5  | -16 | -35 | -7  | 5  | -2 | 0  | -4 | 20 | -4  | -9  | -11 |
| -11 | 4   | -16 | 3   | 6  | -9  | -10 | -7  | 3  | -5 | 9  | -3 | 3  | -9  | -6  | -6  |
| -2  | 7   | 8   | 10  | 12 | -2  | -6  | -3  | 2  | 3  | 4  | 1  | 21 | -12 | -9  | -17 |
| 0   | 2   | 1   | 5   | 10 | -7  | -13 | -5  | 4  | 0  | 2  | 2  | 15 | -4  | -8  | -13 |
| -4  | 10  | 0   | 1   | 8  | -4  | -17 | -5  | -2 | -1 | 2  | 2  | 10 | -15 | -15 | -15 |
| 2   | 2   | 0   | -10 | 6  | -4  | -8  | -4  | 2  | 4  | 8  | 1  | 10 | -5  | 1   | -3  |
| -1  | 2   | 0   | -14 | 5  | -5  | -10 | -1  | 3  | 4  | 7  | 0  | 15 | -5  | -1  | -11 |
| 0   | 2   | -7  | 2   | 12 | -6  | -21 | -7  | 6  | -3 | 4  | 3  | 13 | 1   | 3   | -8  |
| -1  | 2   | 1   | -5  | 9  | -8  | -23 | -8  | 6  | -4 | -4 | 0  | 15 | -1  | -2  | -9  |
| -1  | -1  | -8  | 0   | 2  | -20 | -9  | -2  | 4  | -2 | 4  | 4  | 19 | -1  | -6  | -6  |
| -7  | 7   | 1   | 9   | 10 | -14 | -7  | -11 | 4  | 0  | 10 | 0  | 17 | -5  | -12 | -11 |
| -7  | 0   | 3   | 1   | 6  | -16 | -12 | -14 | 1  | 0  | -1 | 0  | 13 | -14 | -11 | -11 |
| -8  | -8  | 13  | -19 | 14 | -12 | -6  | -7  | 5  | 0  | -1 | 2  | 15 | -1  | -8  | -9  |
| -13 | -8  | 4   | -3  | 5  | -5  | -6  | -9  | 11 | 1  | -3 | 5  | 12 | -8  | -11 | -10 |
| -4  | -10 | 0   | -2  | 6  | -7  | -3  | -9  | 5  | -3 | -4 | -5 | 16 | -14 | -14 | -9  |
| -12 | -9  | -9  | -8  | -4 | -12 | -7  | -6  | 1  | -1 | 1  | 0  | 15 | -10 | -9  | -10 |
| -3  | -17 | -10 | -20 | 1  | -8  | -11 | -10 | 5  | -3 | -2 | -2 | 9  | -6  | -6  | -5  |
| 0   | -4  | -5  | -9  | 7  | -6  | -33 | -7  | -3 | 1  | 2  | 1  | 13 | -20 | -16 | -17 |
| -3  | -2  | -1  | -3  | 7  | -2  | -25 | -11 | 3  | 1  | 3  | 1  | 17 | -15 | -2  | -7  |
| 2   | 0   | -4  | -6  | 8  | -5  | -27 | -9  | 3  | 0  | 5  | 6  | 19 | -8  | 0   | -3  |
| -5  | -2  | 2   | -13 | 8  | -6  | -27 | -8  | 4  | 1  | 3  | 4  | 21 | -14 | -5  | -8  |
| -1  | 0   | -1  | 0   | 7  | -12 | -34 | -4  | 3  | -1 | 1  | 4  | 17 | -2  | -2  | -15 |
| -7  | -6  | -3  | 1   | 5  | -7  | -23 | -3  | 4  | 4  | 4  | -1 | 16 | -5  | 1   | -10 |
| -4  | -7  | -2  | -14 | 6  | -17 | -30 | -4  | 3  | 1  | 3  | 1  | 15 | -4  | 4   | -8  |
| -3  | -12 | 0   | -15 | 5  | -6  | -29 | -7  | 2  | -1 | 0  | -1 | 12 | -13 | -5  | -10 |
| 3   | -12 | -5  | -11 | 13 | -16 | -17 | -12 | 4  | -2 | -1 | 7  | 17 | -8  | -13 | -13 |
| -2  | -5  | -10 | -4  | 7  | -14 | -26 | -12 | 3  | -1 | 1  | -1 | 20 | -8  | -3  | -14 |
| 1   | -3  | -14 | -20 | 11 | -12 | -24 | -16 | 5  | -3 | -1 | -1 | 15 | -8  | -6  | -5  |
| 0   | -3  | 1   | -23 | 9  | -9  | -25 | -14 | 3  | 0  | 2  | 5  | 16 | -6  | -3  | -2  |
| 2   | -6  | 0   | -27 | 6  | -7  | -29 | -7  | 2  | 2  | 3  | 5  | 19 | -6  | -4  | -8  |
| -14 | 3   | -1  | -17 | 0  | -20 | -29 | -13 | 5  | -4 | -2 | 0  | 14 | 1   | -7  | -3  |
| -7  | -4  | 6   | -18 | 8  | -15 | -20 | -11 | 4  | -2 | -1 | -1 | 14 | -8  | -8  | -8  |
| -2  | -3  | -2  | -14 | 6  | -11 | -17 | -15 | 0  | 0  | -1 | 1  | 14 | -13 | -11 | -12 |
| -13 | -3  | -1  | -7  | 7  | -14 | -21 | -12 | 10 | -4 | -3 | -4 | 16 | -12 | -9  | -9  |
| -16 | -4  | 2   | -6  | -3 | -12 | -27 | -17 | 1  | -2 | 0  | 0  | 15 | -14 | -7  | -11 |

- HAL5
- PRM4
- ARO80
- YPL073C
- SAC1
- YGL250W
- YLR326W
- LYS4
- TRK1
- STP1
- YLR236C
- APL5
- SYS1
- RRP1
- YJL211C
- TNA1
- YGR259C
- DRE2
- BET4
- RCR1
- MET3
- GIM4
- YGR017W
- GUK1
- YCR061W\_1
- VPS9
- DBF2
- SER2
- TMA10
- PRP28
- CRF1
- RIB5
- RPL26A
- YFR020W
- BST1
- YDR442W
- VPS5
- STE7
- YDR222W
- YLR257W
- YGL218W\_1
- YPL040W
- GOS1
- BEM4
- STP22

Gene Name

- YPD\_K.SHIFT
- HLL.INTERACTION
- CSH.K.INTERACTION
- HLAG.K.INTERACTION
- YPEG.K.SHIFT
- HLEG.K.INTERACTION
- CSHEG.K.INTERACTION
- HLEG.AS.K.INTERACTION
- YPD.L.SHIFT
- HLL.INTERACTION
- CSH.L.INTERACTION
- HLAG.L.INTERACTION
- YPEG.L.SHIFT
- HLEG.L.INTERACTION
- CSHEG.L.INTERACTION
- HLEG.AS.L.INTERACTION

Type of Media

Color Key

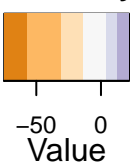

3-0.3.9-0

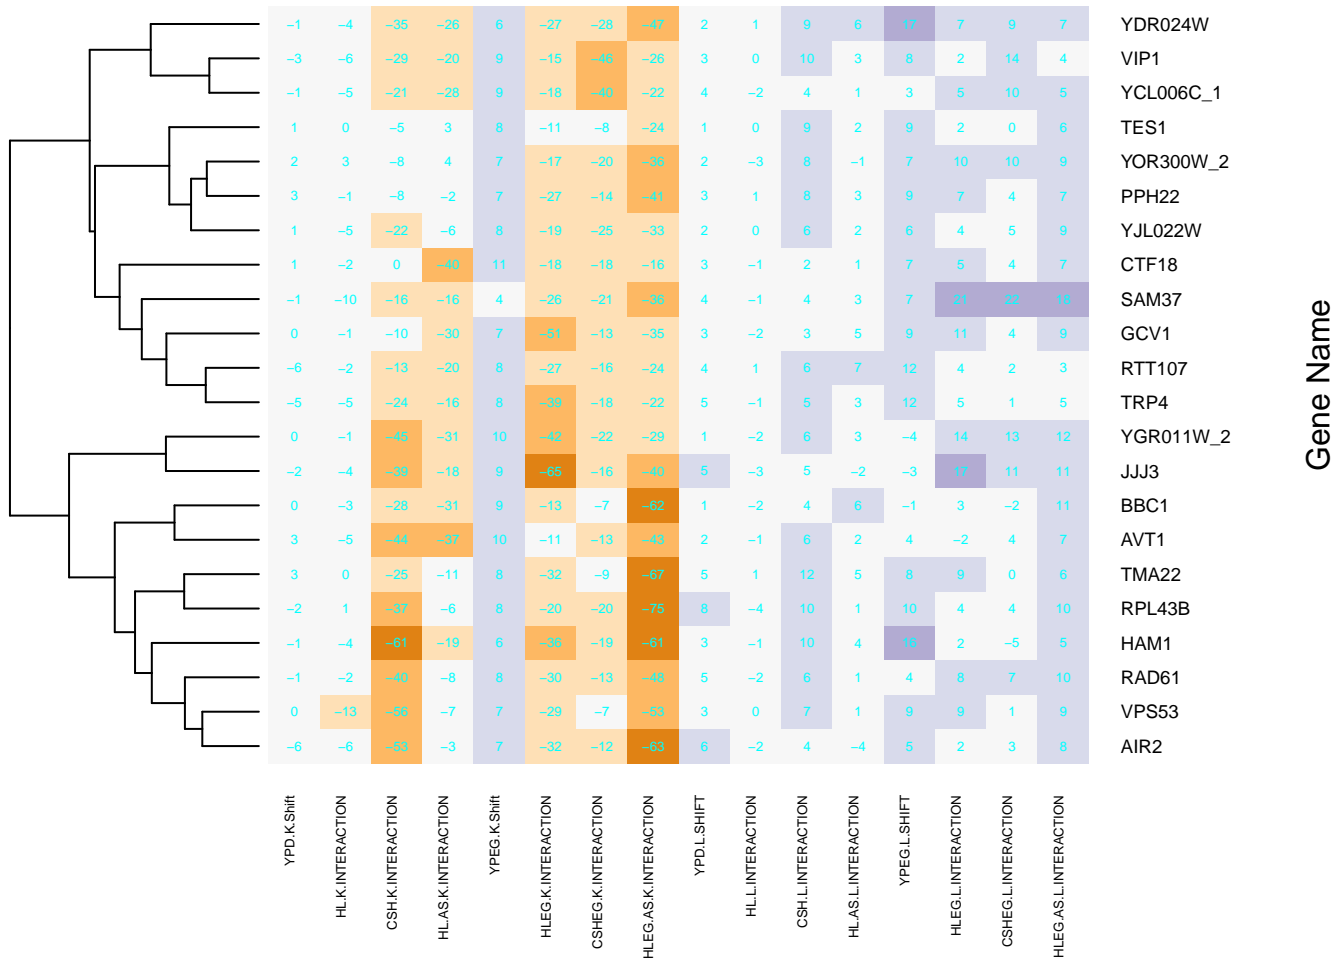

Type of Media

Color Key

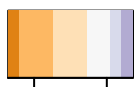

-50 0  
Value

3-0.3.9-1

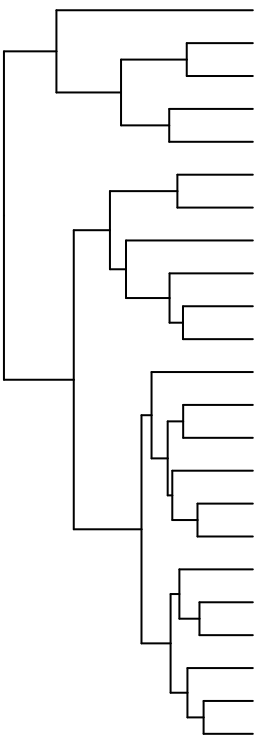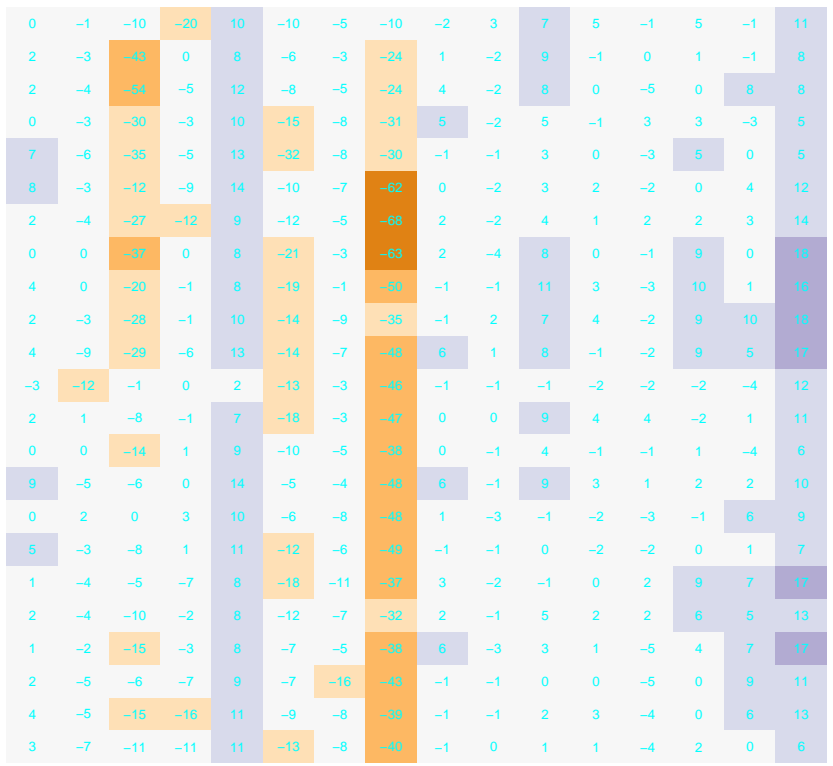

Gene Name

Type of Media

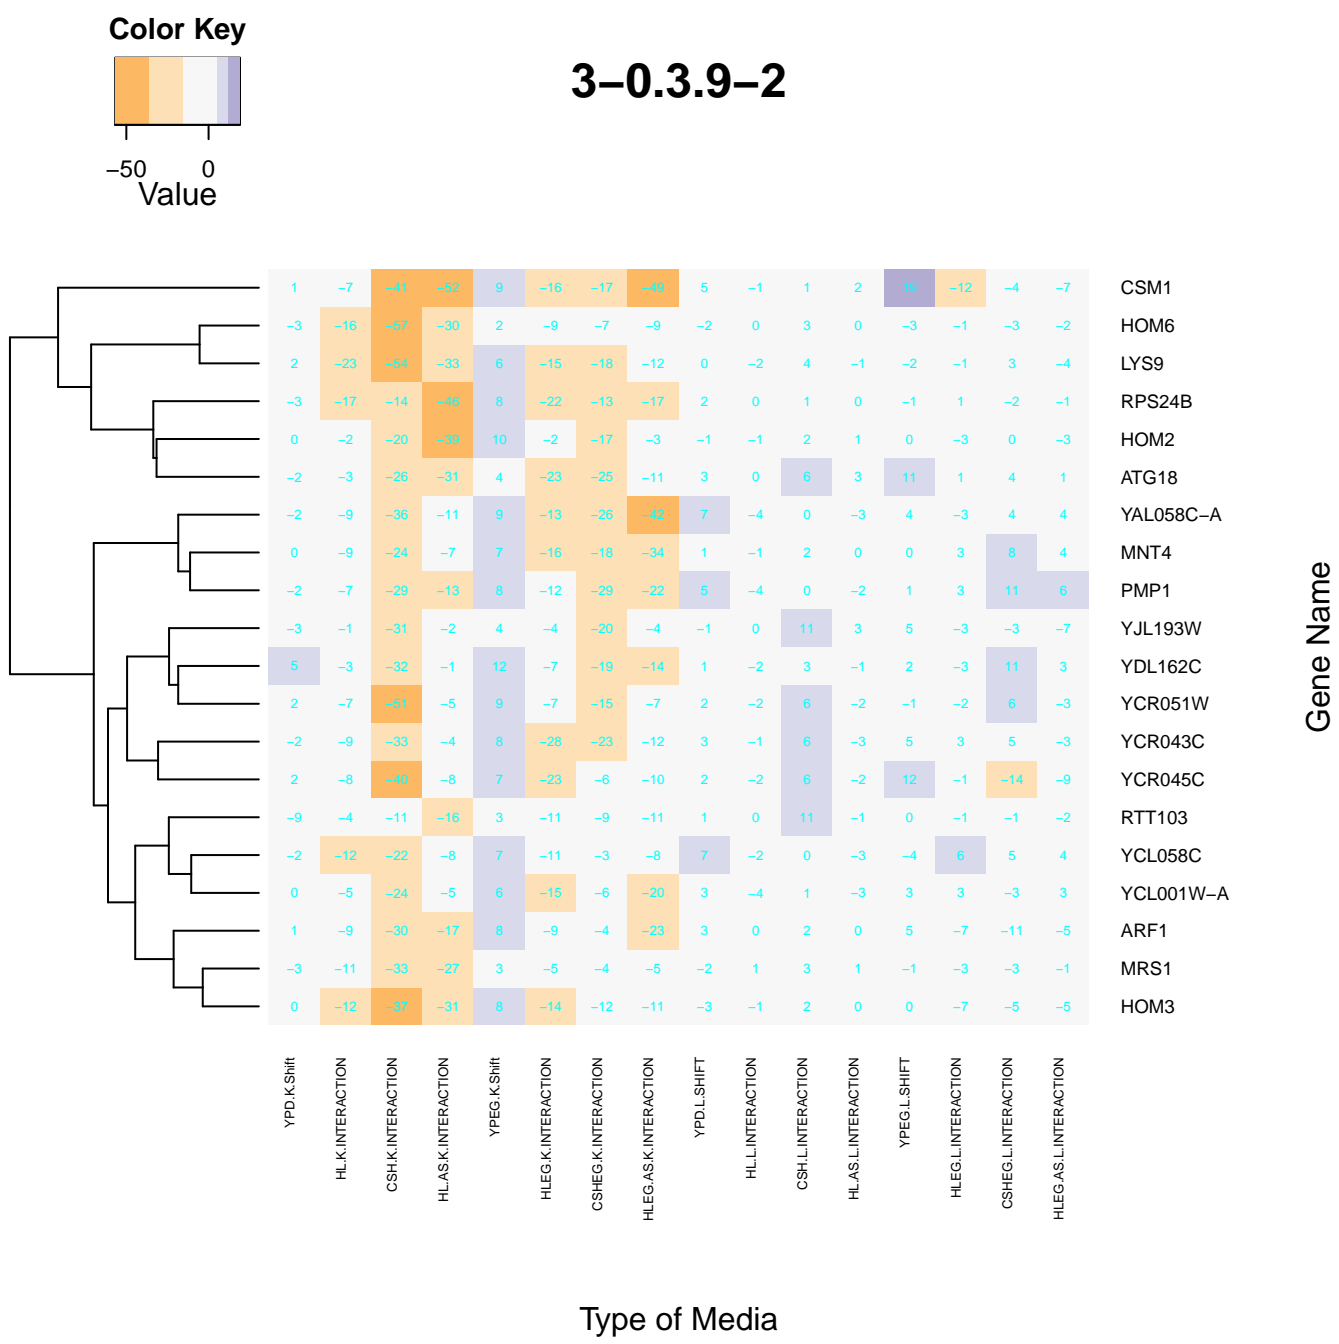

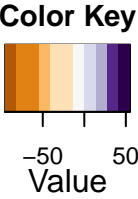

3-0.4.0-0

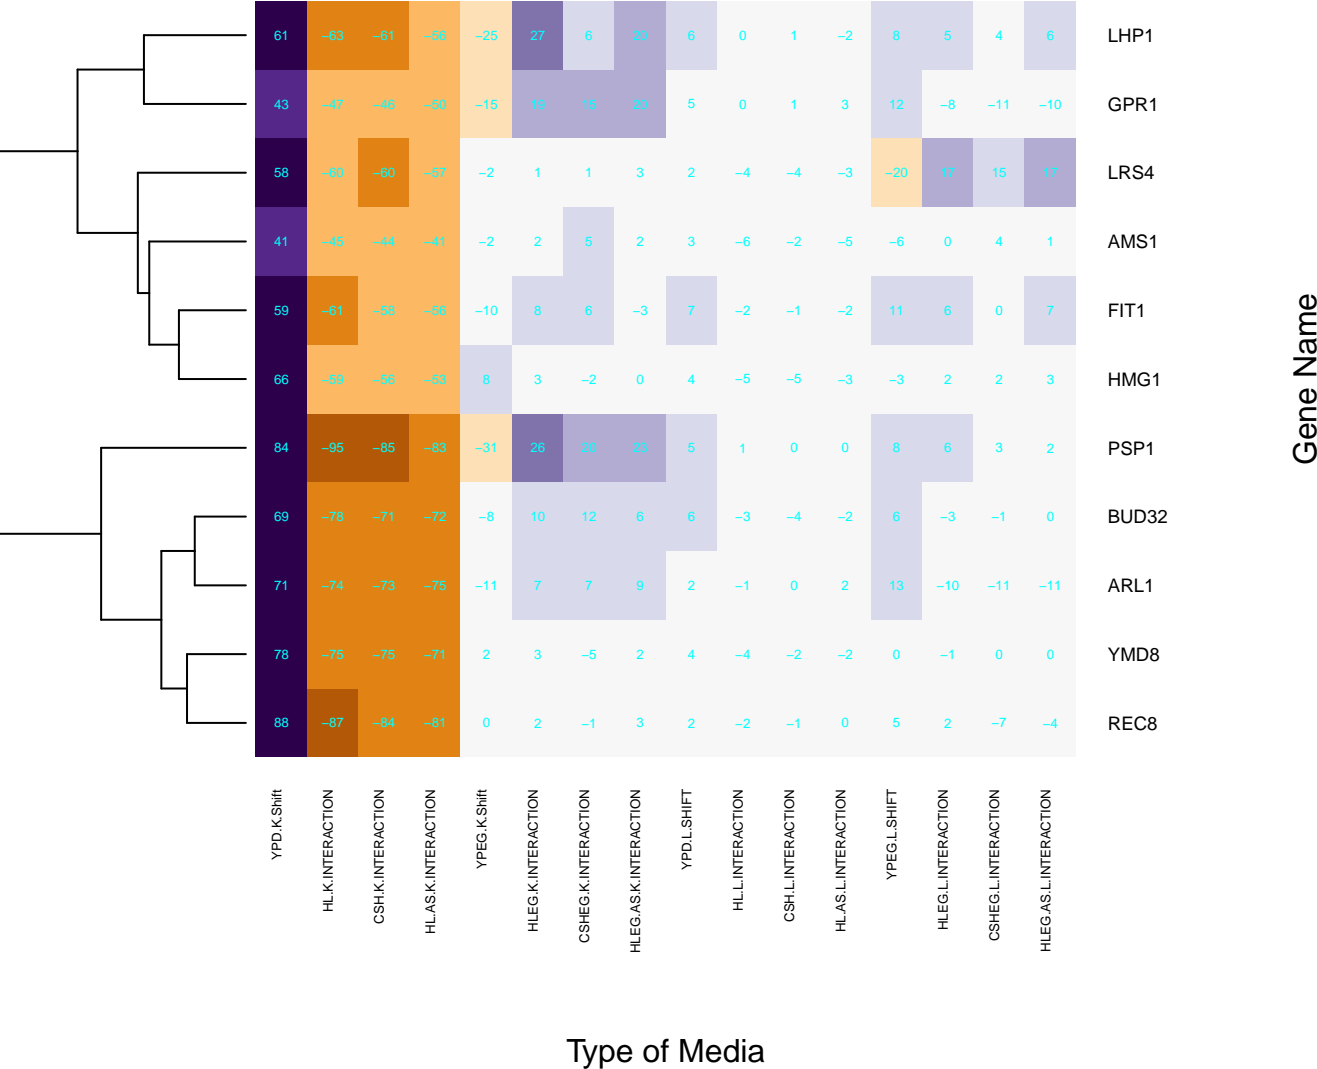

Color Key



3-0.4.0-1

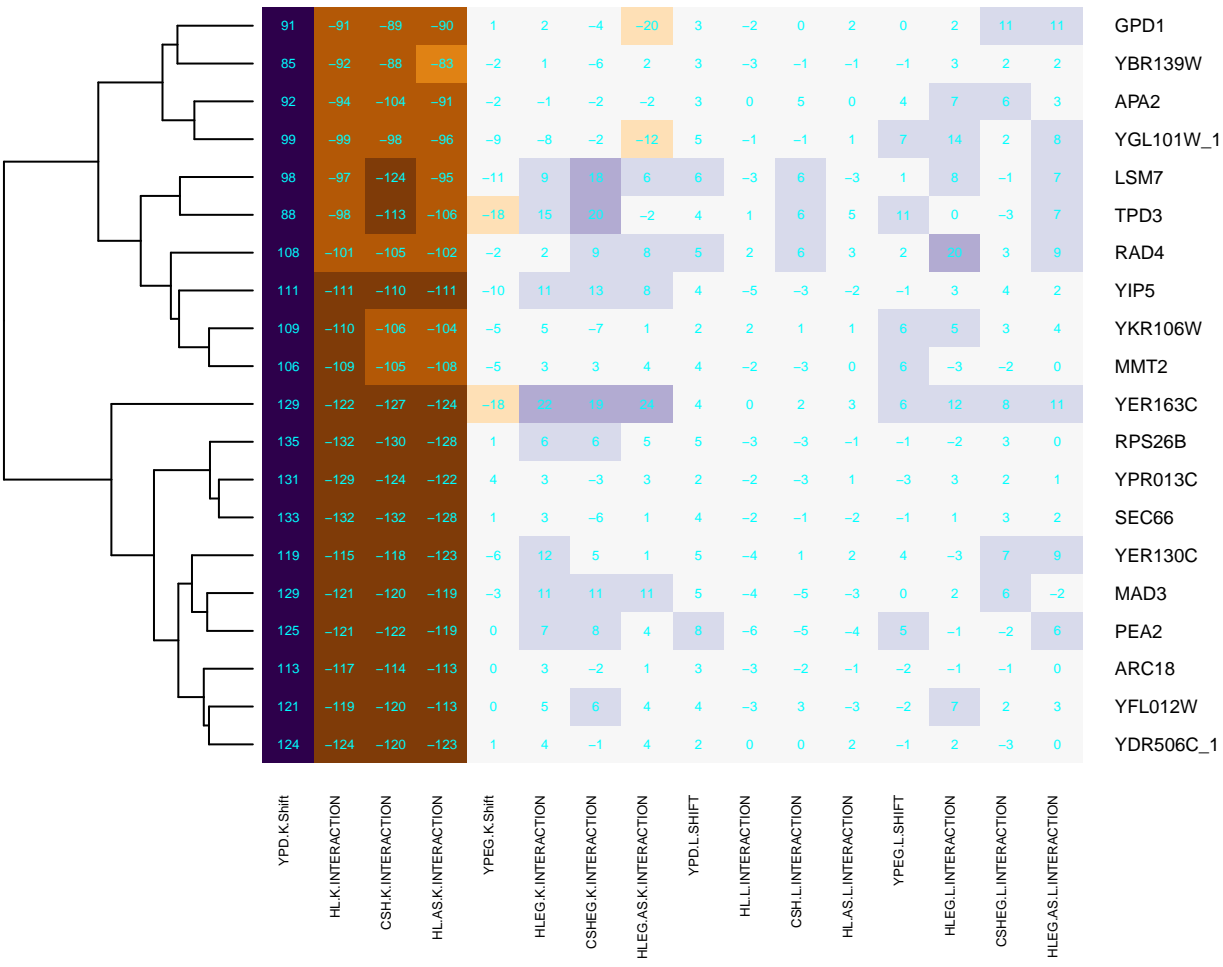

Gene Name

Type of Media

Color Key



3-0.4.4-0

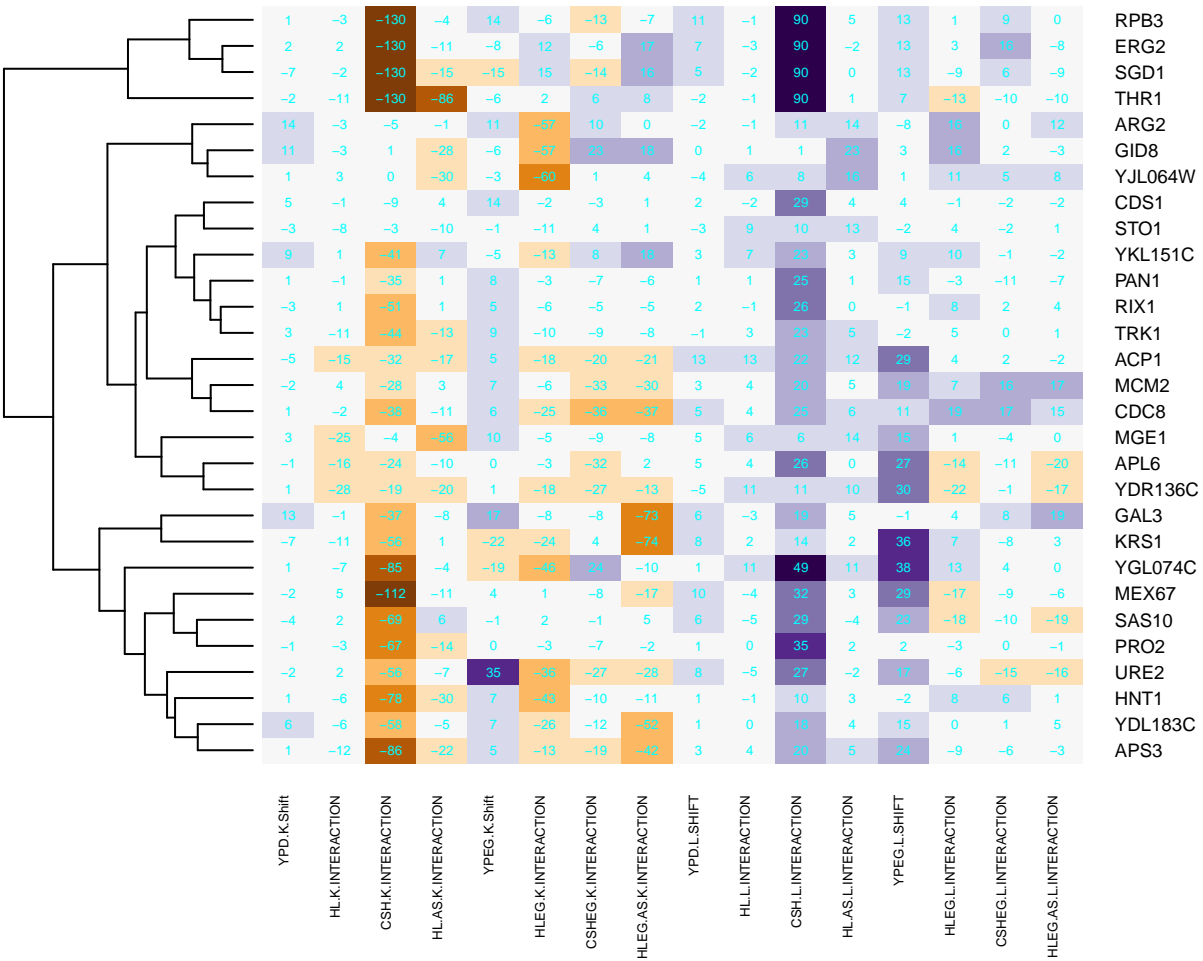

- RPB3
- ERG2
- SGD1
- THR1
- ARG2
- GID8
- YJL064W
- CDS1
- STO1
- YKL151C
- PAN1
- RIX1
- TRK1
- ACP1
- MCM2
- CDC8
- MGE1
- APL6
- YDR136C
- GAL3
- KRS1
- YGL074C
- MEX67
- SAS10
- PRO2
- URE2
- HNT1
- YDL183C
- APS3

Gene Name

Type of Media

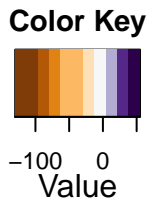

### 3-0.4.4-1

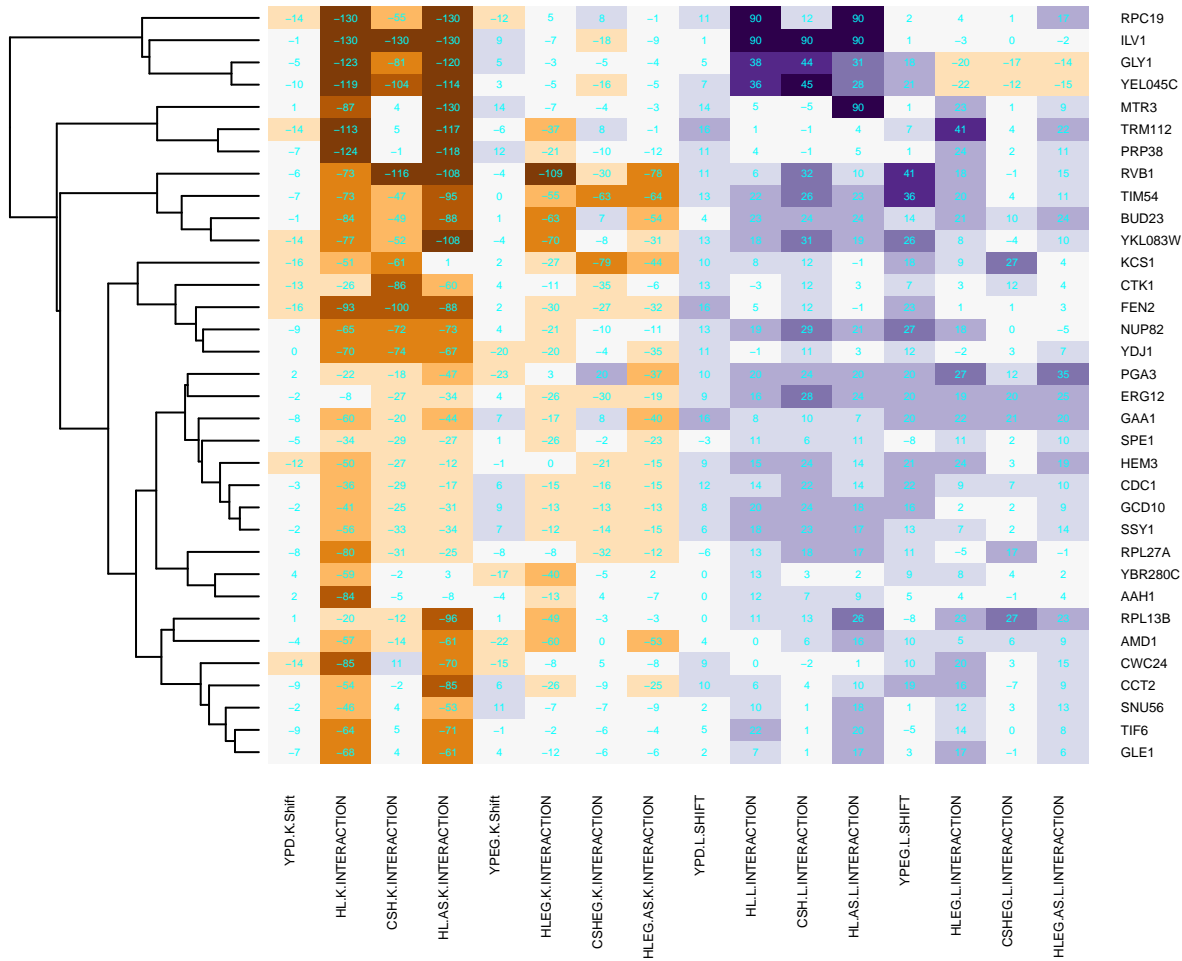

### Type of Media

Color Key

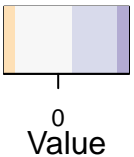

3-0.5.10-0

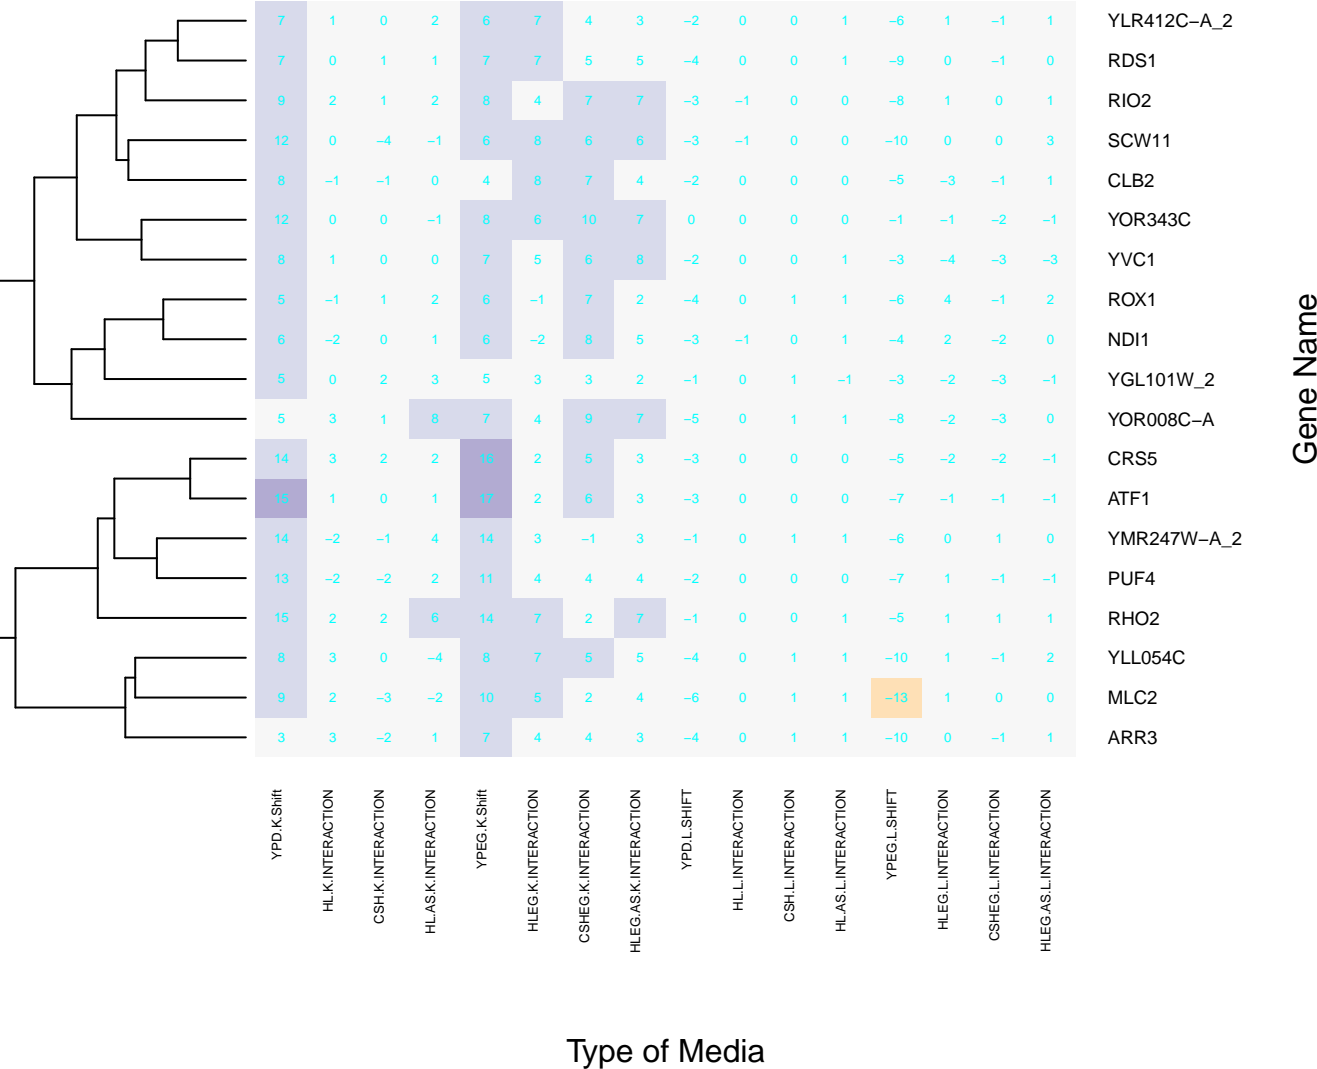

Color Key

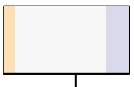

0  
Value

3-0.5.10-1

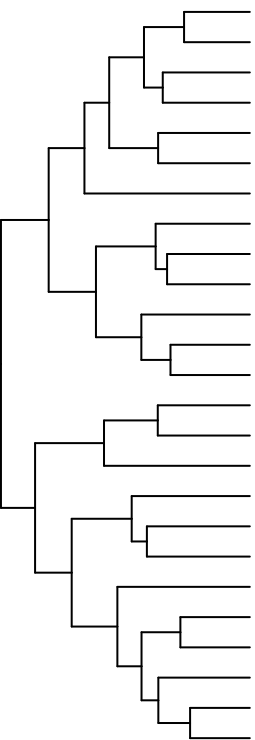

|    |    |    |     |    |   |    |    |    |    |   |    |     |    |    |    |
|----|----|----|-----|----|---|----|----|----|----|---|----|-----|----|----|----|
| 0  | 3  | 2  | -3  | 0  | 9 | 6  | 5  | -5 | 0  | 1 | 1  | -11 | 0  | -1 | 1  |
| 0  | 4  | 2  | -3  | 2  | 8 | 5  | 4  | -4 | 0  | 0 | 1  | -9  | -1 | -3 | 1  |
| -2 | 2  | 1  | -3  | 0  | 8 | 3  | 5  | -2 | 0  | 1 | 0  | -10 | -1 | 2  | 1  |
| -1 | 1  | 1  | -1  | 1  | 6 | 3  | 2  | -4 | -1 | 1 | 0  | -10 | 0  | 1  | 1  |
| 0  | 0  | 1  | -6  | 1  | 7 | 5  | 3  | -4 | 0  | 0 | 2  | -10 | -1 | 1  | 5  |
| -1 | 1  | 1  | -8  | 0  | 6 | 5  | 2  | -3 | 0  | 1 | 0  | -8  | -1 | -1 | 4  |
| -1 | -2 | 1  | -4  | -1 | 7 | -1 | 3  | -4 | 1  | 2 | 1  | -6  | -3 | -1 | 0  |
| -2 | 2  | 3  | -4  | -3 | 9 | 5  | 8  | -3 | 0  | 1 | 1  | -6  | -3 | -2 | -1 |
| -1 | 2  | 1  | -7  | -2 | 8 | 7  | 7  | -3 | -1 | 0 | 0  | -9  | -1 | -1 | 0  |
| -3 | 0  | 1  | -8  | -5 | 9 | 7  | 8  | -3 | 0  | 1 | 0  | -7  | -2 | 0  | 0  |
| -7 | 1  | 2  | -4  | -5 | 8 | 8  | 5  | -2 | 0  | 1 | 1  | -6  | -1 | -1 | 2  |
| -3 | 2  | 2  | -4  | -2 | 8 | 6  | 4  | -3 | 0  | 0 | 1  | -7  | -1 | -1 | 2  |
| -5 | 1  | 3  | -6  | -2 | 6 | 5  | 0  | -3 | 1  | 1 | 0  | -7  | -1 | -1 | 1  |
| 5  | 0  | 2  | -12 | -1 | 7 | 5  | 6  | -2 | -1 | 0 | -1 | -6  | 0  | 0  | 1  |
| 6  | -1 | 0  | -8  | 1  | 8 | 3  | 6  | -2 | -2 | 1 | 0  | -6  | 0  | 0  | 0  |
| 1  | -1 | 1  | -12 | -5 | 6 | 5  | 6  | -2 | 0  | 1 | 1  | -5  | 0  | 0  | 1  |
| 0  | -1 | 0  | -10 | 0  | 6 | 2  | -3 | -2 | -1 | 1 | 0  | -6  | -1 | -1 | 0  |
| -2 | -1 | -1 | -10 | -3 | 5 | -1 | 1  | -2 | -1 | 0 | 1  | -4  | -2 | -2 | -1 |
| -3 | -4 | 2  | -10 | -1 | 4 | 0  | 1  | -3 | 0  | 0 | 0  | -8  | -1 | -3 | 0  |
| -2 | -5 | 0  | -7  | -2 | 5 | 4  | 6  | -1 | 1  | 0 | 1  | -7  | -2 | -1 | 0  |
| -4 | -2 | 1  | -7  | -4 | 8 | 5  | 3  | -3 | 0  | 0 | 0  | -7  | -2 | -2 | -1 |
| -3 | -1 | 2  | -9  | -3 | 5 | 2  | 3  | -3 | 0  | 0 | -1 | -7  | -2 | -3 | -1 |
| -2 | -3 | -1 | -12 | -3 | 7 | 3  | 3  | -3 | -1 | 1 | 0  | -6  | -1 | -1 | 1  |
| -3 | -1 | 2  | -10 | -4 | 8 | 4  | 3  | -3 | 0  | 1 | 1  | -6  | -2 | 0  | 2  |
| -5 | -2 | 0  | -10 | -5 | 7 | 4  | 2  | -2 | 0  | 1 | 1  | -5  | -1 | 0  | 3  |

GPB2  
YLL053C  
CNE1  
GLO2  
FRE6  
RNP1  
YAL061W  
YAL037W  
YLL047W  
SIP5  
YLR004C  
BDH1  
YLR125W\_1  
ATG16  
SPA2  
SML1  
ATG10  
YMR041C  
MIH1  
FPS1  
YPS1  
YLL055W  
YLR122C  
JLP1  
YML082W

Gene Name

YPD.K.Shift  
HLK.INTERACTION  
CSH.K.INTERACTION  
HLAS.K.INTERACTION  
YPEG.K.Shift  
HLEG.K.INTERACTION  
CSHEG.K.INTERACTION  
HLEG.AS.K.INTERACTION  
YPD.L.Shift  
HLL.INTERACTION  
CSH.L.INTERACTION  
HLAS.L.INTERACTION  
YPEG.L.Shift  
HLEG.L.INTERACTION  
CSHEG.L.INTERACTION  
HLEG.AS.L.INTERACTION

Type of Media

Color Key

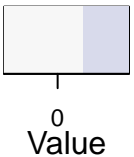

3-0.5.10-2

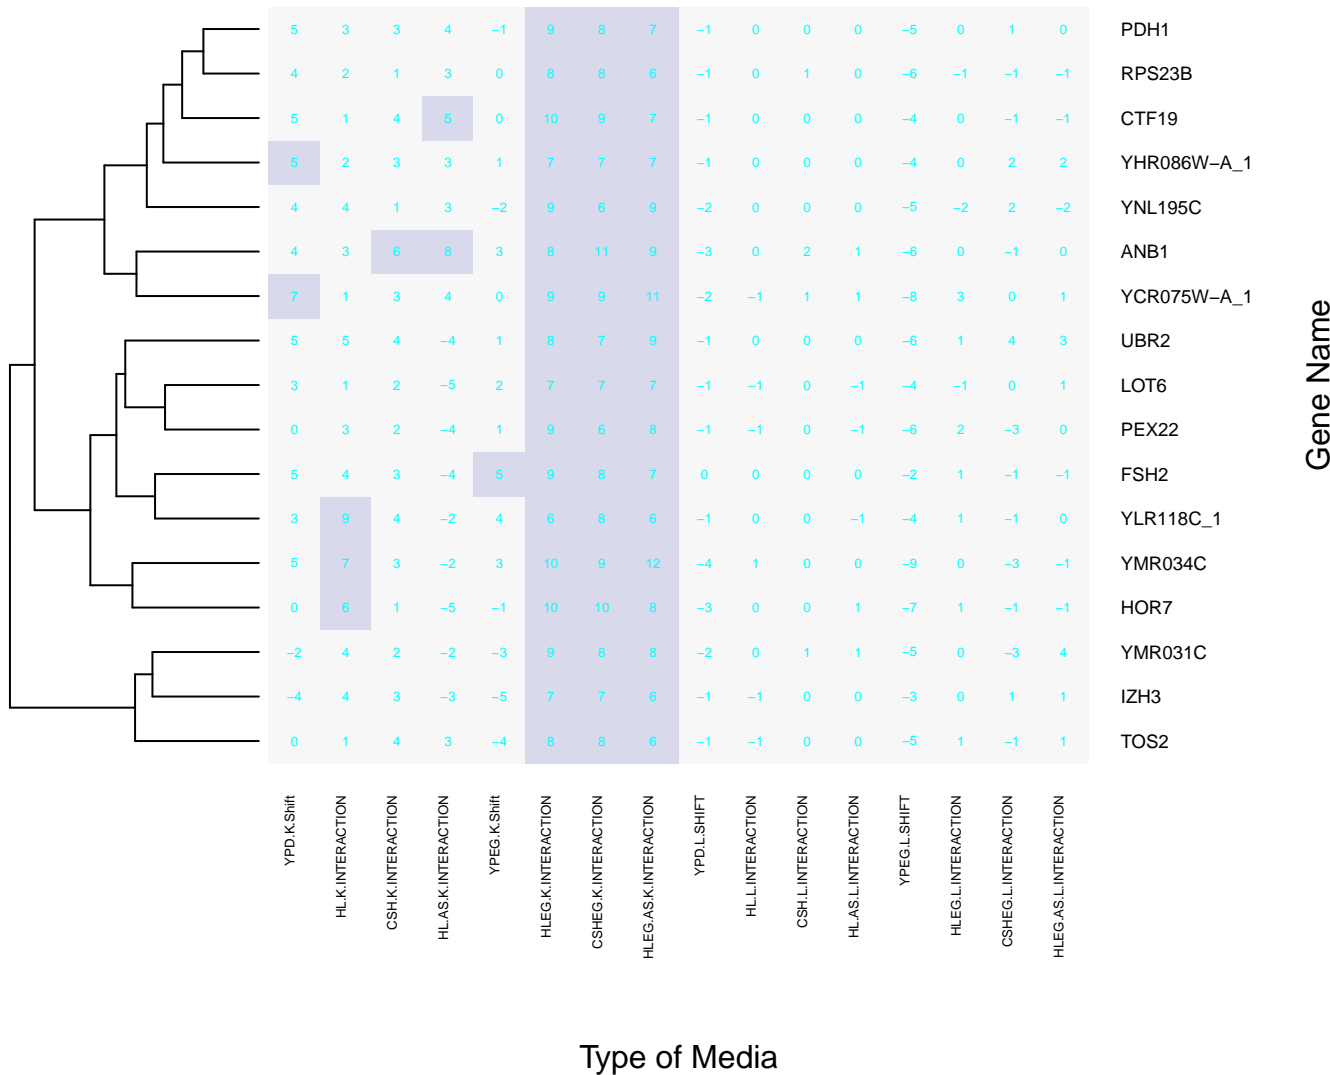

Color Key

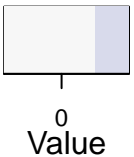

3-0.5.10-3

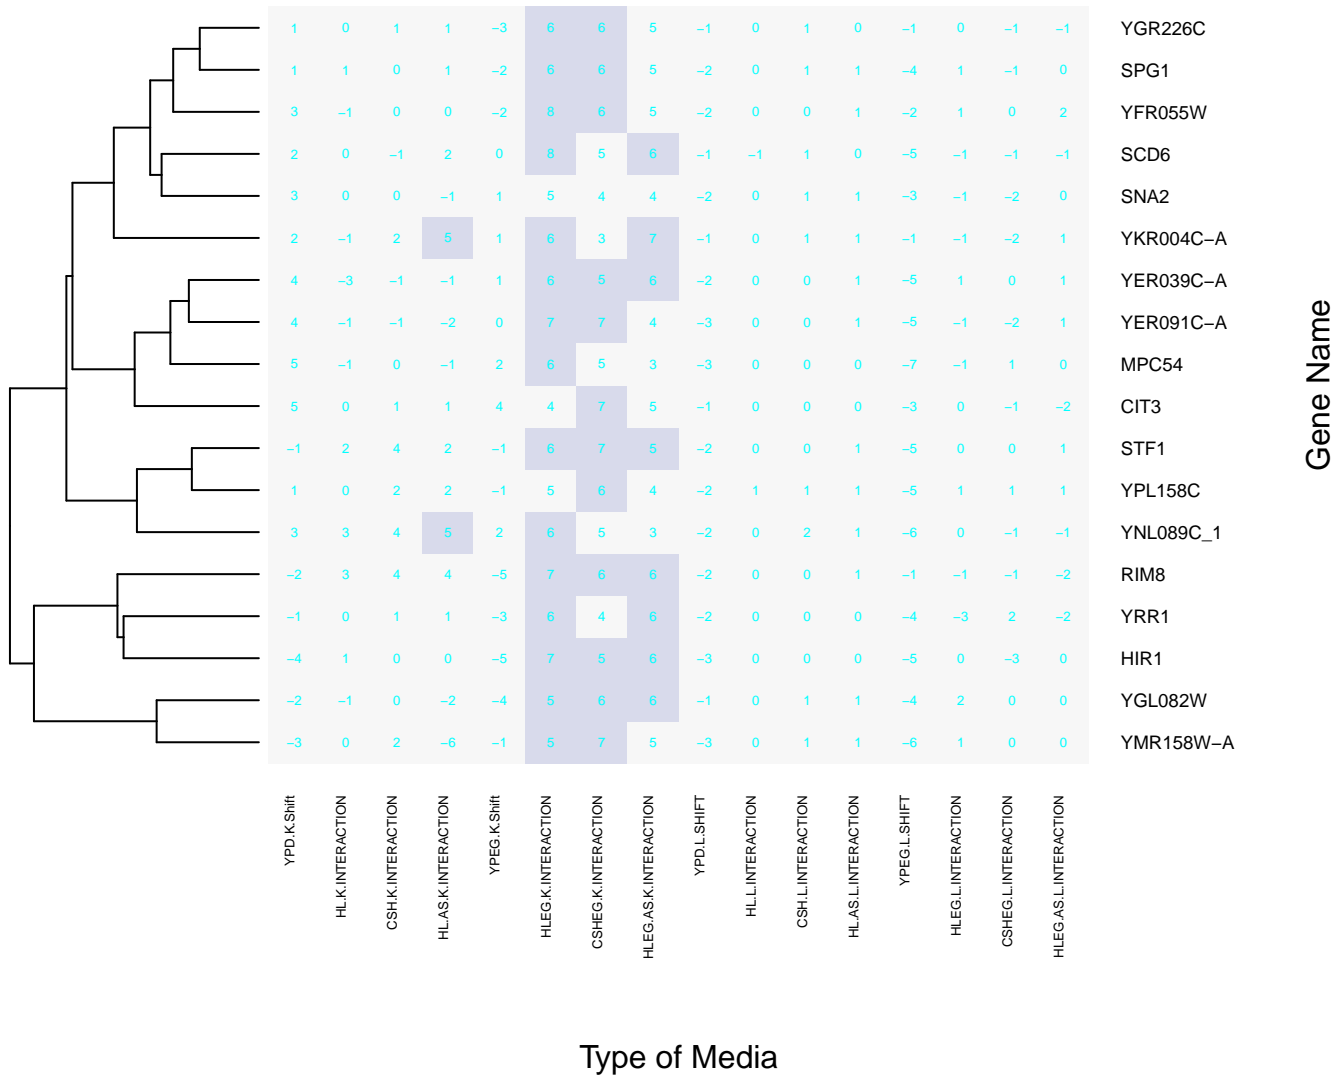

Color Key

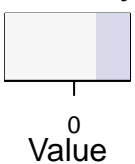

3-0.5.10-4

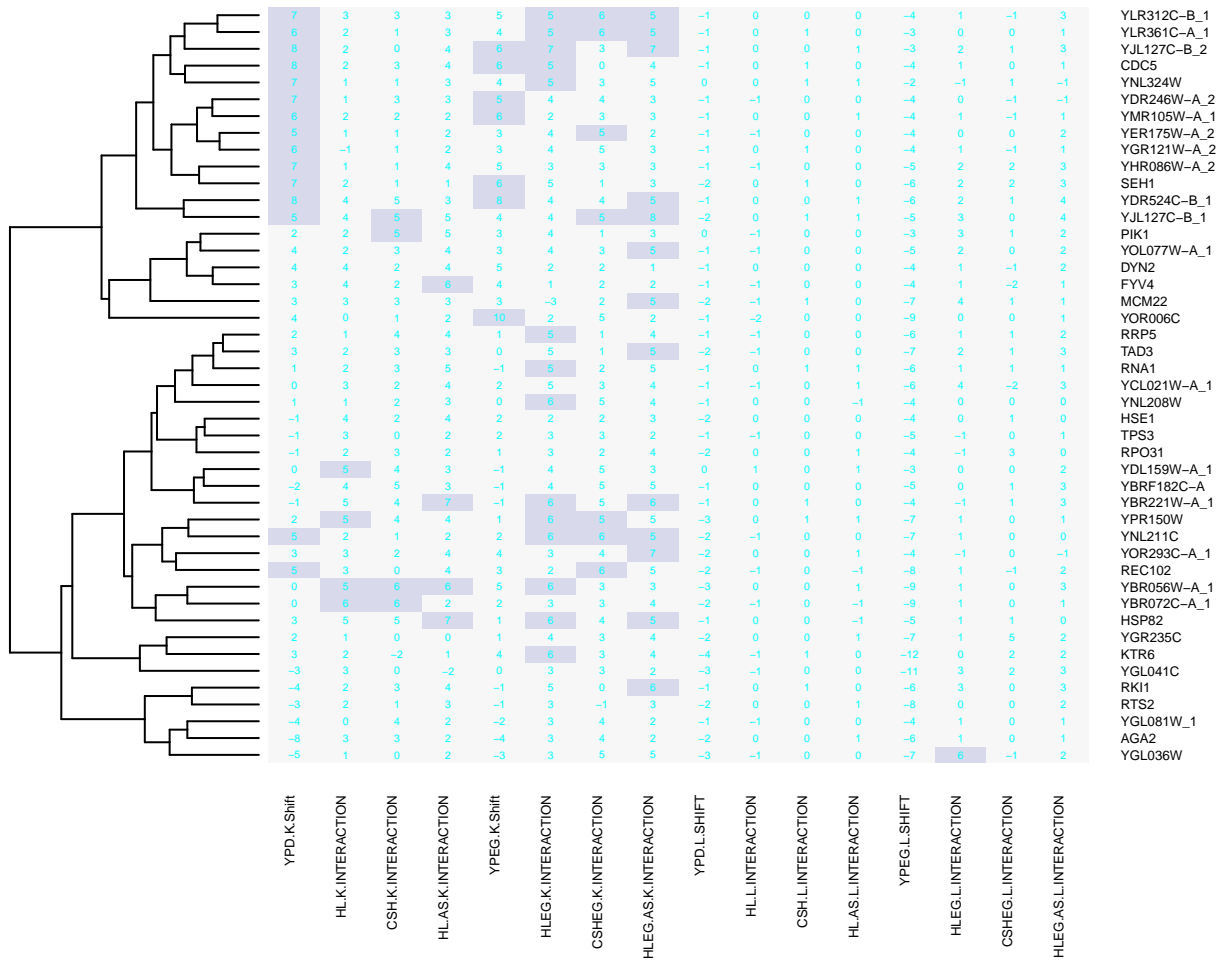

Gene Name

Type of Media

Color Key

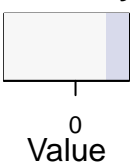

3-0.5.10-5

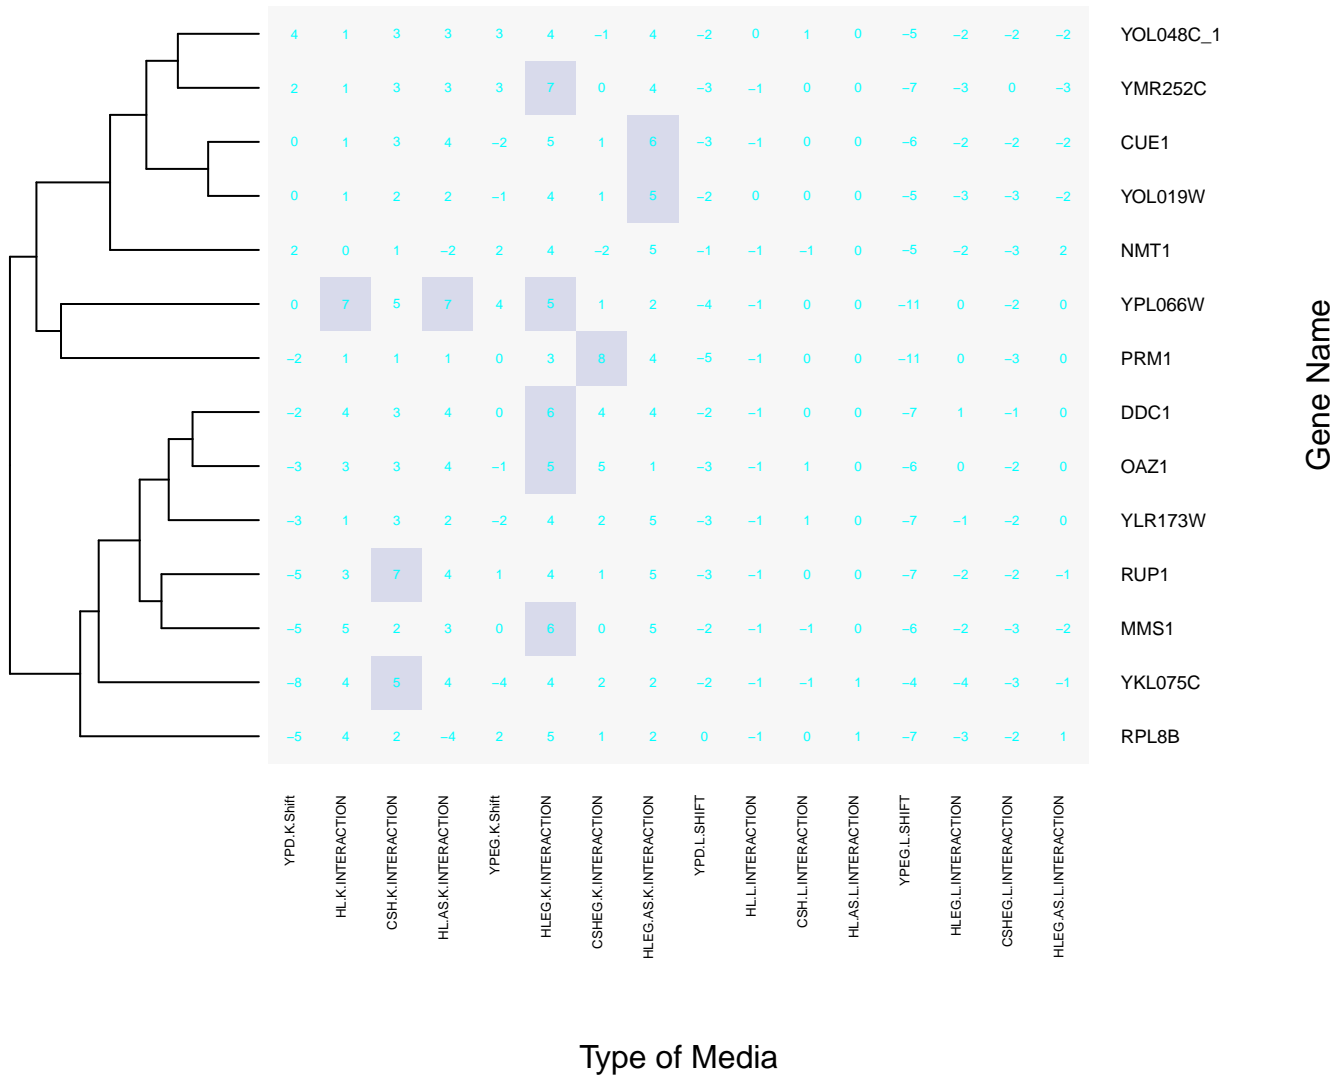

Color Key

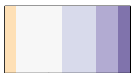

0  
Value

3-0.5.13-0

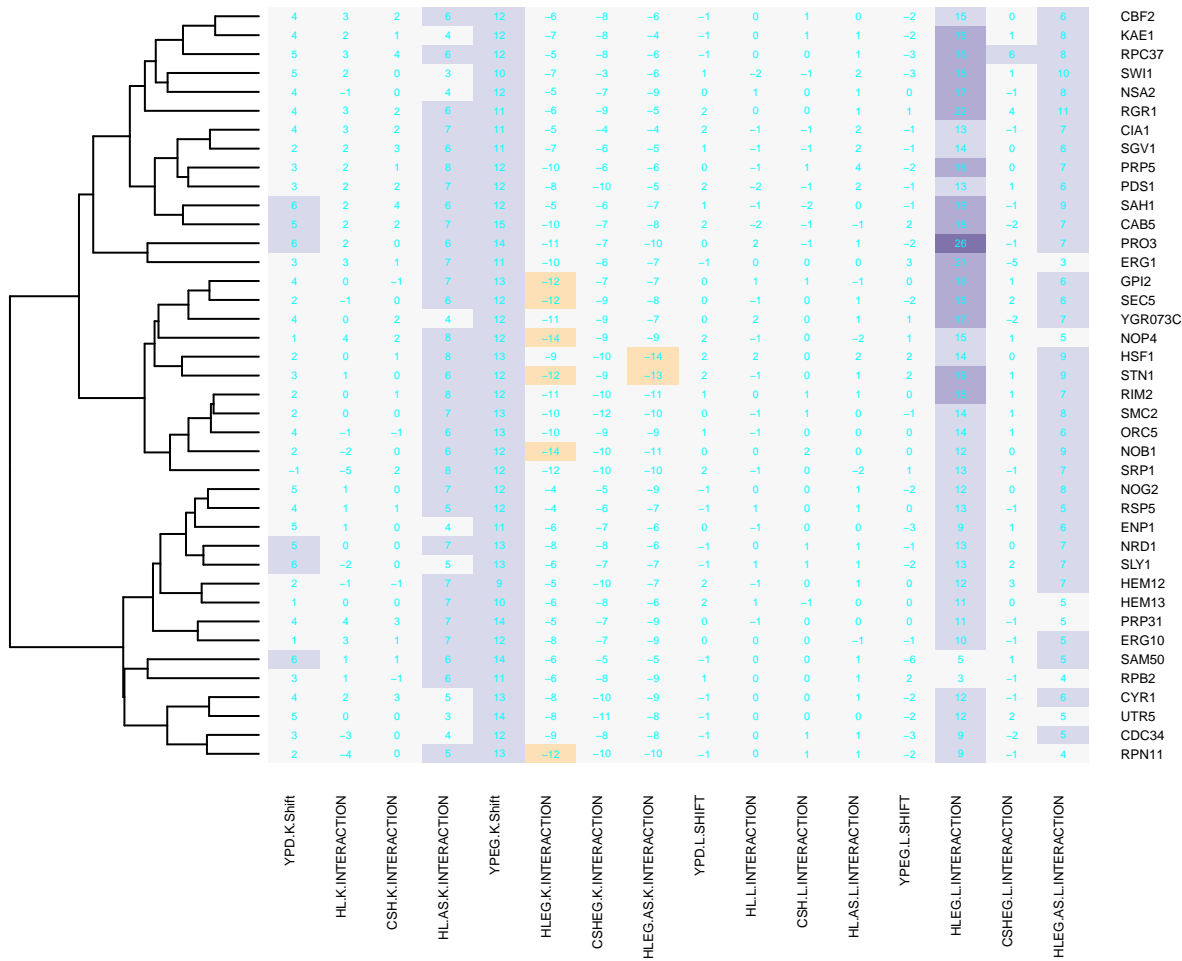

Gene Name

Type of Media

Color Key

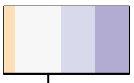

0  
Value

3-0.5.13-1

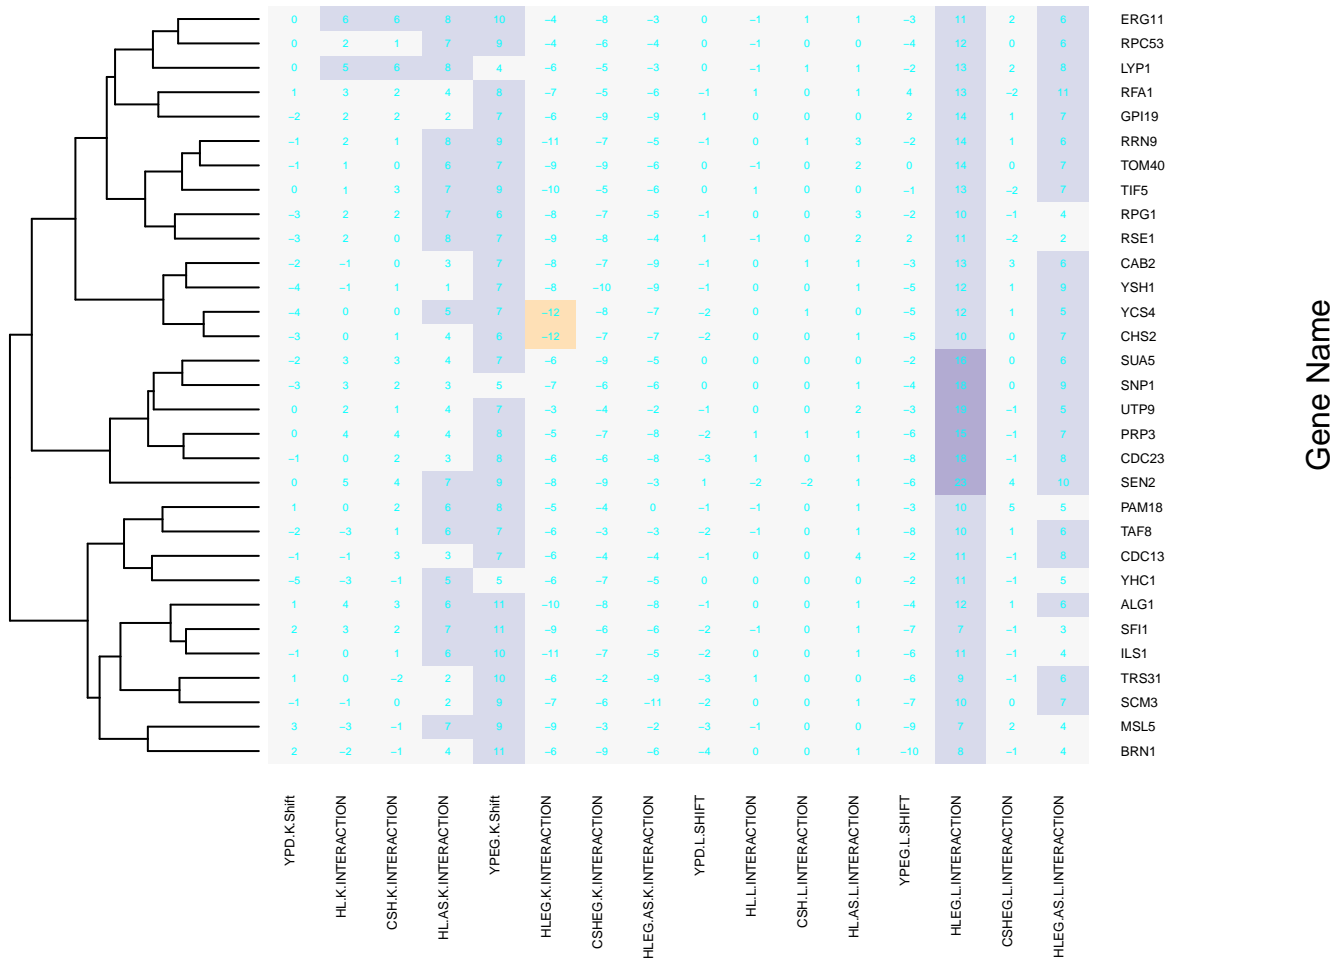

Color Key

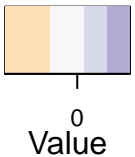

3-0.5.14-0

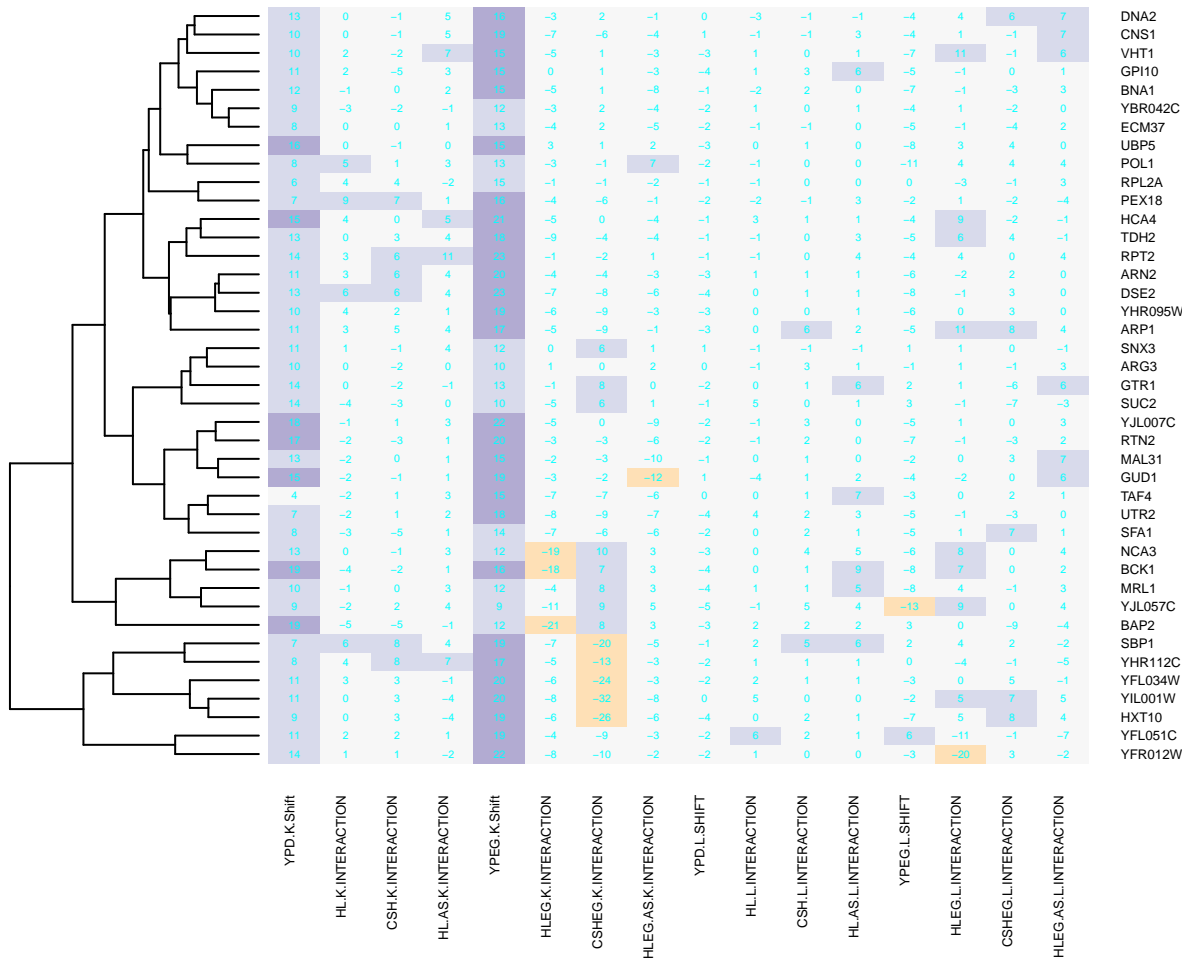

Color Key

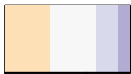

0  
Value

3-0.5.14-1

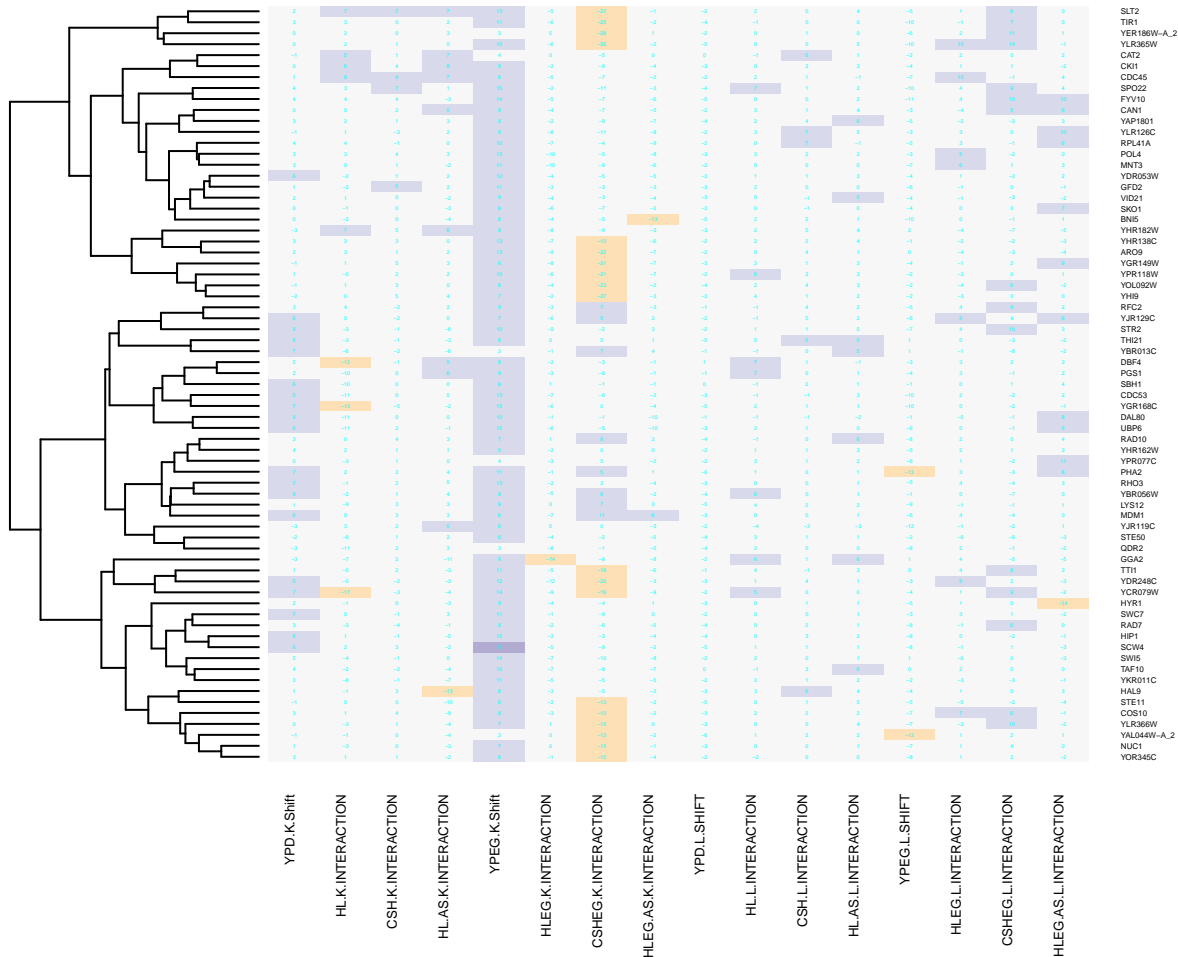

Type of Media

Color Key

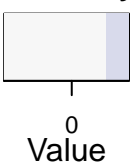

3-0.5.16-0

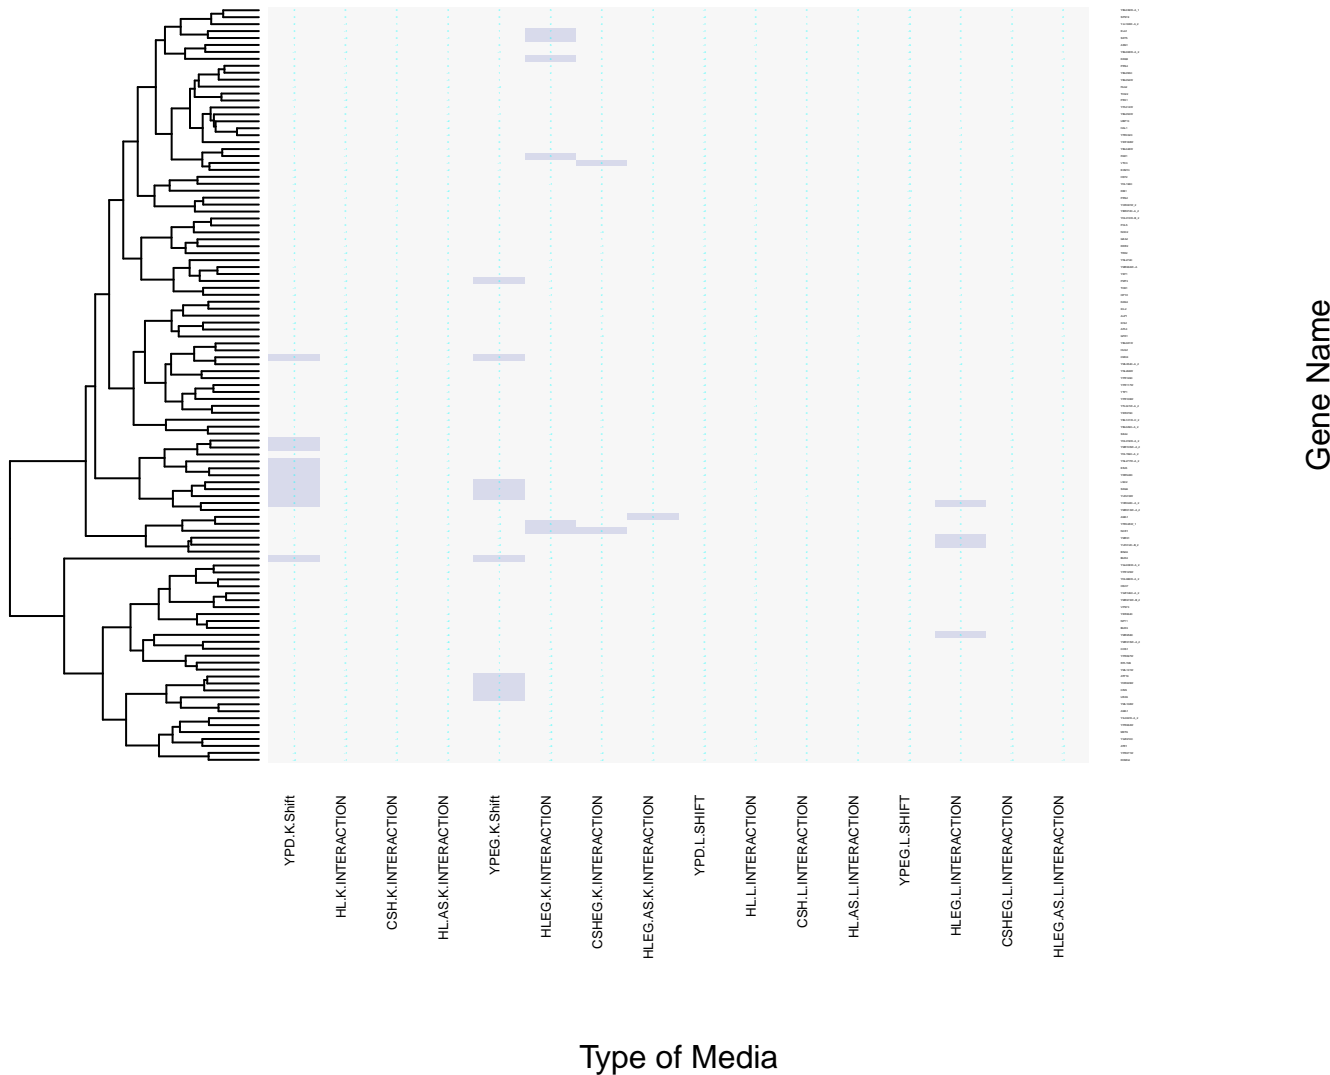

Color Key

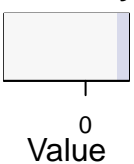

3-0.5.16-1

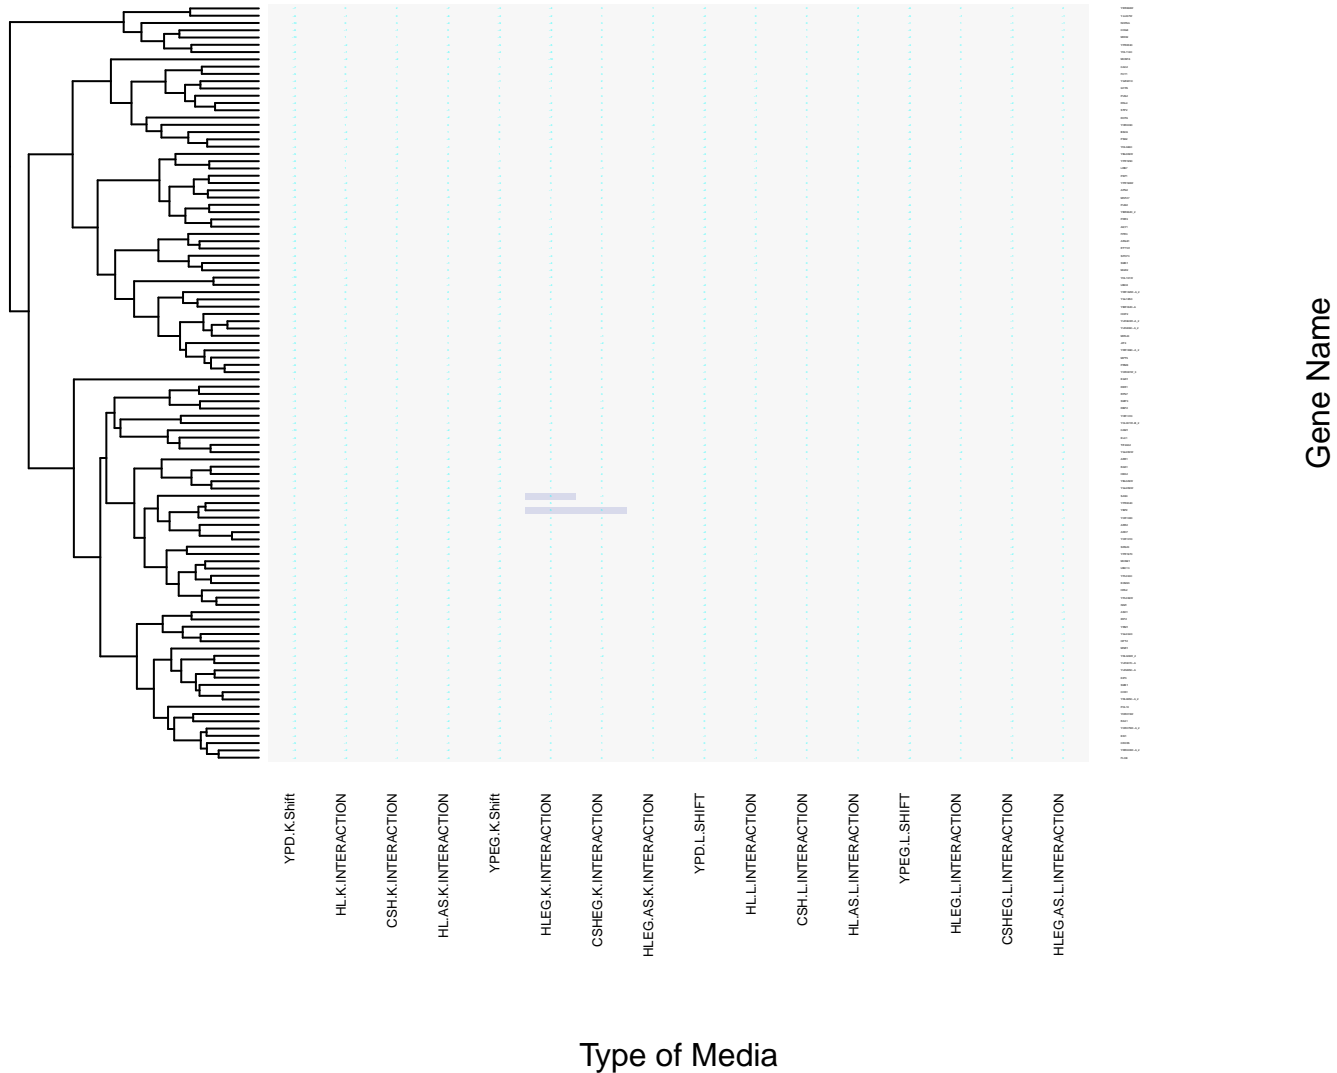

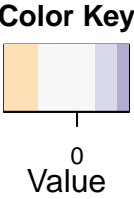

3-0.5.17-0

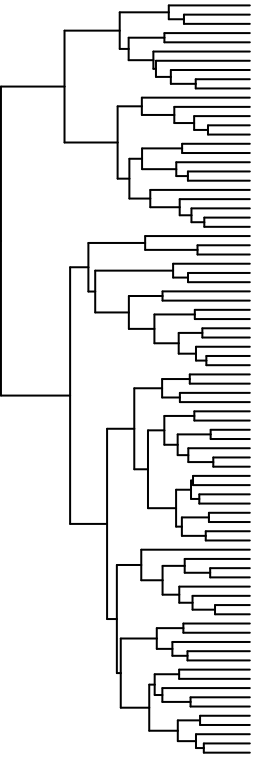

YPD\_K.SHIFT

HLL\_K.INTERACTION

CSH\_K.K.INTERACTION

HLAS\_K.INTERACTION

YPEG\_K.SHIFT

HLEG\_K.INTERACTION

CSHEG\_K.INTERACTION

HLEG\_ASK.INTERACTION

YPD\_L.SHIFT

HLL.INTERACTION

CSH\_L.INTERACTION

HLAS\_L.INTERACTION

YPEG\_L.SHIFT

HLEG\_L.INTERACTION

CSHEG\_L.INTERACTION

HLEG\_AS\_L.INTERACTION

BZZ1  
CPS1  
YBR017C  
YBR040C  
TRG2  
TCO1  
SPO12  
ABN1  
YIL044W  
YLF2  
CTB  
SNK4  
YIL040W  
YOR040C  
YGR020W  
YPS1  
KEB1  
SBH1  
YBR040W  
GPS2  
YOR133C  
ANI1  
YGR127W  
GPS  
YGR020W  
AOK  
TEL03C  
SNN  
YBR020C  
EDC1  
SLX1  
YOL117C  
YPL156W  
FBI1  
YBR131C  
FBI1  
YK4  
HGR1  
RPS  
HPC2  
GCM4  
YOR132C  
EDC1  
NAB1  
TRE1  
STY15  
YGR020W  
YGR027C  
MR2  
YKJ14C  
PXA1  
DCC1  
SPC1  
HRE1  
PIC2  
RPS  
CADI  
HRE1  
YBR078W  
YGR020W  
SOS1  
YBR017C  
HRE1  
OYE3  
HTE  
VAB2  
YOR107C  
SBI  
KPS  
TAK4  
YBR020C  
RPS  
LCB2  
YBR020W  
GPS  
YOL030C.1  
RPI1  
ECM34  
YIL040W  
YIL040C  
YPS1  
YBR131C

Gene Name

Type of Media

Color Key

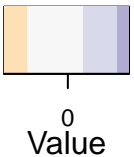

3-0.5.17-1

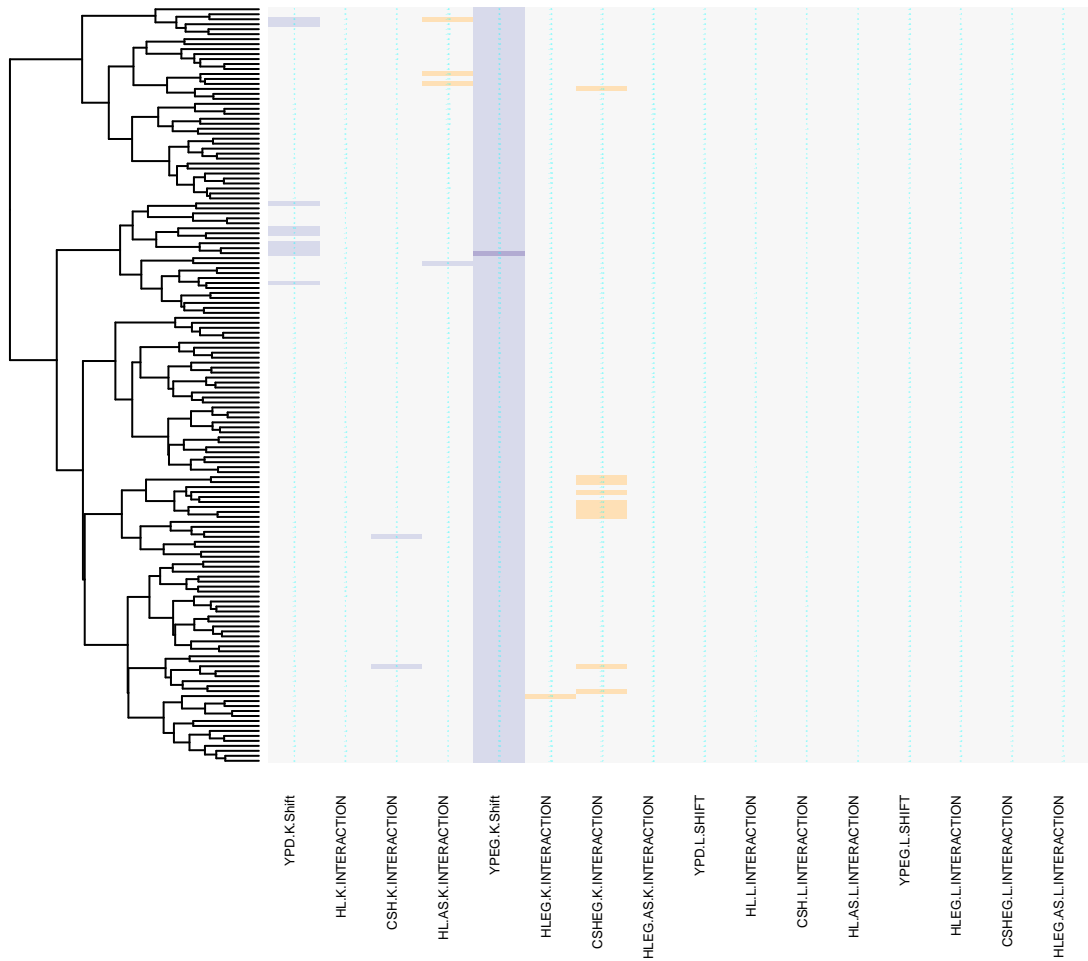

Gene Name

- CBH1
- CBH2
- CBH3
- CBH4
- CBH5
- CBH6
- CBH7
- CBH8
- CBH9
- CBH10
- CBH11
- CBH12
- CBH13
- CBH14
- CBH15
- CBH16
- CBH17
- CBH18
- CBH19
- CBH20
- CBH21
- CBH22
- CBH23
- CBH24
- CBH25
- CBH26
- CBH27
- CBH28
- CBH29
- CBH30
- CBH31
- CBH32
- CBH33
- CBH34
- CBH35
- CBH36
- CBH37
- CBH38
- CBH39
- CBH40
- CBH41
- CBH42
- CBH43
- CBH44
- CBH45
- CBH46
- CBH47
- CBH48
- CBH49
- CBH50
- CBH51
- CBH52
- CBH53
- CBH54
- CBH55
- CBH56
- CBH57
- CBH58
- CBH59
- CBH60
- CBH61
- CBH62
- CBH63
- CBH64
- CBH65
- CBH66
- CBH67
- CBH68
- CBH69
- CBH70
- CBH71
- CBH72
- CBH73
- CBH74
- CBH75
- CBH76
- CBH77
- CBH78
- CBH79
- CBH80
- CBH81
- CBH82
- CBH83
- CBH84
- CBH85
- CBH86
- CBH87
- CBH88
- CBH89
- CBH90
- CBH91
- CBH92
- CBH93
- CBH94
- CBH95
- CBH96
- CBH97
- CBH98
- CBH99
- CBH100

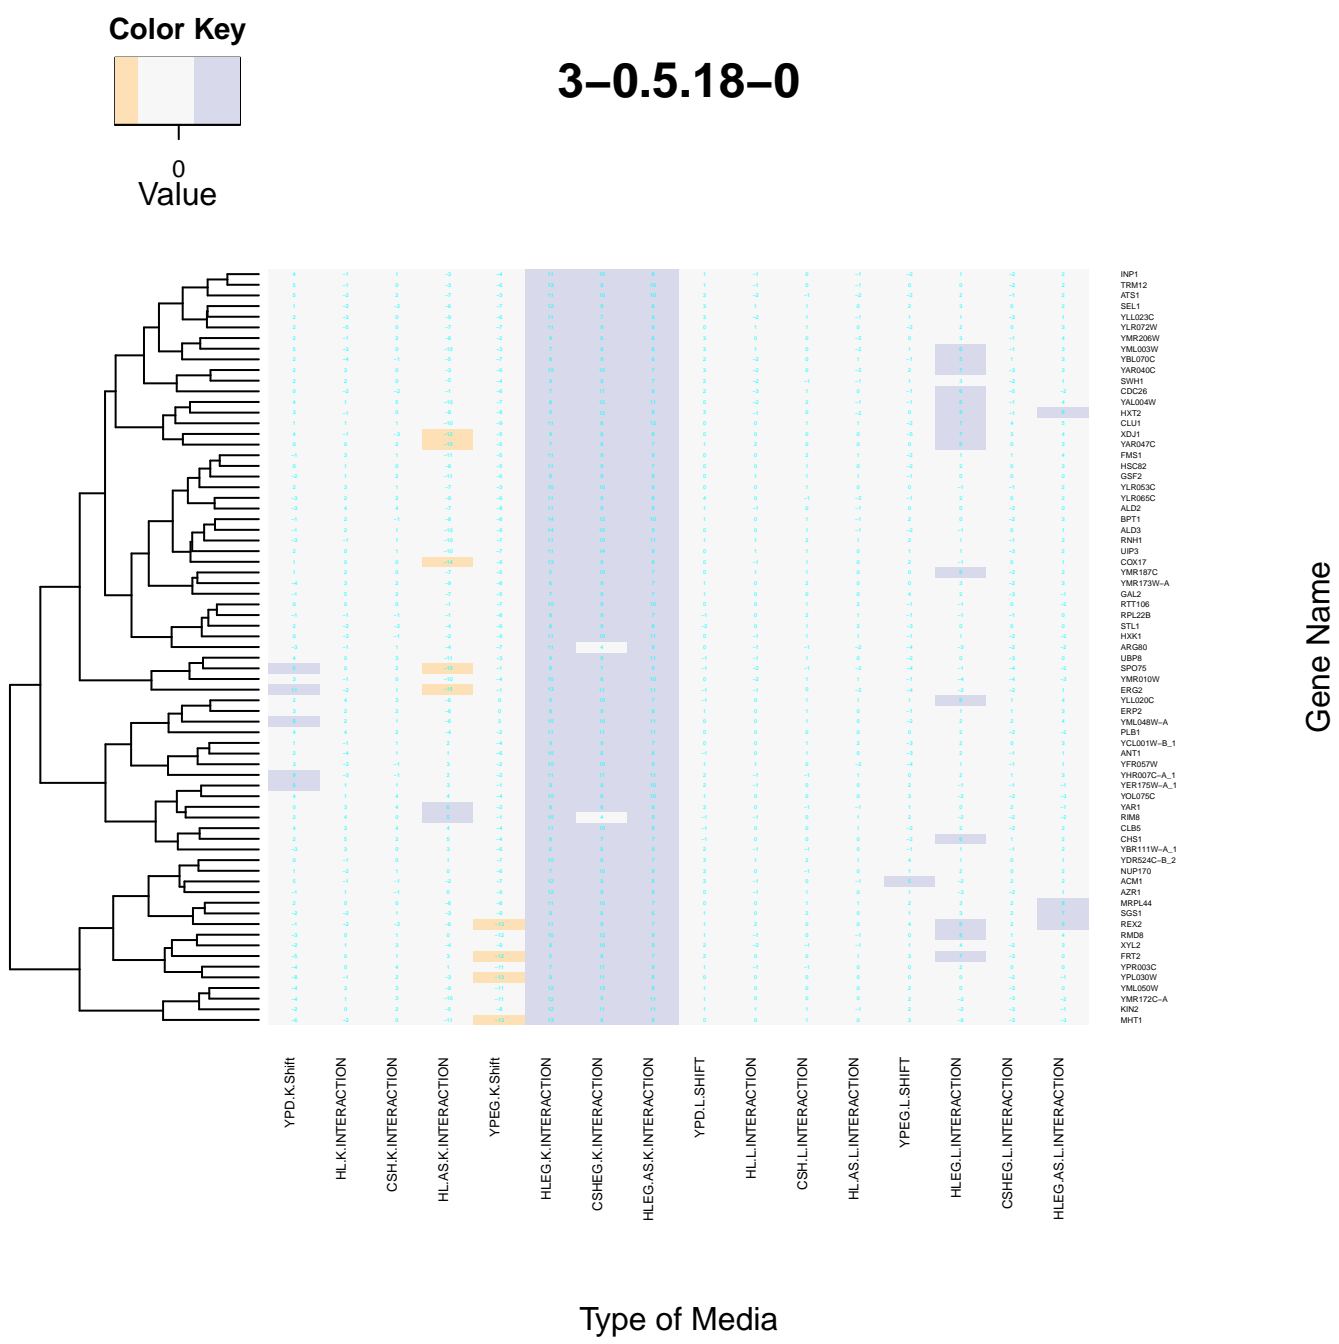

Color Key

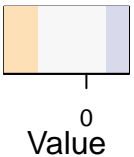

3-0.5.18-1

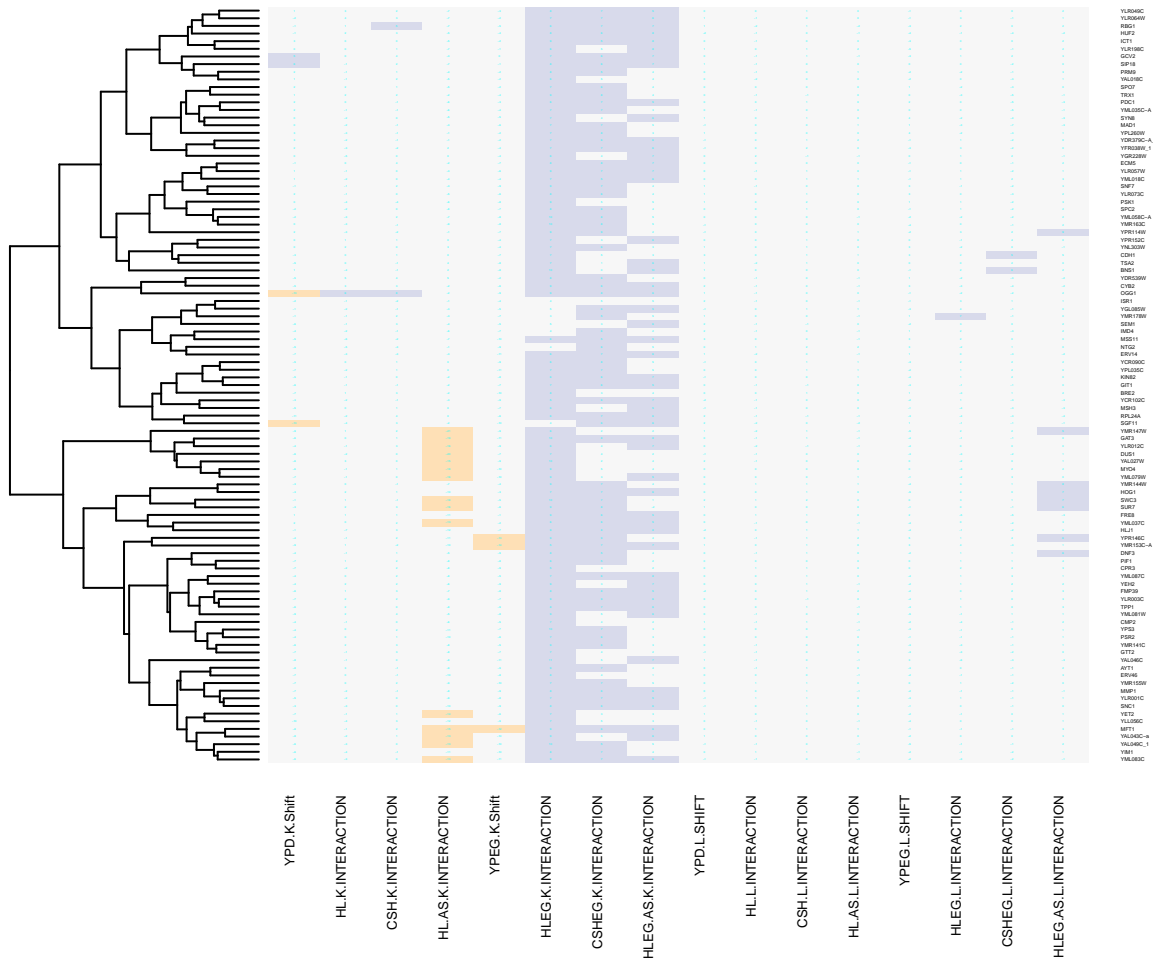

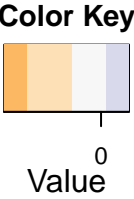

3-0.5.19-0

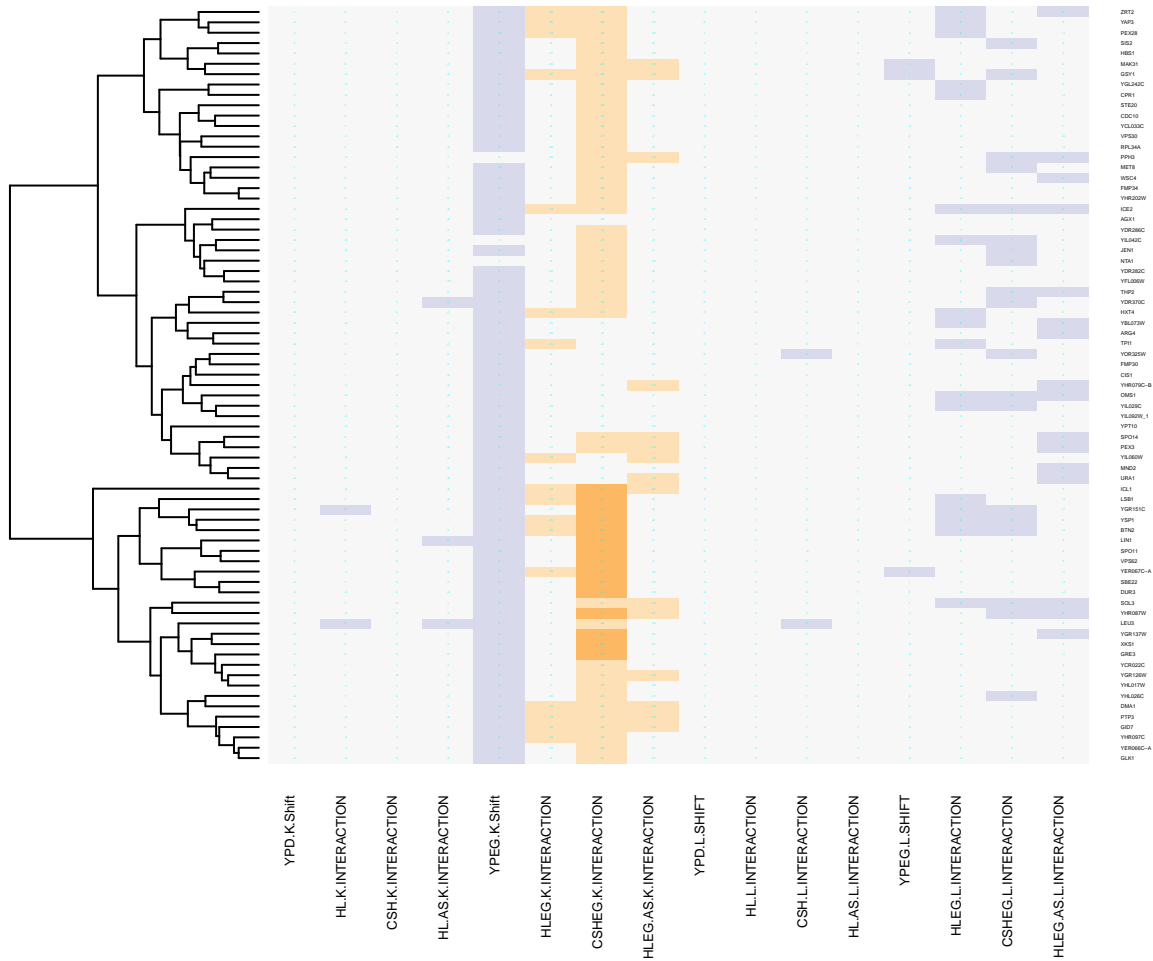

Color Key

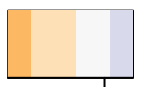

0  
Value

3-0.5.19-1

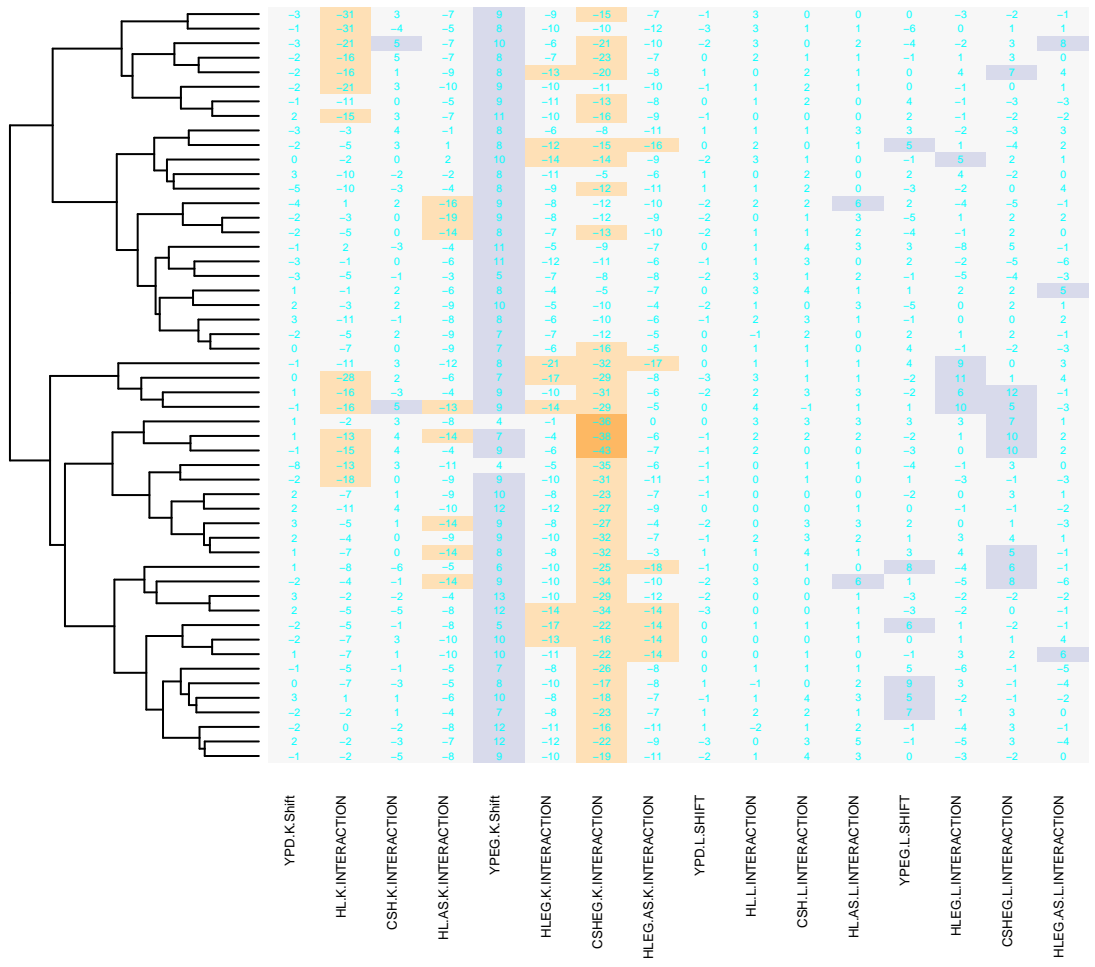

HAC1  
LAG1  
HOG1  
YDR250C  
YIL028W  
GIC2  
GAT1  
YMR073C  
THI4  
YGR131W  
YER085C  
YIL170W  
FUS1  
SPS22  
YIL089W  
YPS6  
GGA1  
PRY2  
YEN1  
YGR263C  
LSB3  
YKR047W  
EPS1  
MEH1  
KRE27  
VHS1  
YHR177W  
PCL7  
YGR266W  
MSH2  
RTT102  
YGR283C  
DID2  
PIB1  
DAK2  
ROG3  
YFR017C  
HUA1  
YGL235W\_2  
SGS1  
ECM14  
CIT2  
RPL8A  
CCP1  
YKR043C  
YCL060C  
MTO1  
DFG10  
MET32  
REV3  
YEL020C  
PRD1

Gene Name

Type of Media

Color Key

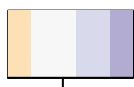

0  
Value

3-0.5.2-0

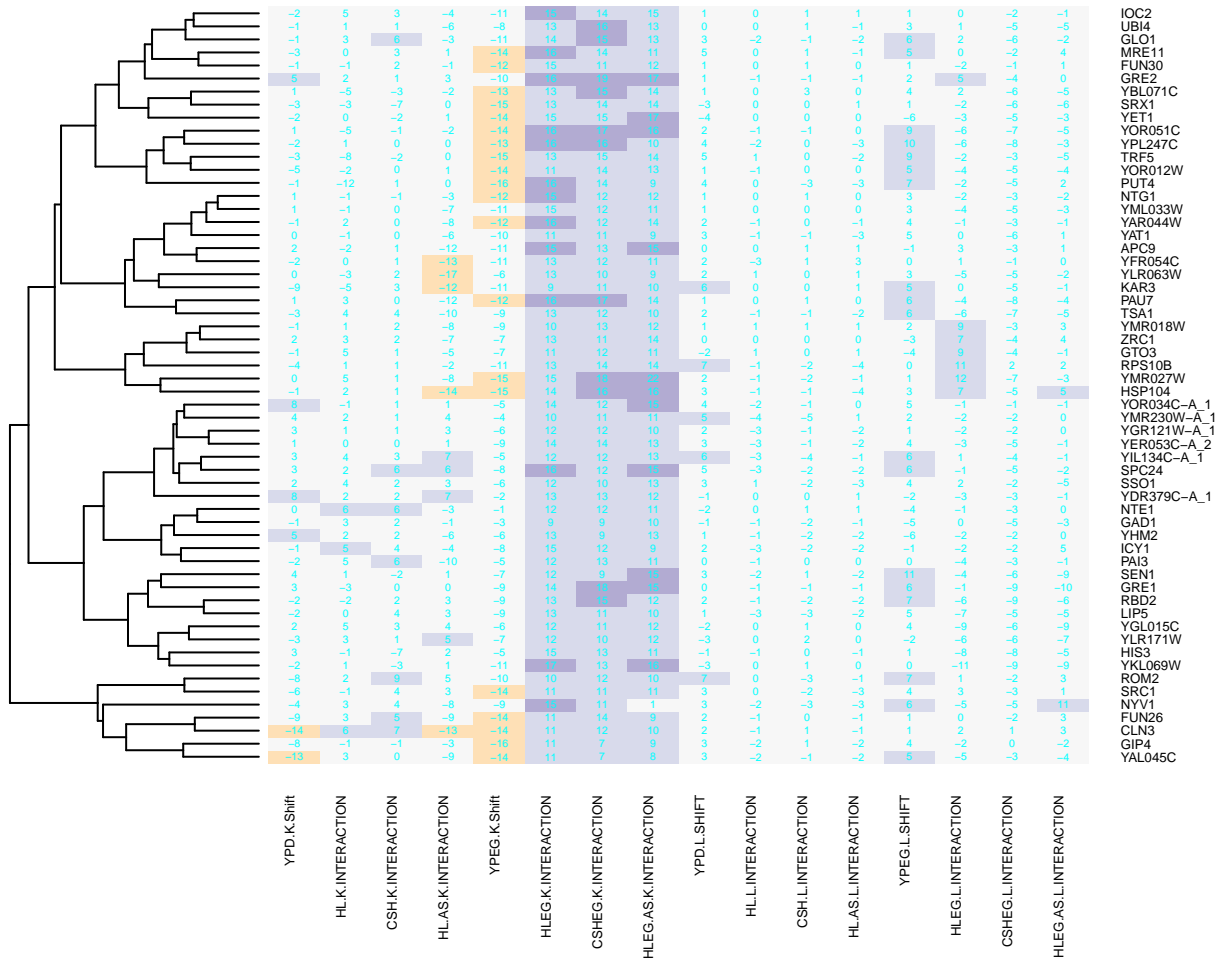

Gene Name

Type of Media

Color Key

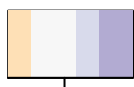

0  
Value

3-0.5.2-1

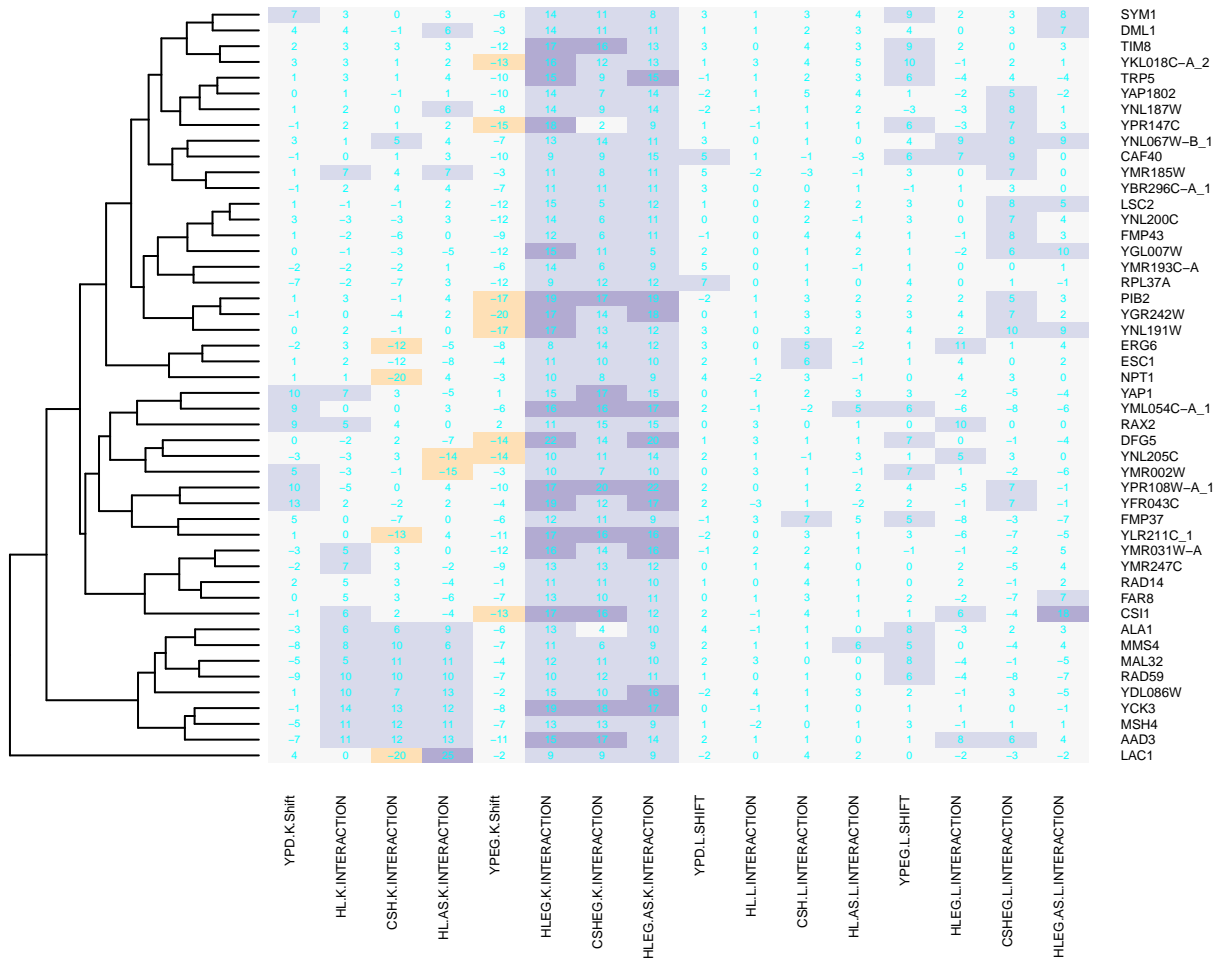

Gene Name

Type of Media



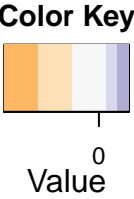

3-0.5.20-1

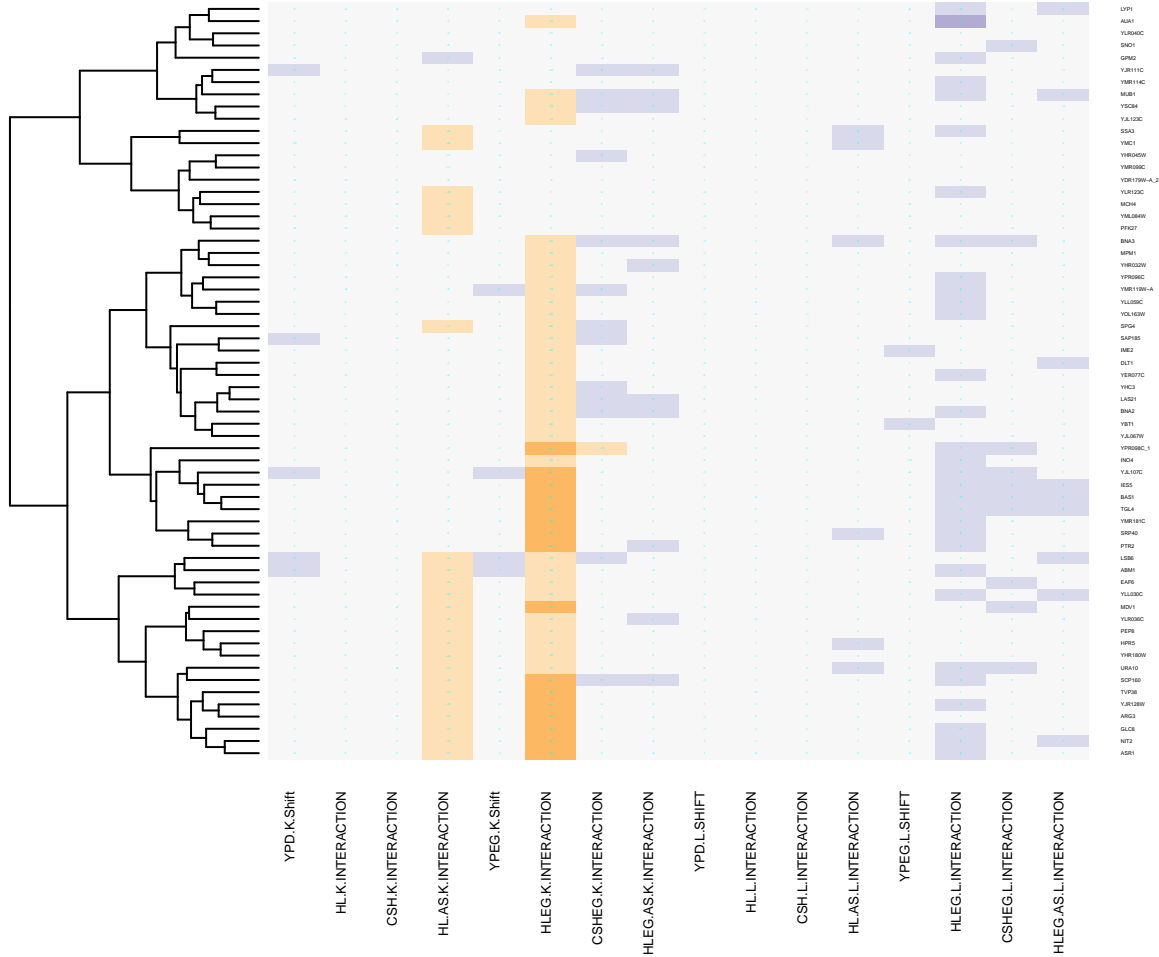

Color Key

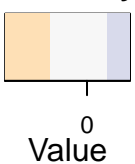

3-0.5.21-0

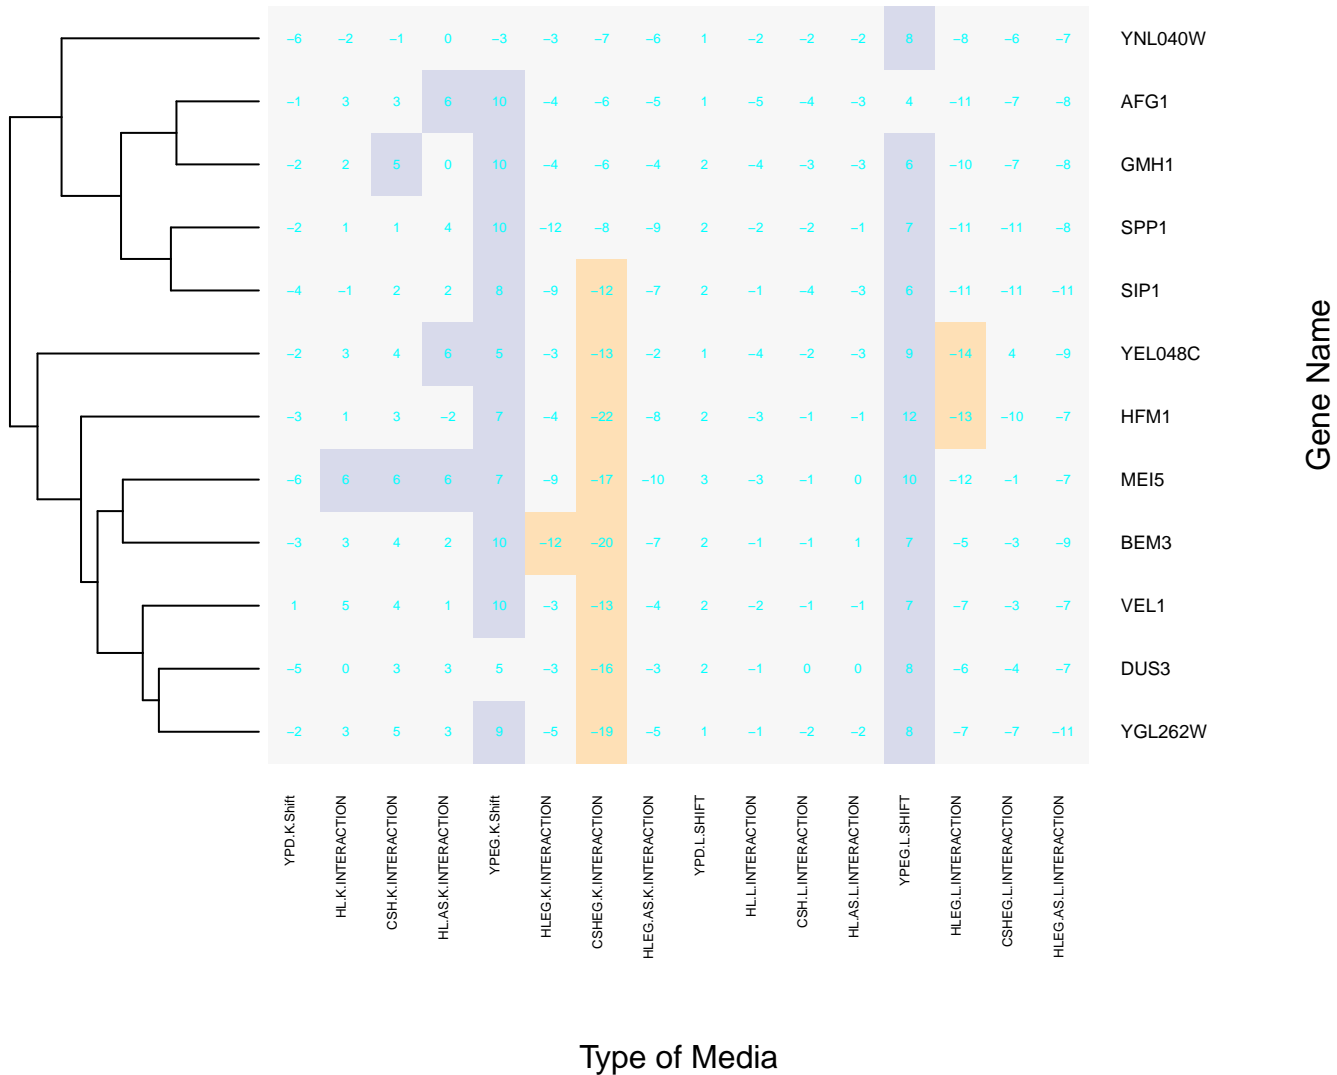

Color Key

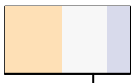

Value

3-0.5.21-1

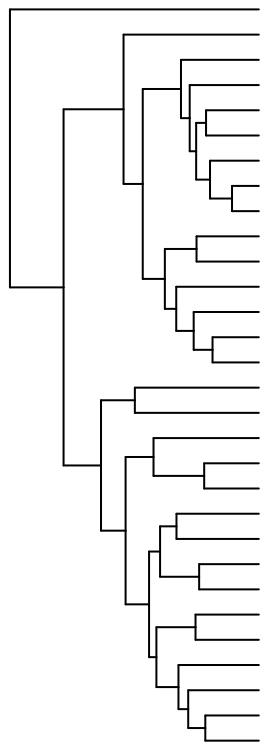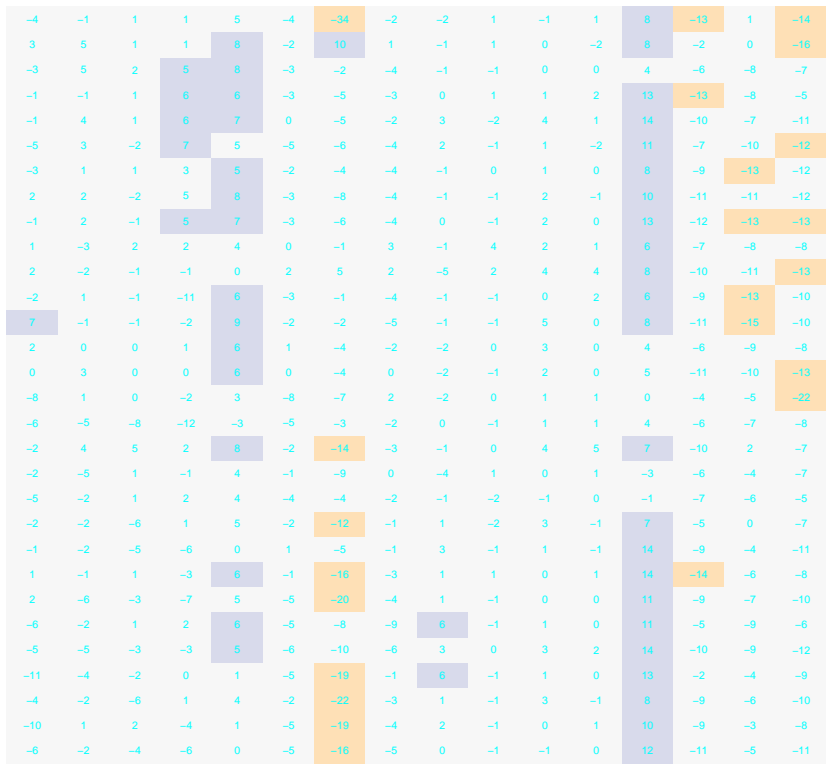

YPD.K.Shift  
HLK.INTERACTION  
CSH.K.INTERACTION  
HLAS.K.INTERACTION  
YPE.K.Shift  
HLEG.K.INTERACTION  
CSHEG.K.INTERACTION  
HLEG.AS.K.INTERACTION  
YPD.L.Shift  
HLL.INTERACTION  
CSH.L.INTERACTION  
HLAS.L.INTERACTION  
YPE.L.Shift  
HLEG.L.INTERACTION  
CSHEG.L.INTERACTION  
HLEG.AS.L.INTERACTION

YPT32  
NPA3  
RBP7  
VPS74  
PRP4  
PRP39  
FAF1  
DUT1  
SEC26  
YNL057W  
TCB1  
NUP159  
SPC1  
CDC20  
UBA2  
RPN10  
PTK2  
YGL196W\_1  
YJL216C  
MUS81  
VAM7  
VAM10  
BOP2  
SYM1  
SMT3  
YRB1  
NCS6  
MET17  
VAC14  
VPS54

Gene Name

Type of Media

Color Key

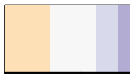

0  
Value

3-0.5.21-2

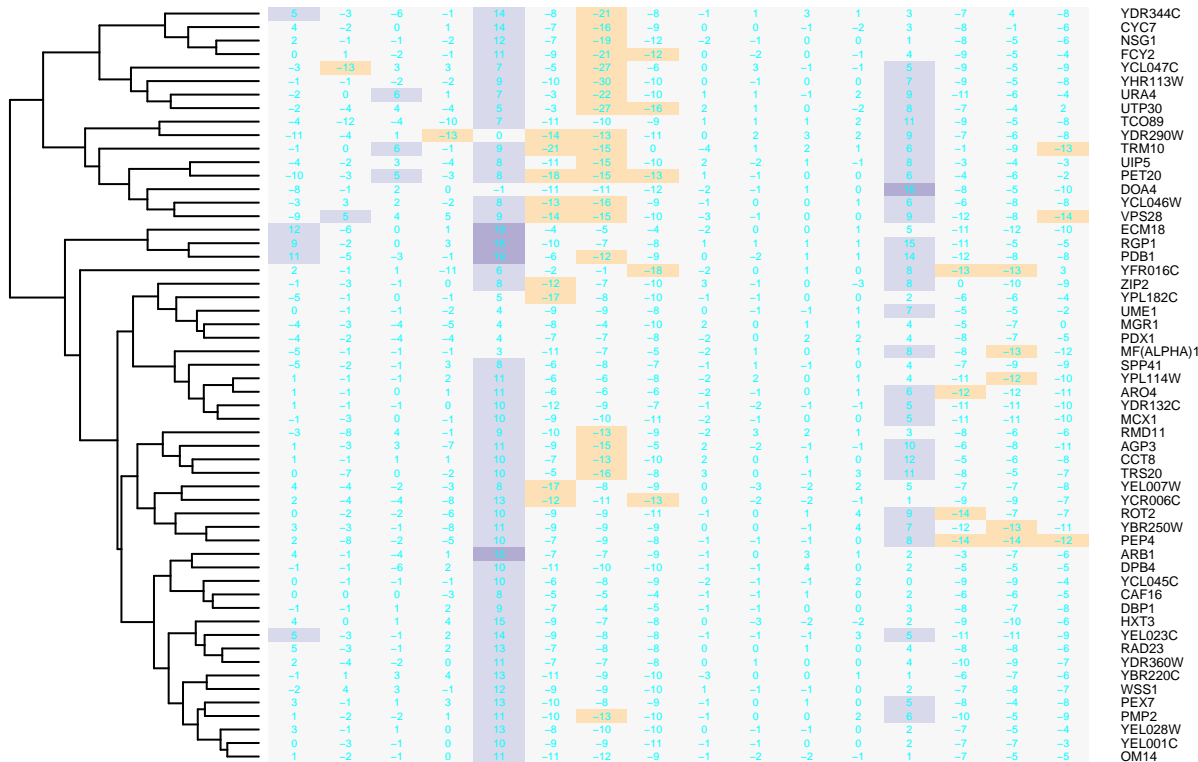

Gene Name

Type of Media

○

**3-0.5.23-0**

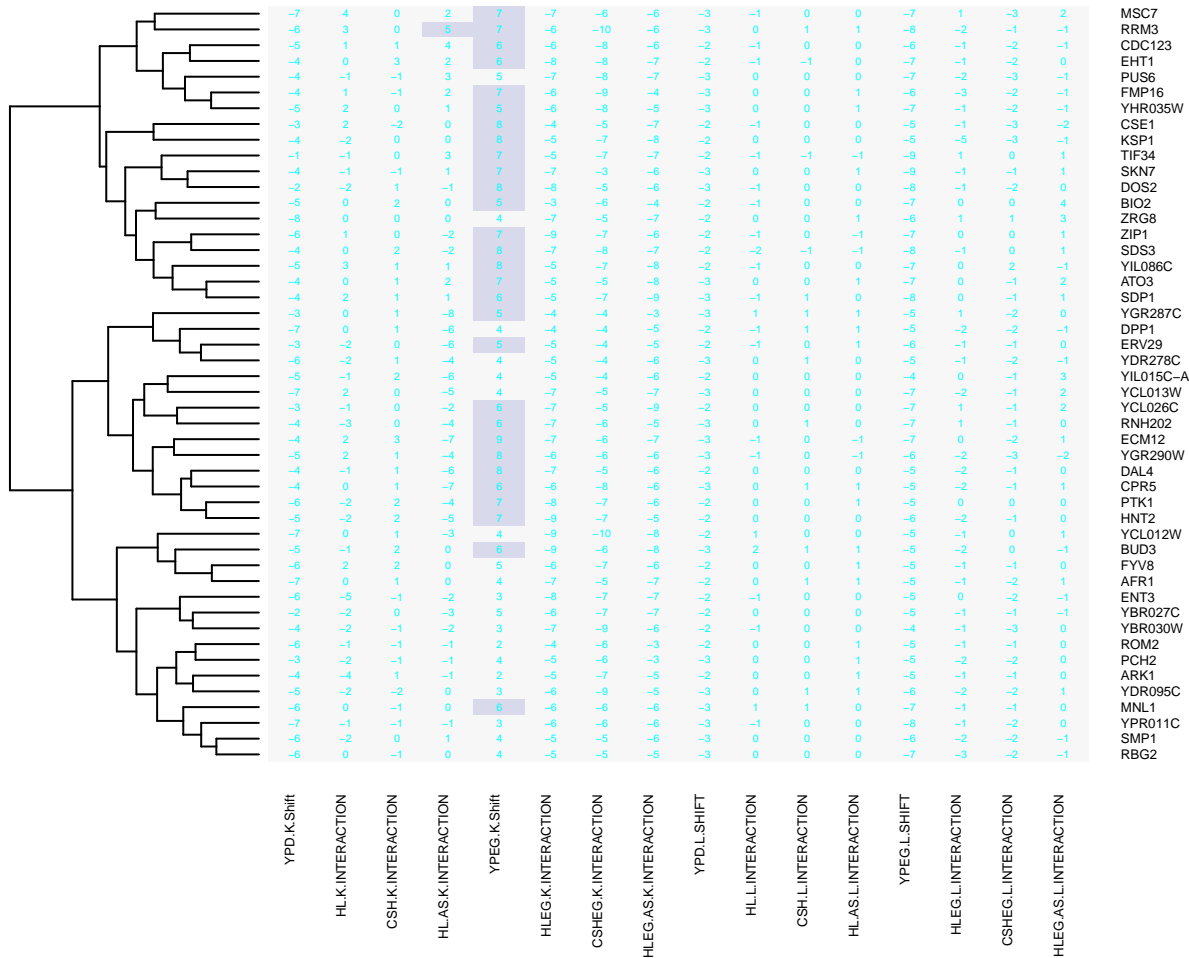

Gene Name

## Type of Media

Color Key

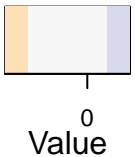

3-0.5.23-1

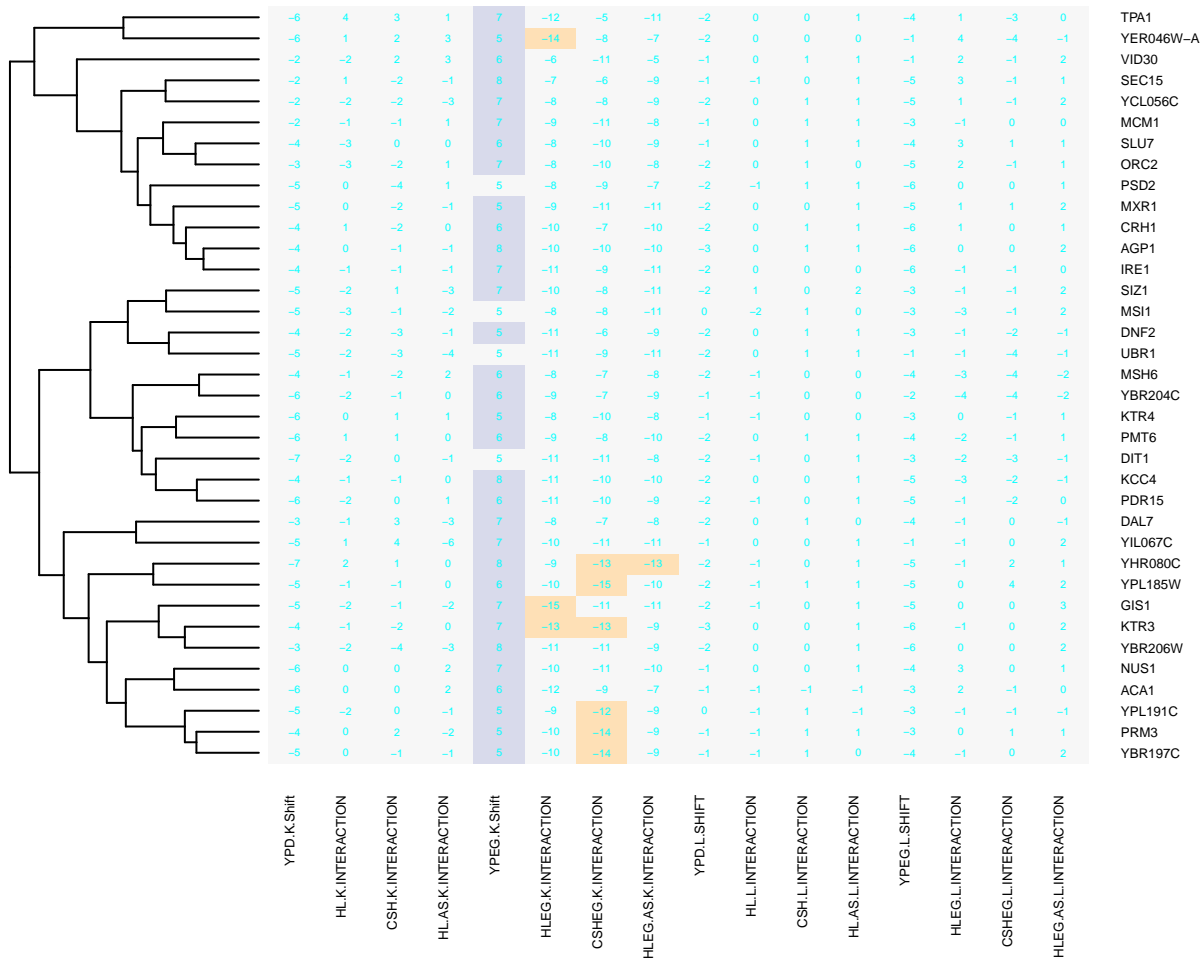

Gene Name

Type of Media

Color Key

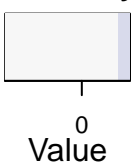

3-0.5.23-2

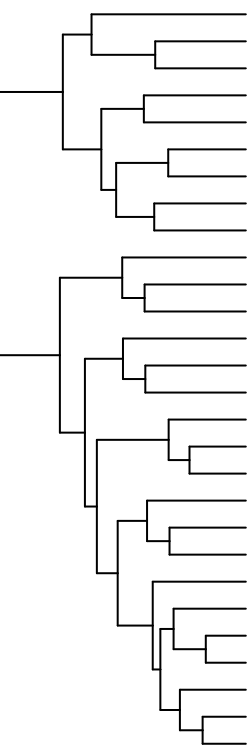

|     |    |    |     |   |     |     |    |    |    |   |    |    |    |    |    |
|-----|----|----|-----|---|-----|-----|----|----|----|---|----|----|----|----|----|
| -9  | -2 | 0  | -5  | 5 | -10 | -9  | -8 | -1 | 0  | 0 | 0  | -5 | 3  | 3  | 4  |
| -8  | 0  | 7  | -7  | 3 | -7  | -5  | -5 | -2 | 0  | 1 | 0  | -4 | 3  | 3  | 2  |
| -10 | -2 | 6  | -6  | 4 | -7  | -8  | -8 | -1 | 0  | 0 | -1 | -5 | 2  | 5  | 2  |
| -7  | -4 | 3  | -3  | 2 | -9  | -5  | -7 | -2 | 0  | 0 | 0  | -2 | -2 | 0  | -1 |
| -10 | -4 | 4  | -7  | 2 | -8  | -4  | -5 | -1 | 0  | 0 | 0  | -3 | 0  | -2 | 0  |
| -8  | 2  | 4  | -5  | 3 | -9  | -6  | -8 | -1 | -1 | 0 | 0  | -3 | 0  | -2 | -1 |
| -11 | 1  | 5  | -8  | 4 | -8  | -6  | -7 | -1 | -1 | 0 | 1  | -4 | -1 | -2 | -1 |
| -5  | -1 | 1  | -7  | 4 | -8  | -7  | -9 | -2 | 0  | 0 | 0  | -3 | 1  | -2 | 1  |
| -8  | -1 | 2  | -10 | 5 | -9  | -5  | -7 | -1 | -1 | 0 | -1 | -3 | -1 | -1 | 0  |
| -9  | 5  | 4  | -1  | 5 | -6  | -5  | -5 | -1 | -1 | 0 | -1 | -4 | -1 | -1 | -1 |
| -8  | 0  | 1  | 2   | 2 | -7  | -6  | -5 | -1 | -1 | 0 | -1 | -5 | -1 | 0  | -2 |
| -10 | 0  | 3  | 1   | 2 | -6  | -4  | -6 | -1 | -1 | 0 | 0  | -2 | -3 | -4 | -2 |
| -7  | 2  | 4  | -4  | 6 | -7  | -6  | -9 | 0  | -1 | 1 | 2  | -3 | 1  | 3  | 0  |
| -9  | 3  | 3  | -2  | 5 | -8  | -9  | -8 | -2 | 0  | 2 | 1  | -3 | -1 | -1 | -1 |
| -10 | 3  | 0  | -4  | 3 | -8  | -6  | -9 | -2 | 0  | 0 | 1  | -4 | 0  | -1 | 1  |
| -7  | 2  | -1 | 1   | 4 | -5  | -9  | -5 | -2 | 0  | 0 | 1  | -5 | -1 | 3  | 0  |
| -8  | 1  | 0  | 0   | 3 | -8  | -9  | -6 | -2 | 0  | 0 | 1  | -4 | -1 | 1  | 1  |
| -9  | 0  | 0  | -1  | 3 | -7  | -10 | -7 | -2 | 0  | 0 | 1  | -4 | -2 | 4  | 0  |
| -7  | -2 | 0  | 1   | 3 | -10 | -9  | -6 | -1 | -1 | 0 | 0  | -5 | 1  | 1  | 2  |
| -8  | -1 | 2  | -2  | 3 | -9  | -7  | -6 | -2 | 0  | 0 | 0  | -4 | 2  | 1  | -1 |
| -6  | 0  | 0  | -2  | 3 | -8  | -6  | -7 | -1 | -1 | 0 | 0  | -6 | 2  | 0  | 2  |
| -7  | 0  | 0  | 0   | 5 | -10 | -8  | -9 | 0  | -1 | 0 | -1 | -3 | -2 | -3 | 1  |
| -8  | 1  | 3  | 2   | 4 | -9  | -6  | -7 | -2 | -1 | 0 | 0  | -5 | 0  | -1 | 1  |
| -8  | 0  | 2  | 2   | 5 | -7  | -6  | -8 | -2 | -1 | 1 | 0  | -3 | -2 | -2 | 1  |
| -8  | 0  | 1  | 2   | 6 | -7  | -6  | -8 | -2 | -1 | 1 | 0  | -5 | -2 | -2 | 0  |
| -9  | 0  | 1  | -1  | 3 | -9  | -6  | -7 | -1 | -1 | 0 | 0  | -3 | 0  | -1 | -1 |
| -8  | 1  | 1  | 1   | 4 | -9  | -7  | -8 | -2 | 0  | 2 | 1  | -4 | 0  | 0  | 0  |
| -9  | 1  | 1  | 0   | 3 | -9  | -6  | -9 | -2 | 0  | 1 | 1  | -4 | -1 | -1 | 0  |

- DPH2
- YIA6
- NAS2
- PMP3
- BSC2
- YKL206C
- IGO1
- SSD1
- YVH1
- NSG2
- FIR1
- CSM4
- DCC1
- ASI2
- OSH3
- ISC1
- GBP2
- YGR176W
- YIG1
- MTH1
- RIF2
- HPT1
- URH1
- YBR178W
- TPK2
- YDR089W
- DIT2
- YER030W

Gene Name

- YPD.K.Shift
- HLK.INTERACTION
- CSH.K.INTERACTION
- HLAS.K.INTERACTION
- YPG.K.Shift
- HLEG.K.INTERACTION
- CSHEG.K.INTERACTION
- HLEG.AS.K.INTERACTION
- YPD.L.Shift
- HLL.INTERACTION
- CSH.L.INTERACTION
- HLAS.L.INTERACTION
- YPG.L.Shift
- HLEG.L.INTERACTION
- CSHEG.L.INTERACTION
- HLEG.AS.L.INTERACTION

Type of Media

Color Key

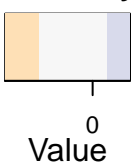

3-0.5.23-3

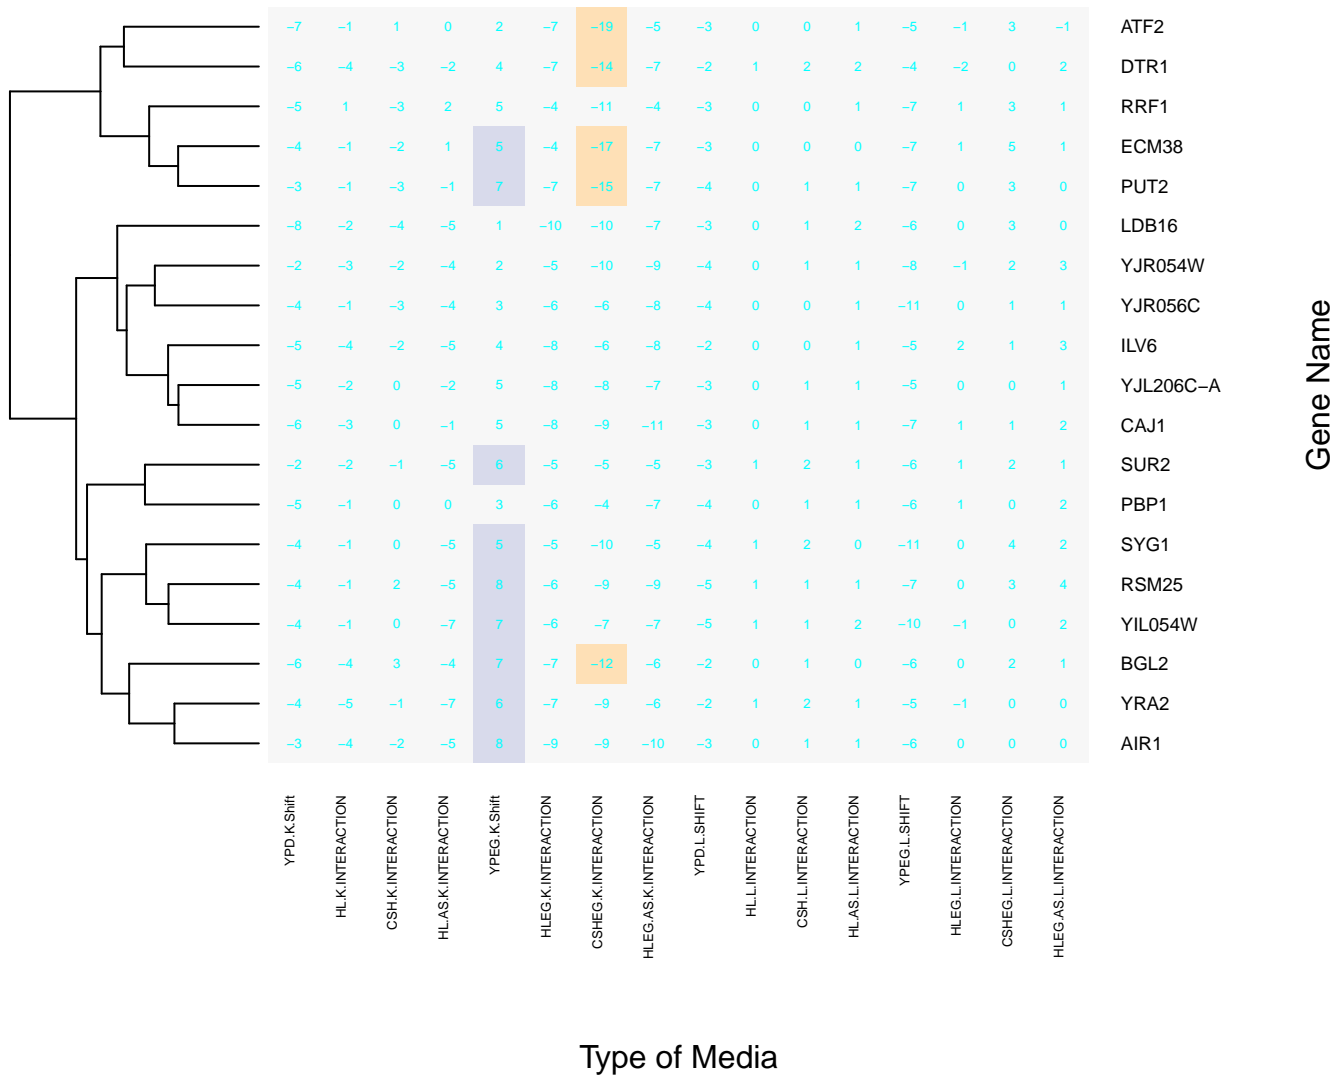

Color Key

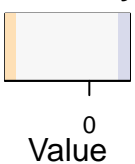

3-0.5.23-4

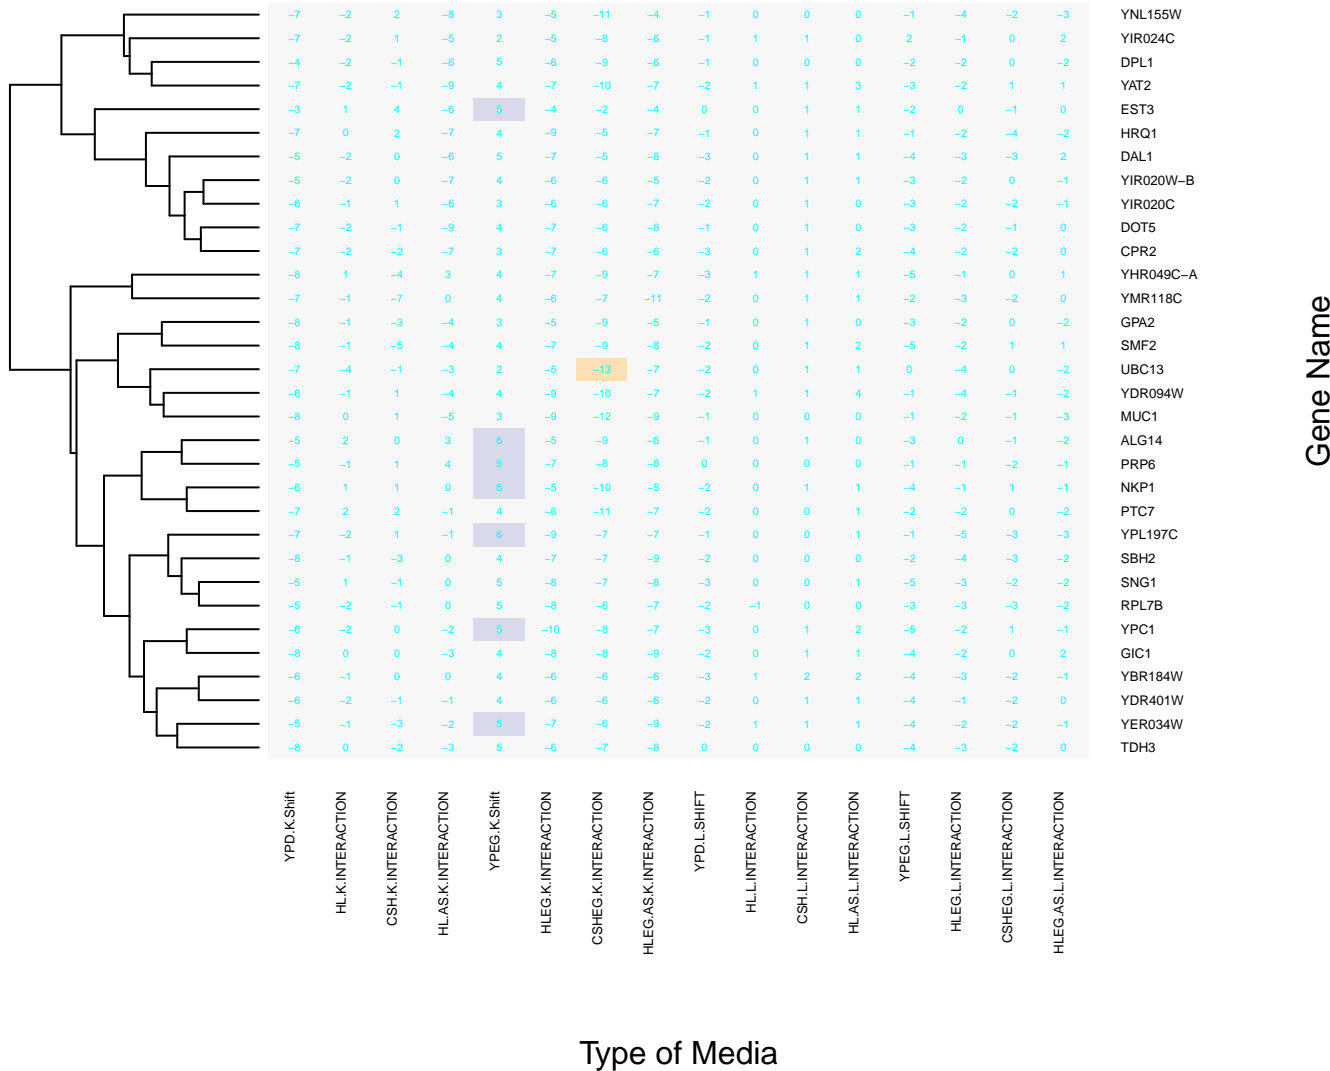

Color Key

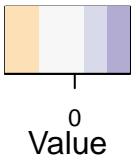

3-0.5.24-0

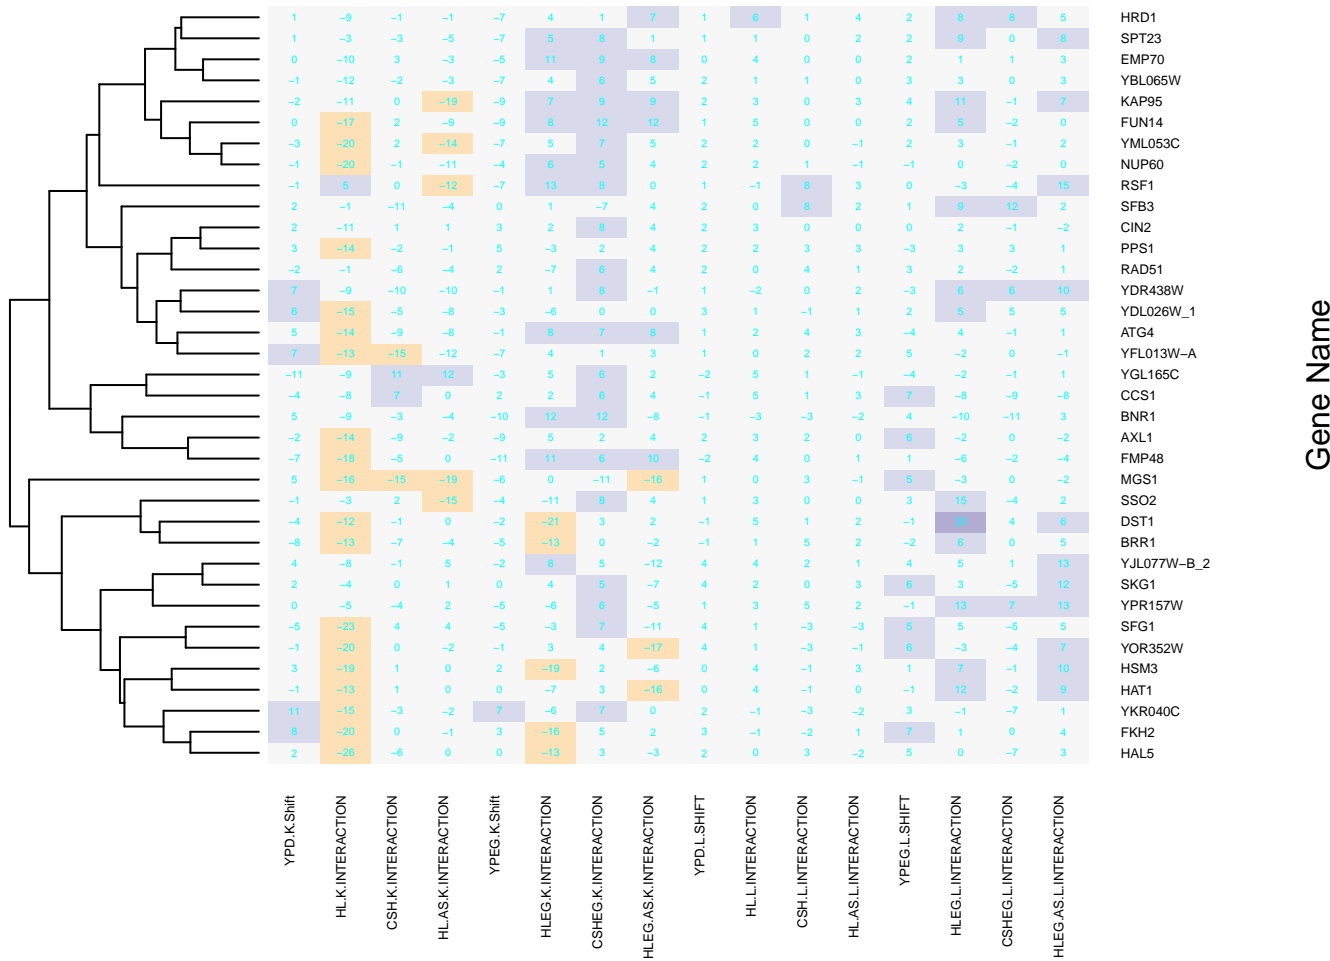

Color Key

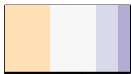

Value

3-0.5.24-1

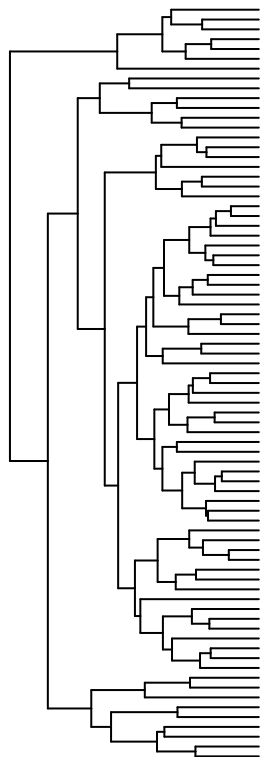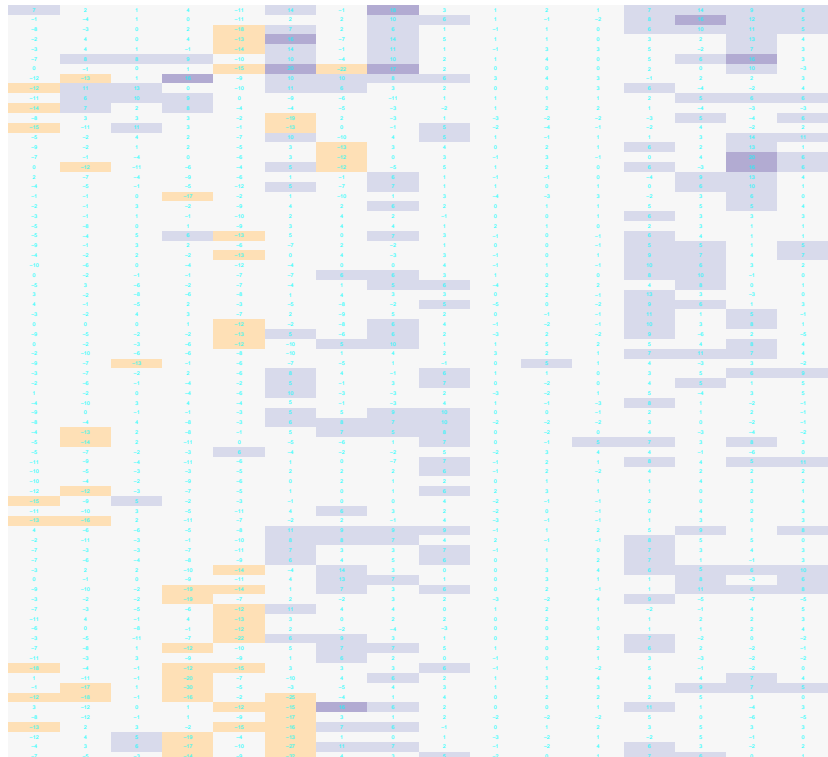

YPL08W-A\_1  
BET2  
COX13  
KAP122  
TPO3  
BRE1  
STE13  
RPS16A  
RPO2  
ALO1  
YBR147W  
CUE4  
MSC1  
FIN3  
NOC4  
IPK1  
NPL4  
NPR1  
YCR099C  
YLR346C  
SPT8  
GCR6  
HAC1  
SSA1  
PET127  
YNL067W-B\_2  
SPR73  
FMP25  
SDC1  
BUD14  
PEX11  
TOM6  
FTS3  
VAM6  
TAX4  
CKB2  
MCH5  
GCR2  
YTM1  
ULM1  
YOR385W  
SEC61  
LUL1  
YNL226W  
YNL120C  
RPI1  
SRB2  
VSP75  
CDC50  
NOP12  
YPR045C  
YBR085C-A\_2  
SUS1  
RPS16B  
WH5  
NCS6  
RPL42A  
ATP20  
SRD5  
CCR4  
YOR455C  
YMR148W  
RTS1  
MDH1  
HSV2  
CTF4  
YGL046W  
UAF30  
YPR014C  
ALG9  
MED1  
FLR1  
YNL024C  
MAK3  
YBK3  
YPR015C  
CTF5

Gene Name

YPD.K.Shift  
HLL.INTERACTION  
CSH.K.INTERACTION  
HLAS.K.INTERACTION  
YPG.K.Shift  
HLEG.K.INTERACTION  
CSHEG.K.INTERACTION  
HLEG.AS.K.INTERACTION  
YPD.L.Shift  
HLL.INTERACTION  
CSH.L.INTERACTION  
HLAS.L.INTERACTION  
YPG.L.Shift  
HLEG.L.INTERACTION  
CSHEG.L.INTERACTION  
HLEG.AS.L.INTERACTION

Type of Media

Color Key

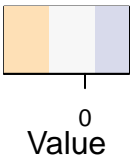

3-0.5.25-0

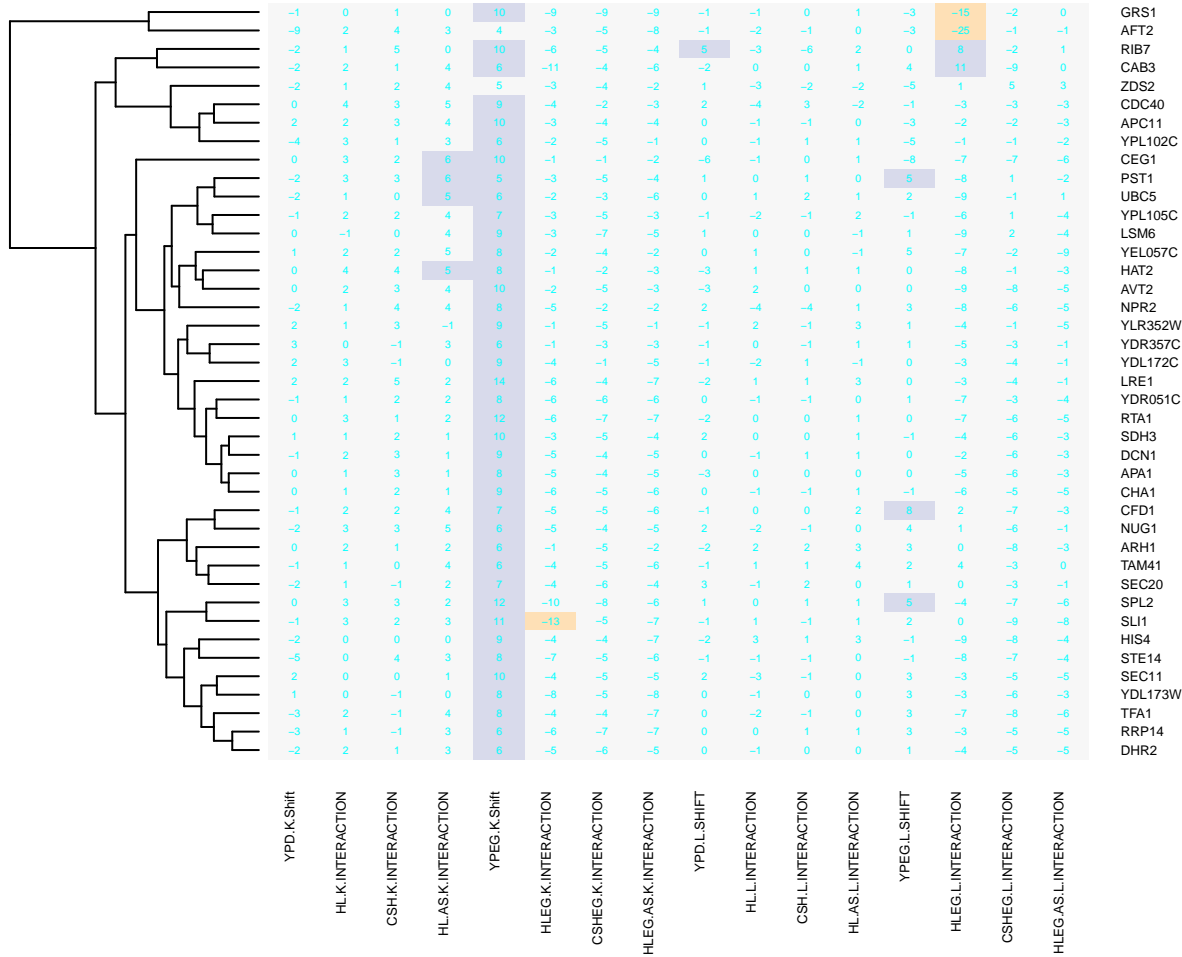

Color Key

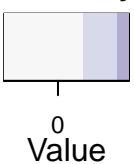

3-0.5.25-1

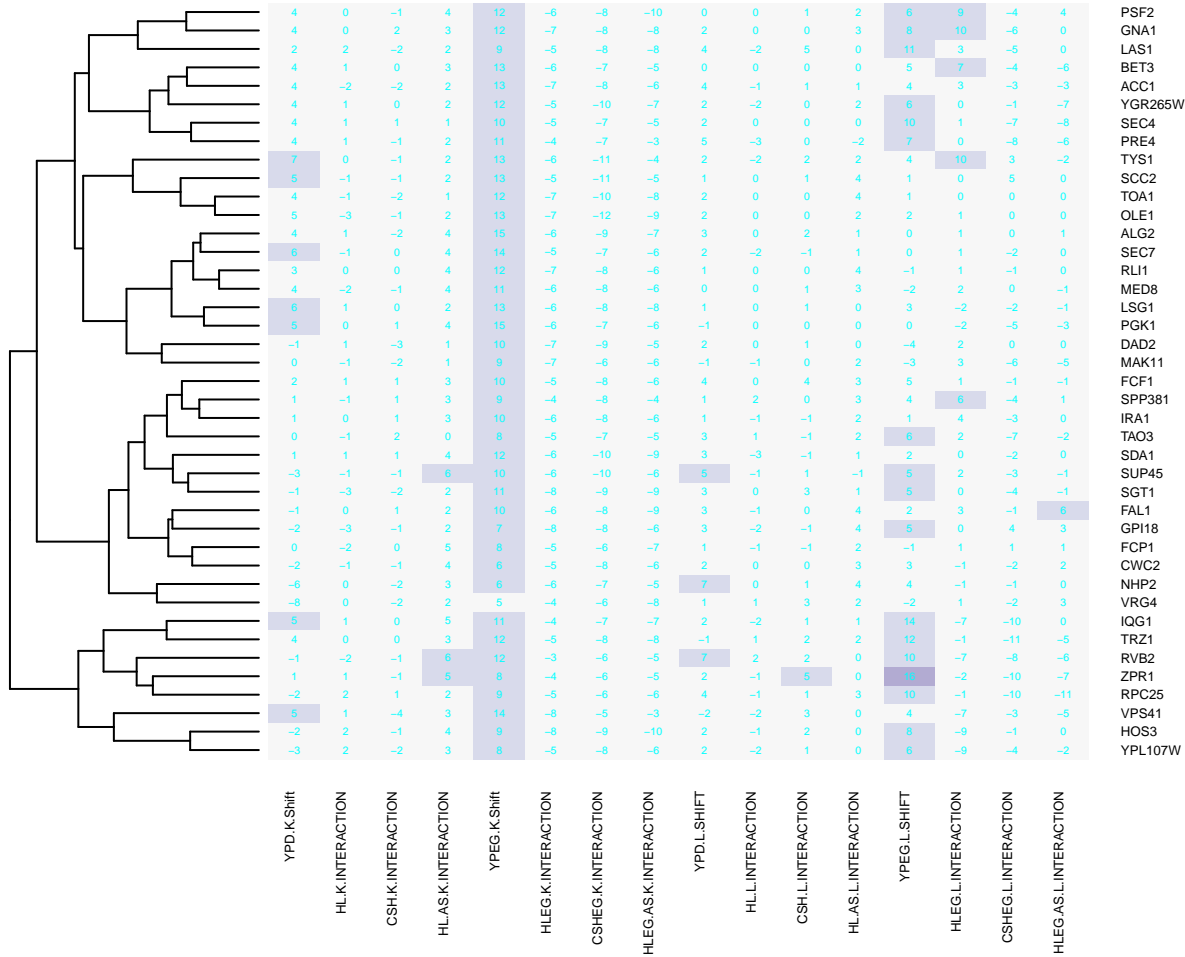

Color Key

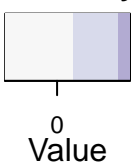

3-0.5.25-2

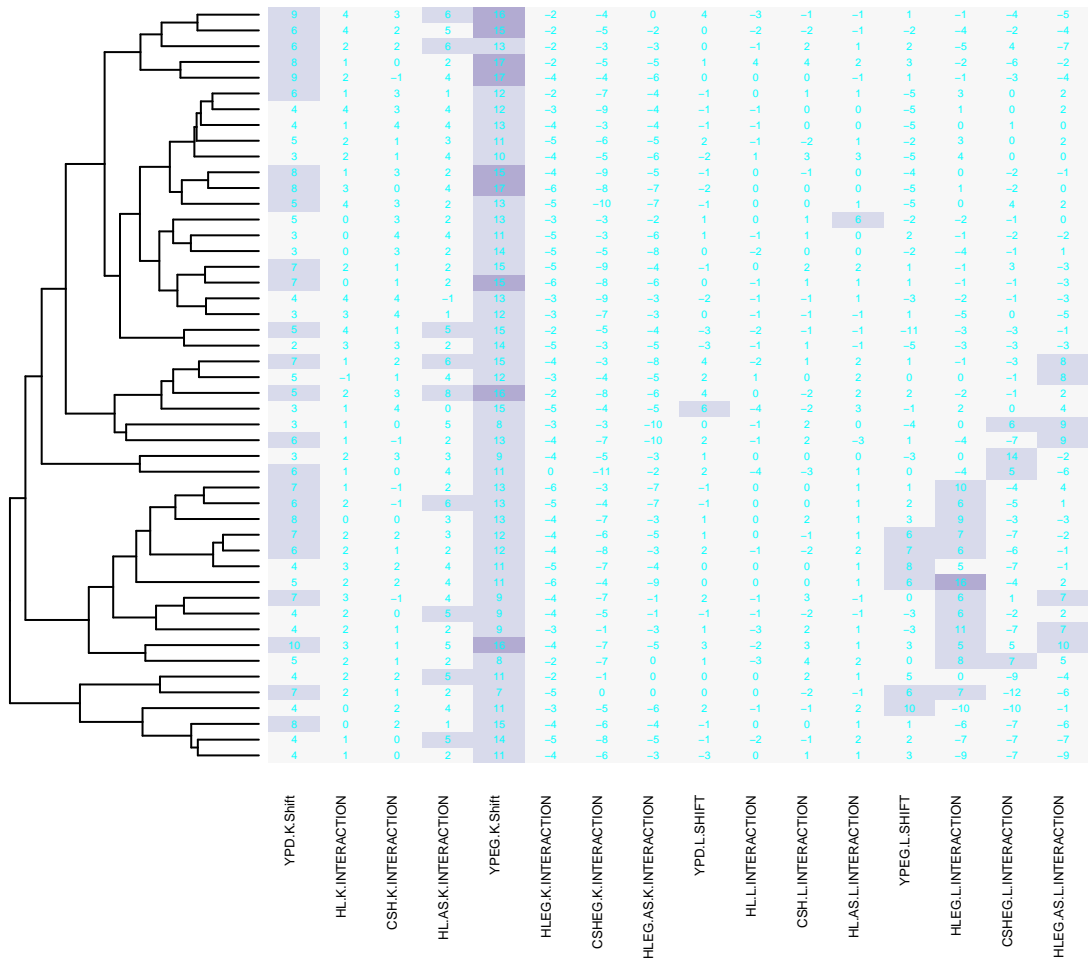

Gene Name

Type of Media

Color Key

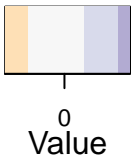

3-0.5.25-3

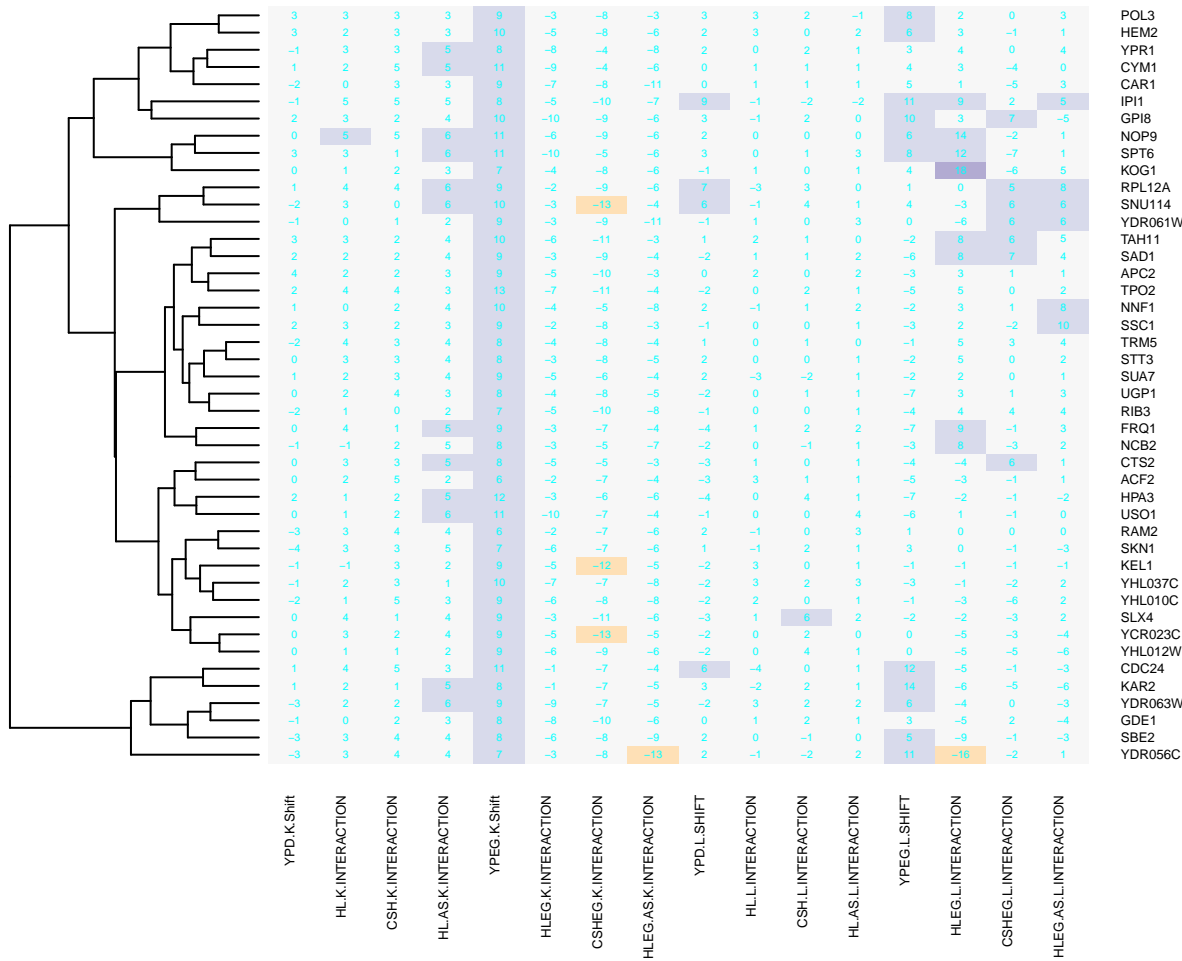

Gene Name

Color Key

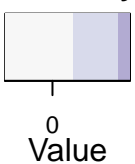

3-0.5.26-0

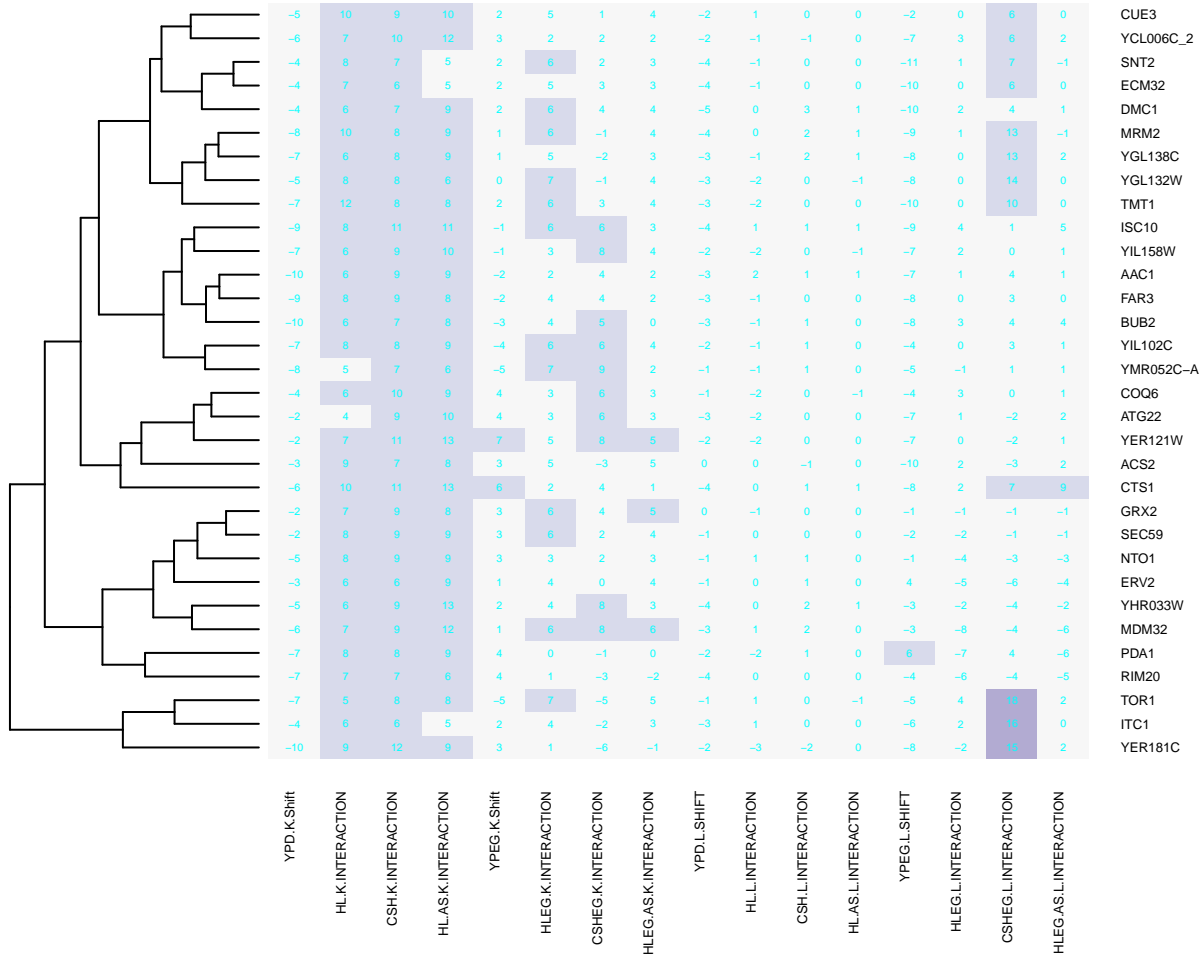

Color Key

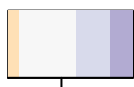

0  
Value

3-0.5.26-1

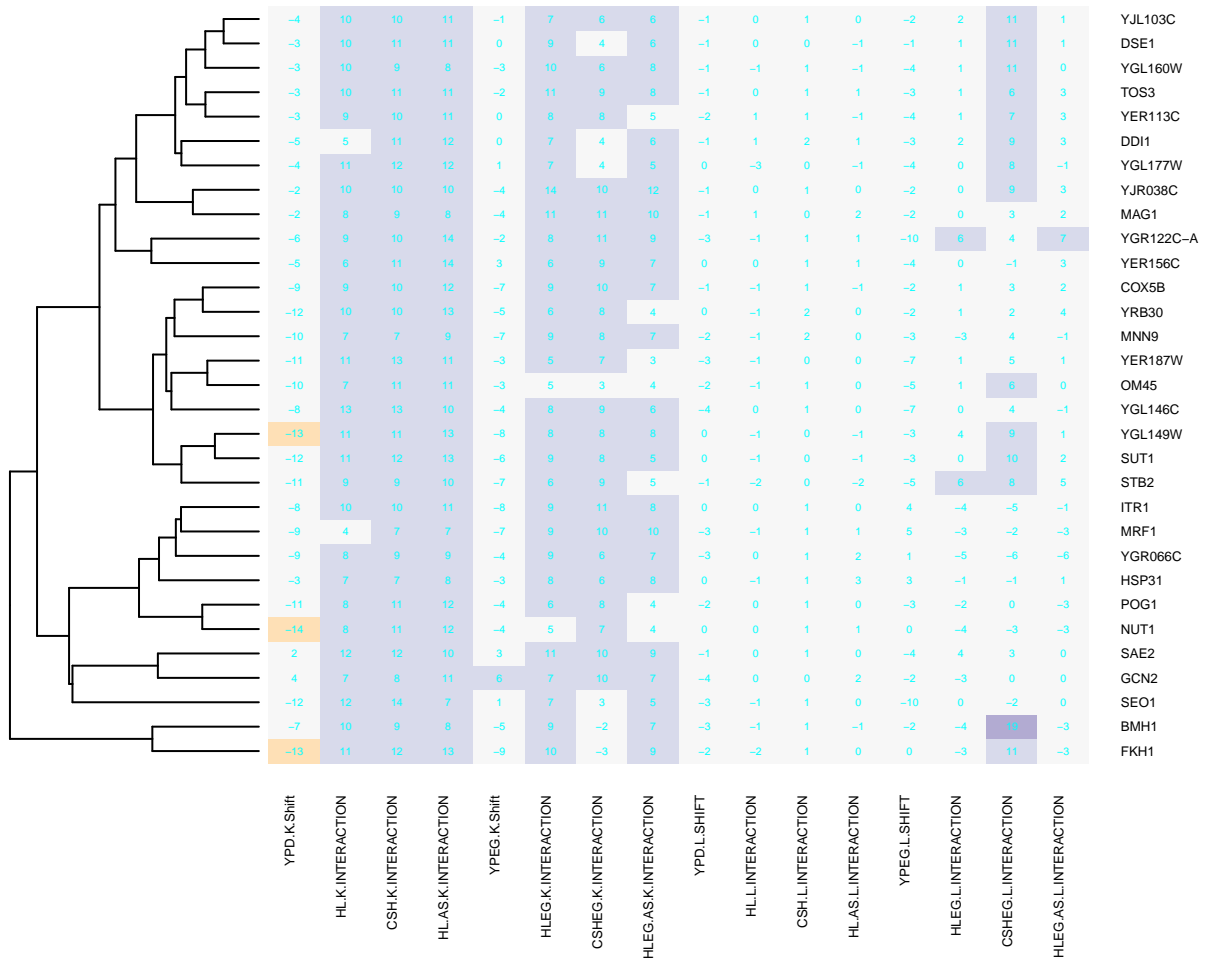

Gene Name

Type of Media

Color Key

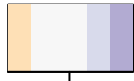

0  
Value

3-0.5.27-0

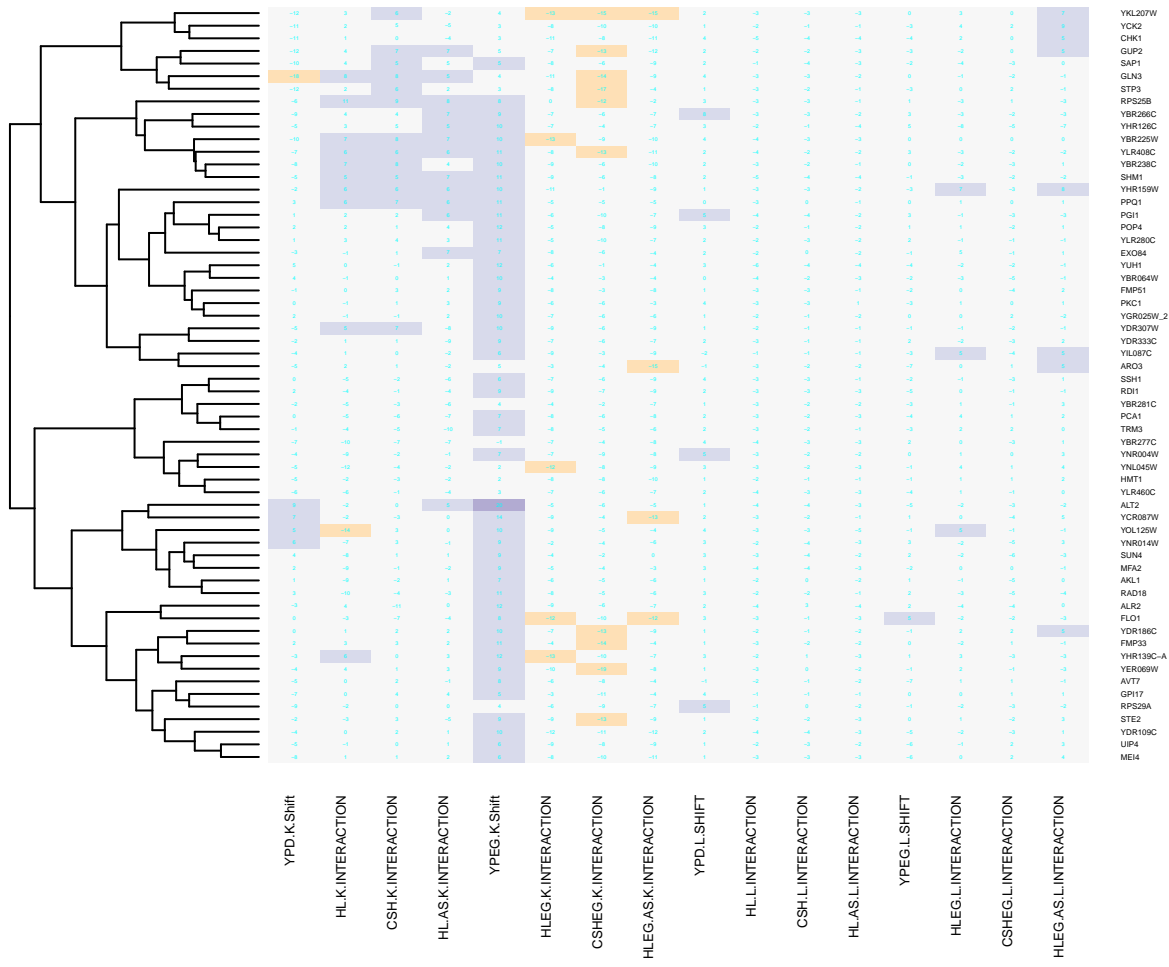

Gene Name

Type of Media

Color Key

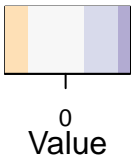

3-0.5.27-1

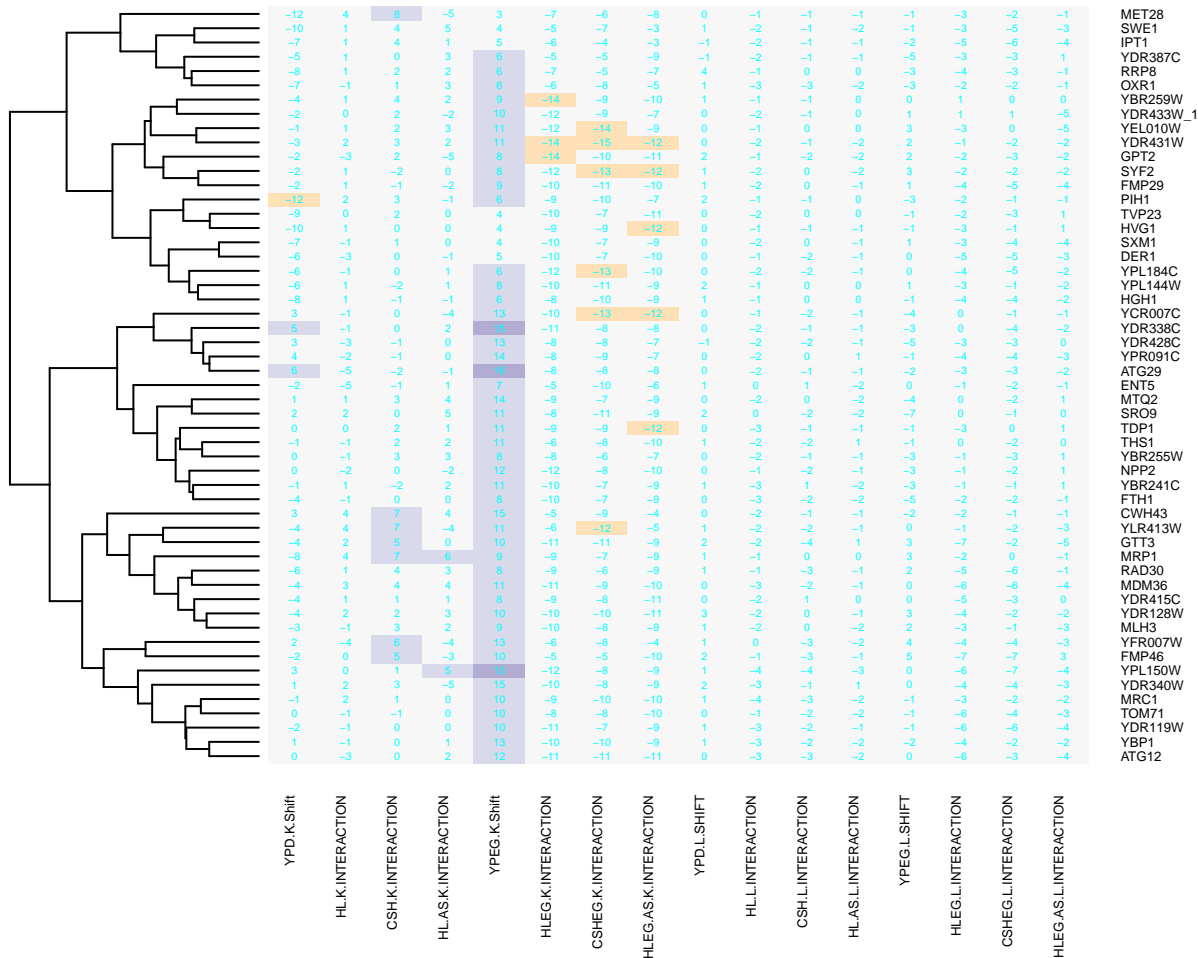

Gene Name

Type of Media

Color Key

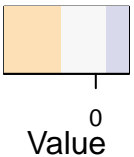

3-0.5.28-0

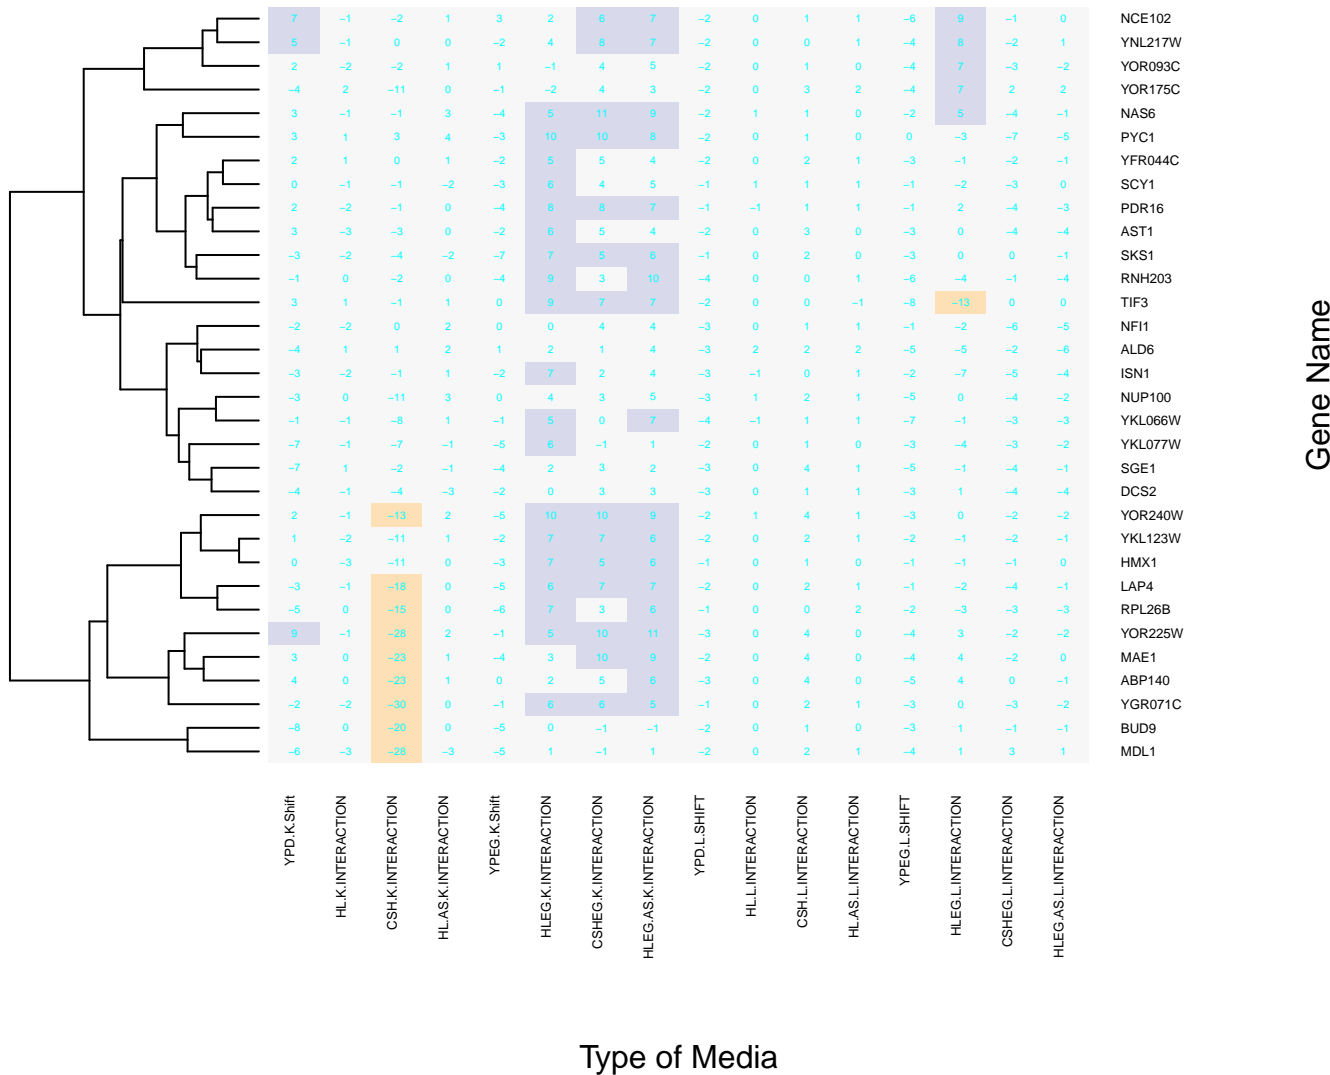

Color Key

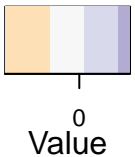

3-0.5.28-1

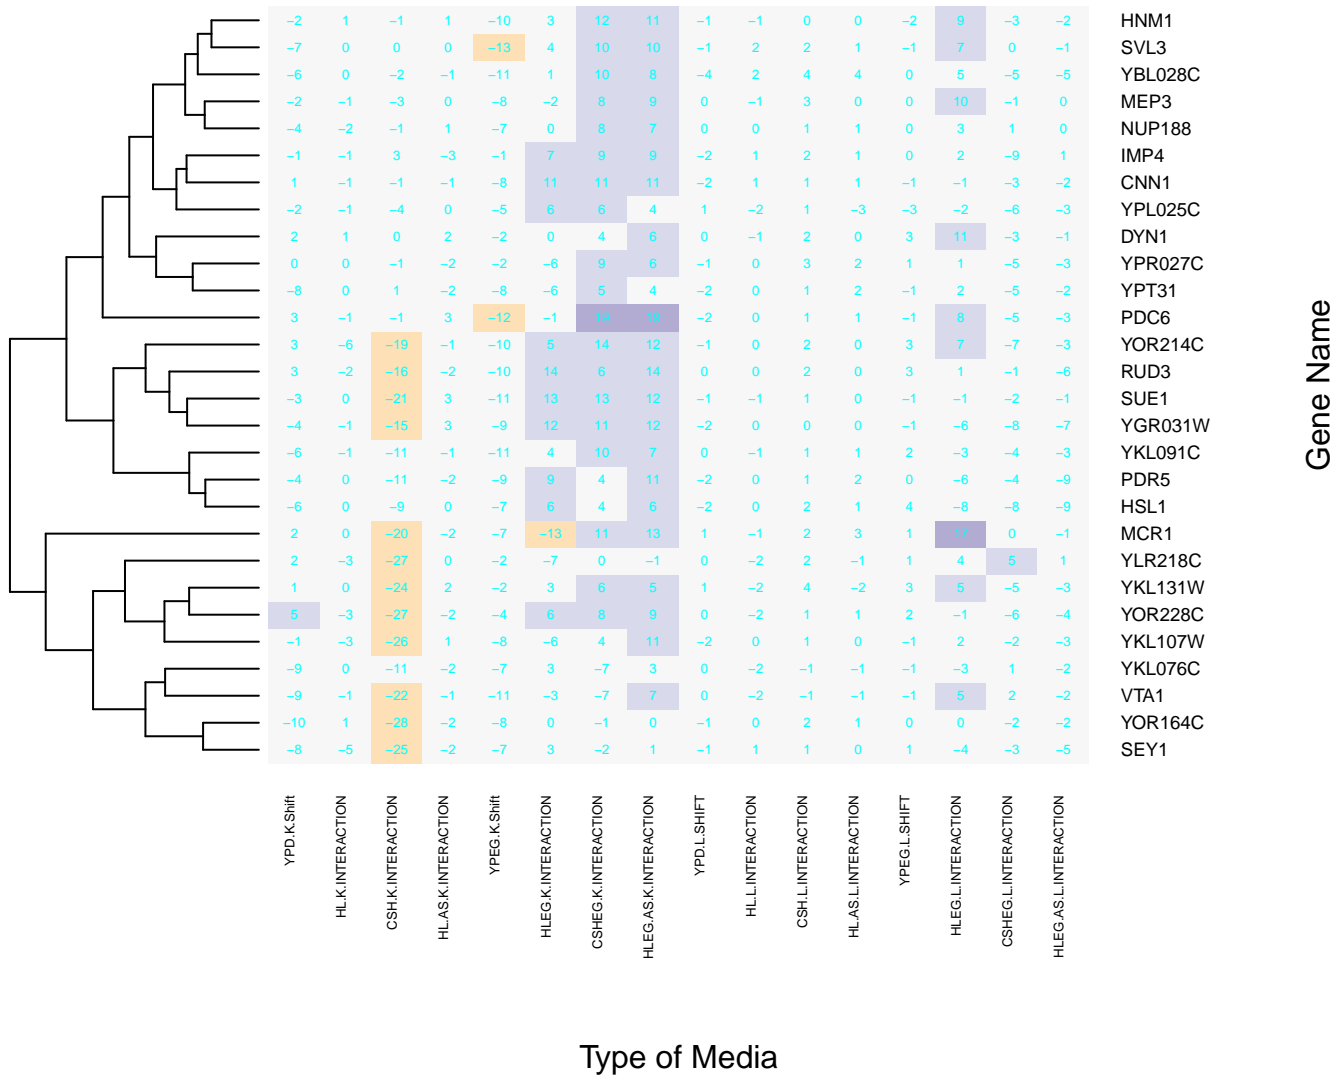

Color Key

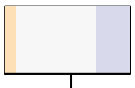

0  
Value

3-0.5.29-0

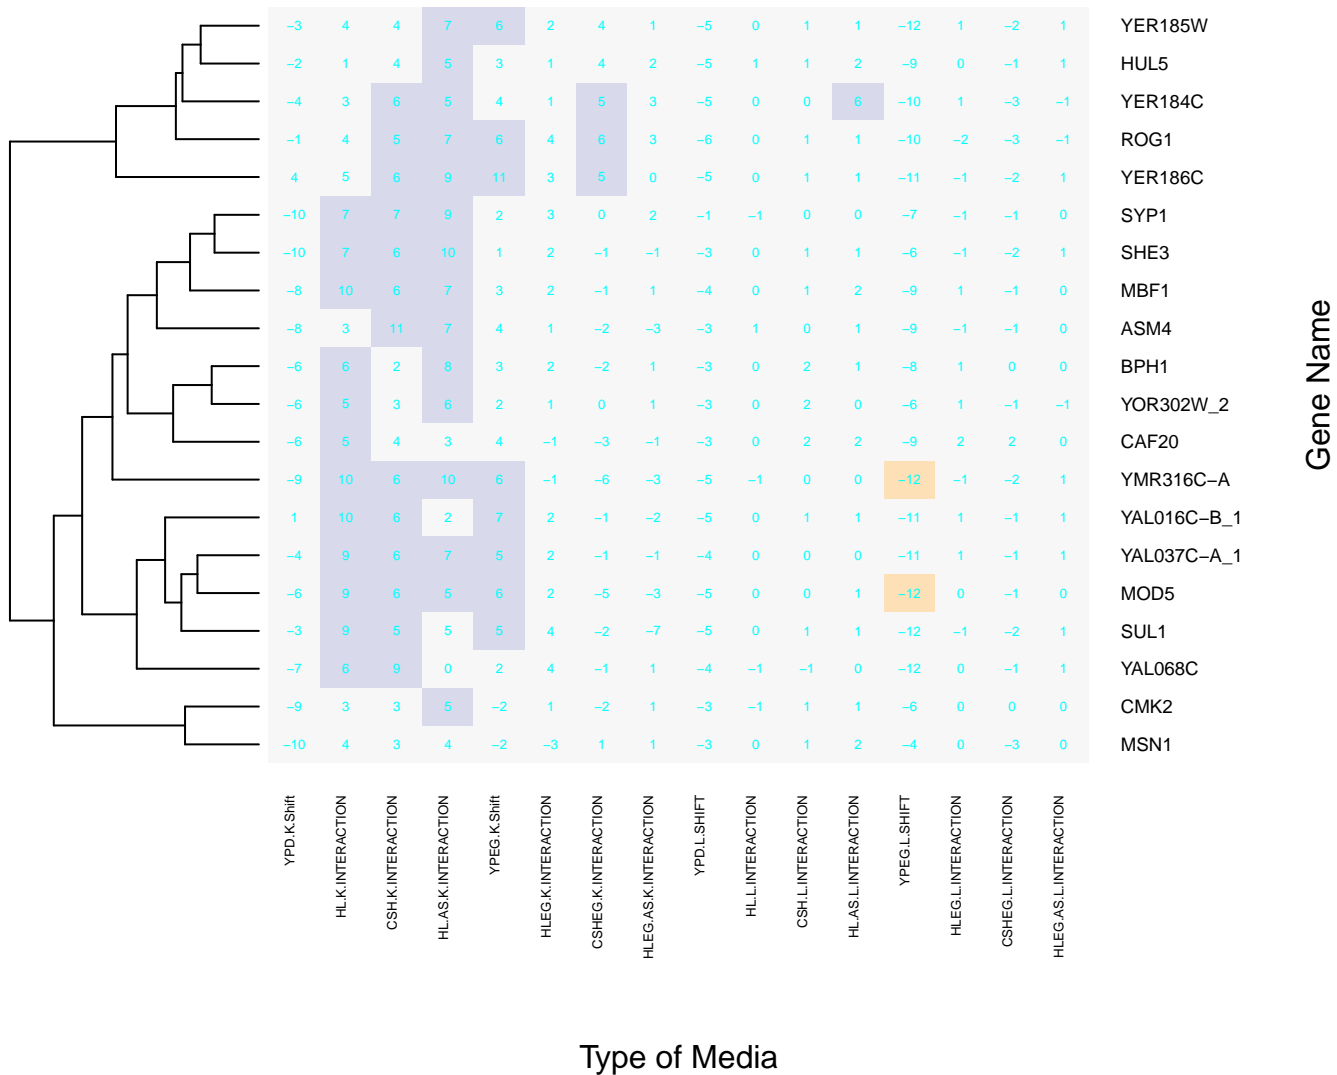

Color Key

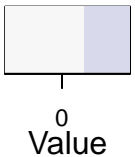

3-0.5.29-1

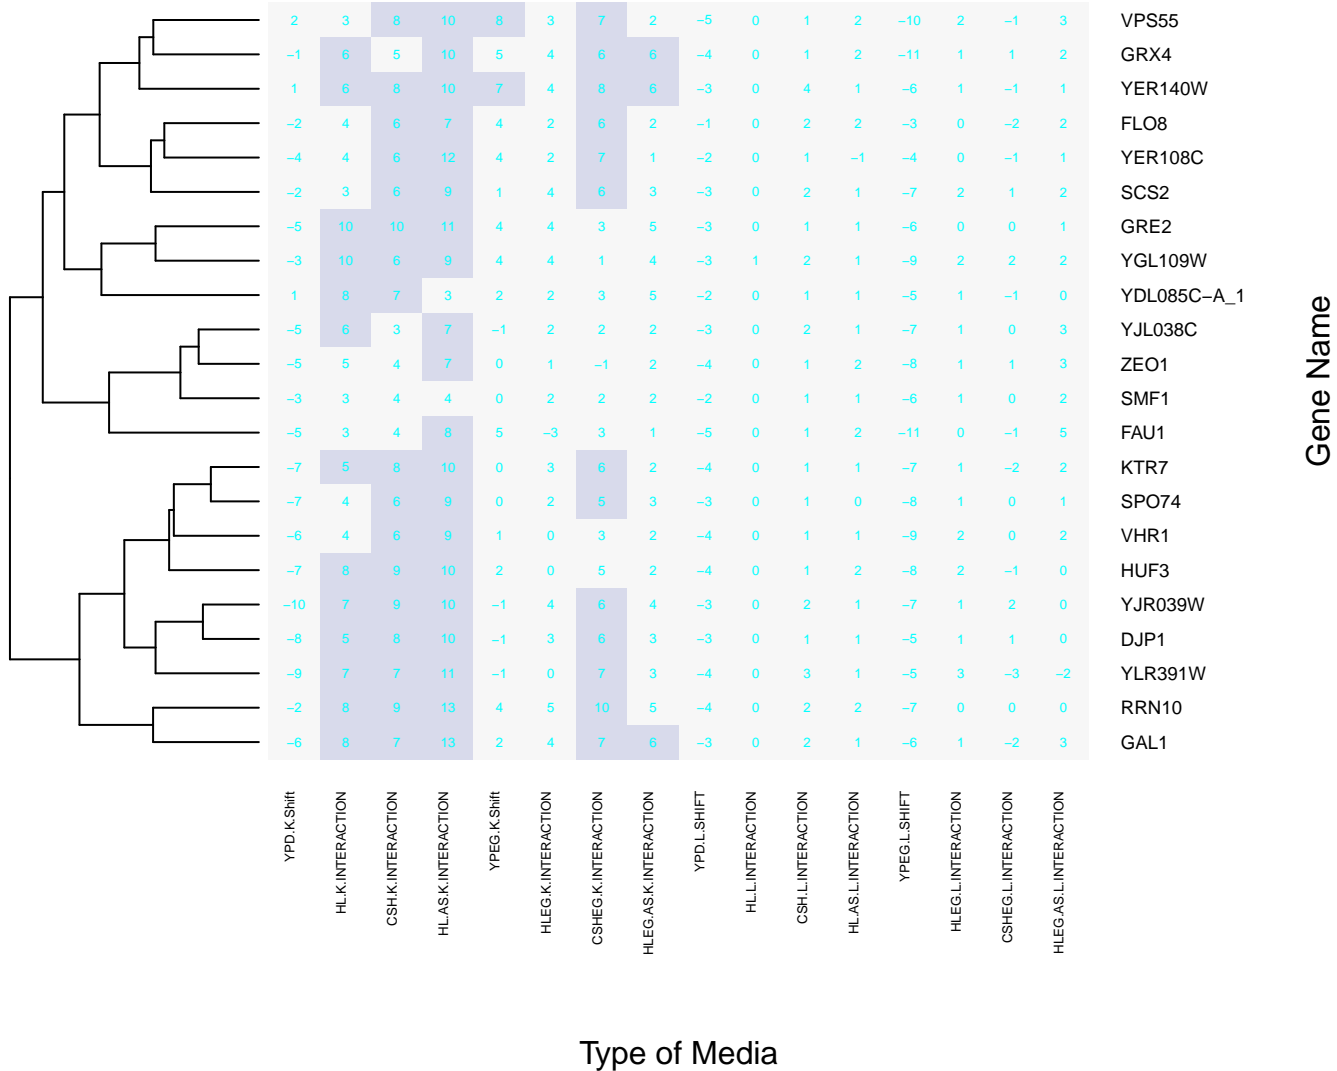

Color Key

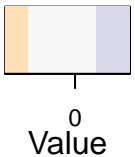

3-0.5.29-2

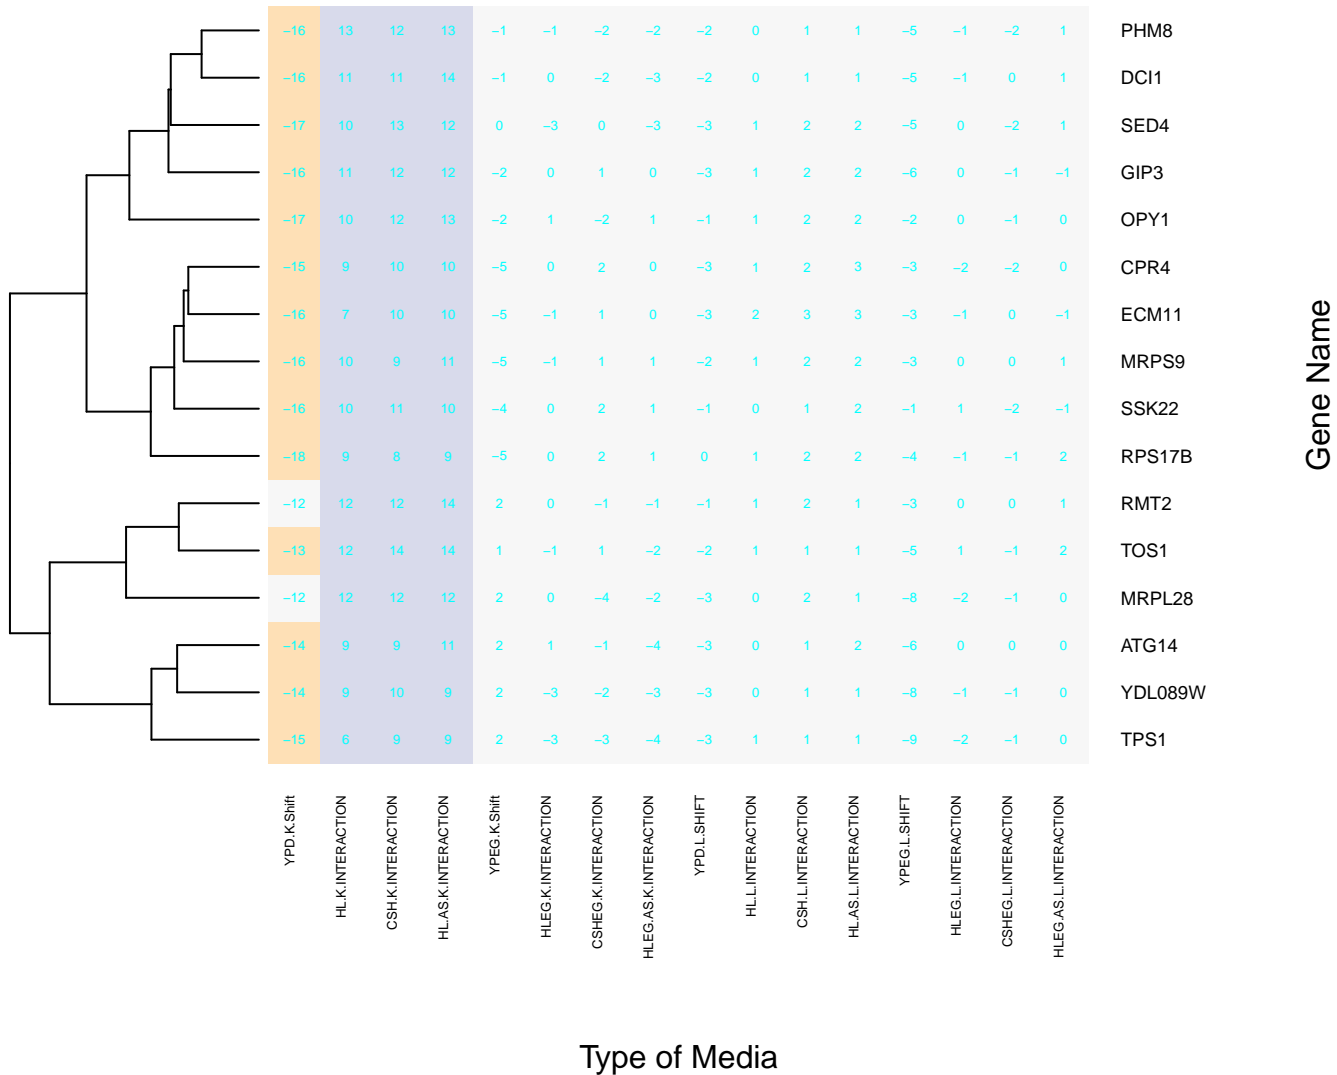

Color Key

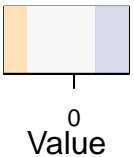

3-0.5.29-3

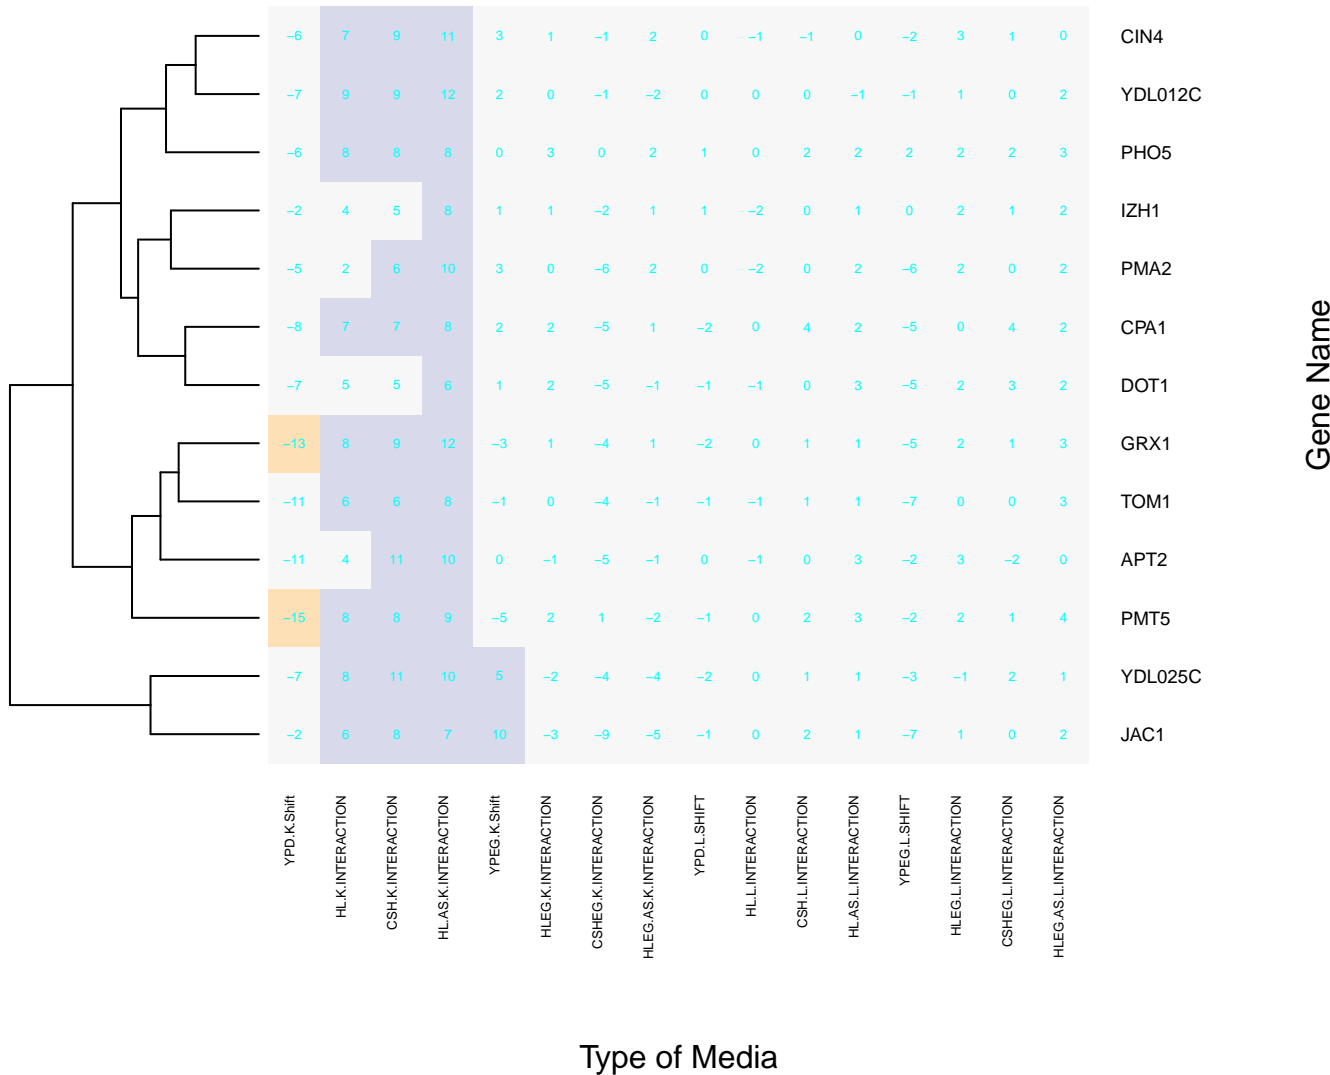

Color Key

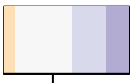

0  
Value

3-0.5.29-4

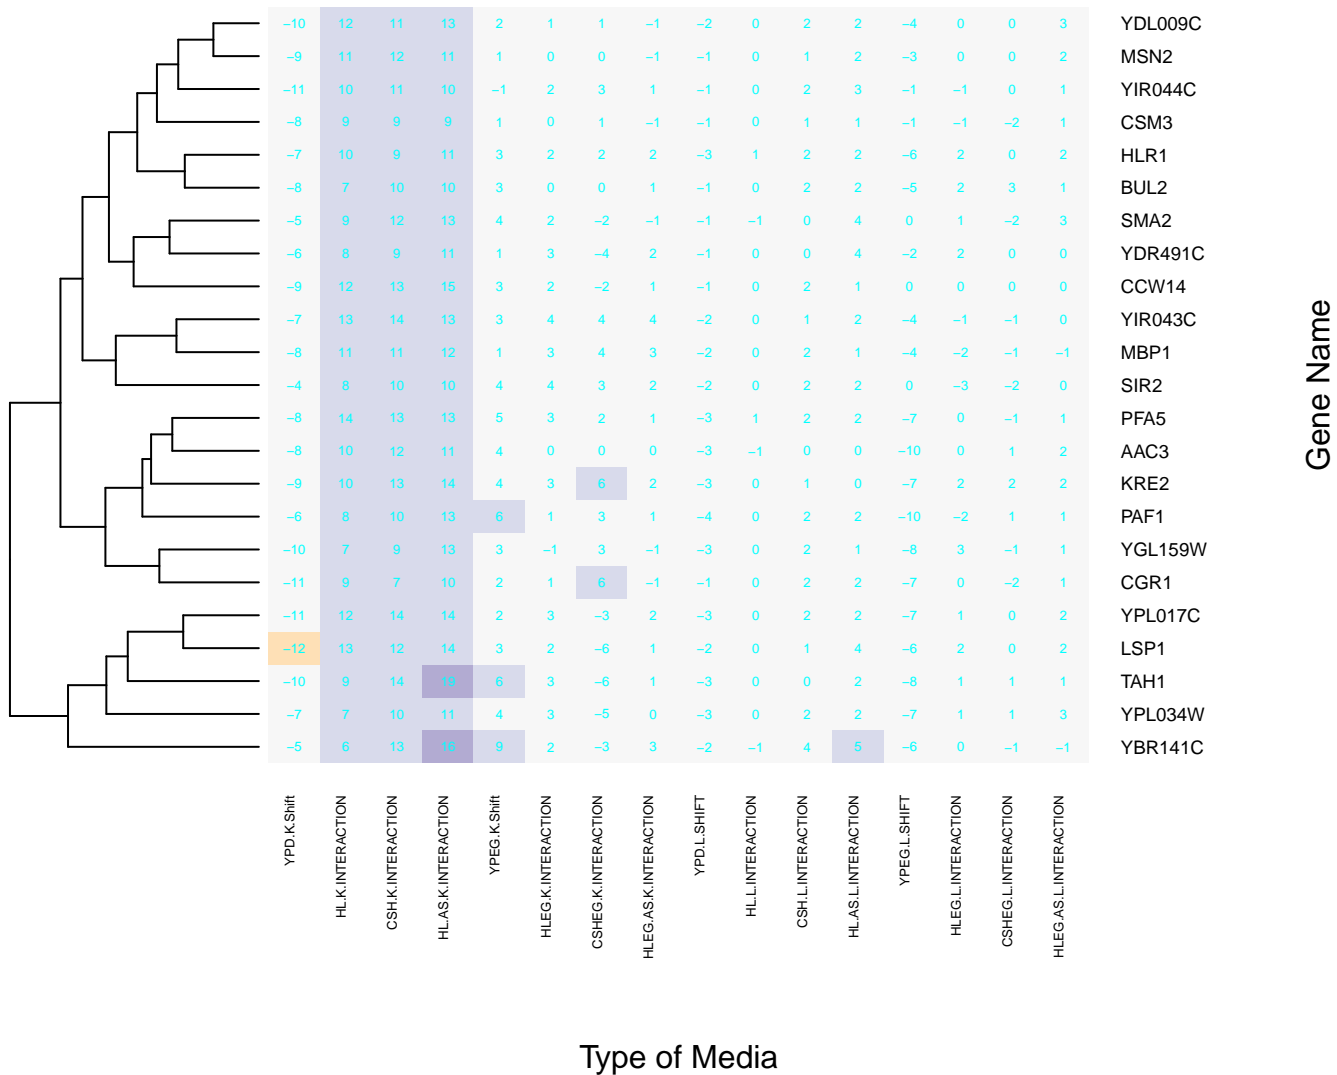

Color Key

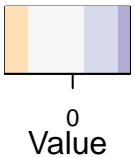

3-0.5.3-0

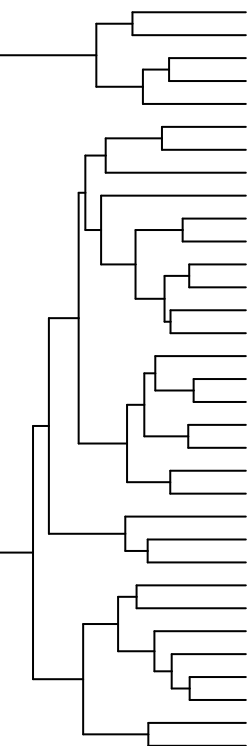

|     |     |    |     |     |    |    |    |    |    |    |    |    |     |     |     |
|-----|-----|----|-----|-----|----|----|----|----|----|----|----|----|-----|-----|-----|
| 12  | 1   | -2 | 1   | 5   | 10 | 14 | 9  | 1  | 0  | 0  | 0  | 8  | -4  | -7  | -6  |
| 4   | 4   | 5  | 5   | 4   | 6  | 12 | 6  | 3  | -2 | 1  | -1 | 13 | -6  | -12 | -7  |
| 3   | 5   | 1  | 2   | 2   | 8  | 6  | 12 | -1 | -2 | 3  | -1 | 7  | -12 | -11 | -10 |
| 8   | 1   | 1  | 2   | 4   | 8  | 10 | 8  | -2 | -1 | -1 | -1 | 5  | -9  | -11 | -11 |
| 5   | 1   | 2  | 5   | -1  | 11 | 4  | 9  | -2 | -2 | 1  | -1 | 0  | -6  | -5  | -6  |
| 2   | 2   | -1 | 4   | -6  | 12 | 5  | 12 | 3  | -2 | 1  | 0  | 12 | -7  | -6  | -7  |
| 1   | -1  | 0  | 1   | -10 | 13 | 4  | 12 | 2  | -3 | 0  | -1 | 6  | -5  | 1   | -6  |
| 7   | -5  | -1 | 0   | -6  | 4  | 15 | 14 | 3  | 3  | -1 | 1  | 13 | -5  | -2  | -6  |
| 3   | 3   | -2 | -11 | -2  | 7  | 9  | 5  | 2  | -2 | -1 | -1 | 7  | 1   | -8  | -6  |
| 0   | -4  | 0  | 0   | -4  | 7  | 9  | 7  | 1  | -1 | 0  | -1 | 6  | -5  | -6  | -7  |
| 6   | -8  | 1  | -2  | -4  | 4  | 9  | 8  | -1 | 0  | 0  | 1  | 6  | -5  | -10 | -7  |
| 0   | -4  | -4 | -1  | -3  | 7  | 8  | 3  | 1  | 1  | 1  | 1  | 5  | -6  | -6  | 1   |
| -2  | -5  | -4 | -3  | -2  | 5  | 4  | 4  | 1  | 0  | 0  | 1  | 4  | -2  | -3  | -1  |
| 0   | -7  | 2  | 1   | -3  | 1  | 4  | 2  | 0  | 0  | 1  | 1  | 7  | -5  | -8  | -3  |
| 3   | -8  | -5 | -3  | 1   | 3  | 2  | 3  | 0  | 0  | 1  | 0  | 5  | -5  | -3  | -4  |
| 3   | -2  | 1  | -1  | -8  | 14 | 14 | 12 | 2  | -1 | 0  | 0  | 9  | -6  | -9  | -5  |
| -2  | 1   | -3 | 0   | -6  | 9  | 10 | 9  | 1  | -1 | 0  | 0  | 4  | -3  | -4  | -4  |
| 1   | -4  | -1 | -3  | -7  | 7  | 9  | 9  | 1  | 0  | 0  | 1  | 7  | -4  | -4  | -2  |
| -1  | 1   | 1  | 1   | -9  | 6  | 14 | 10 | 1  | -1 | 0  | -1 | 9  | -3  | -10 | -9  |
| 0   | 0   | 2  | 1   | -7  | 3  | 10 | 8  | -1 | 0  | 0  | 1  | 7  | -6  | -10 | -8  |
| -4  | -5  | -1 | -3  | -11 | 7  | 10 | 7  | 2  | 0  | 0  | 0  | 11 | -6  | -5  | -3  |
| -8  | -7  | 1  | -5  | -12 | 8  | 11 | 6  | -1 | -1 | 0  | 0  | 5  | -5  | -10 | -6  |
| 4   | -15 | 0  | 1   | -5  | -3 | 12 | 12 | -1 | 1  | 0  | 2  | 9  | -3  | -11 | -7  |
| 0   | -17 | 1  | 1   | -10 | 9  | 6  | 8  | 3  | 1  | -1 | 0  | 9  | -4  | -8  | -6  |
| 3   | -18 | -3 | -6  | -14 | 6  | 10 | 13 | -1 | -1 | -1 | -1 | 5  | -5  | -7  | -6  |
| -10 | 4   | 6  | -1  | -10 | 8  | 7  | 6  | 0  | -1 | 0  | 1  | 7  | -3  | -4  | -3  |
| -5  | 1   | 0  | 5   | -8  | 4  | -1 | 4  | 0  | -1 | 2  | 0  | 4  | -1  | -4  | -3  |
| -5  | -2  | 4  | -10 | -3  | 6  | 2  | 2  | -1 | -2 | -1 | 0  | 1  | -6  | -3  | -5  |
| -6  | -2  | -1 | 0   | -5  | 5  | 4  | 6  | 0  | -2 | 1  | 0  | 1  | -5  | 1   | -5  |
| -1  | -1  | 0  | -1  | 0   | 5  | 6  | 6  | -1 | -1 | 0  | 0  | 1  | -6  | -5  | -5  |
| -1  | -3  | 0  | -6  | -3  | 7  | 4  | 5  | 2  | -2 | -1 | 0  | 0  | -5  | -4  | -5  |
| -8  | 1   | 2  | -1  | -6  | 5  | 6  | 3  | -2 | 0  | 0  | 1  | 3  | -9  | -9  | -8  |
| -5  | -3  | 1  | 0   | -5  | 4  | -4 | 5  | -1 | -2 | 1  | -1 | 8  | -13 | -12 | -12 |

- YOR059C
- LDB19
- ACS2
- TLG2
- ERG8
- CSL4
- PTK1
- MET18
- GAS3
- GLO4
- YKR041W
- PHM7
- SPR1
- NIS1
- YOL083W
- RAD17
- DAL82
- ATG19
- YOR356W
- YML122C
- PEX6
- NCL1
- TEC1
- SMY2
- POT1
- FUI1
- NHX1
- SRN2
- SLA1
- OPI10
- YNL235C
- ARL3
- VPS21

Gene Name

- YPD.K.Shift
- HLK.INTERACTION
- CSH.K.INTERACTION
- HLAS.K.INTERACTION
- YPEG.K.Shift
- HLEG.K.INTERACTION
- CSHEG.K.INTERACTION
- HLEG.AS.K.INTERACTION
- YPD.L.Shift
- HLL.INTERACTION
- CSH.L.INTERACTION
- HLAS.L.INTERACTION
- YPEG.L.Shift
- HLEG.L.INTERACTION
- CSHEG.L.INTERACTION
- HLEG.AS.L.INTERACTION

Type of Media

Color Key

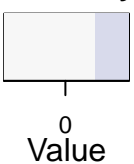

0  
Value

3-0.5.3-1

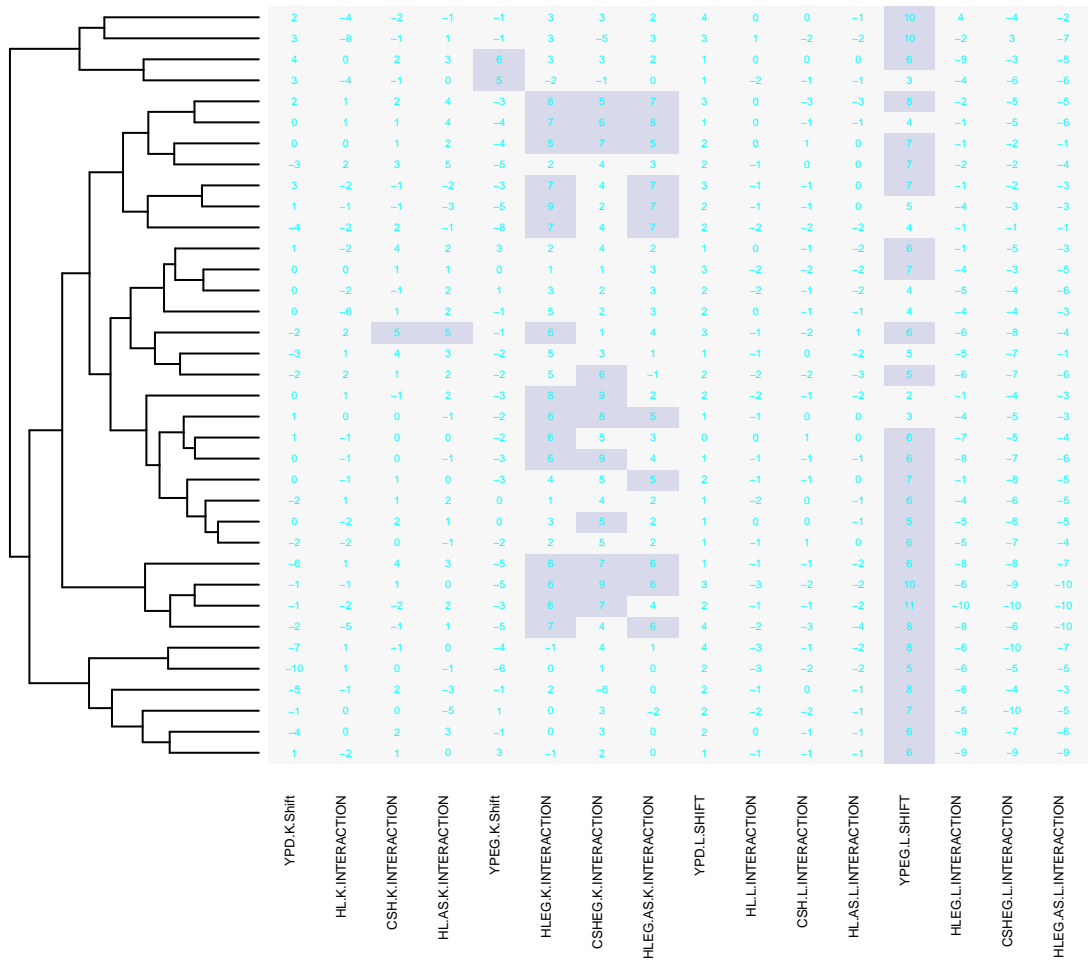

Gene Name

Type of Media

Color Key

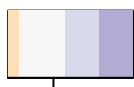

0  
Value

3-0.5.4-0

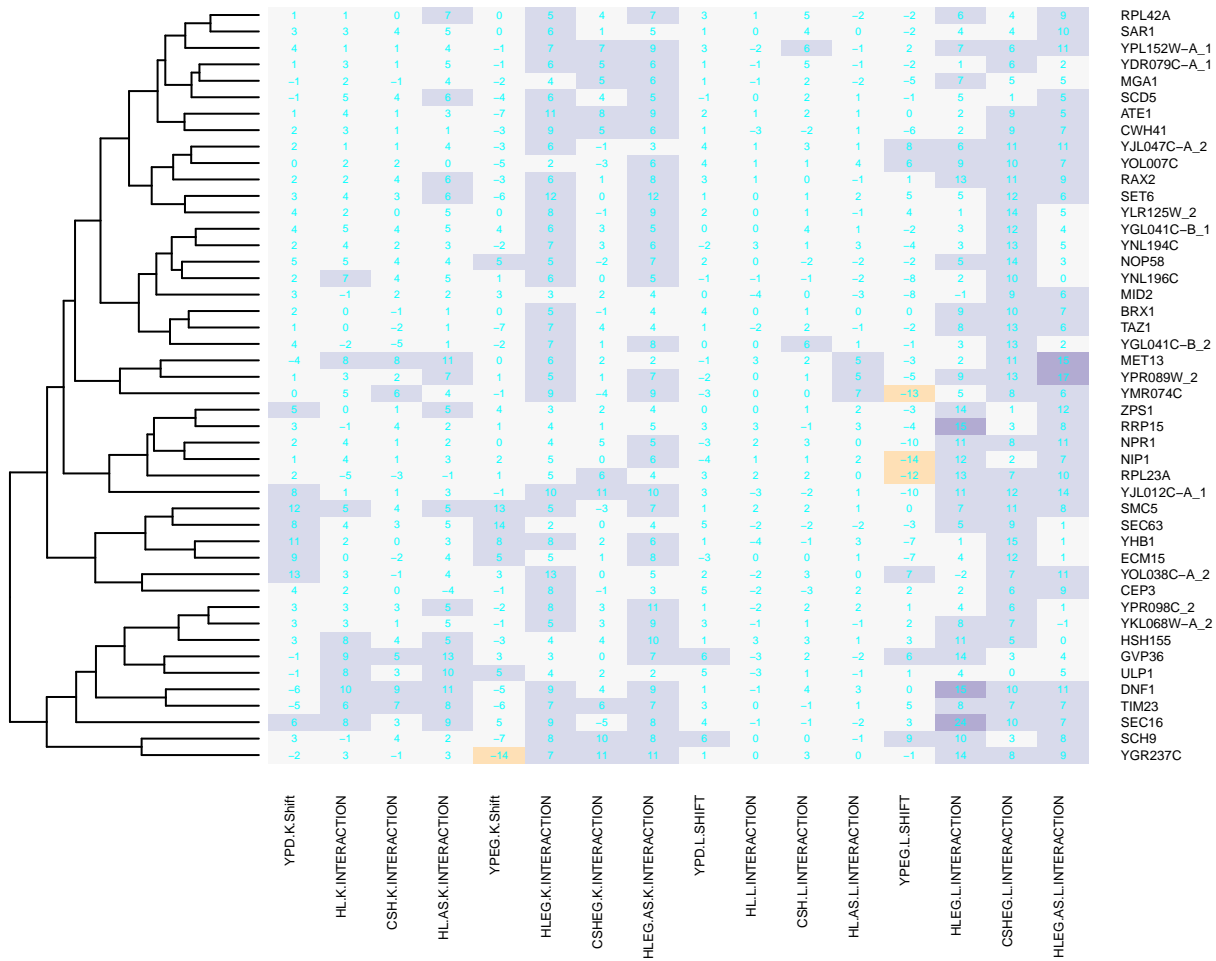

Gene Name

Type of Media

Color Key

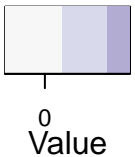

3-0.5.4-1

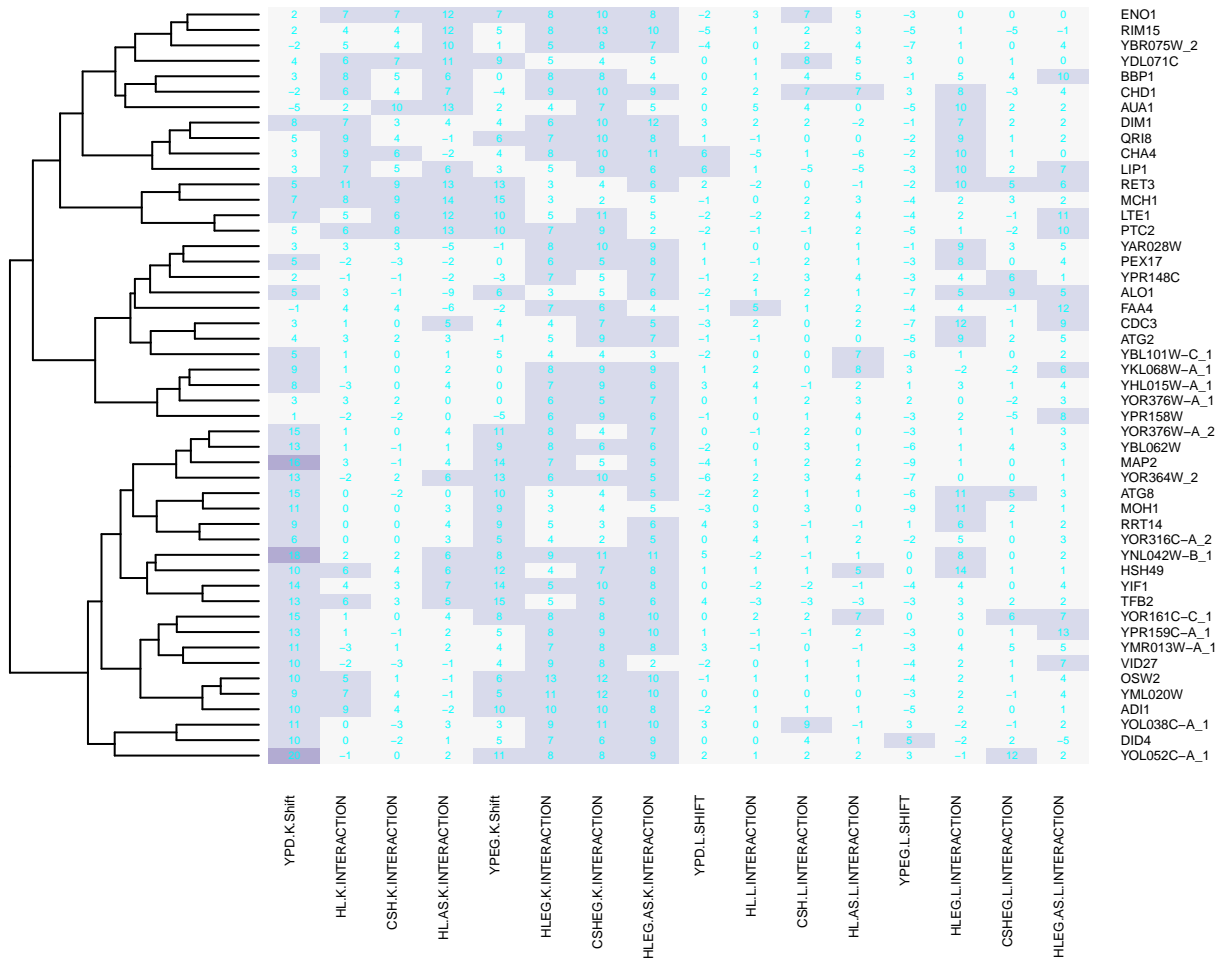

Gene Name

Type of Media

Color Key

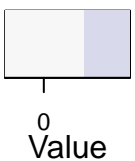

3-0.5.5-0

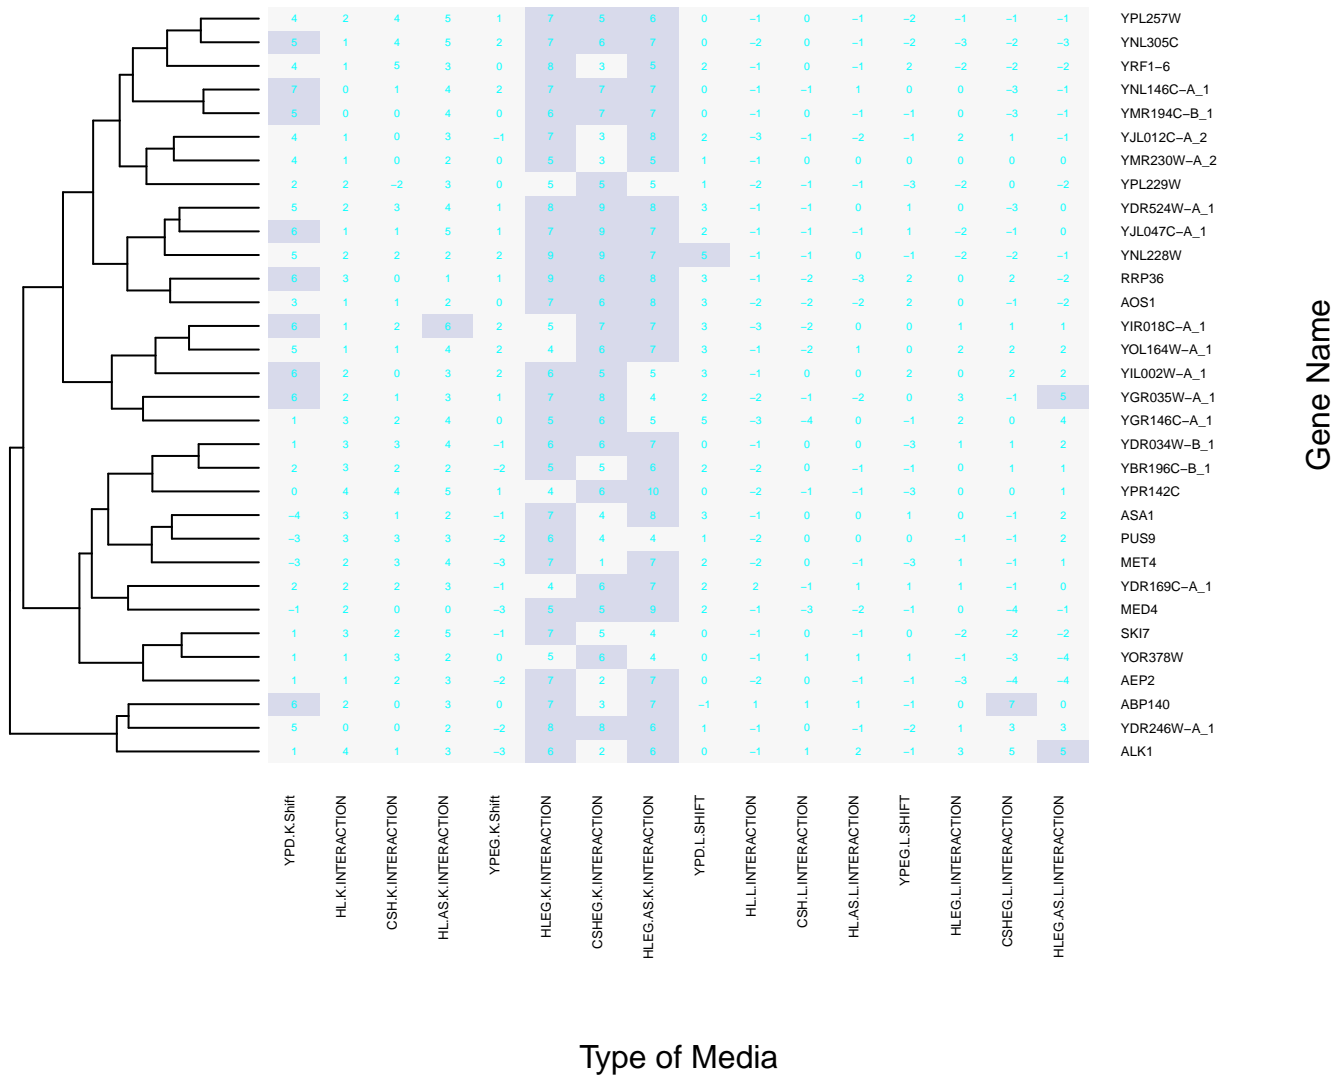

Color Key

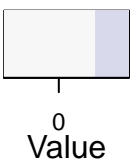

3-0.5.5-1

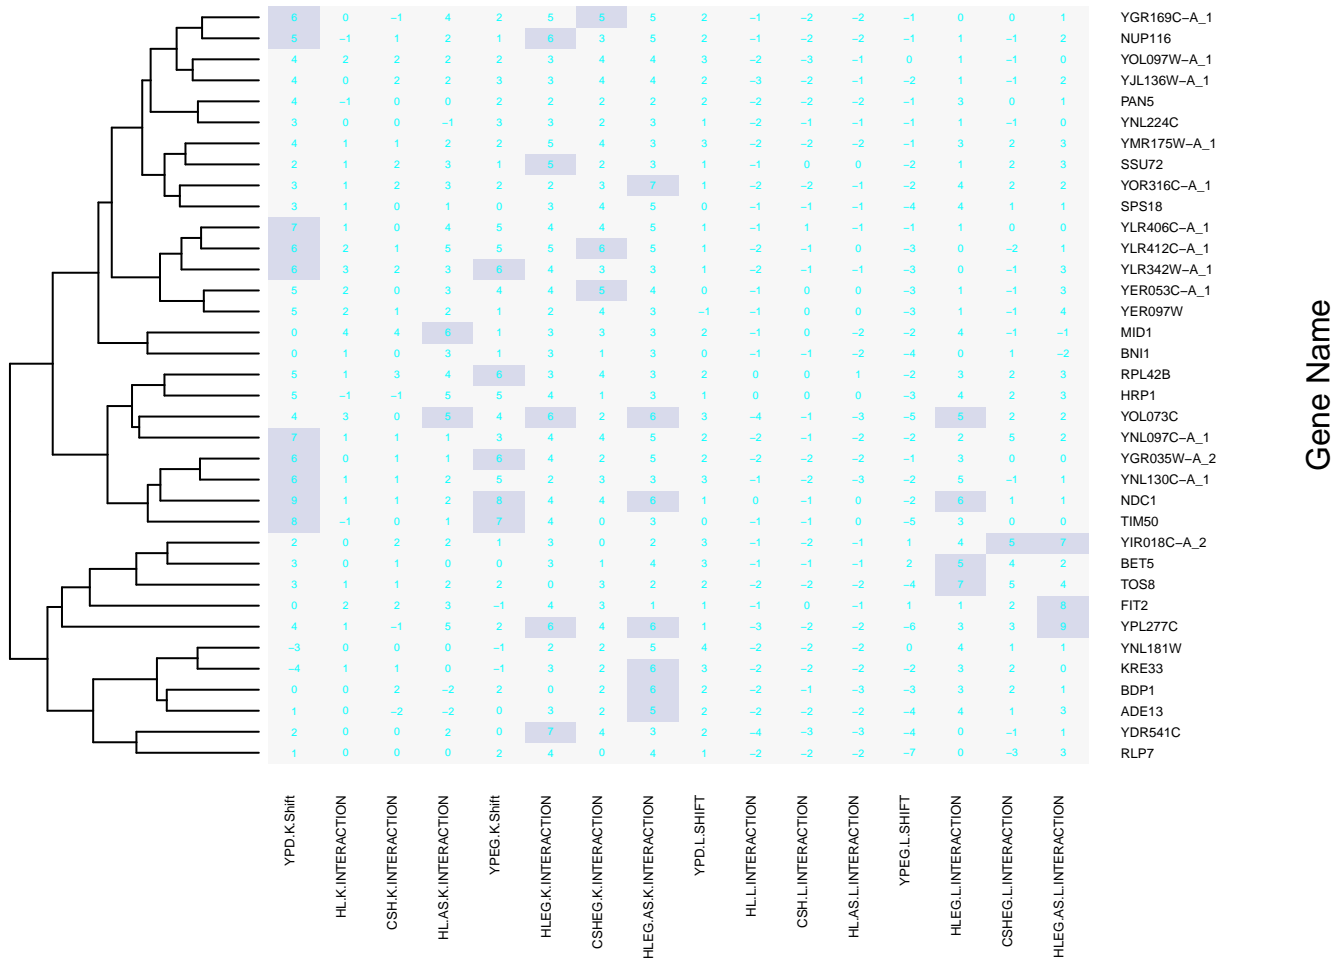

Color Key

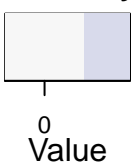

3-0.5.5-2

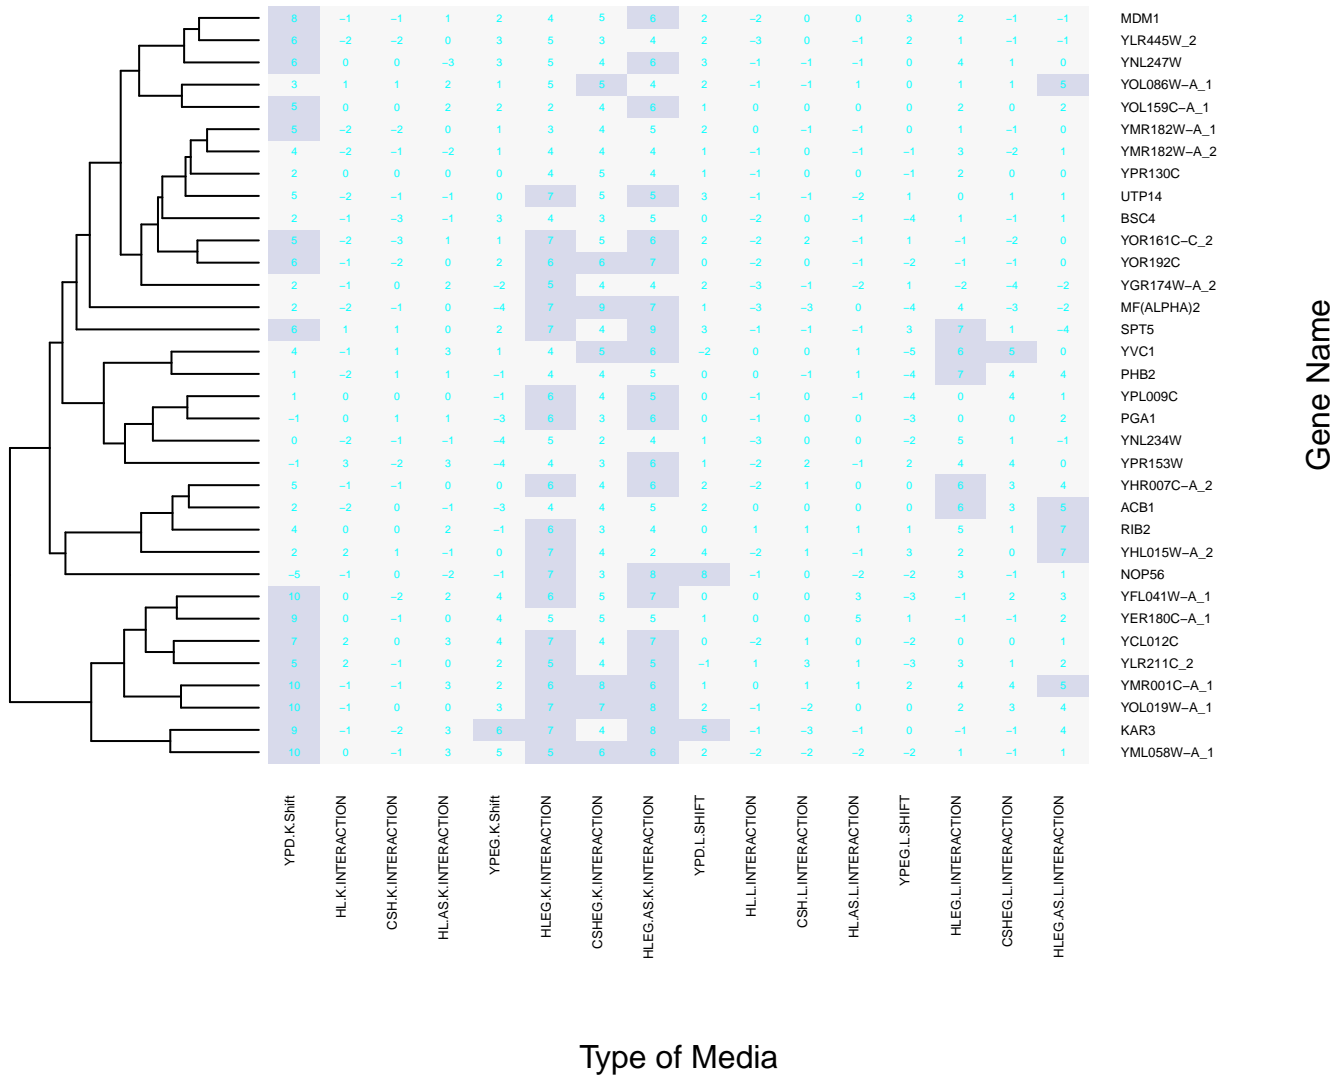

0

**3-0.5.6-0**

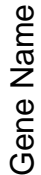

Color Key

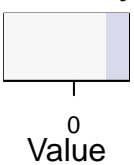

3-0.5.6-1

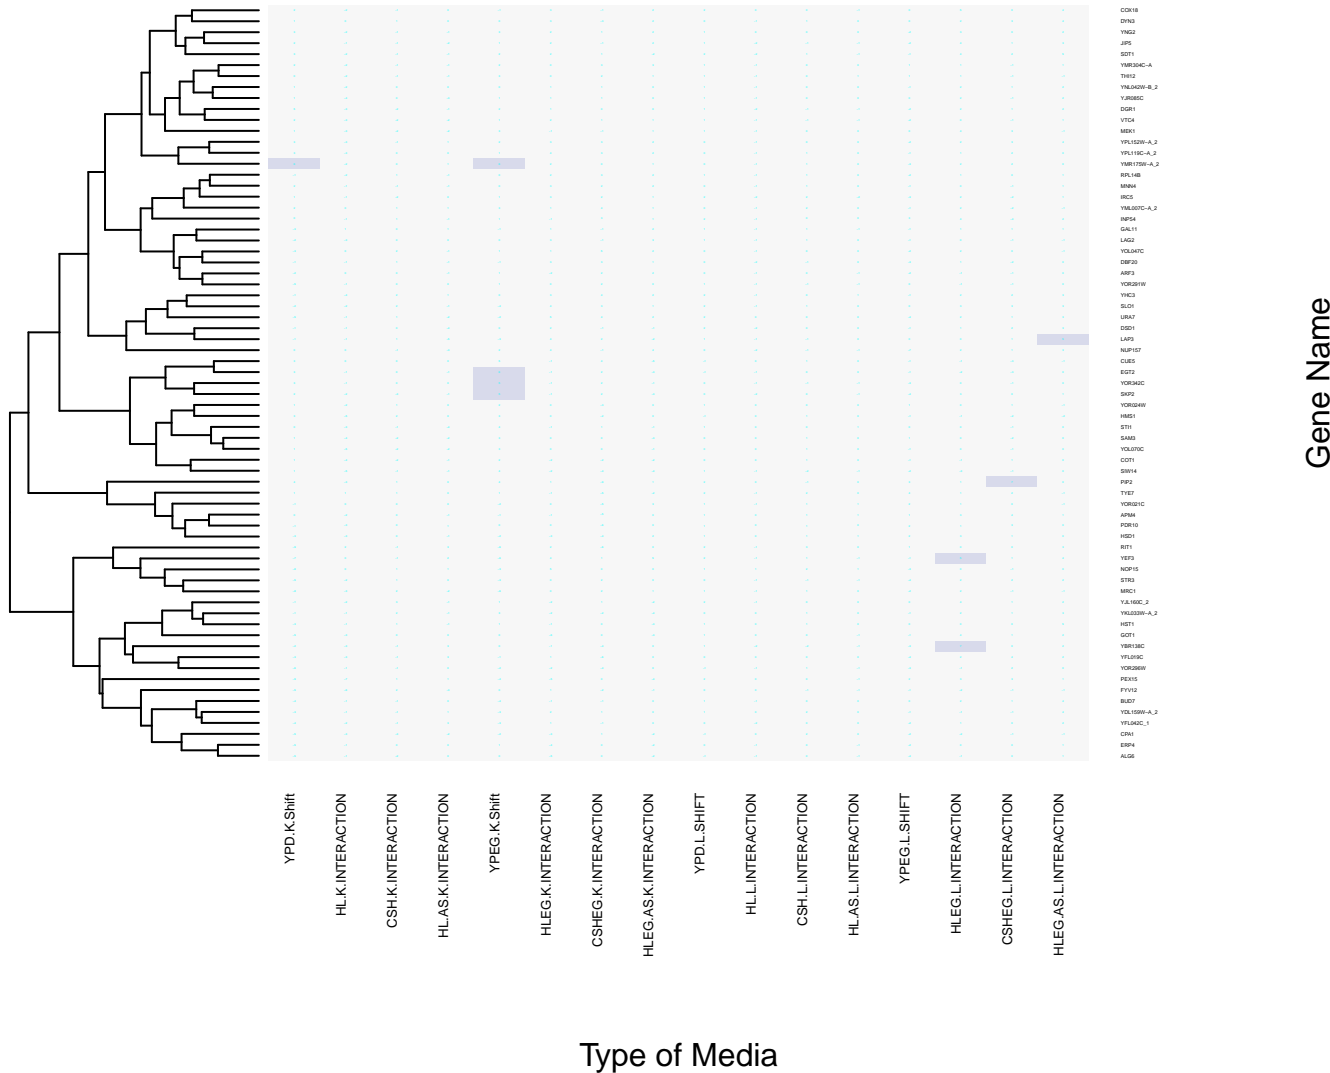

Color Key

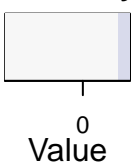

3-0.5.6-2

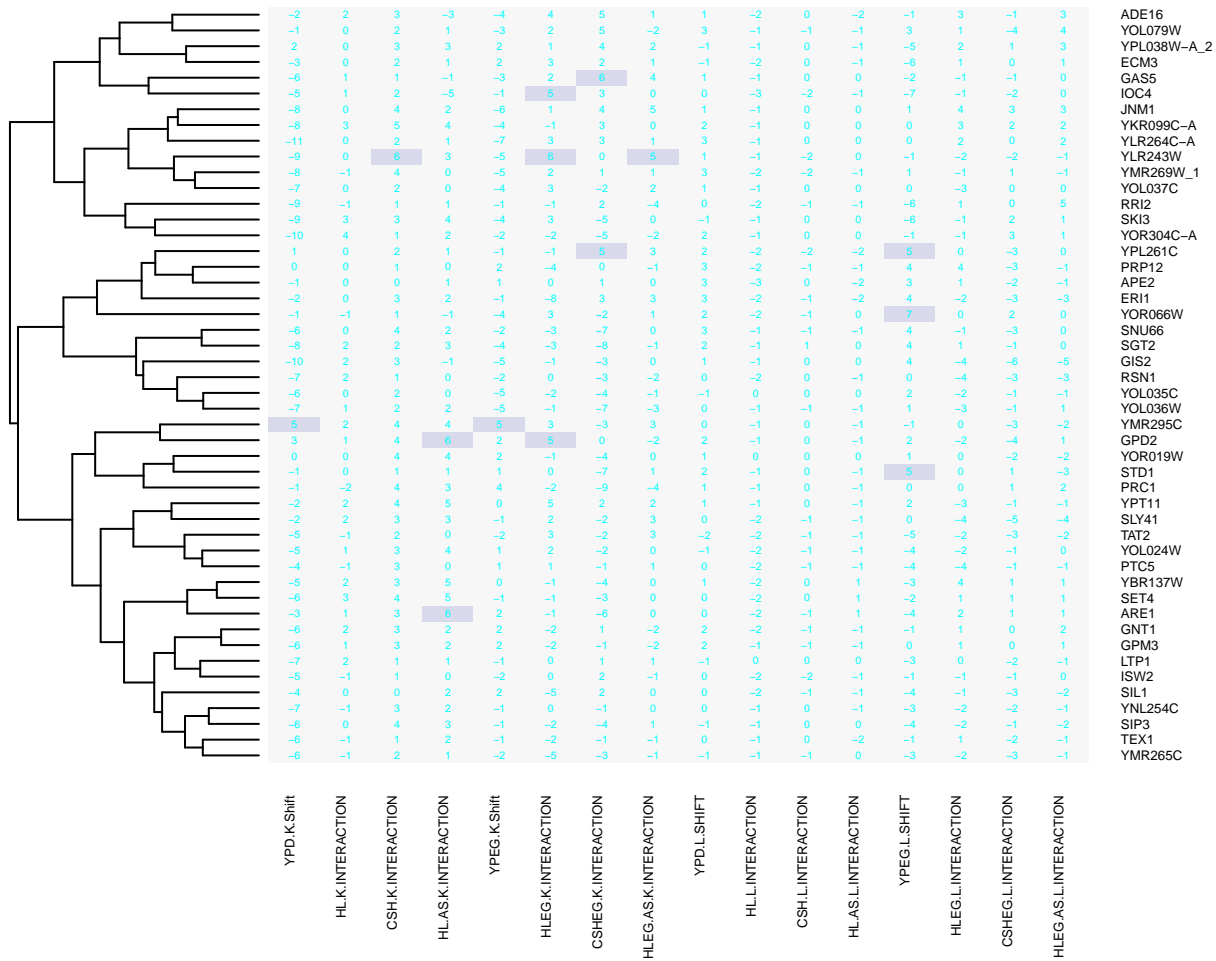

Gene Name

Type of Media

0

**3-0.5.7-0**

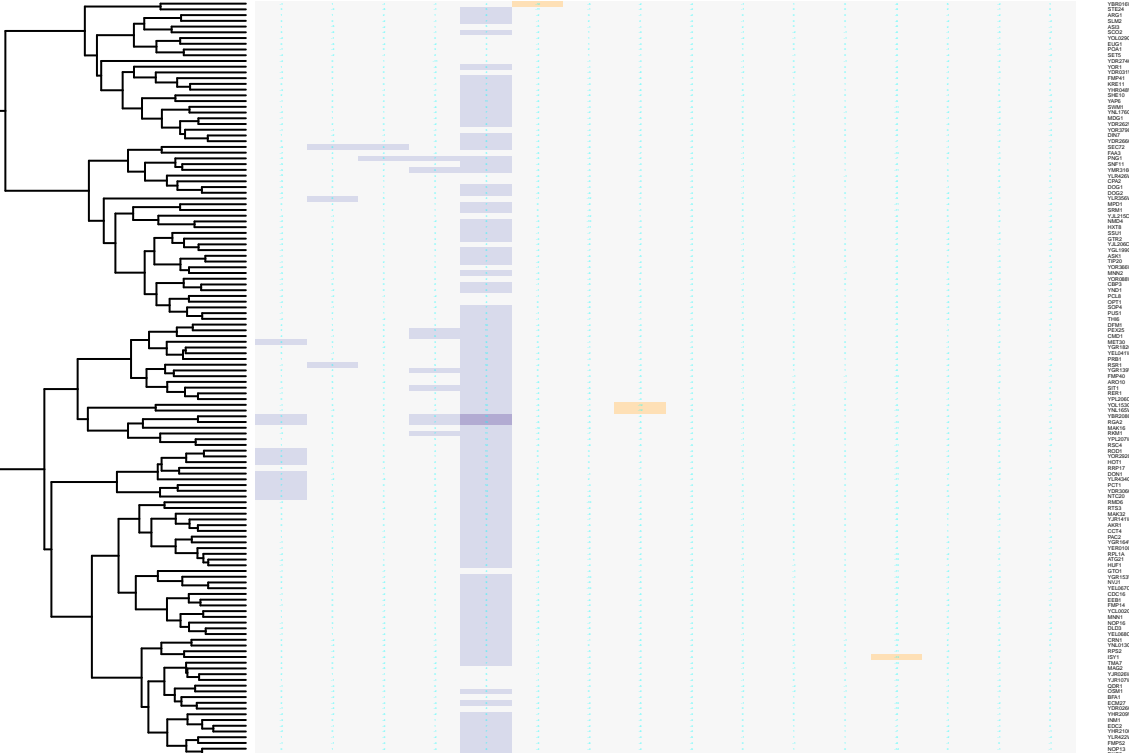

Gene Name

## Type of Media

Color Key

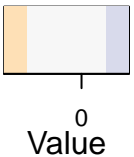

3-0.5.7-1

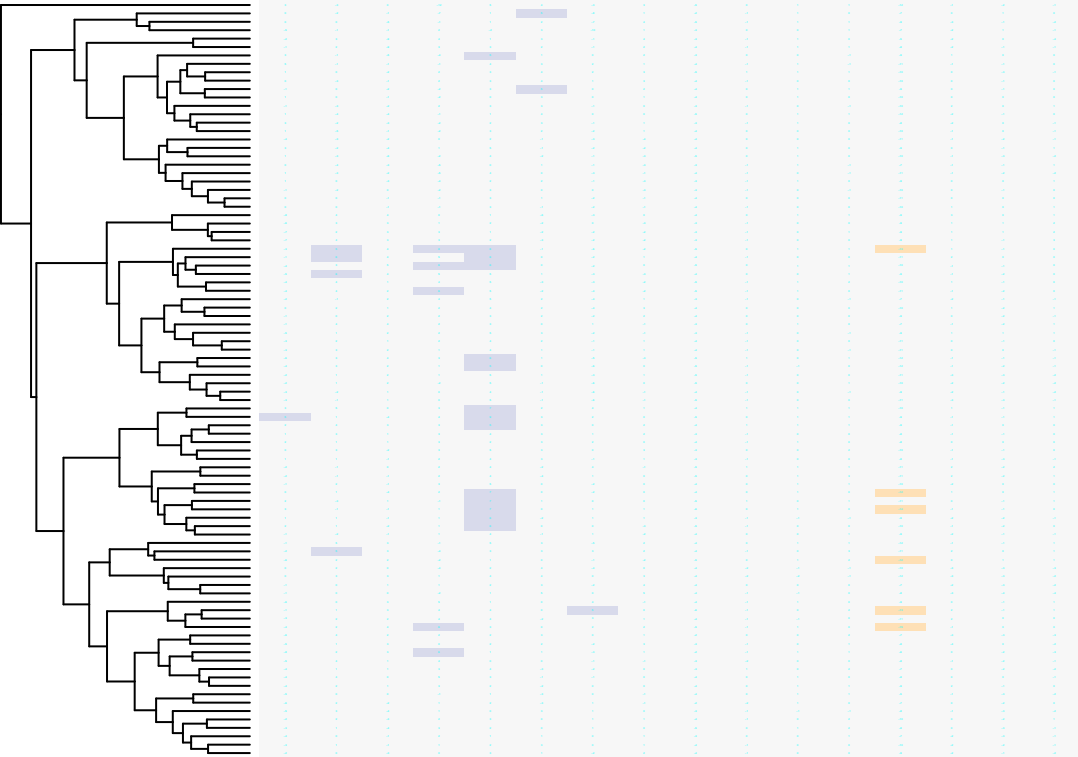

YPD  
YLG8W  
YLR18DC  
YAP2  
YUG5  
YLR16W  
IST1  
YAL05C-B\_2  
ATG13  
GDI1  
FOR12  
YMR5C-A\_2  
YPR14C  
HIS7  
HBN1  
TOP1  
YMR52W  
MEO1  
UTR1  
SPO2  
YLR18C  
YGL17W-A\_2  
SWH1  
YAL05C-A\_2  
YLR16W-A\_2  
YAG2W  
HIS2  
SRF7  
LEU2  
HBE1  
YAL05W-A\_1  
YAL04W-A\_1  
FUS3  
YMR37W  
YOL18C  
YMR24C  
PDI1  
YAL27C  
YLR18E1-A\_1  
YPR172W  
HSP2  
CHC27  
DAN1  
BLD1  
YAL05C  
YLR177W  
TAL1  
YLR18W  
YOL18C  
ACH1  
YMR5C-A\_1  
YMR5C-A\_1  
AMB1  
YMR5W-A\_1  
YMR5W-A\_2  
YOL16W  
NDJ1  
SPY1  
LEE1  
RIL2  
FOR17  
YMR52W  
DNA1  
YLR16W  
DPM  
ACT2  
HSP2  
YMR14C  
YLR18C  
BGR1  
YMR53C  
YAL04W  
YOL16W  
YOL10W  
YPR12  
YPR162W  
STH1  
CPS1  
TRG1  
DNA1  
RIL2  
DPM  
DPM  
YMR5W  
YLR16W  
YGL16W  
YMR52W  
HIS2  
YLR16W  
MEO2  
DPM

Gene Name

YPD.K.Shift  
HLK.INTERACTION  
CSH.K.INTERACTION  
HLAS.K.INTERACTION  
YPEG.K.Shift  
HLEG.K.INTERACTION  
CSHEG.K.INTERACTION  
HLEG.AS.K.INTERACTION  
YPD.L.Shift  
HLL.INTERACTION  
CSH.L.INTERACTION  
HLAS.L.INTERACTION  
YPEG.L.Shift  
HLEG.L.INTERACTION  
CSHEG.L.INTERACTION  
HLEG.AS.L.INTERACTION

Type of Media

Color Key

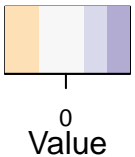

3-0.5.8-0

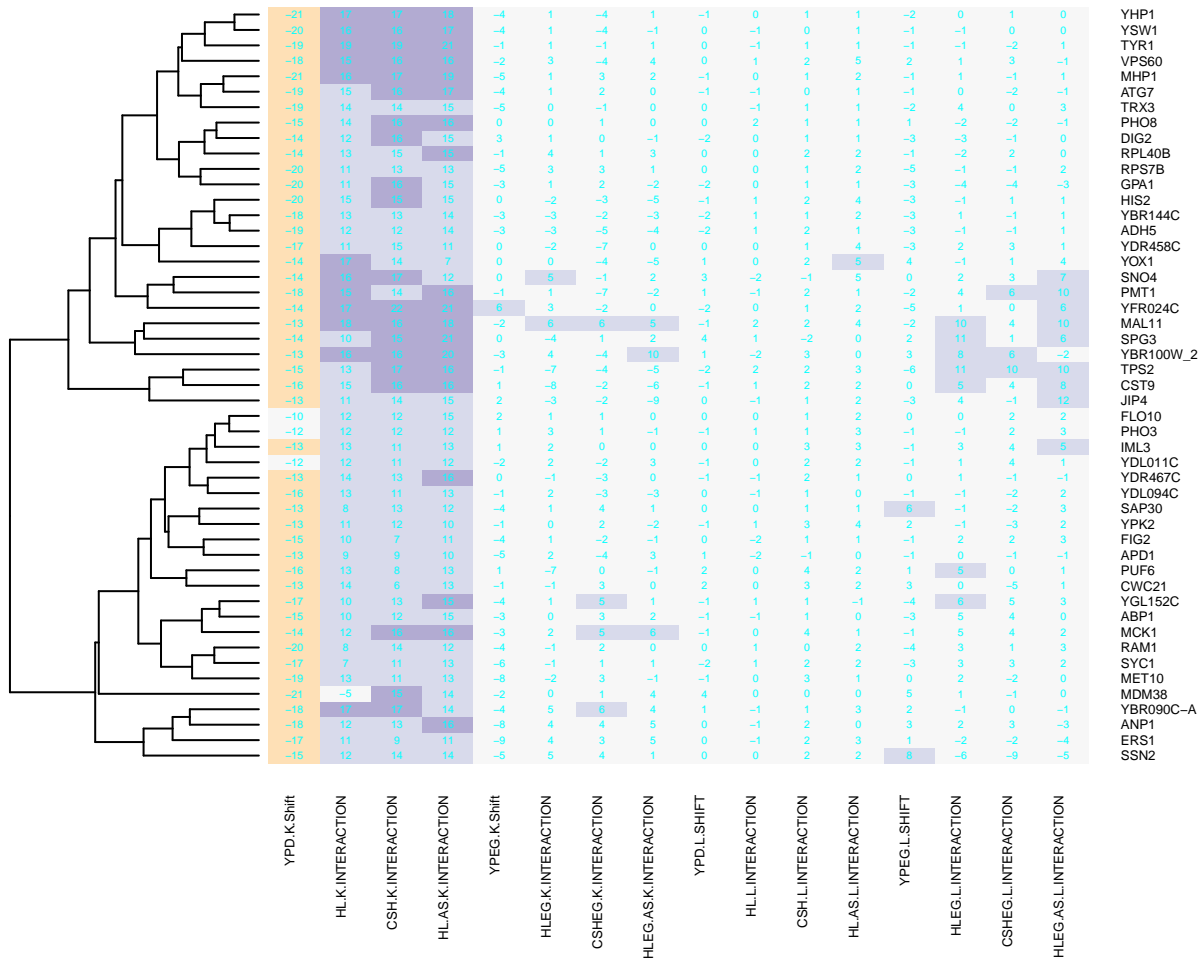

Gene Name

Type of Media

Color Key

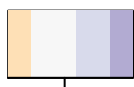

0  
Value

3-0.5.8-1

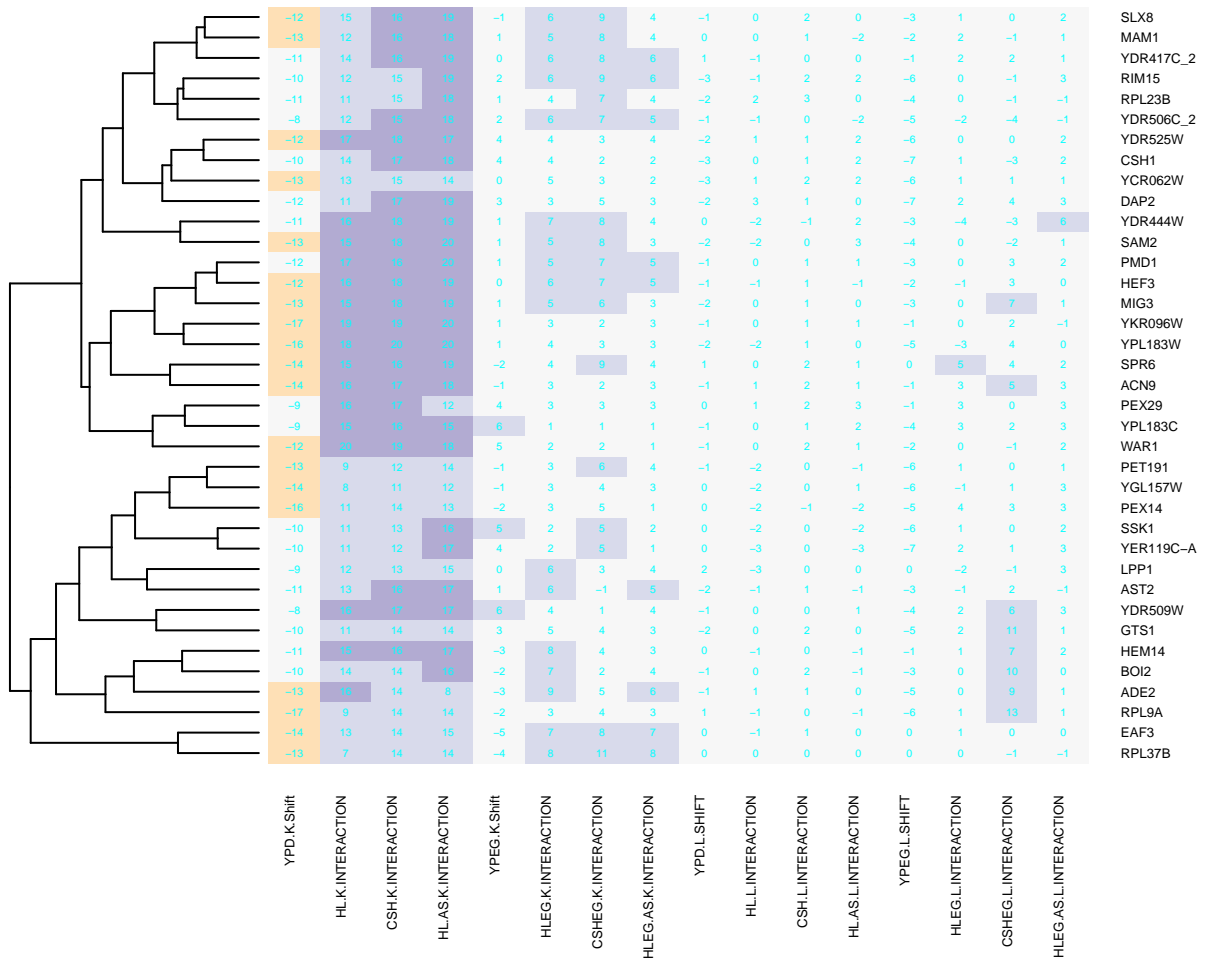

Gene Name

Type of Media

Color Key

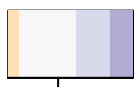

0  
Value

3-0.5.8-2

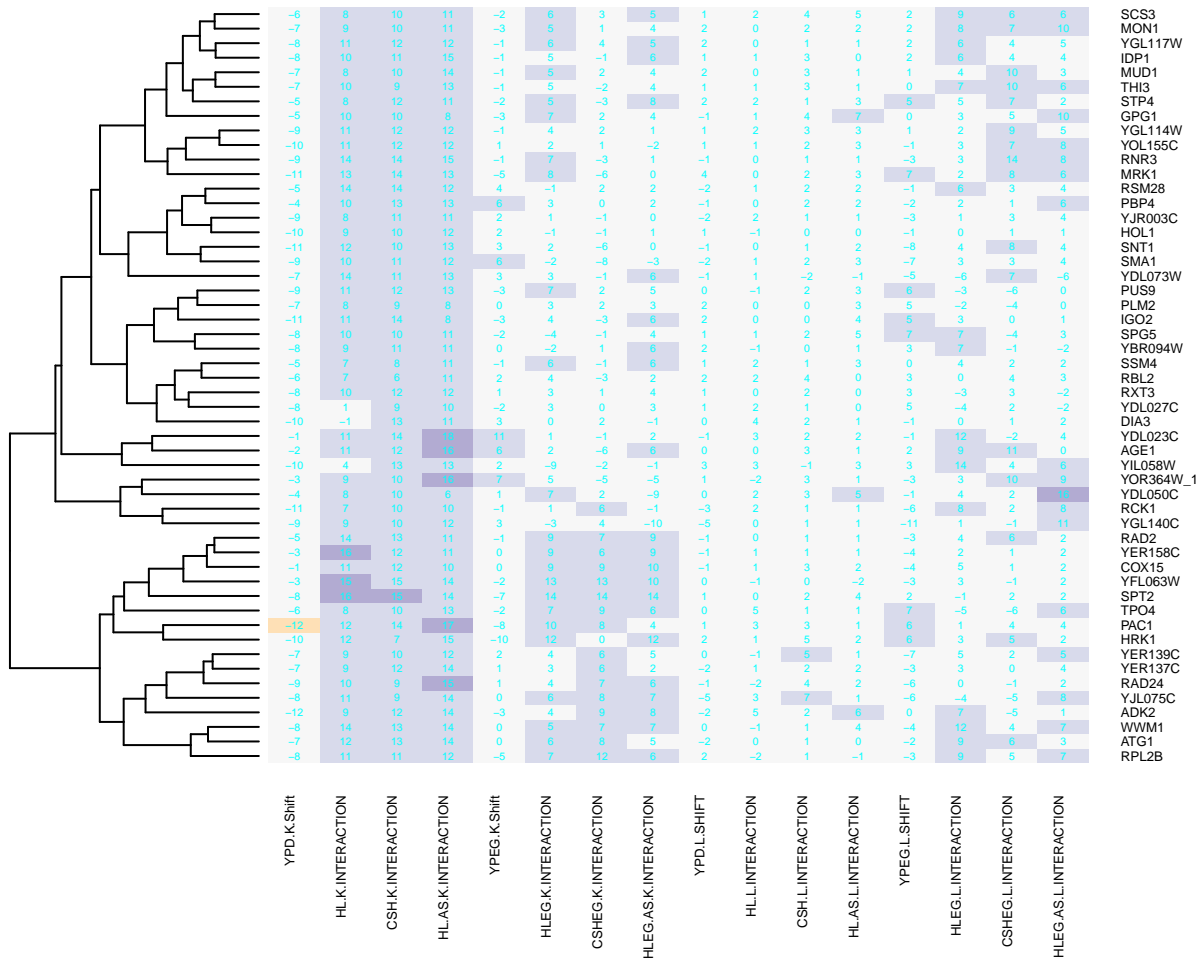

Gene Name

Type of Media

Color Key

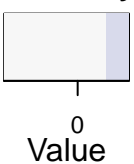

3-0.5.9-0

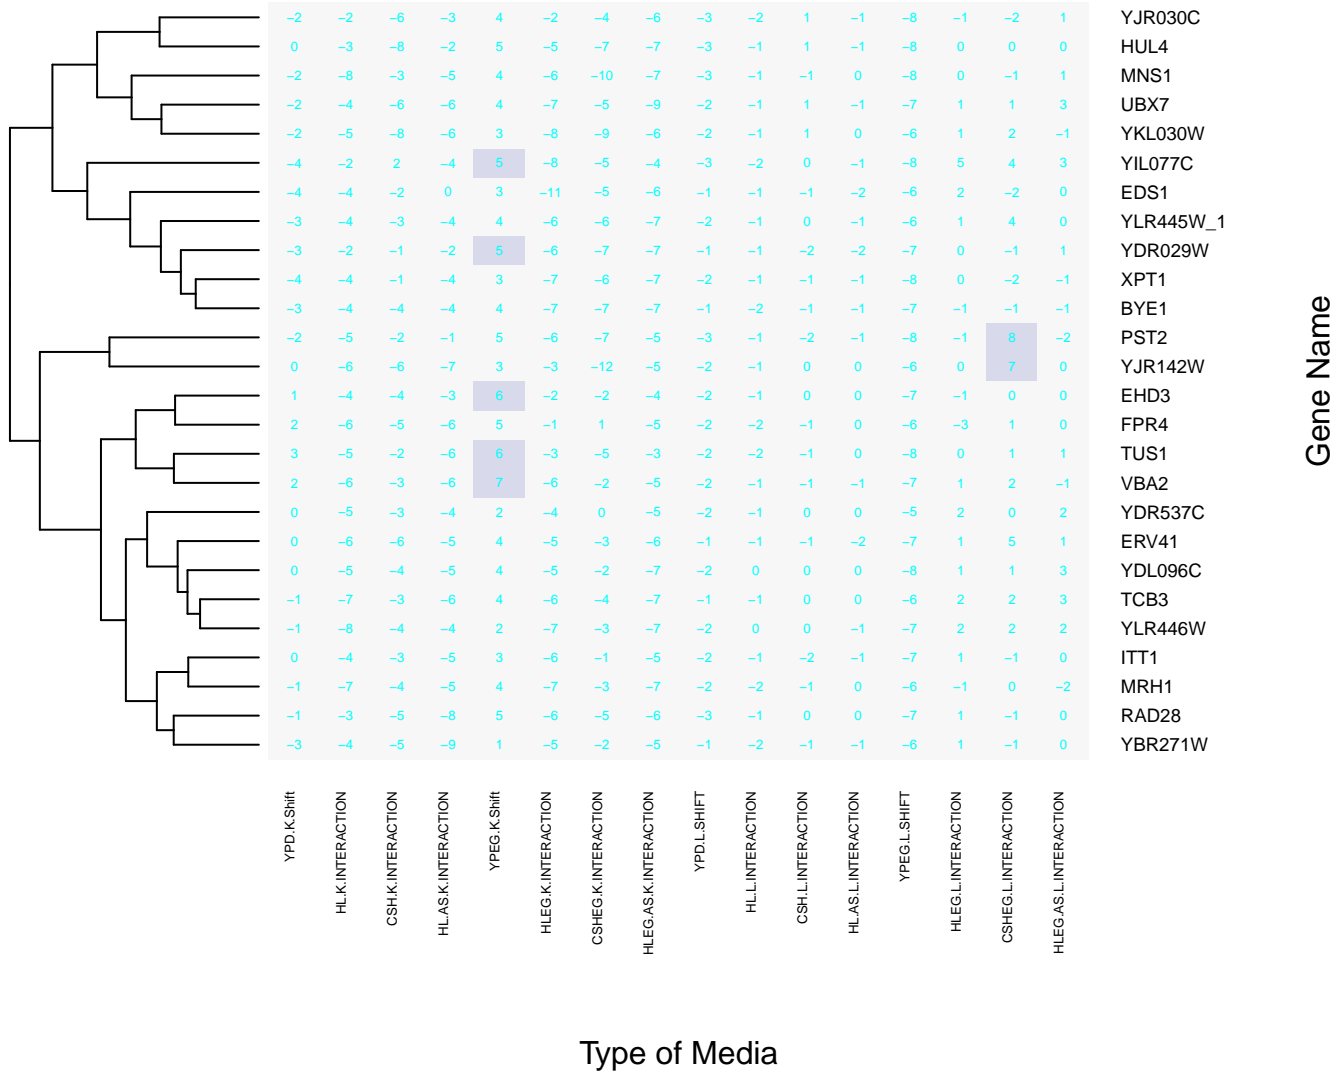

Color Key

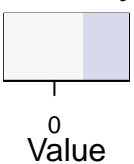

3-0.5.9-1

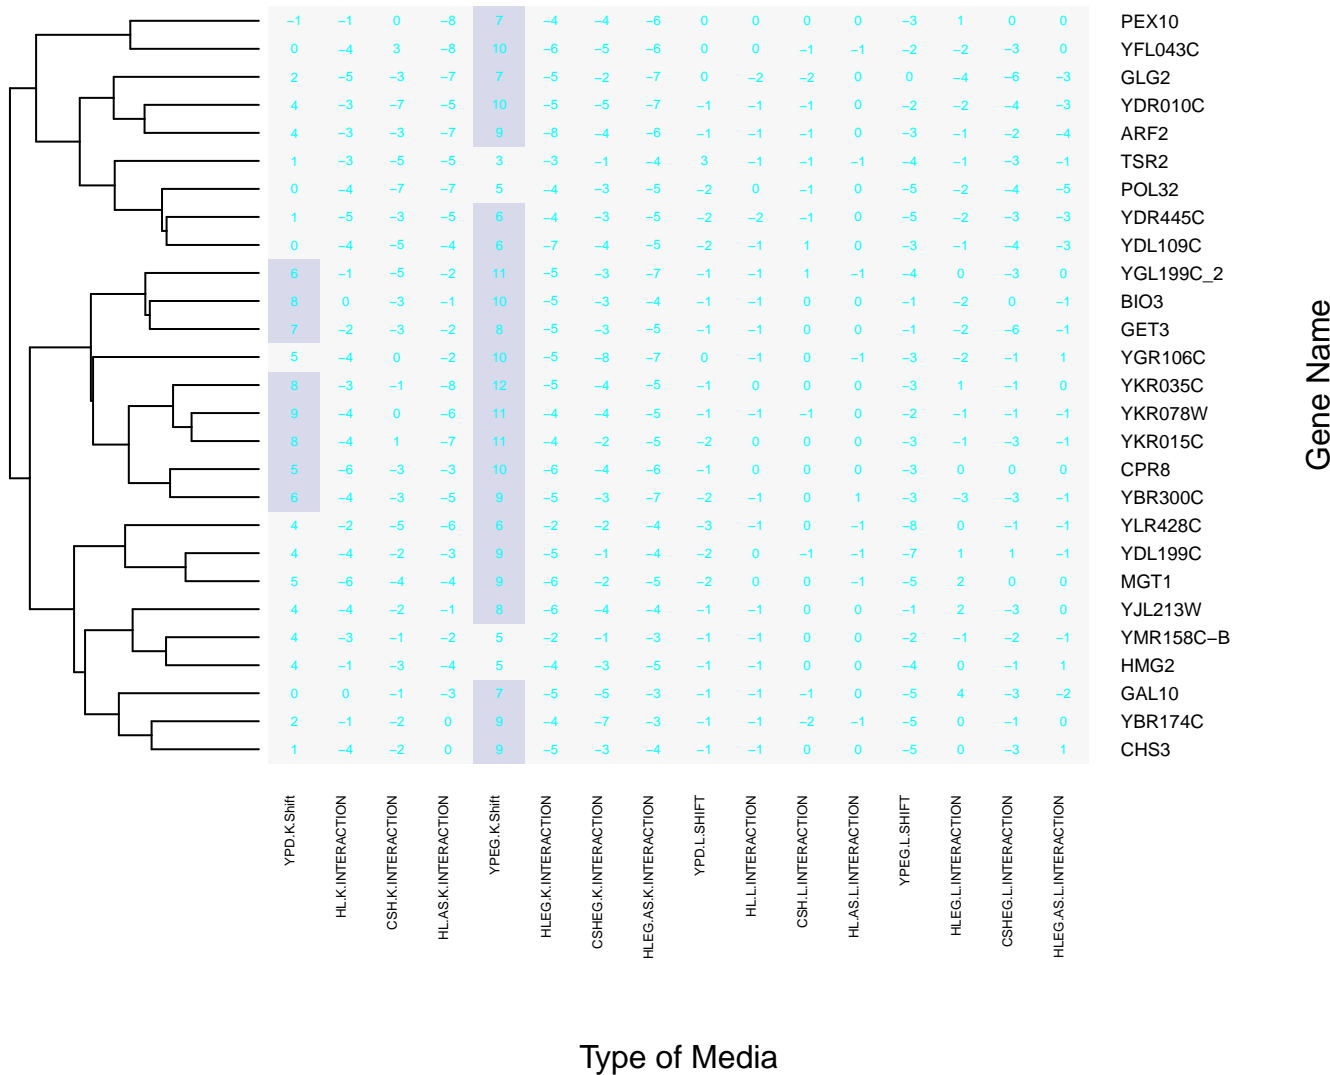

Color Key

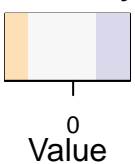

3-0.5.9-2

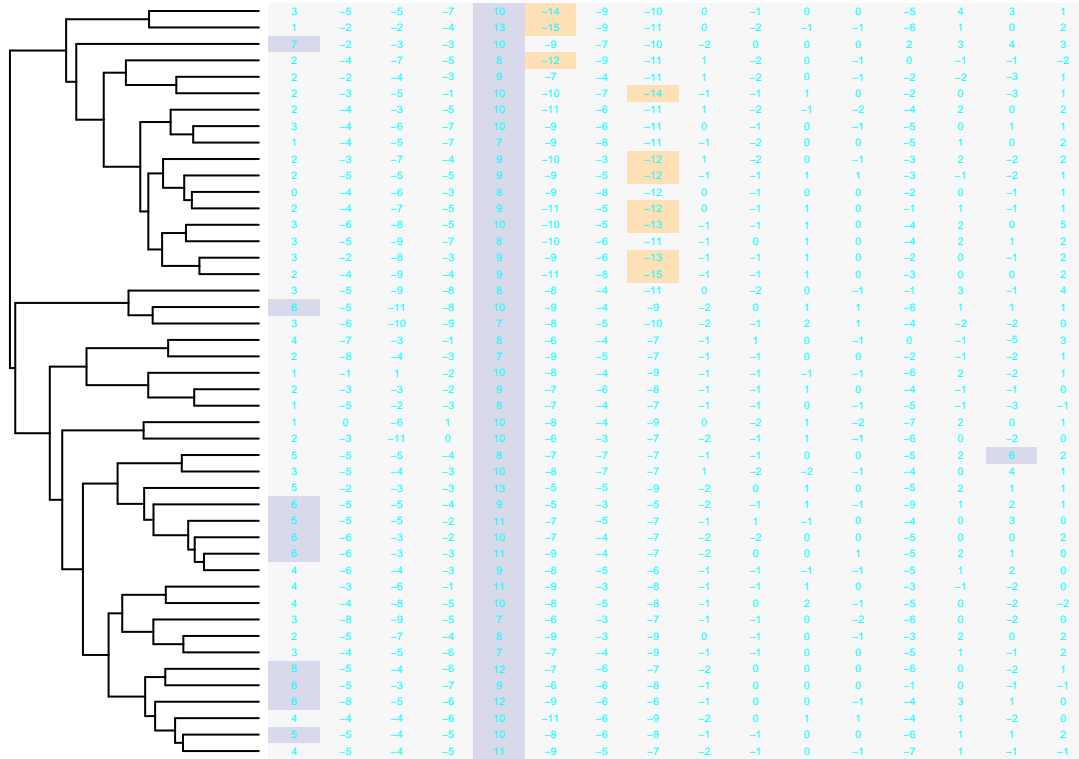

Gene Name

Type of Media

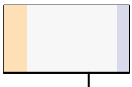

○

**3-0.5.9-3**



Color Key



4-0.1.1.0-0

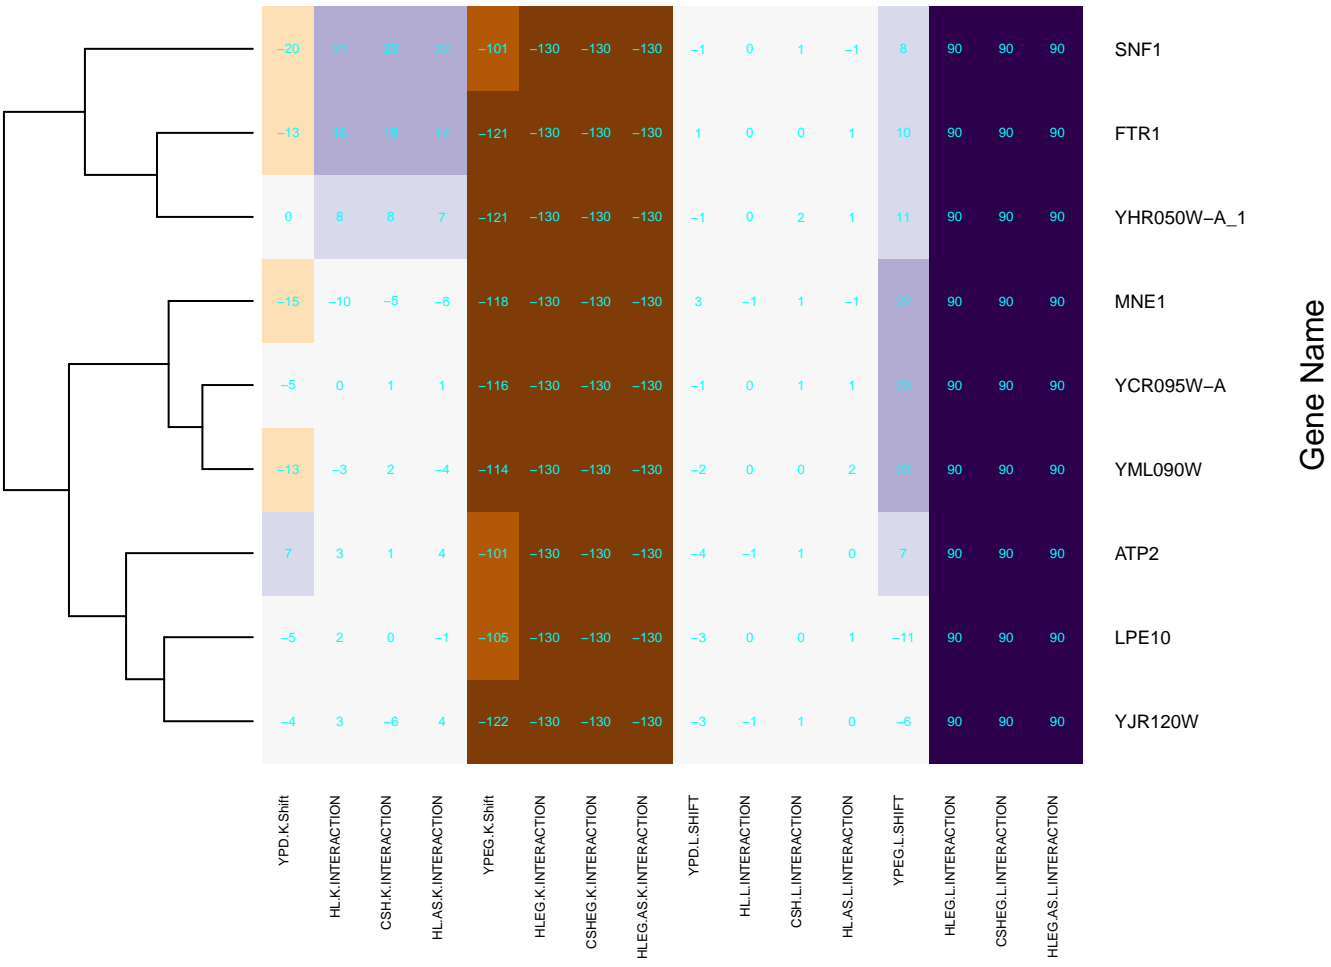

Color Key

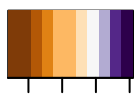

-100 0  
Value

4-0.1.1.0-1

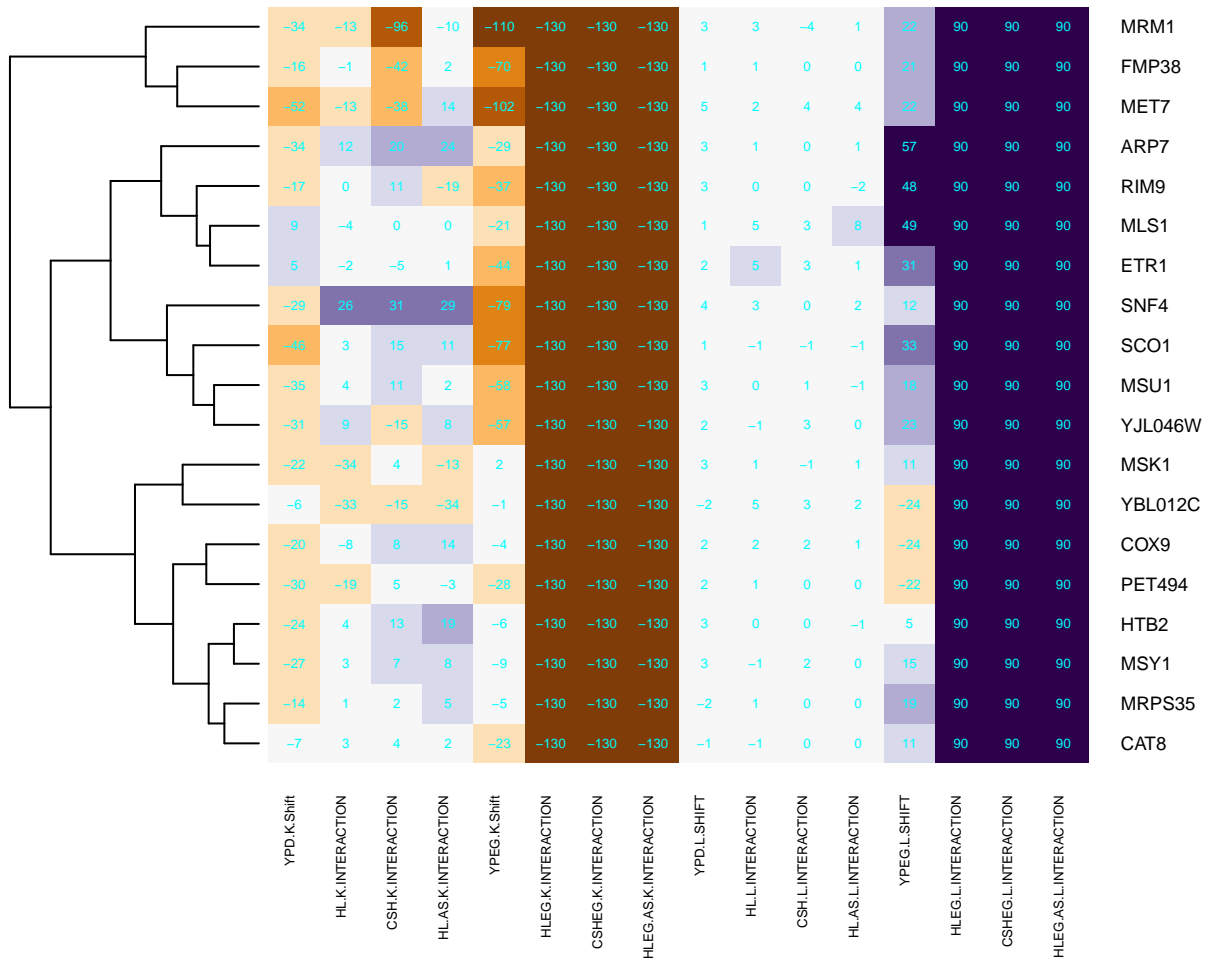

Gene Name

Type of Media

Color Key



4-0.1.1.1-0

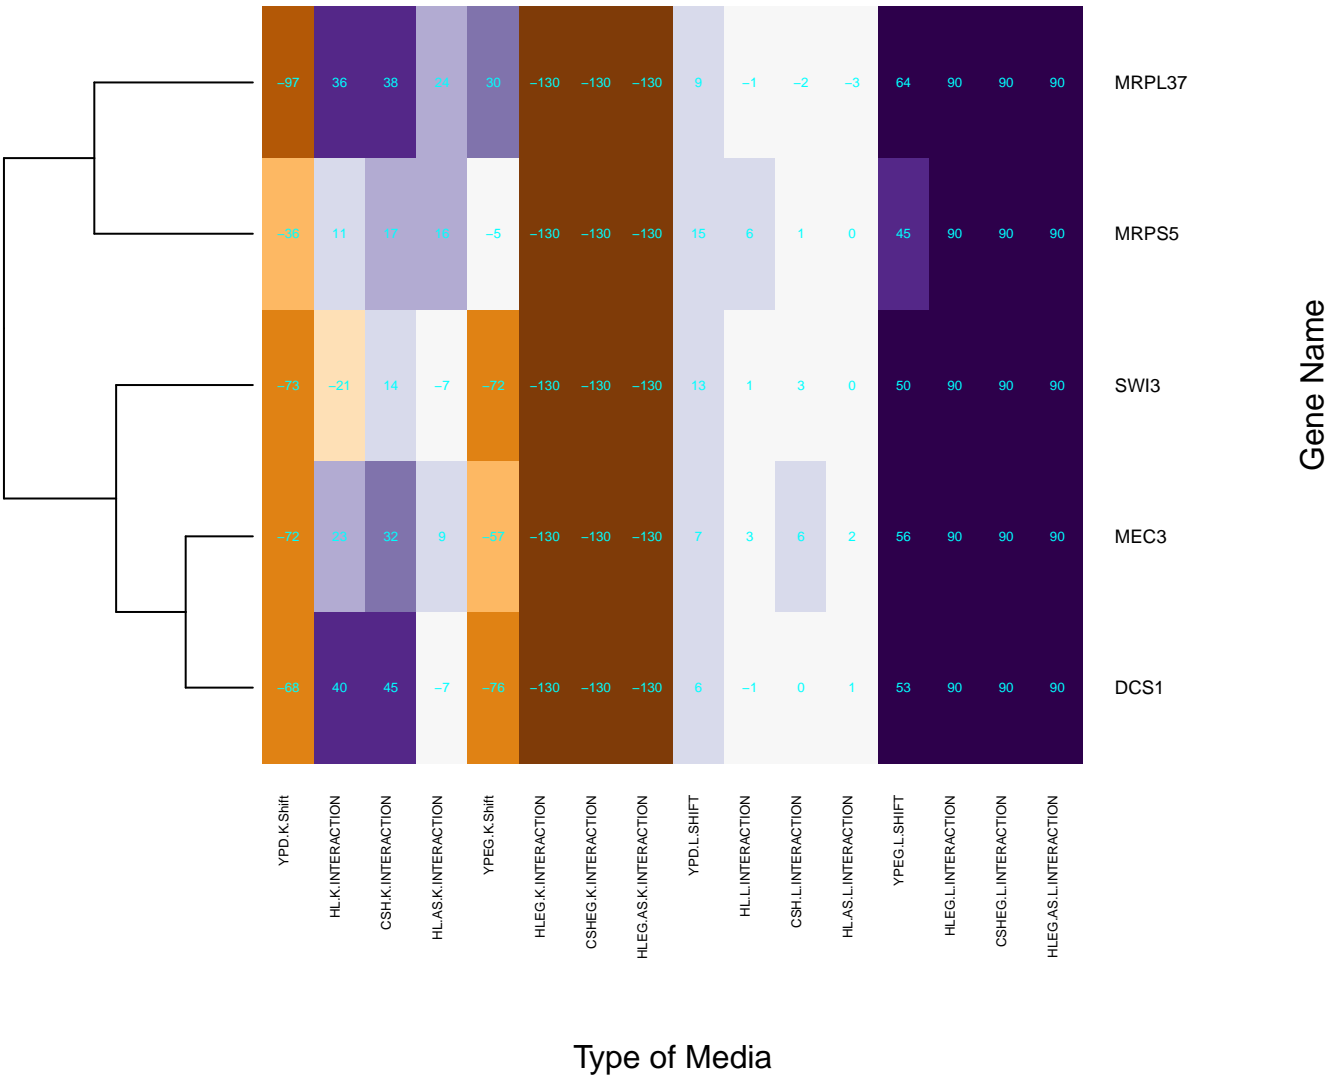

Color Key



4-0.1.1.1-1

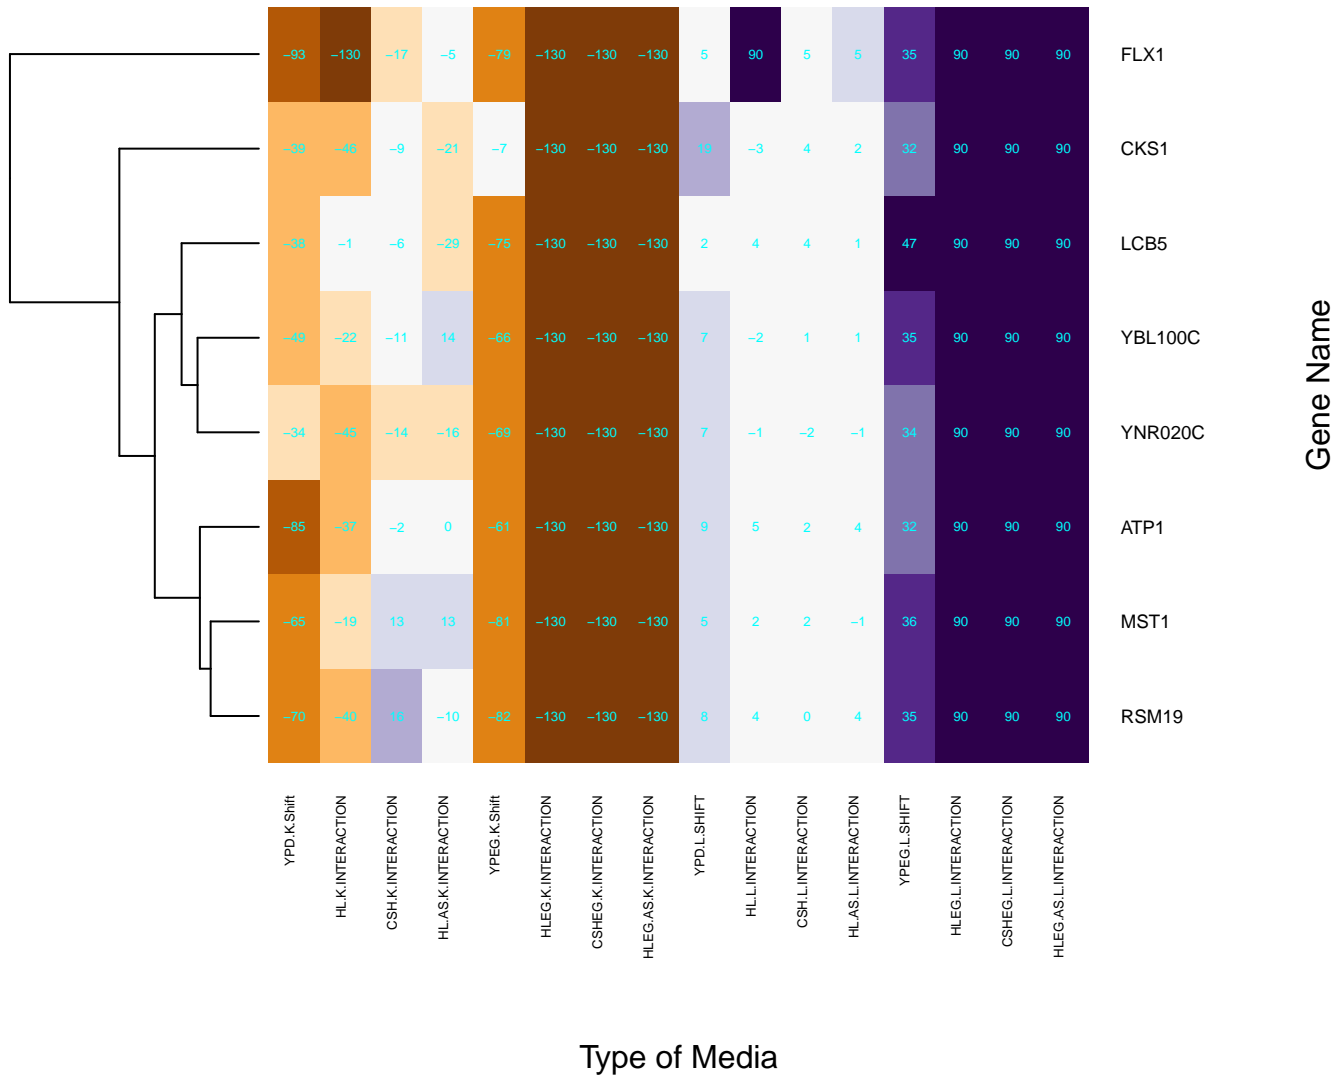

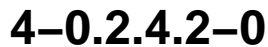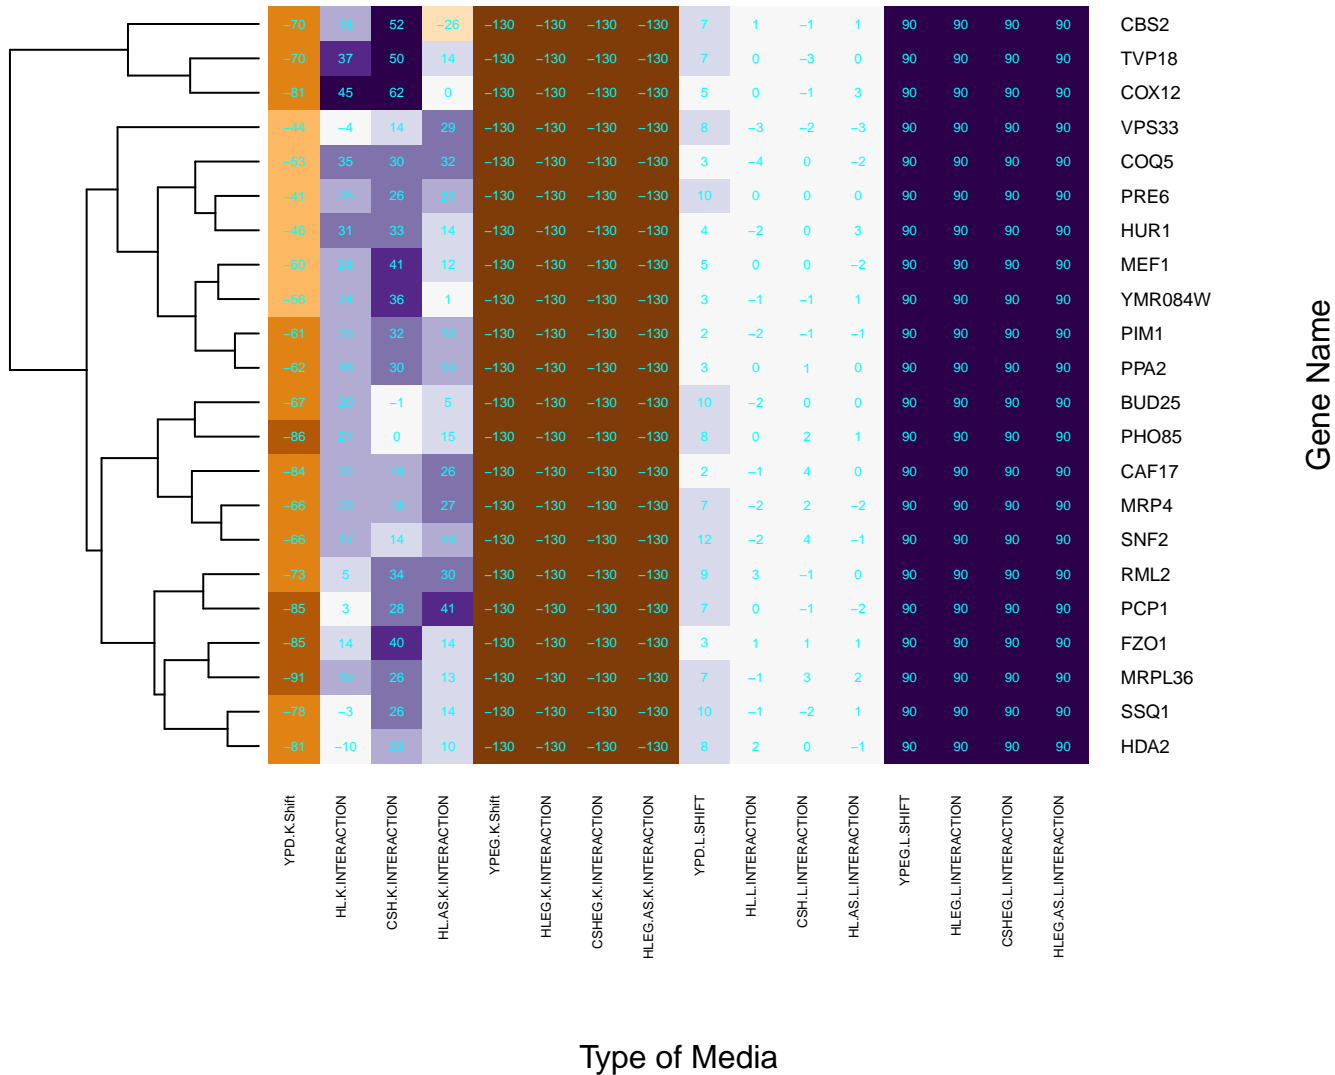

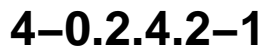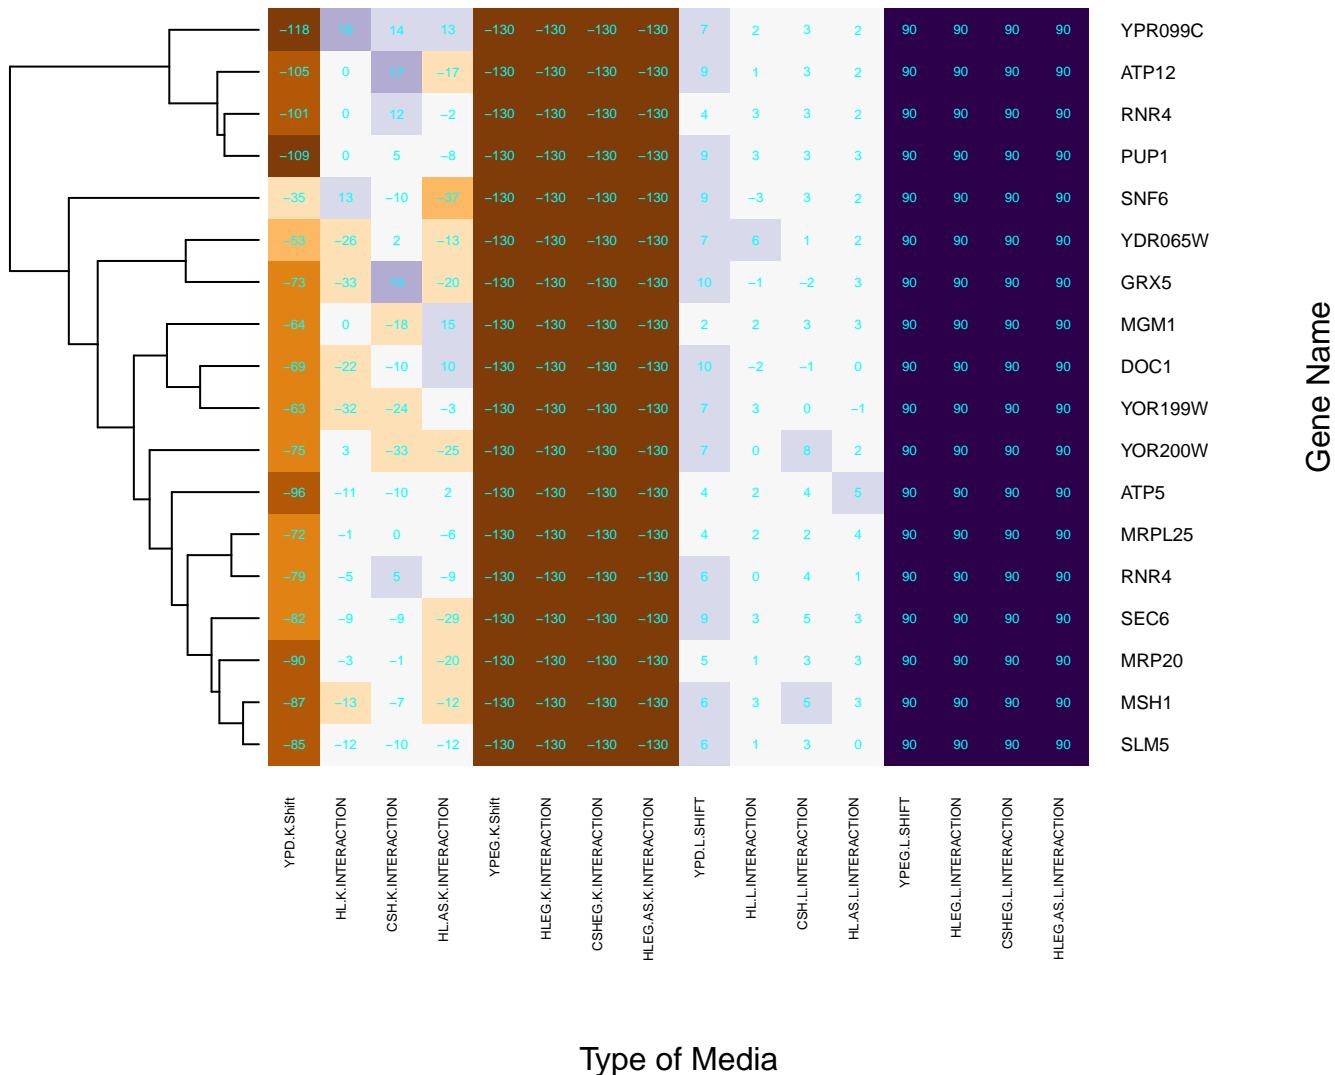

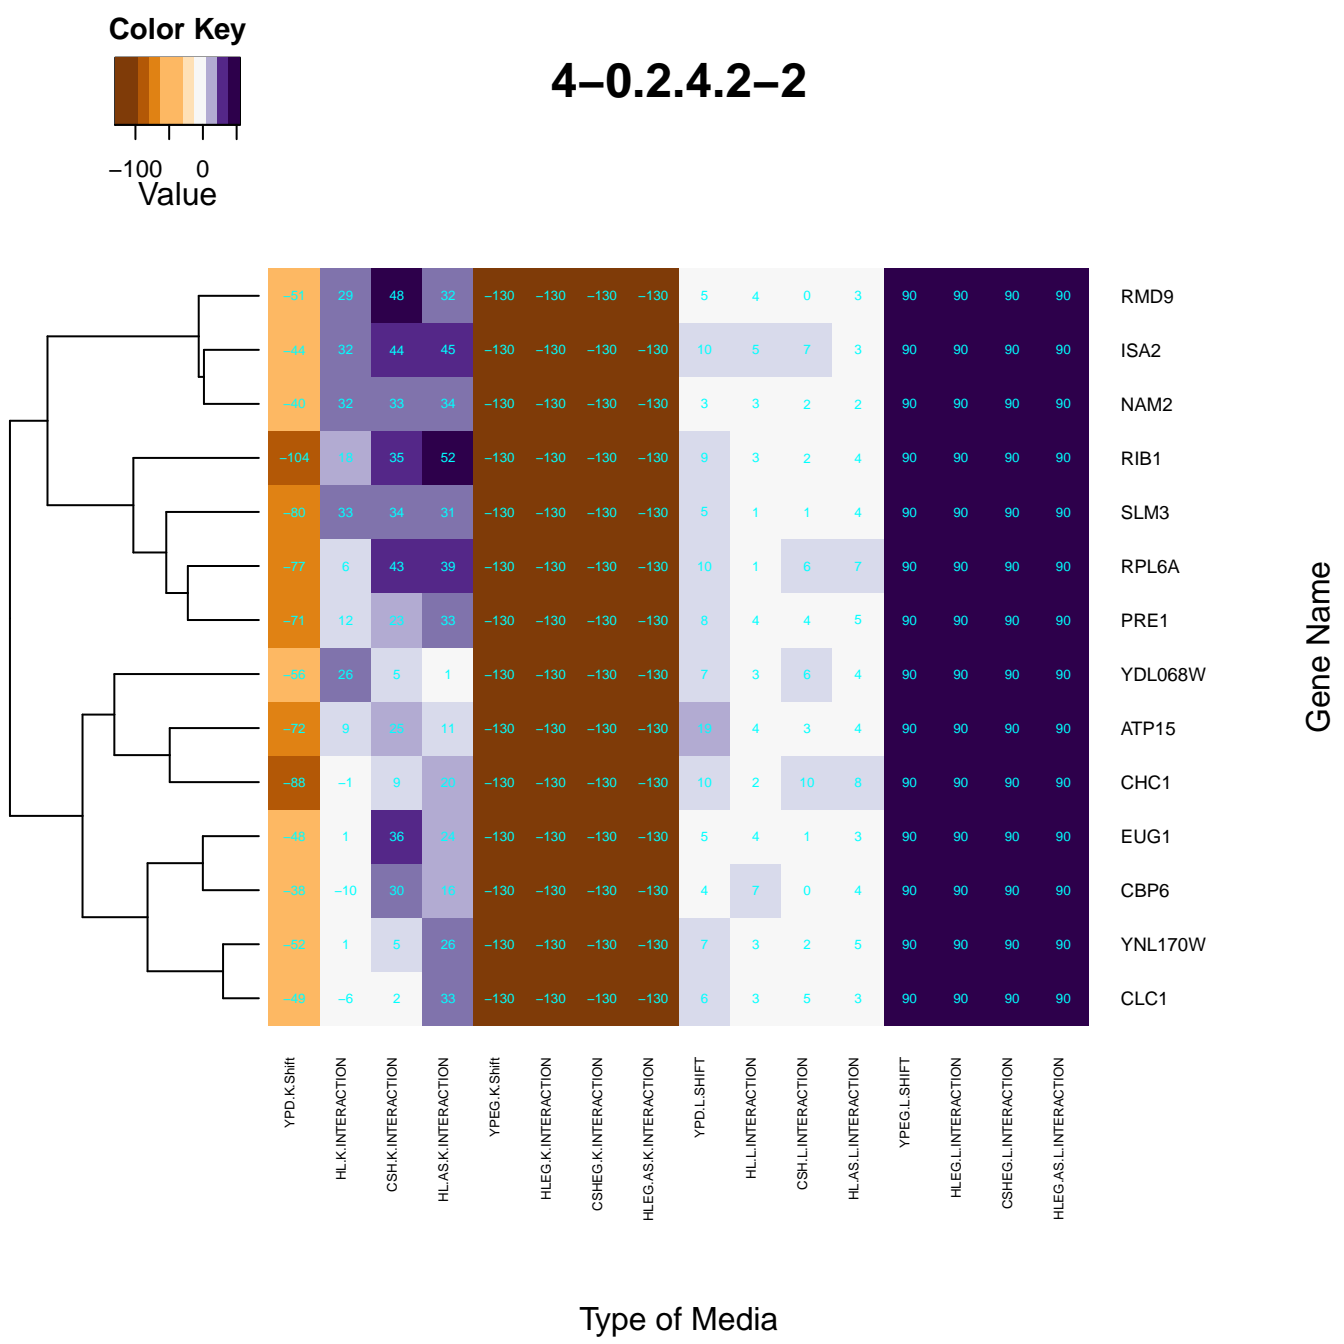

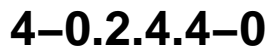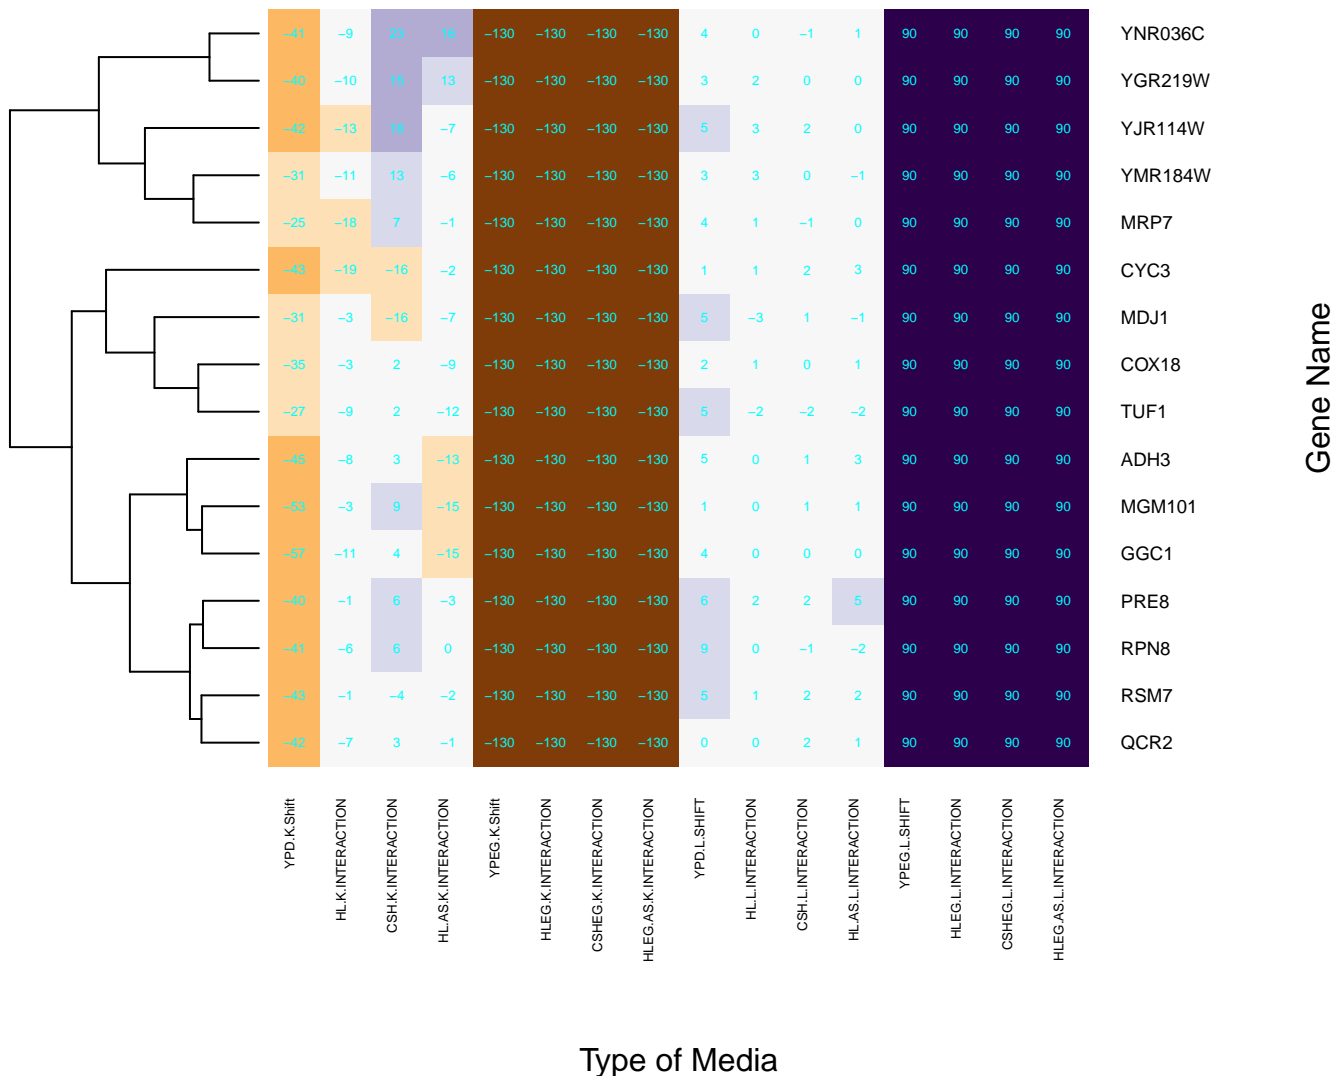



4-0.2.4.4-1

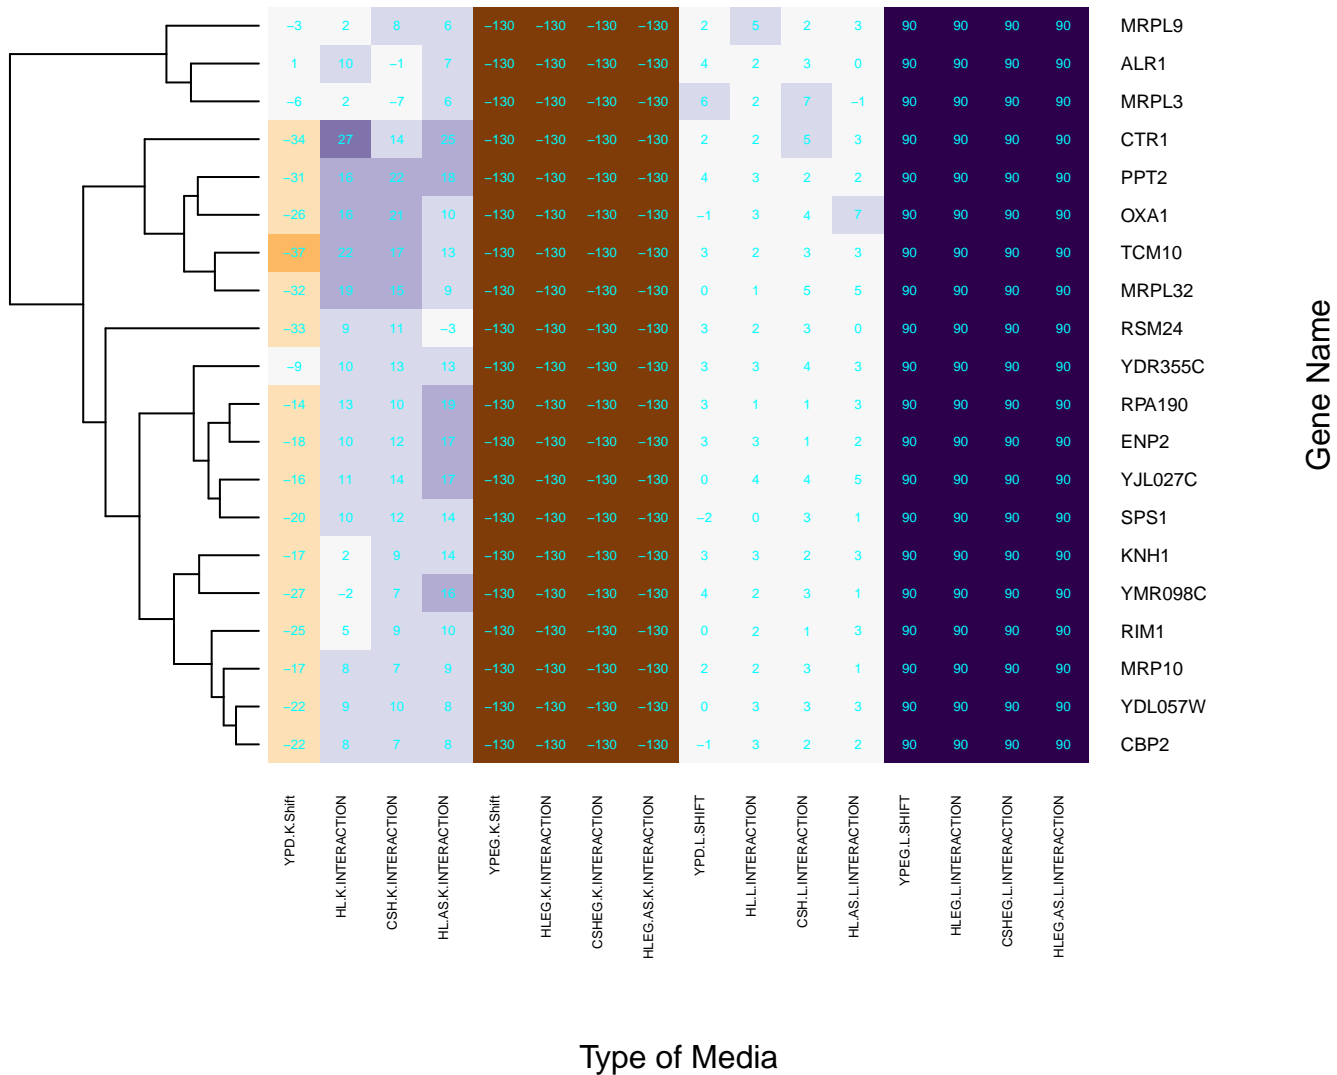

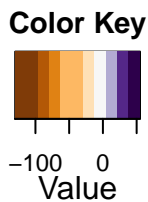

4-0.2.4.4-2

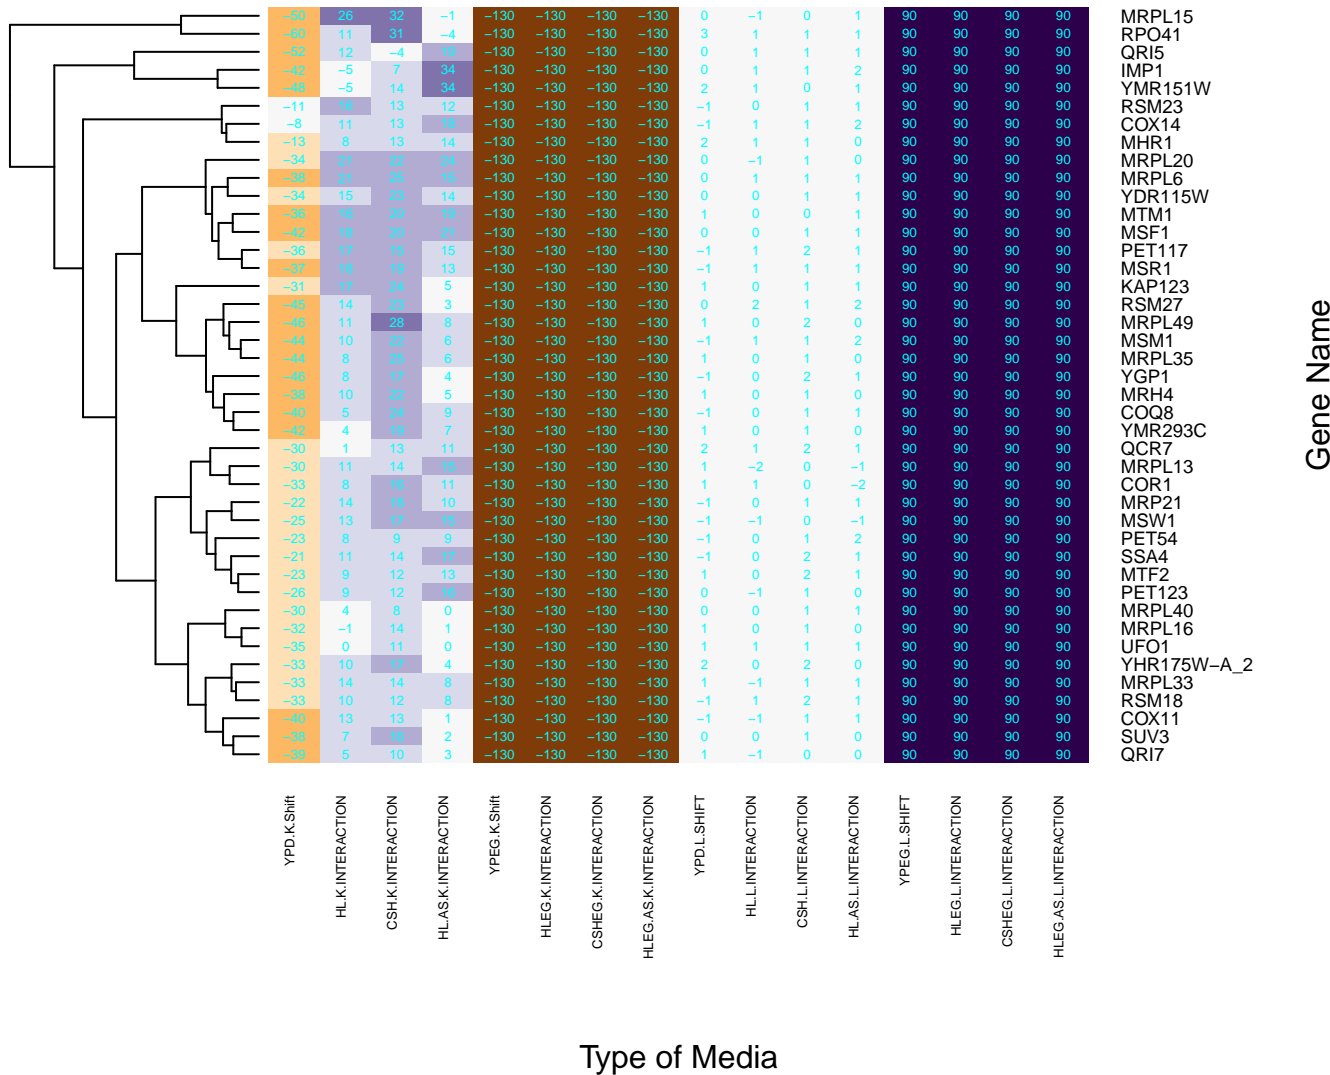

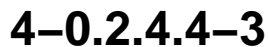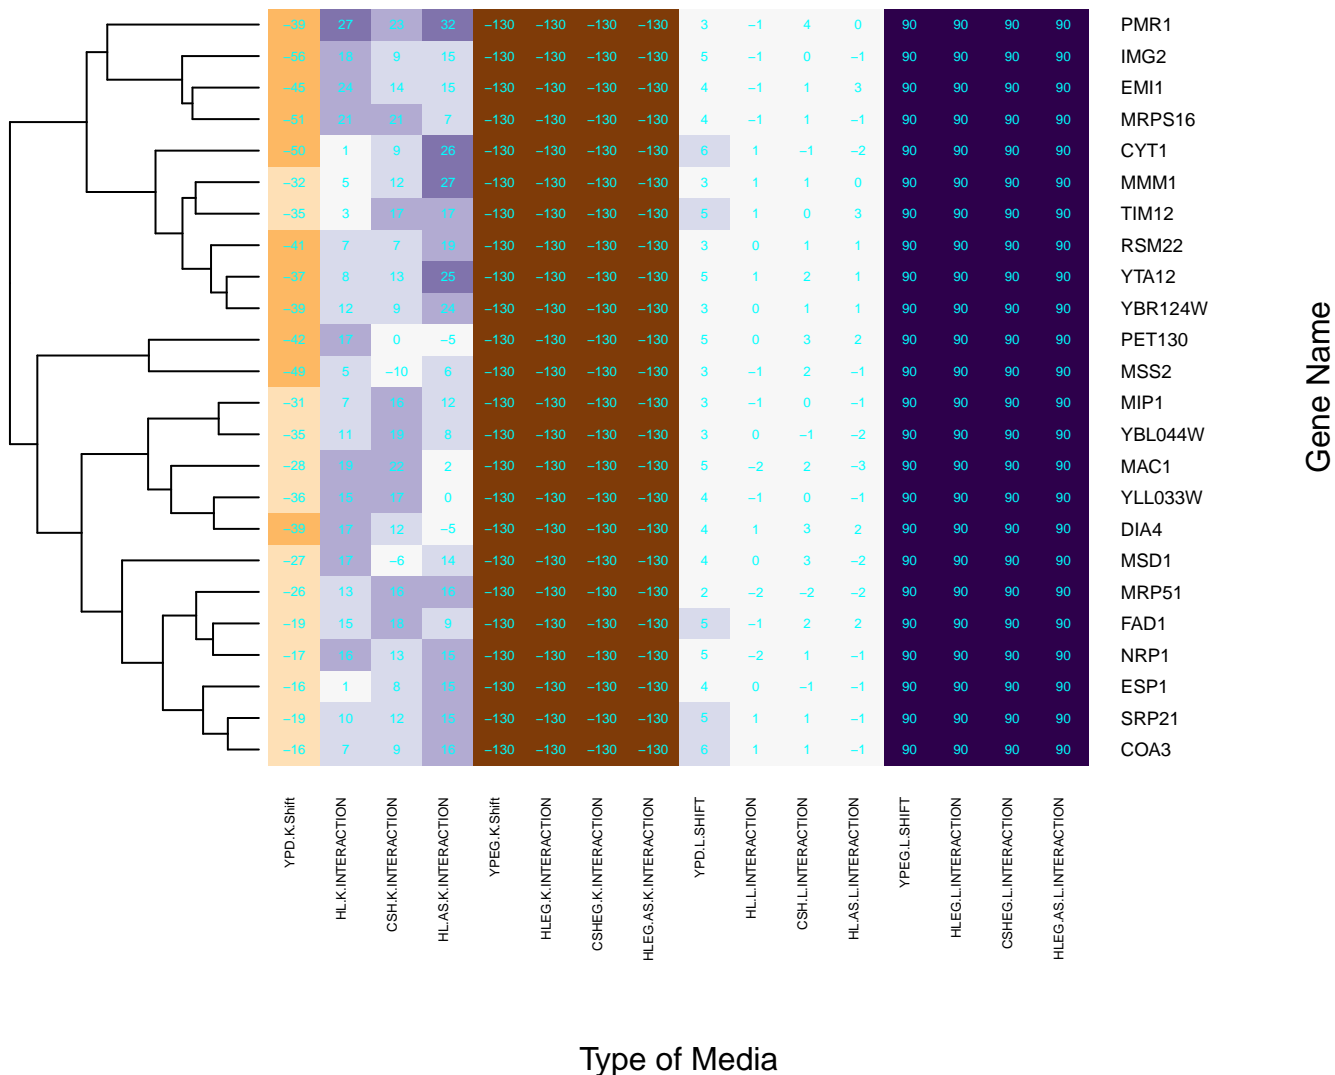

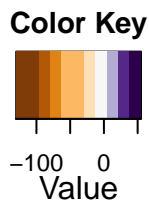

4-0.2.4.4-4

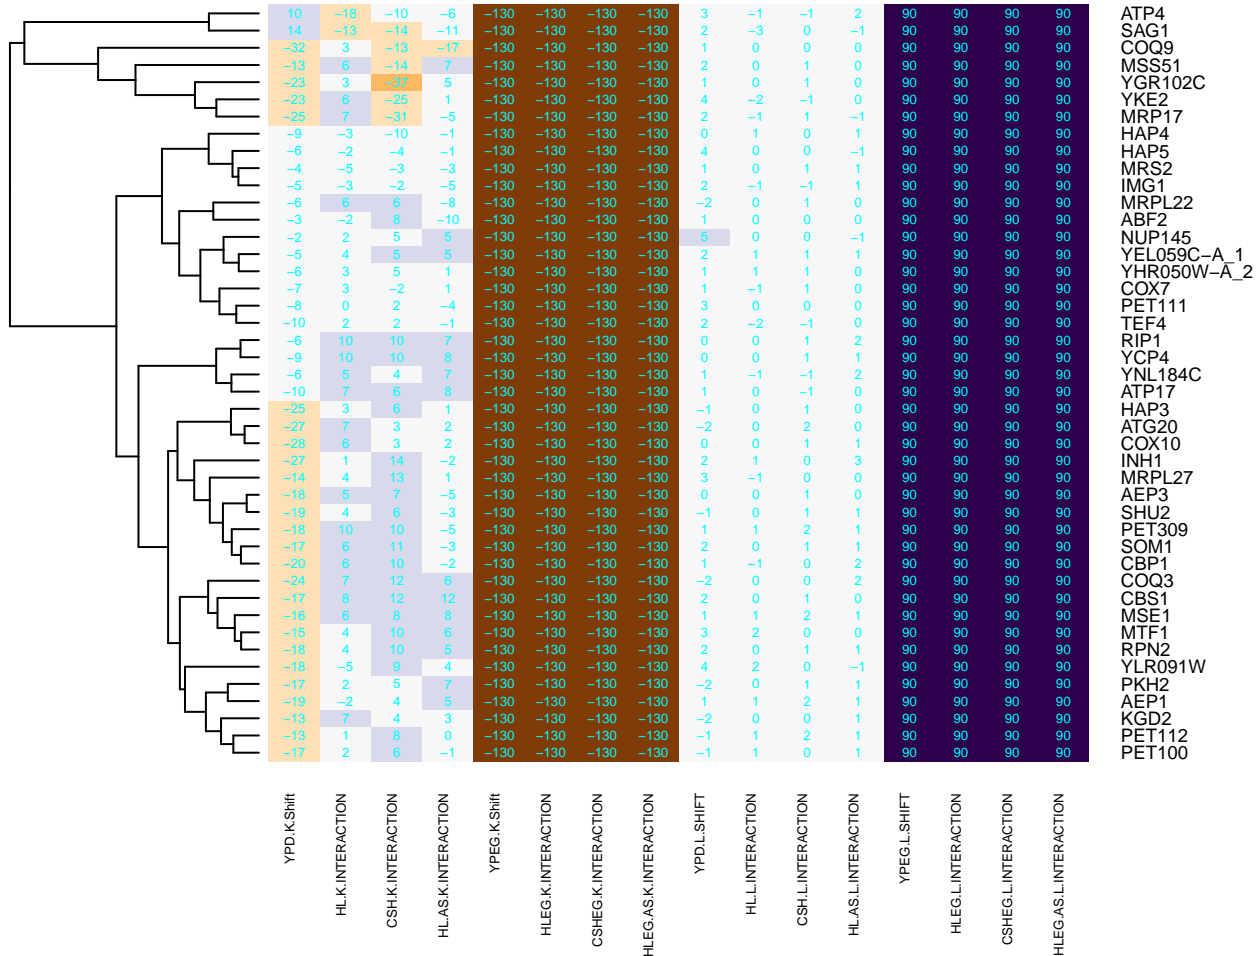

Color Key



4-0.2.4.4-5

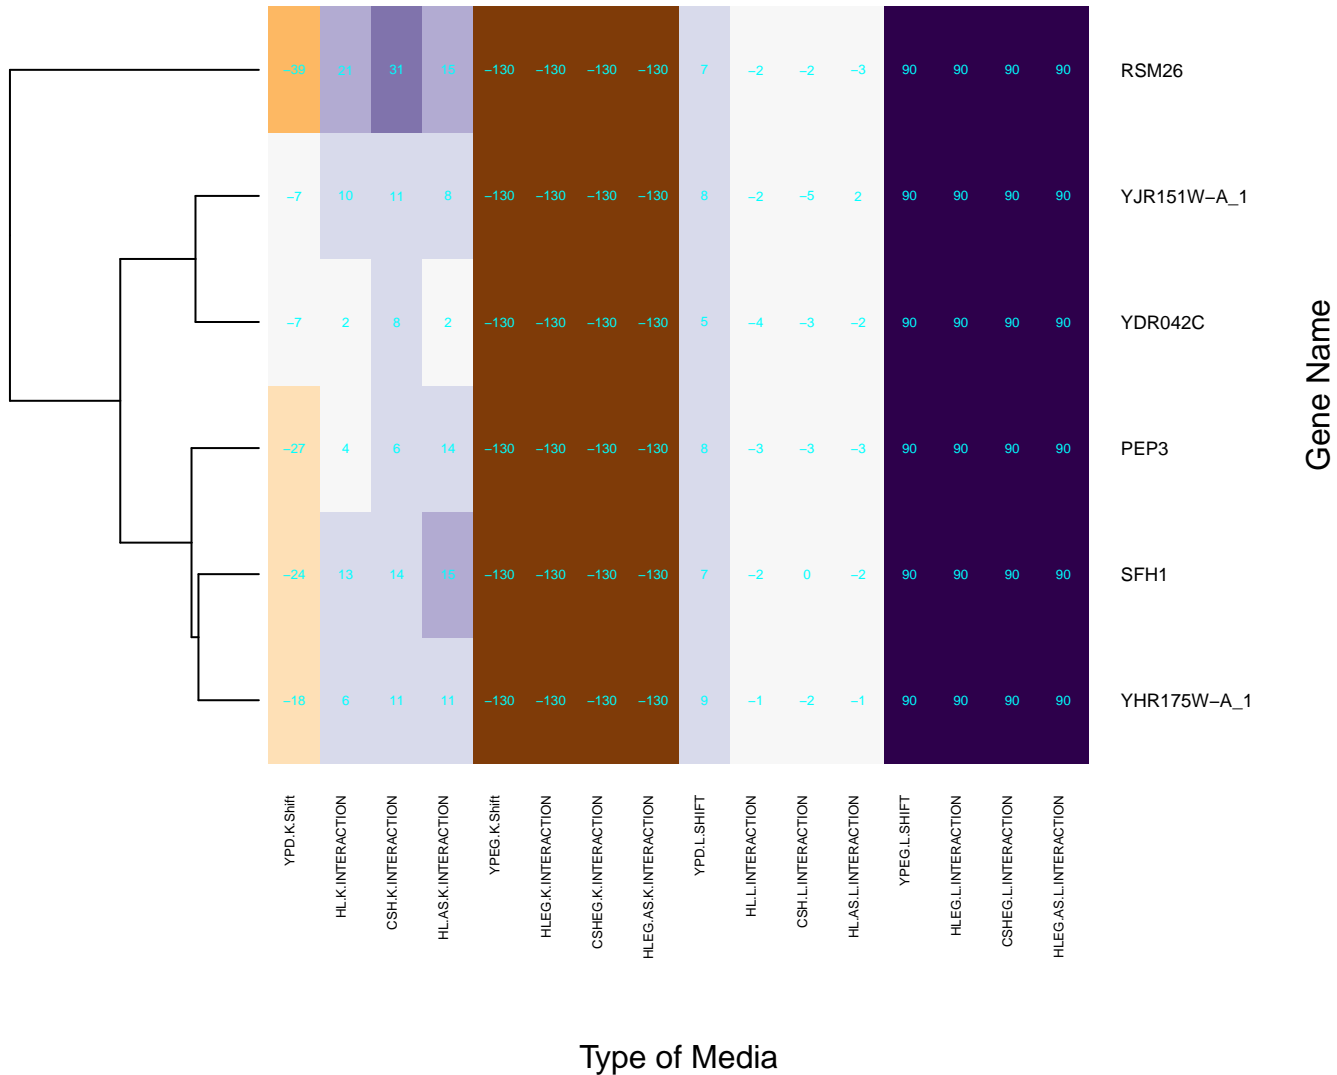

Color Key

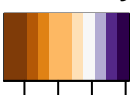

-100 0  
Value

4-0.2.4.4-6

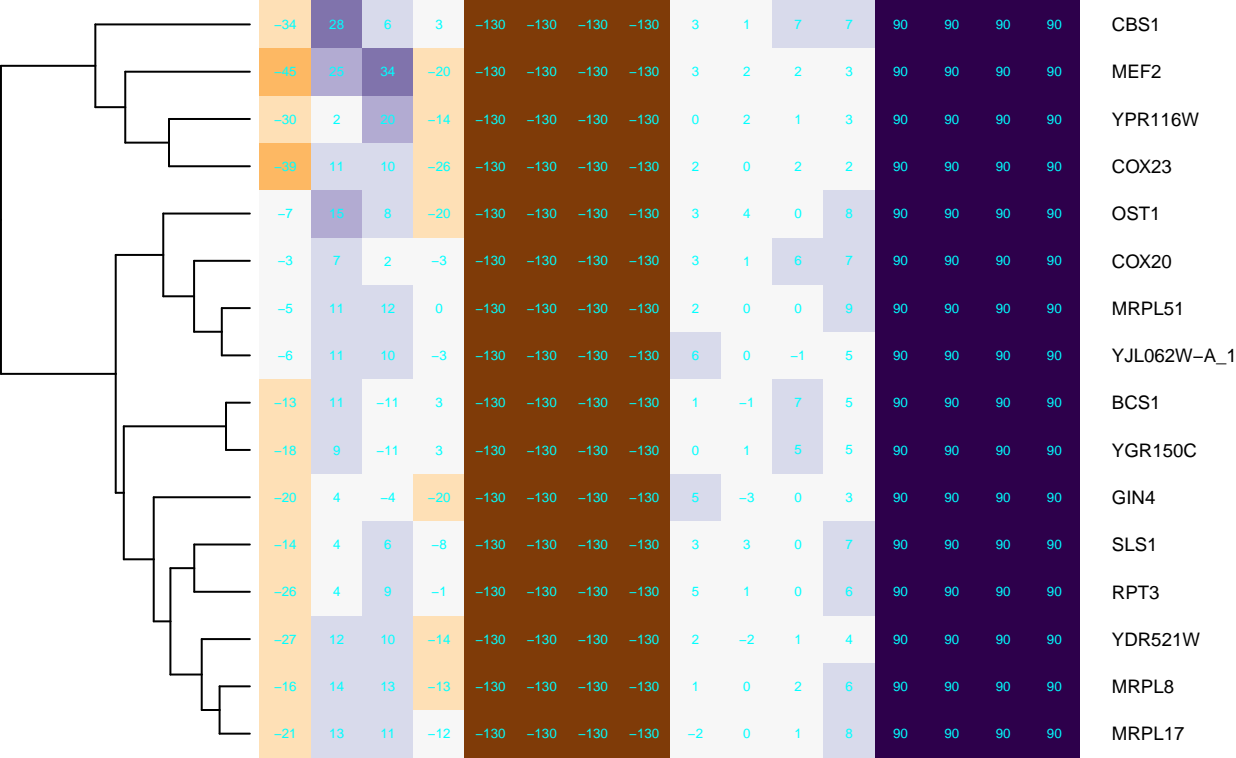

Gene Name

Type of Media

Color Key

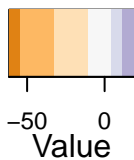

4-0.3.7.0-0

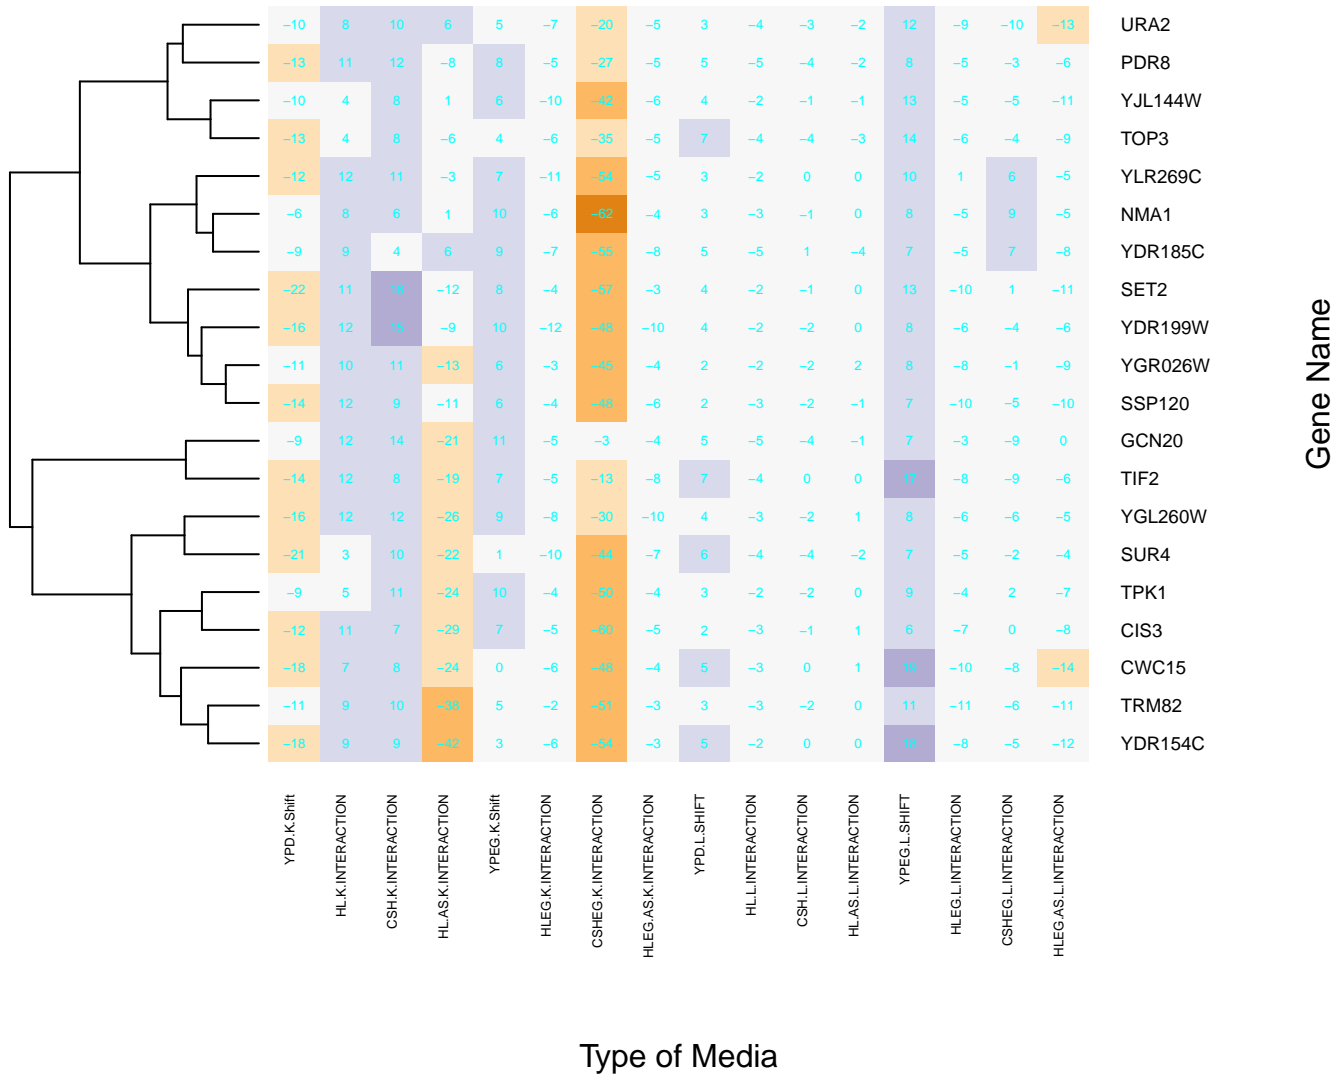

Color Key

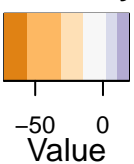

4-0.3.7.0-1

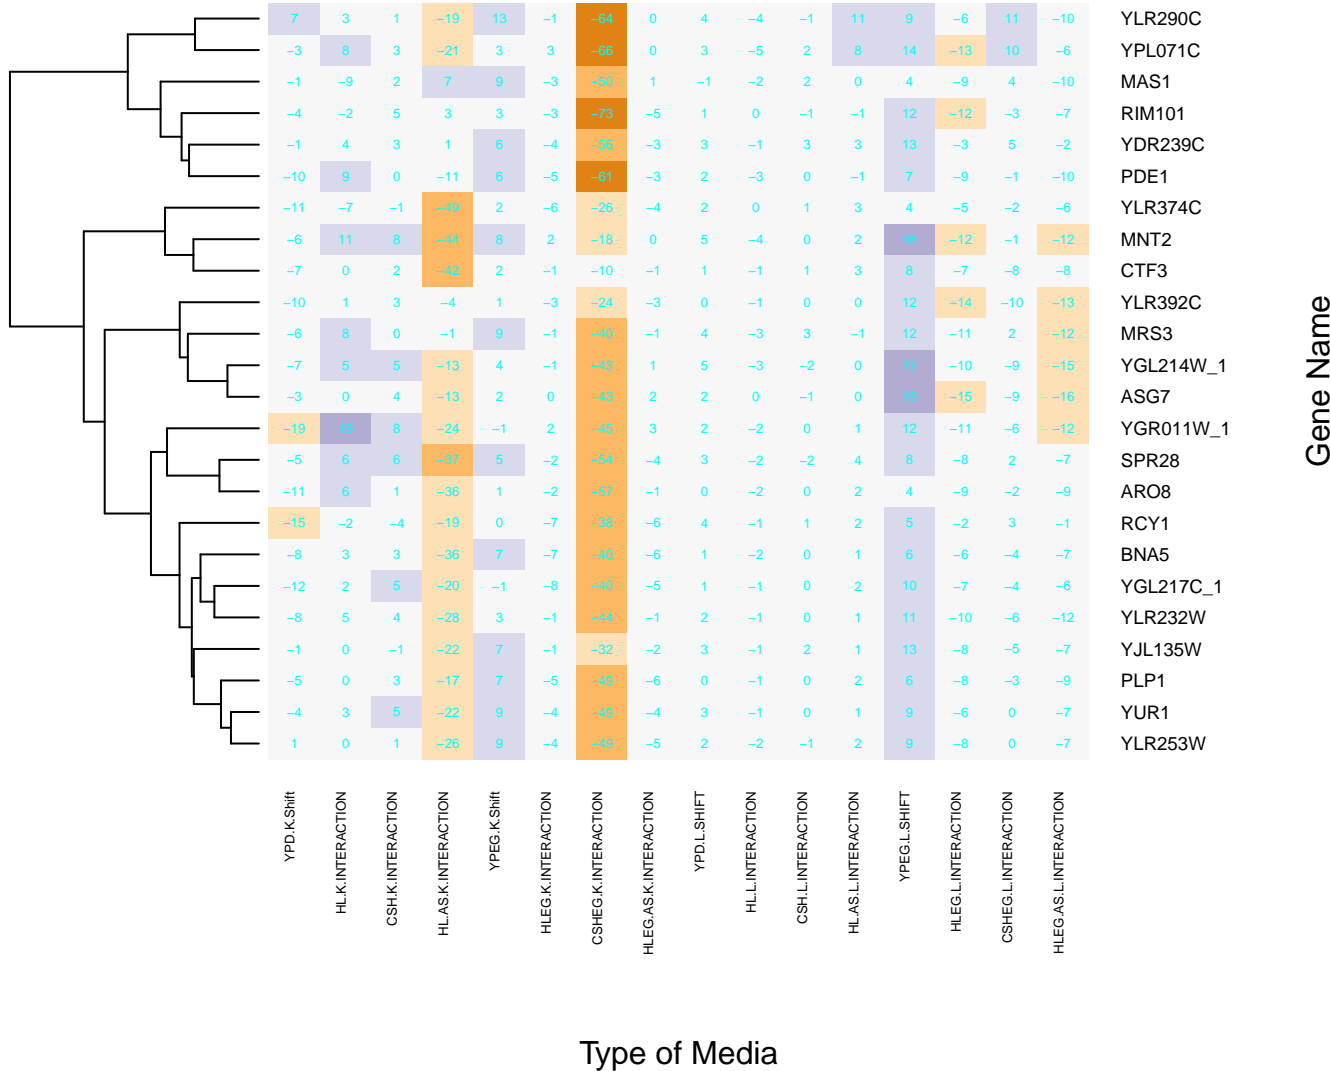

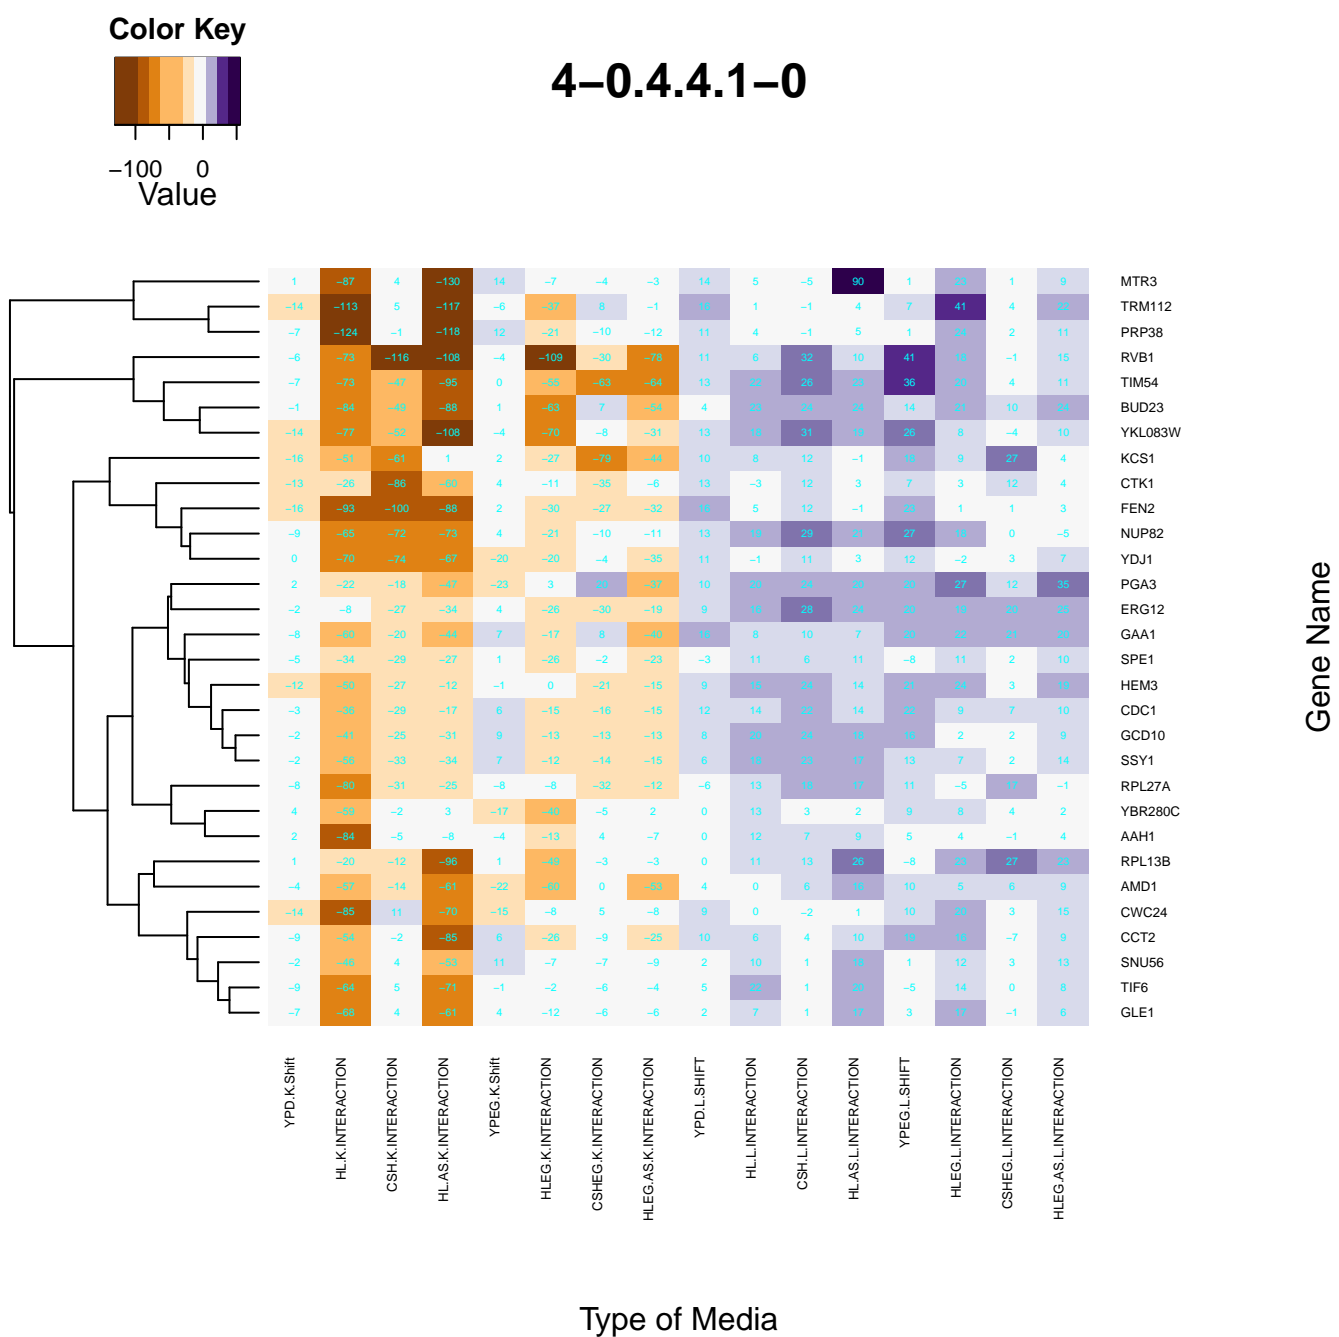

Color Key



4-0.4.4.1-1

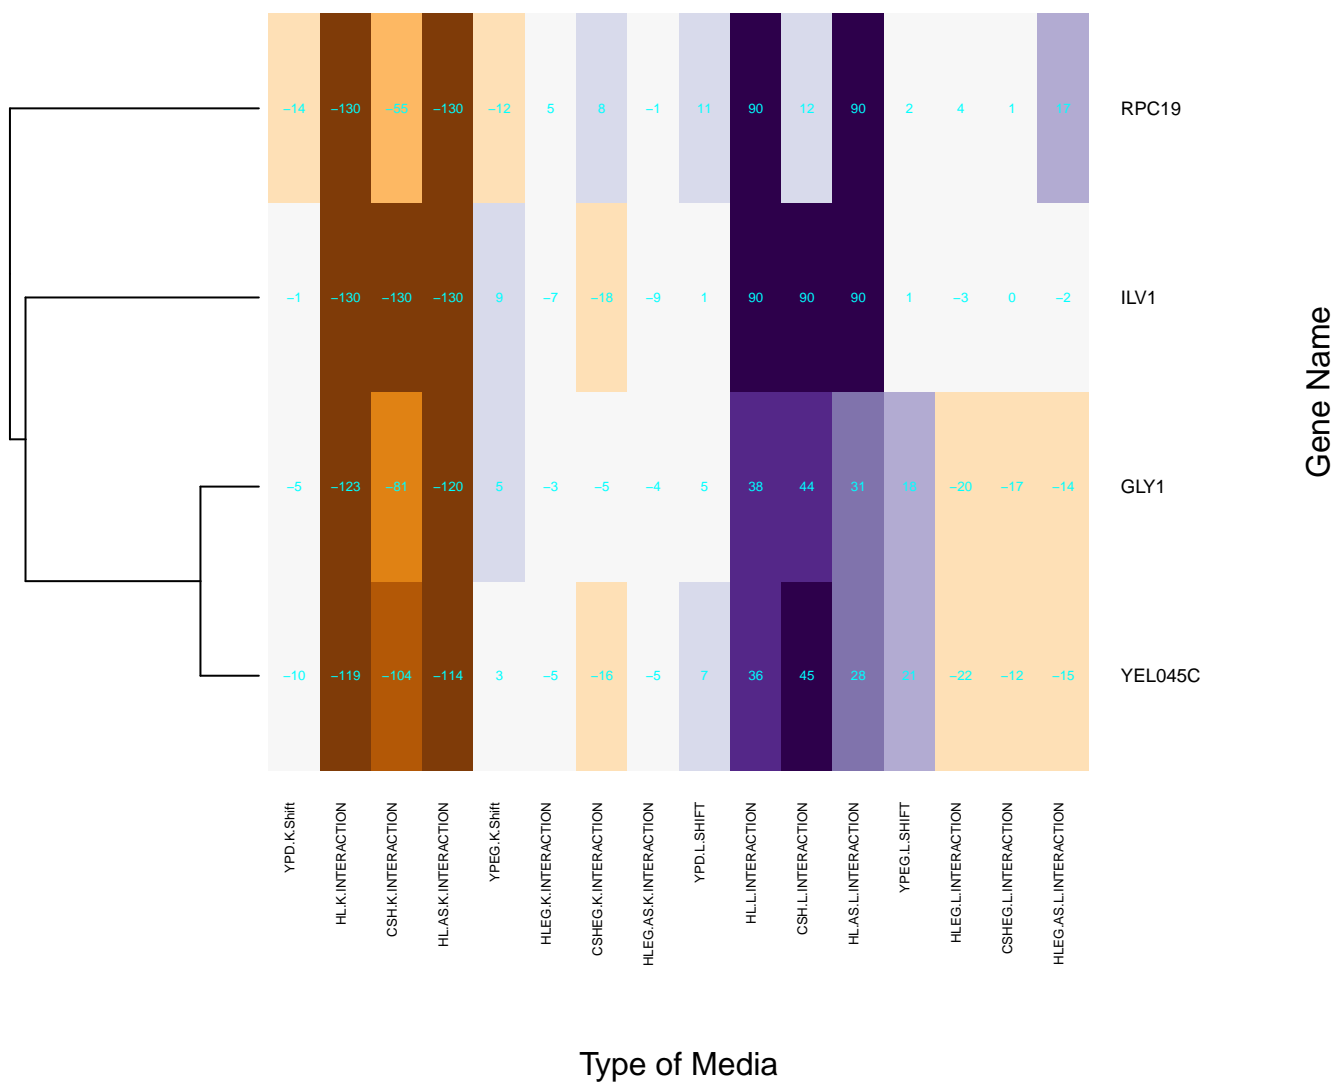

Color Key

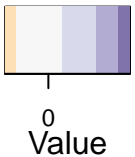

4-0.5.13.0-0

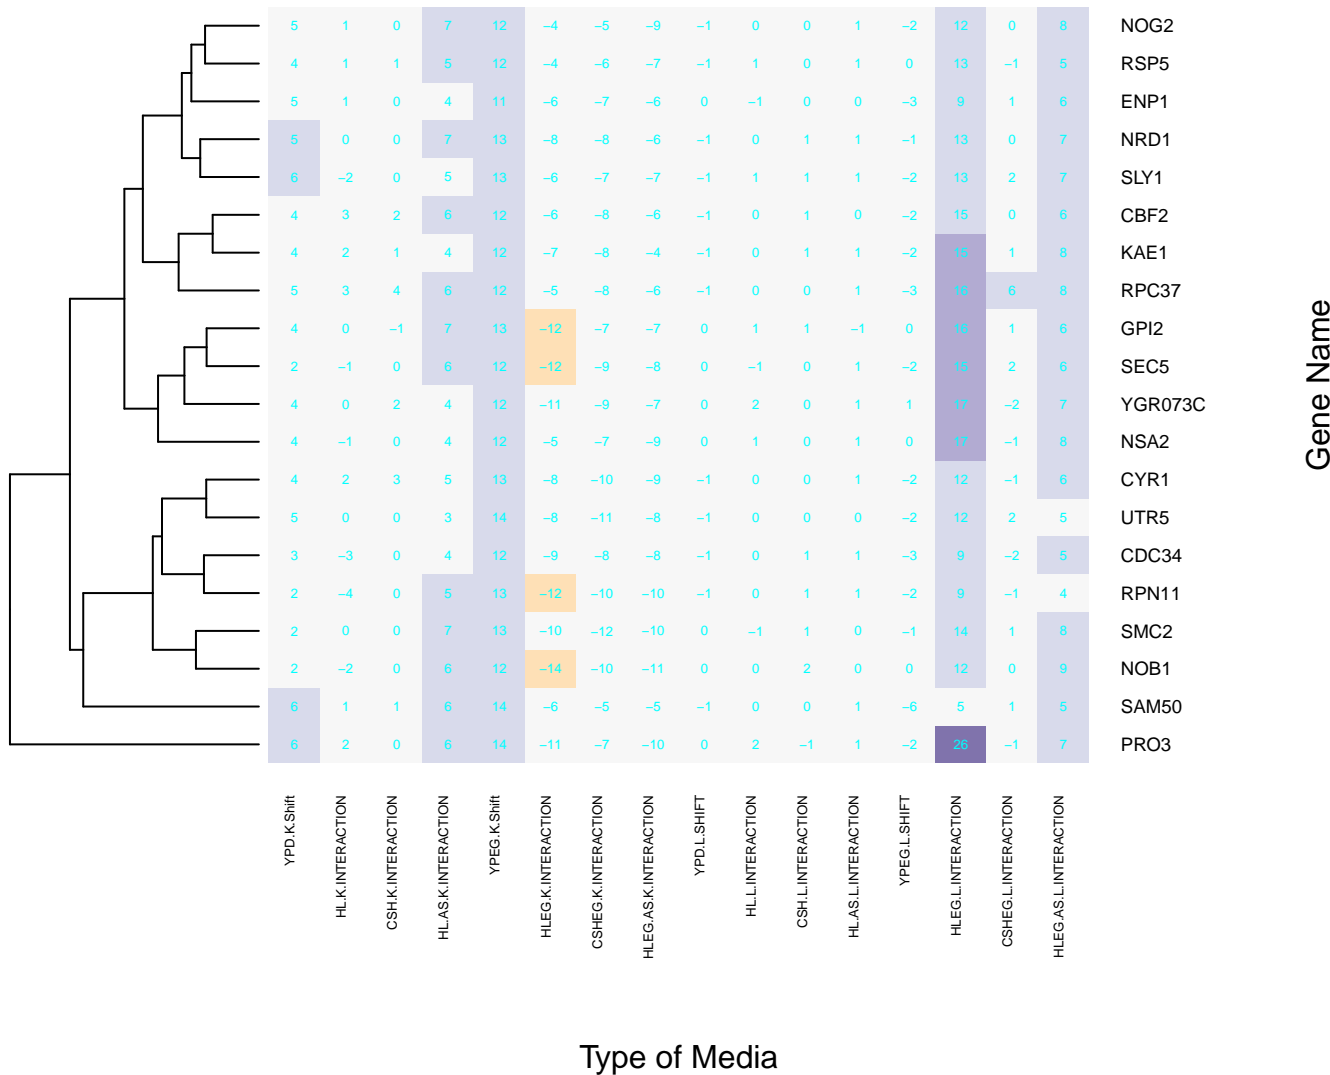

Color Key

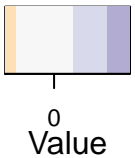

4-0.5.13.0-1

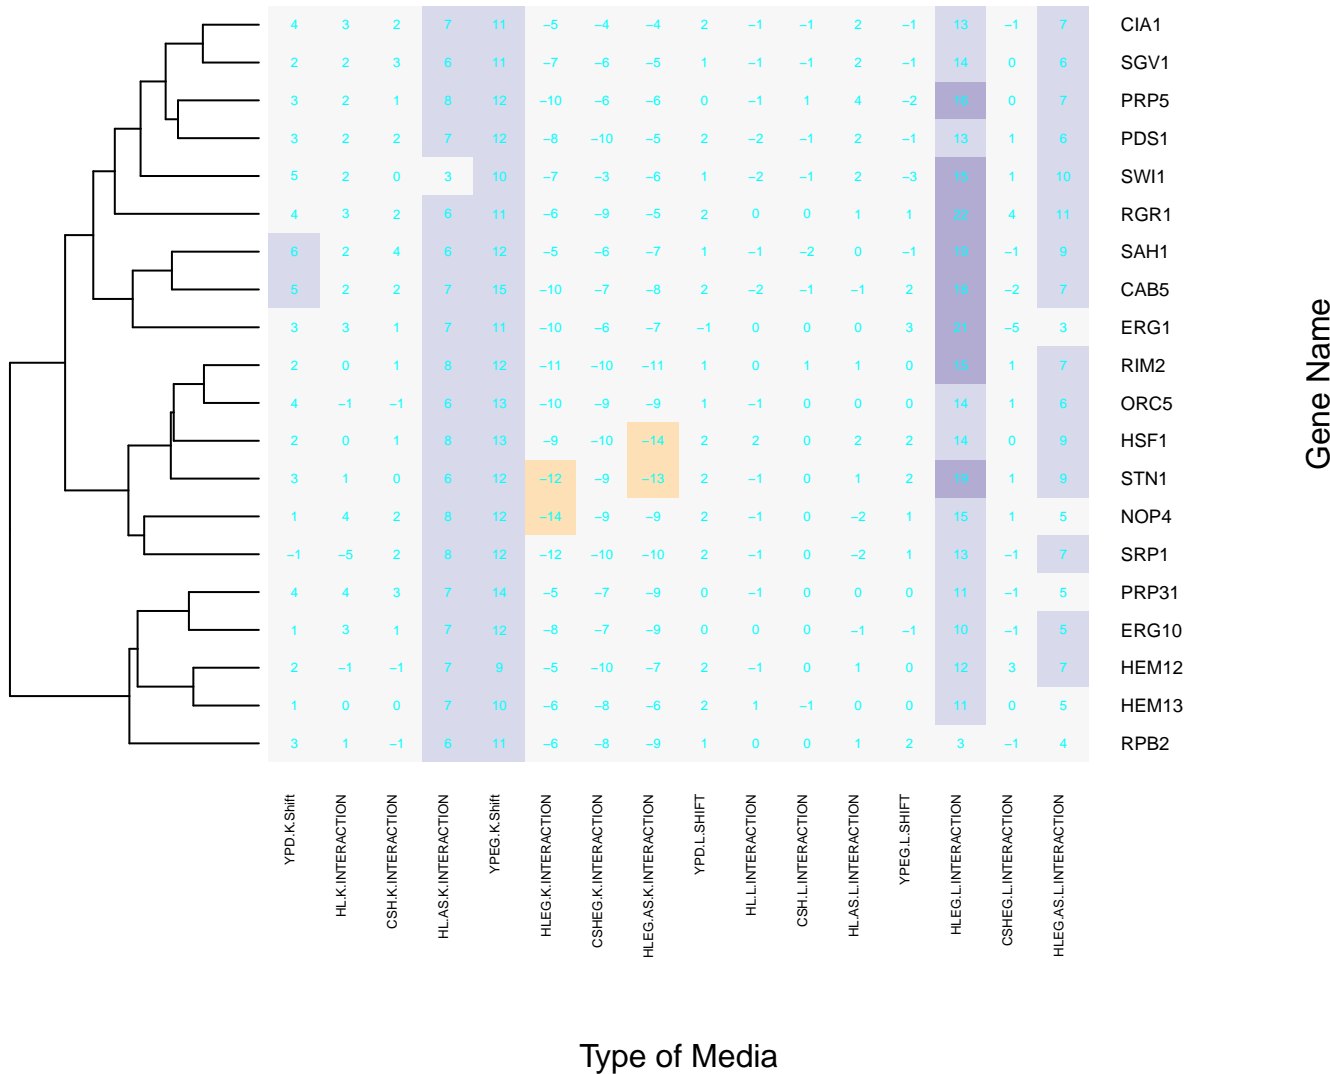

Color Key

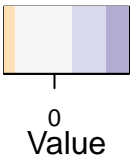

4-0.5.13.1-0

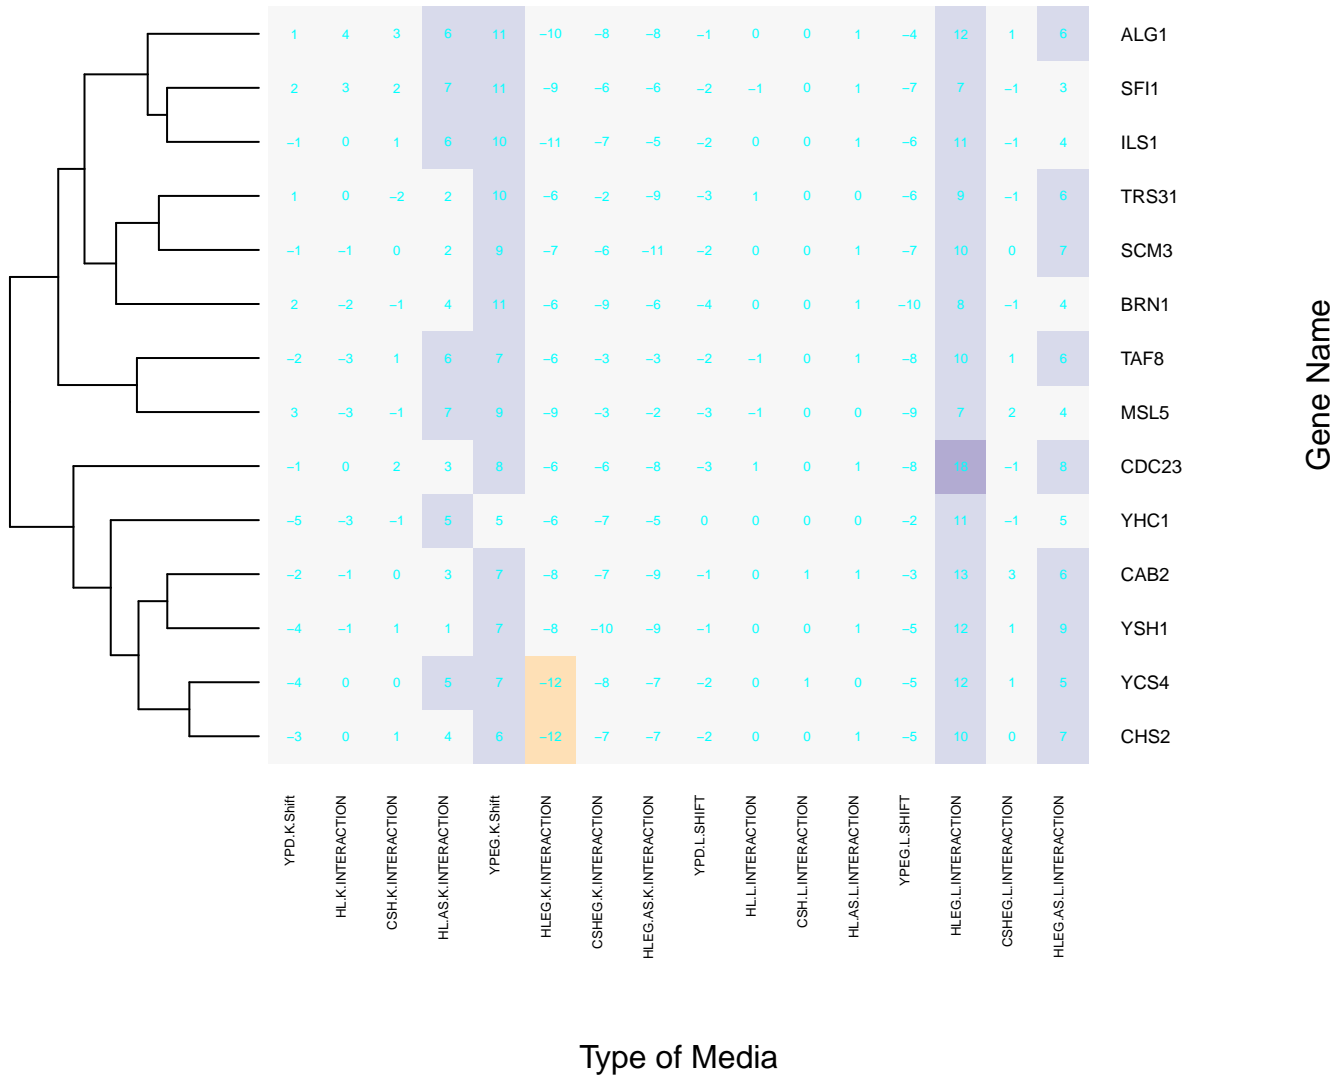

Color Key

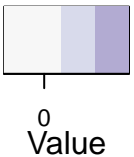

4-0.5.13.1-1

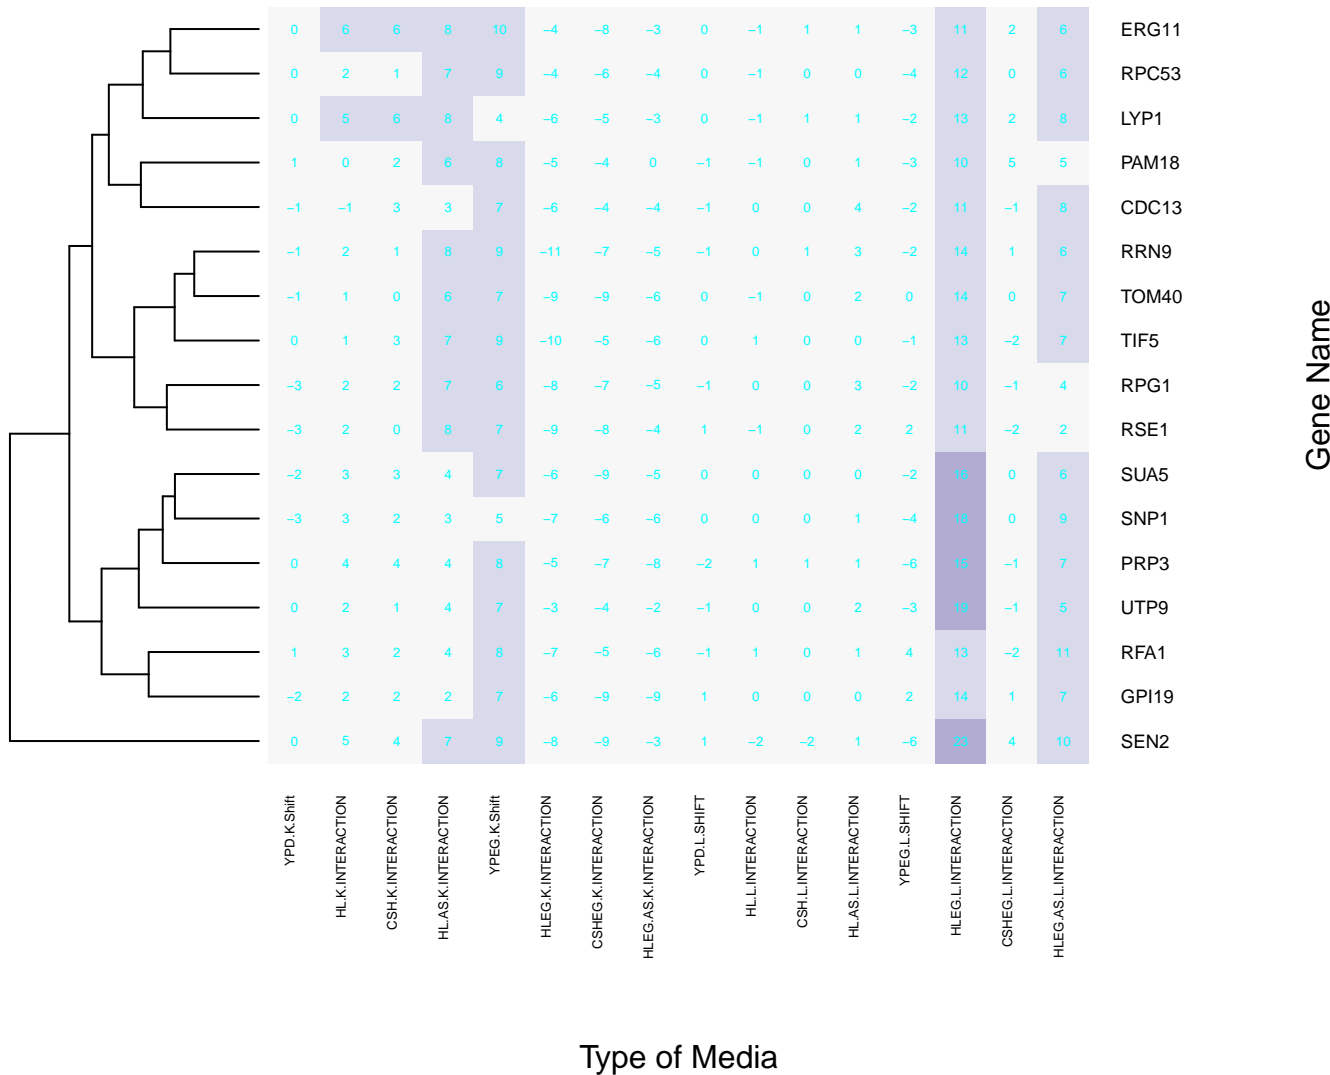

Color Key



4-0.5.14.0-0

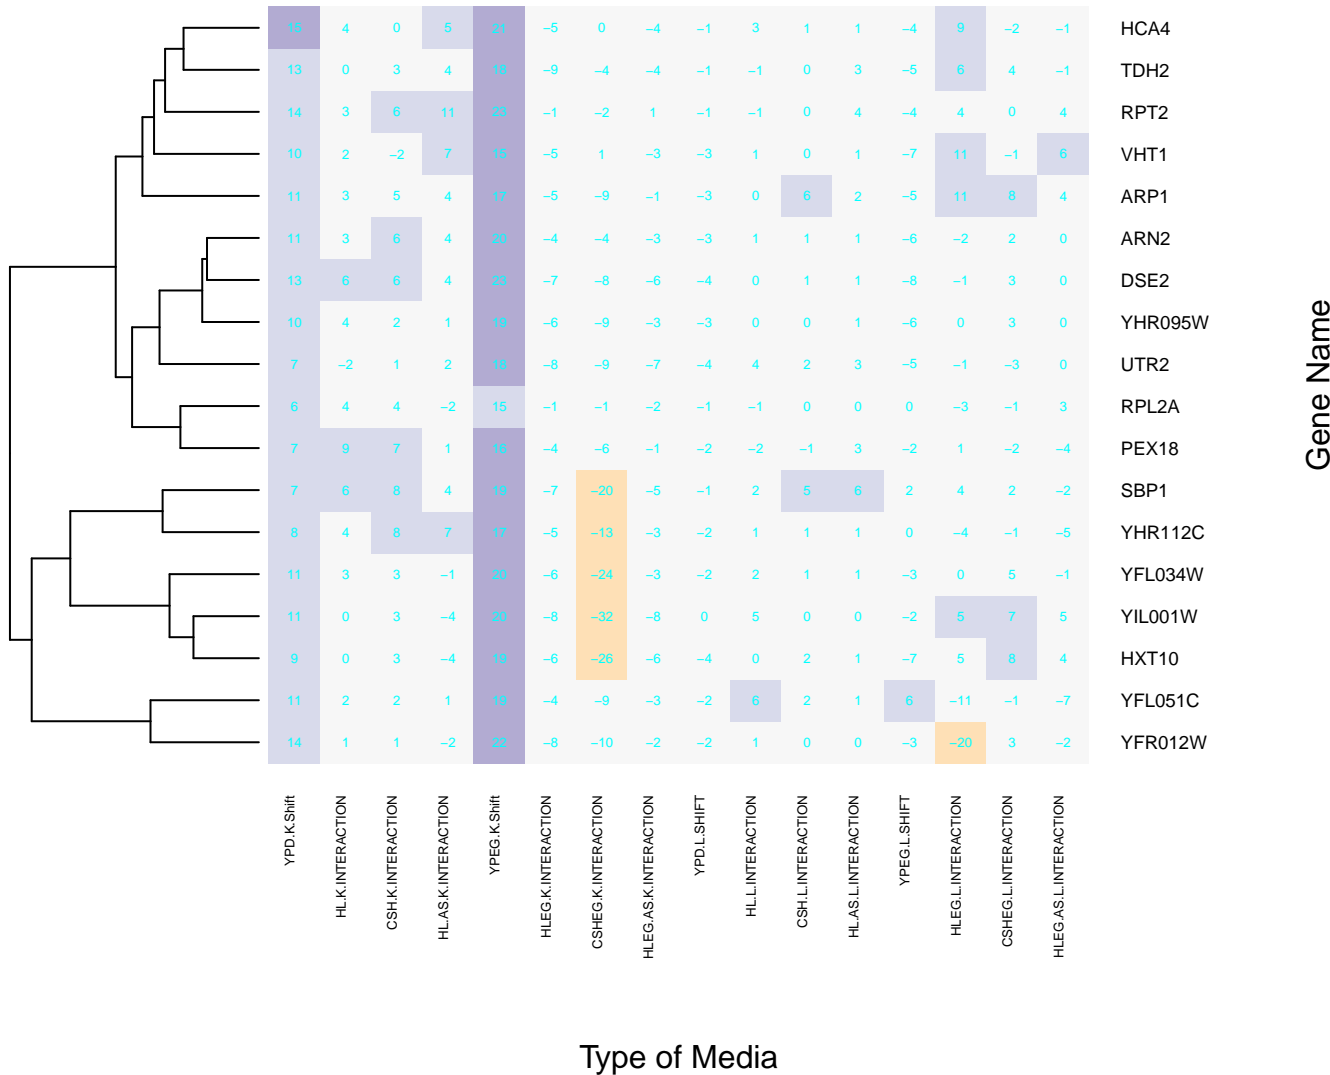

Color Key

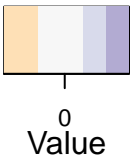

4-0.5.14.0-1

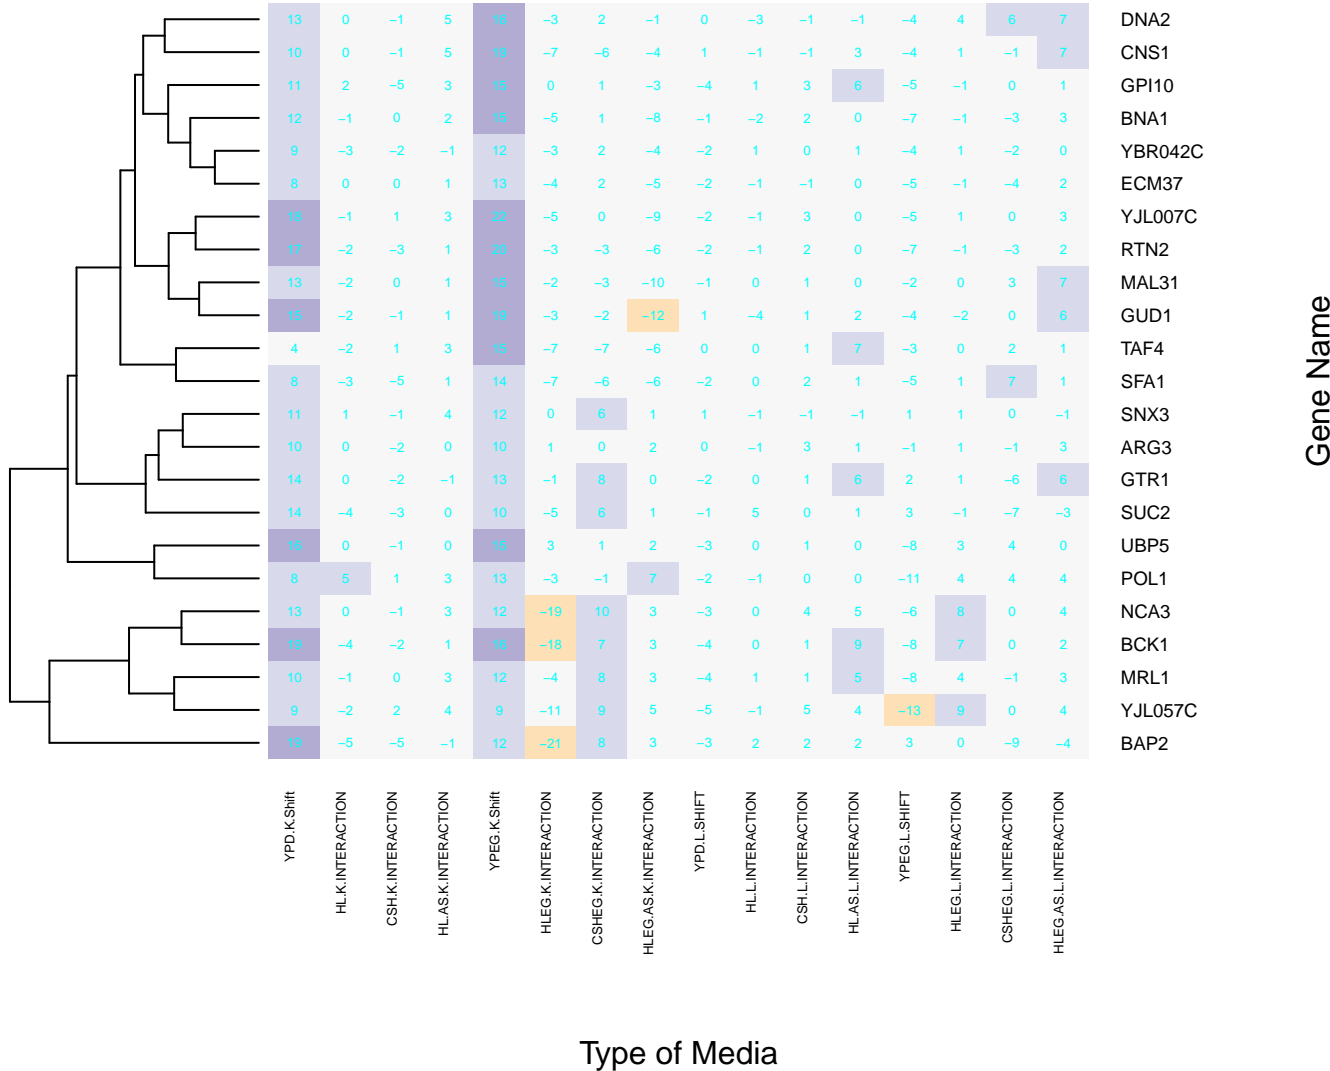

Color Key

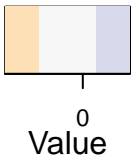

4-0.5.17.0-0

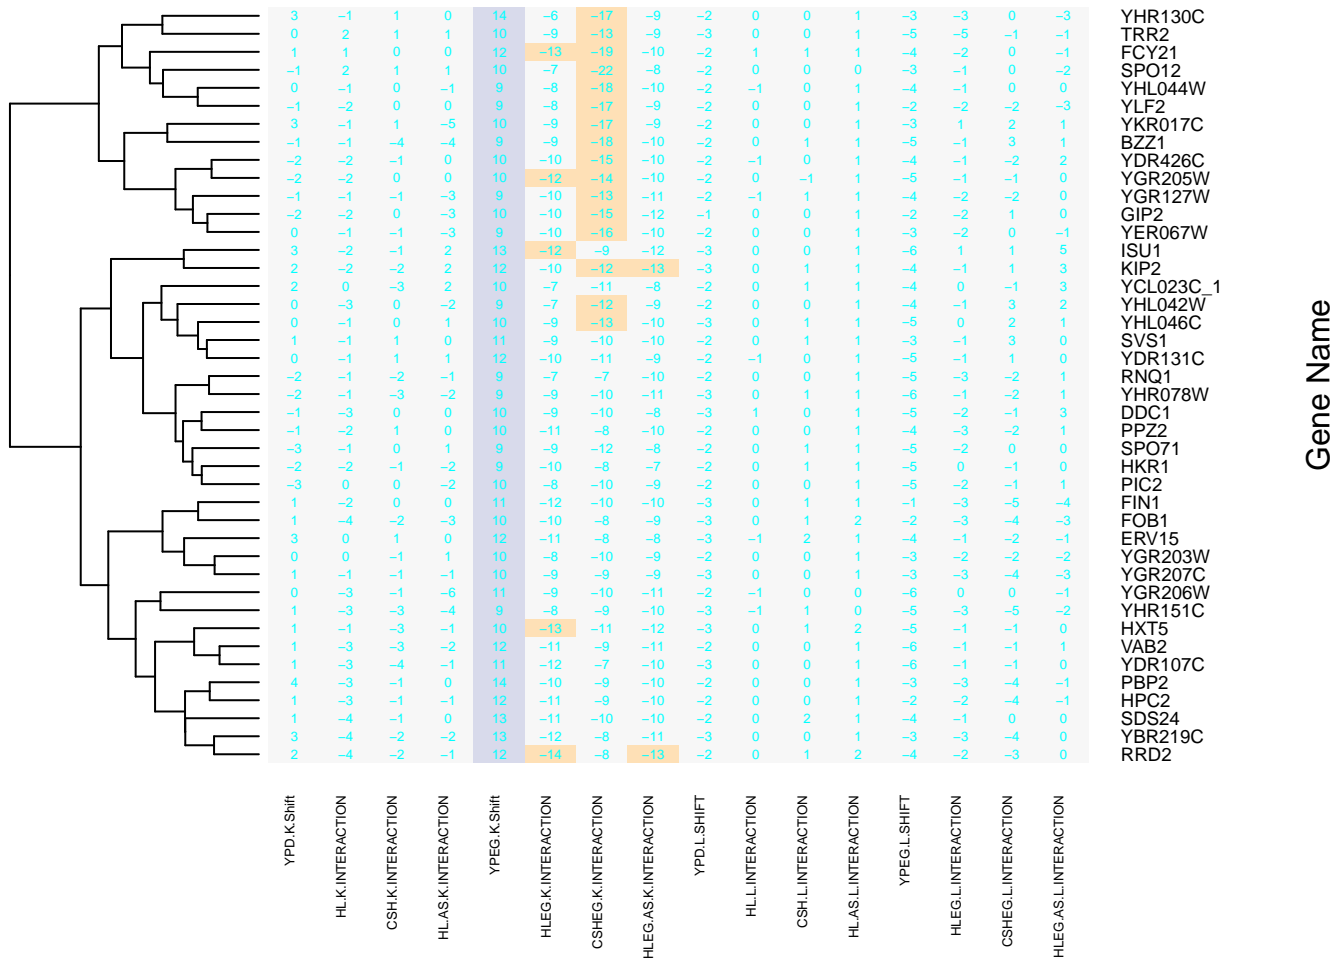

Color Key

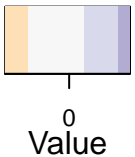

4-0.5.17.0-1

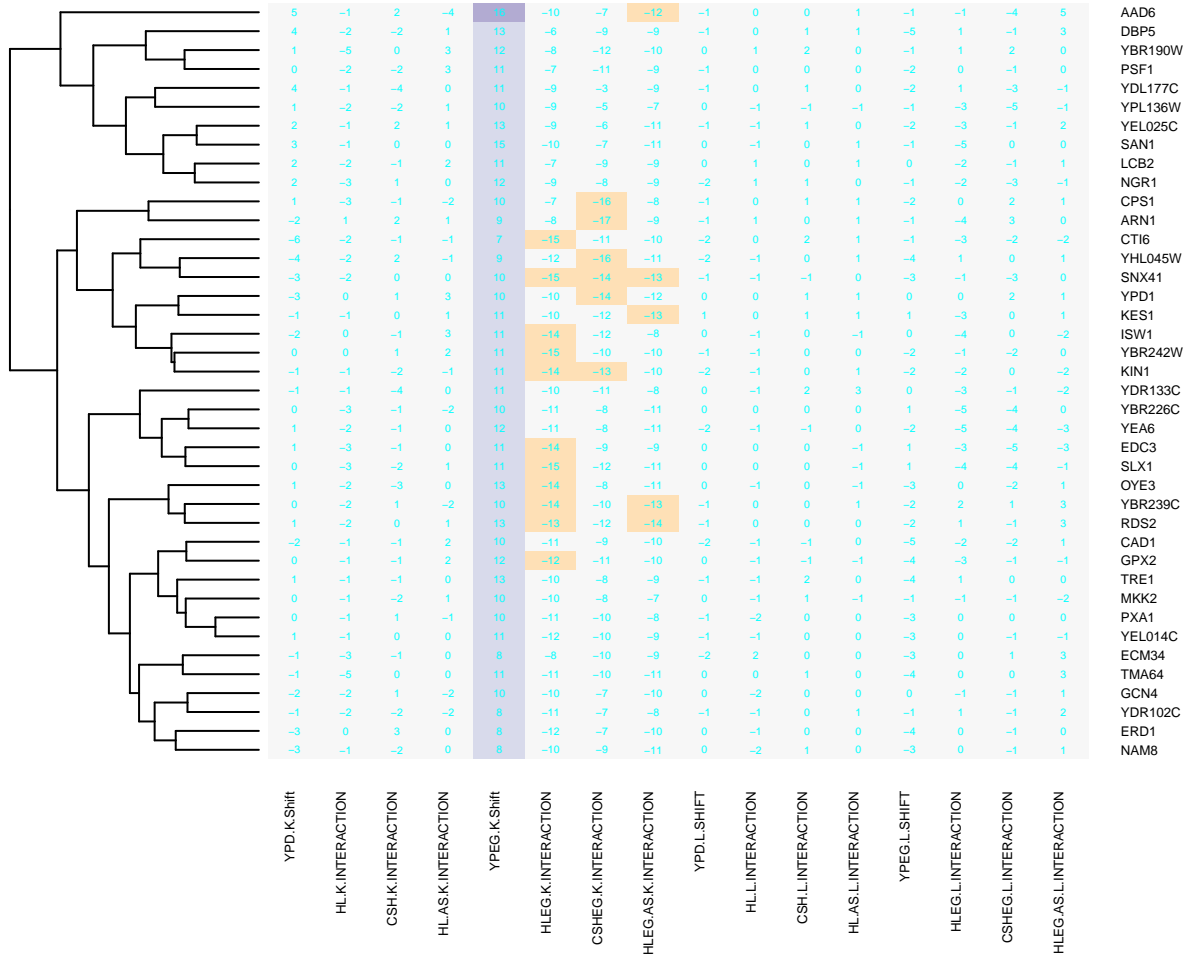

Type of Media

Color Key

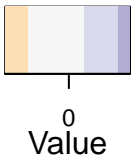

4-0.5.17.1-0

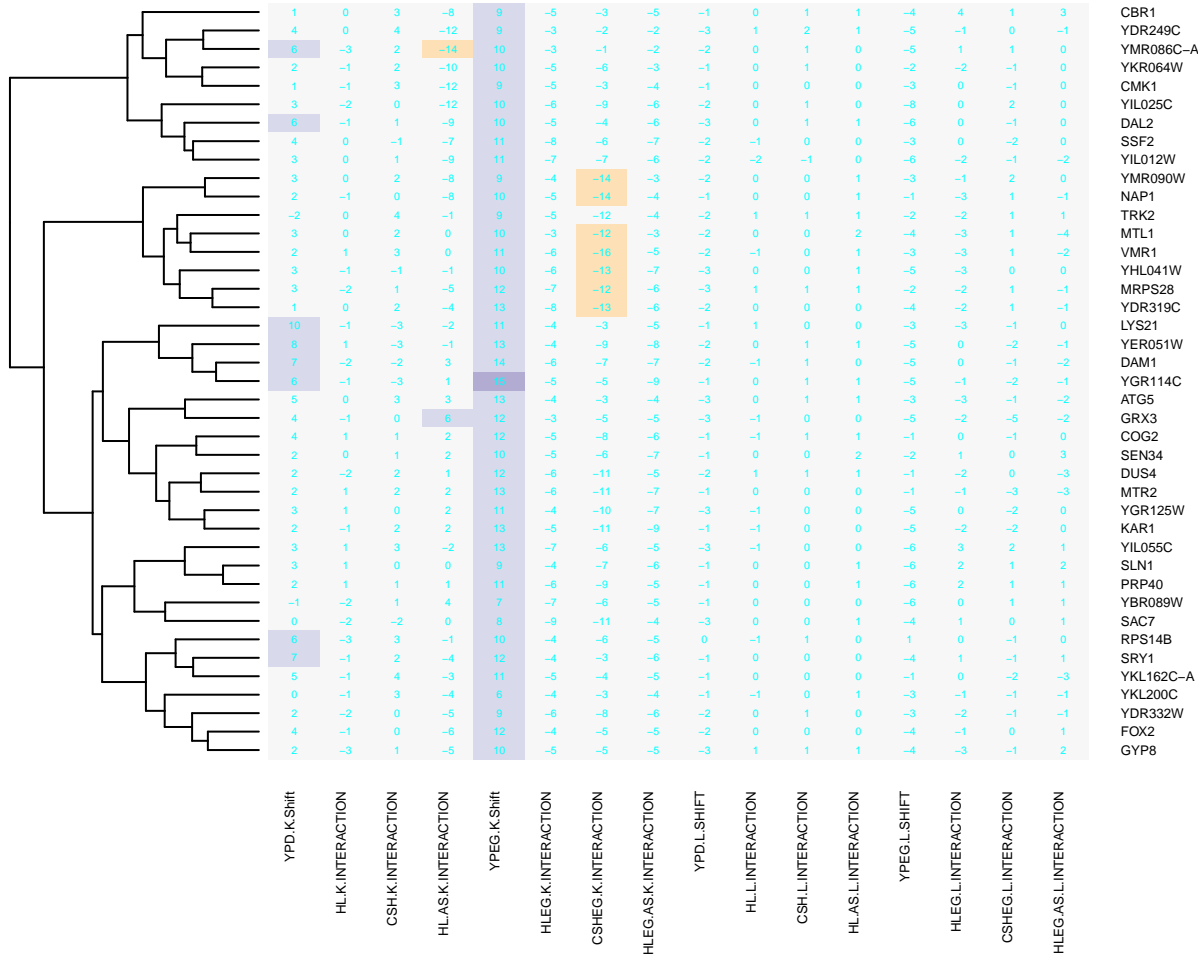

Gene Name

Type of Media

Color Key

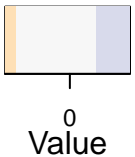

4-0.5.17.1-1

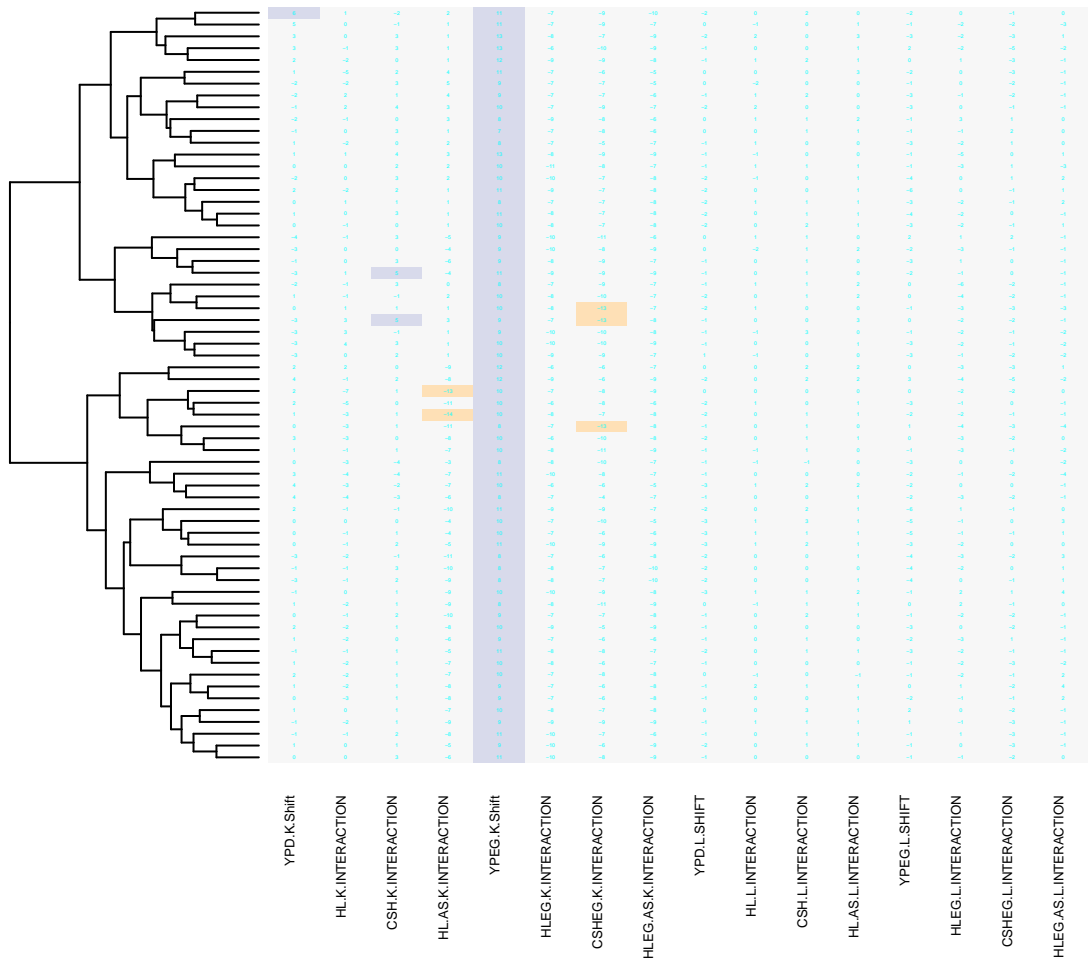

- KAR4
- HOR2
- YCK1
- SMD1
- NIC96
- COG9
- POL5
- RPN6
- YER071C
- AAR2
- GDA1
- YBR261C
- RUB1
- RGD1
- HHO1
- CUP9
- IAC17
- YDR112W
- YBR224W
- MSN5
- TVF15
- TRM2
- MCH2
- SHG1
- YEL047C
- YER084W
- PEX4
- YER088C-A
- CTM1
- KAP120
- YCR016W
- YFL054C
- INP51
- YKR005C
- YFL019C
- UTH1
- YOD1
- PAU5
- YGL231C
- YMR194G-A
- KAR5
- YDL206W
- TR3
- NAT4
- YKR075C
- ECM4
- PRR1
- YLD69C
- YIR042C
- YDR336W
- YMR087W
- SUN1
- ASP1
- ECM40
- MCH21
- MTD1
- OSH6
- YLD32C
- UBX5
- YMR086W
- YKR070W
- YKR032W
- YKR018C
- YKL222C

Gene Name

Type of Media

○

**4-0.5.17.1-2**

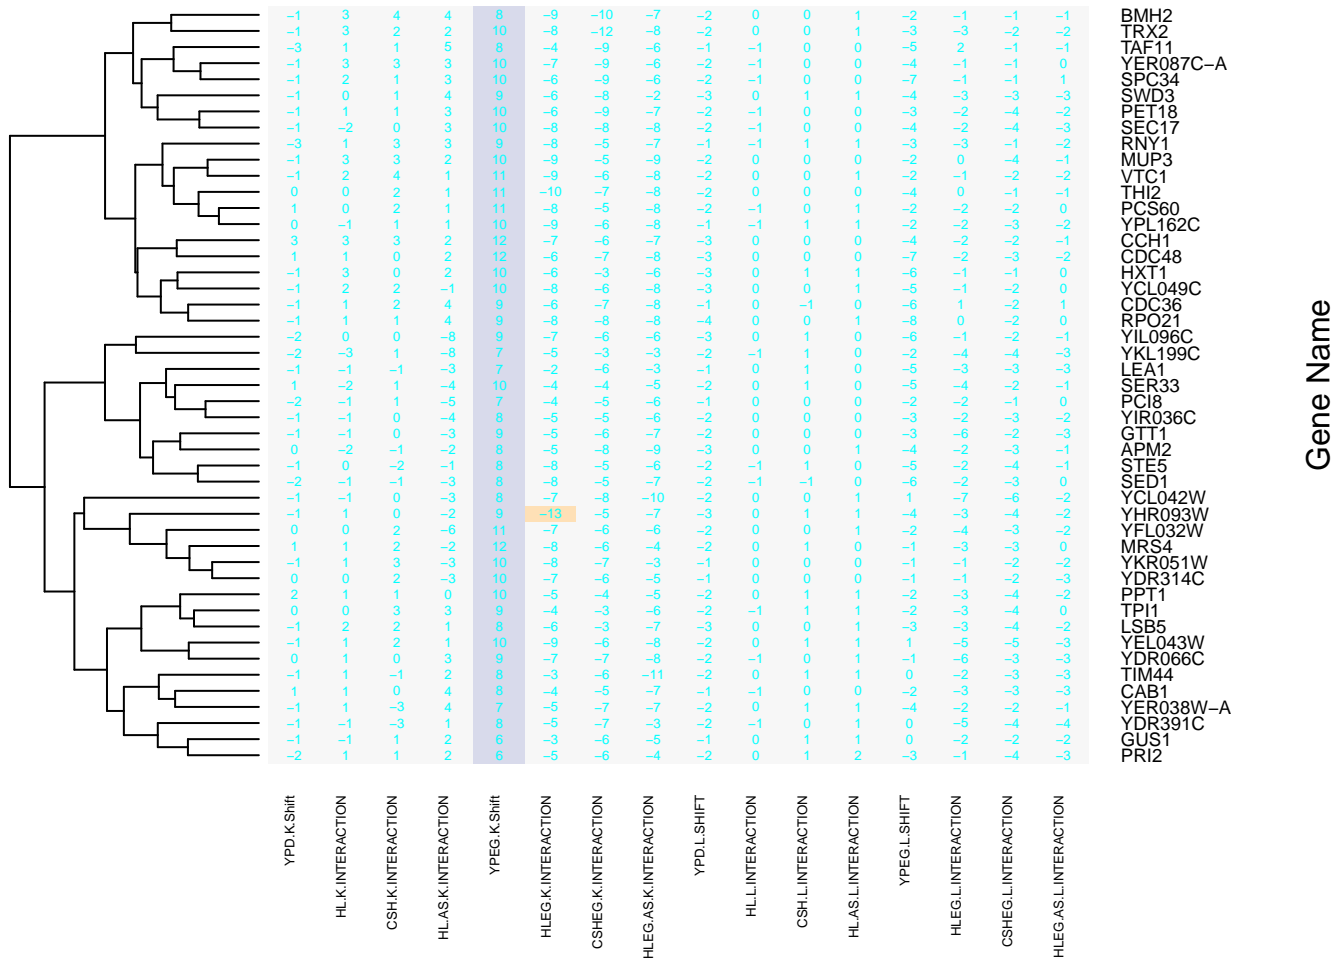

## Type of Media

Color Key

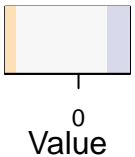

4-0.5.18.1-0

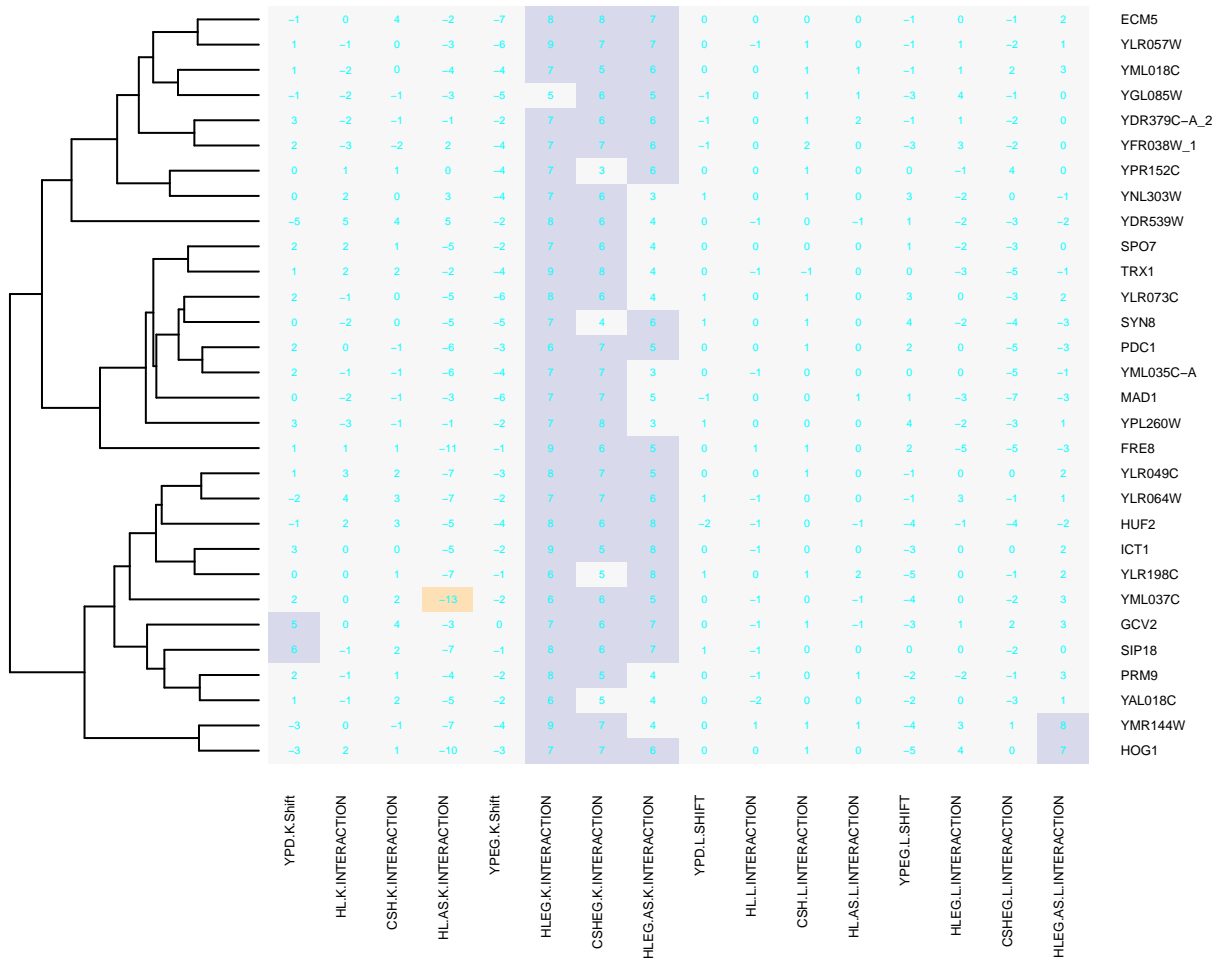

Gene Name

Type of Media

Color Key

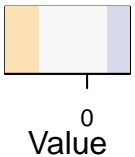

4-0.5.18.1-1

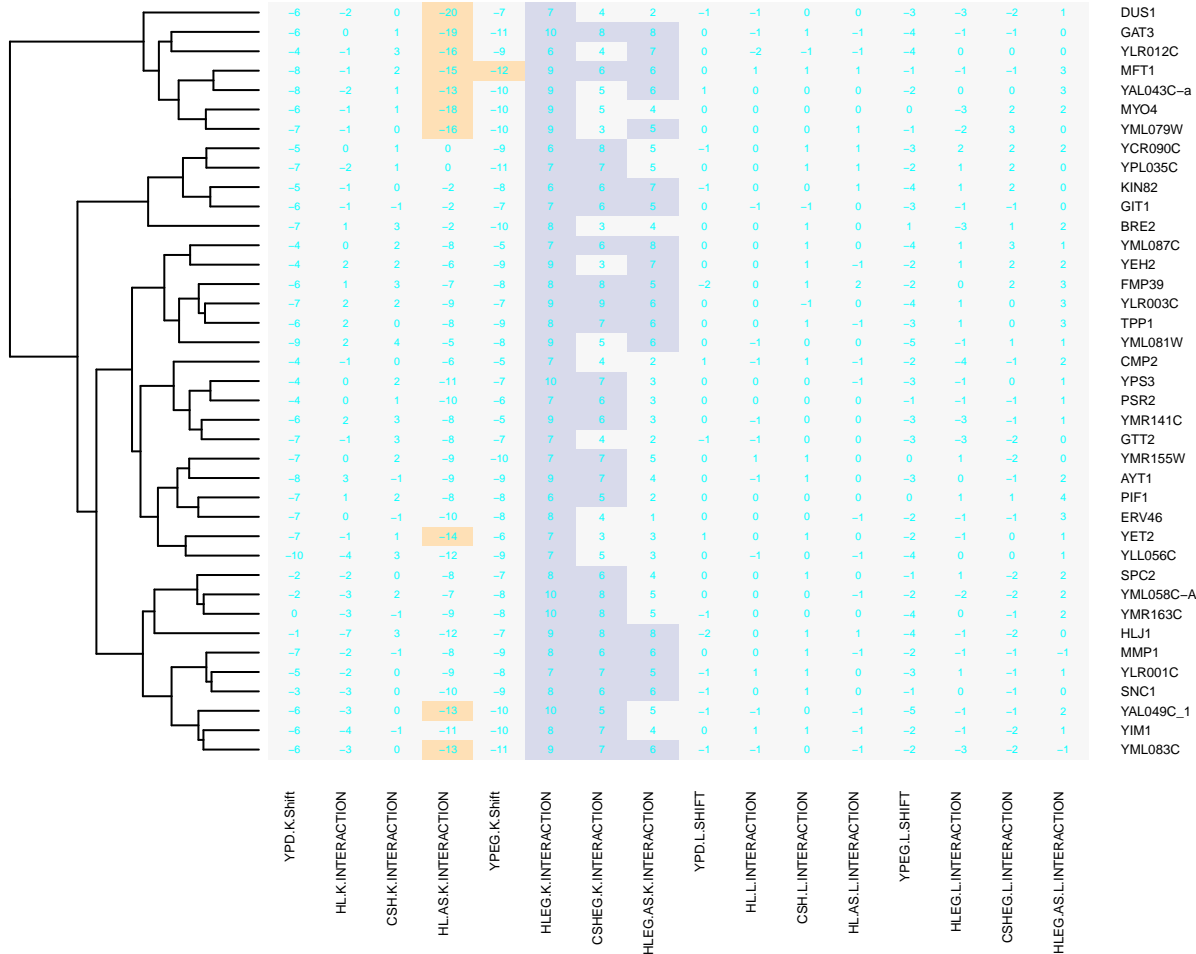

Gene Name

Type of Media

Color Key

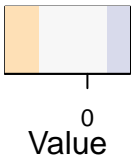

4-0.5.18.1-2

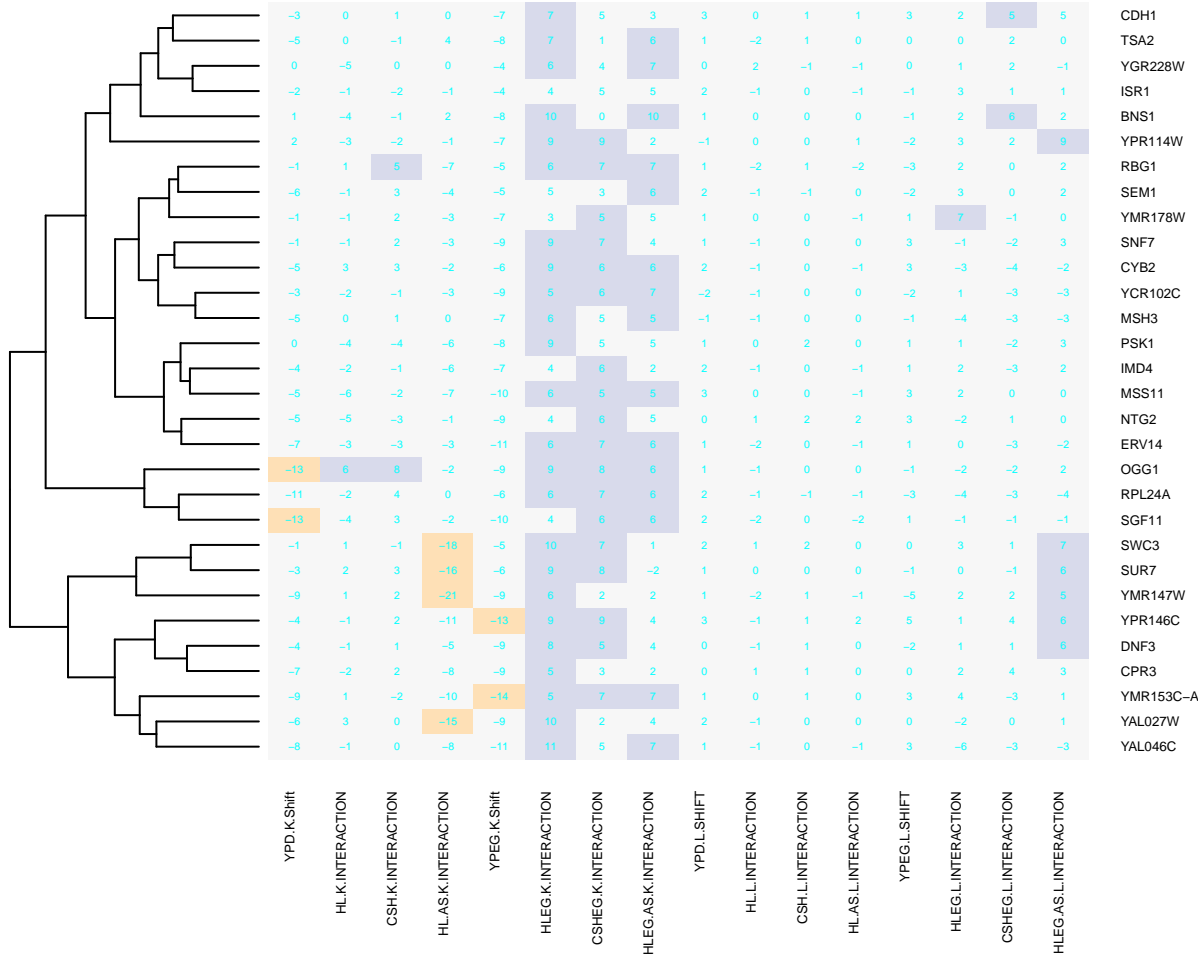

Color Key

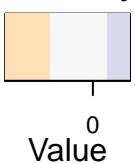

4-0.5.19.0-0

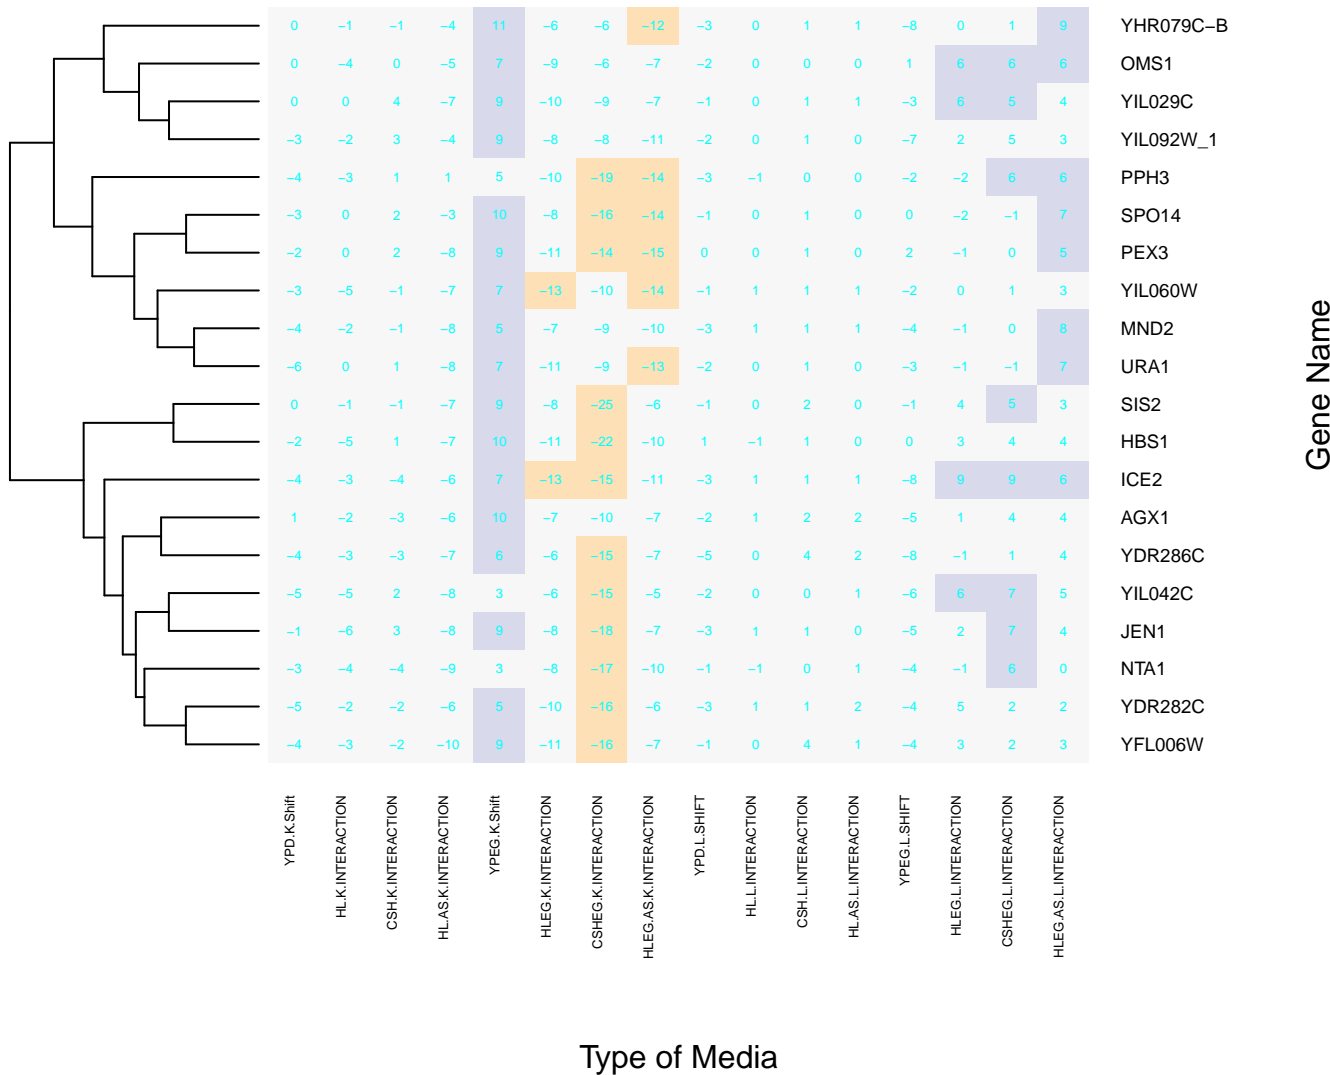

Color Key

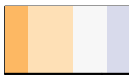

0  
Value

4-0.5.19.0-1

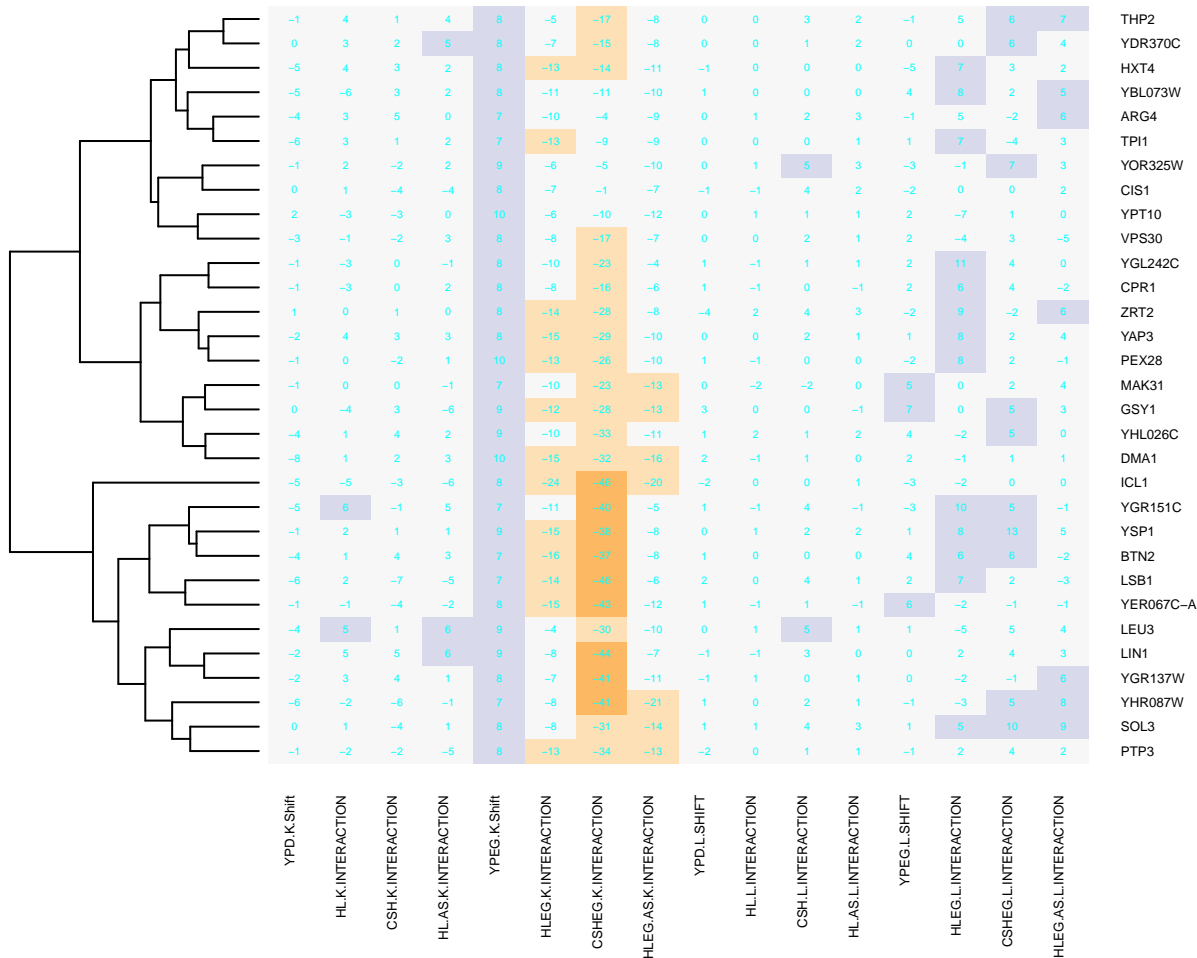

Gene Name

Type of Media

Color Key

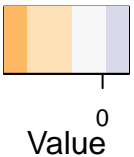

4-0.5.19.0-2

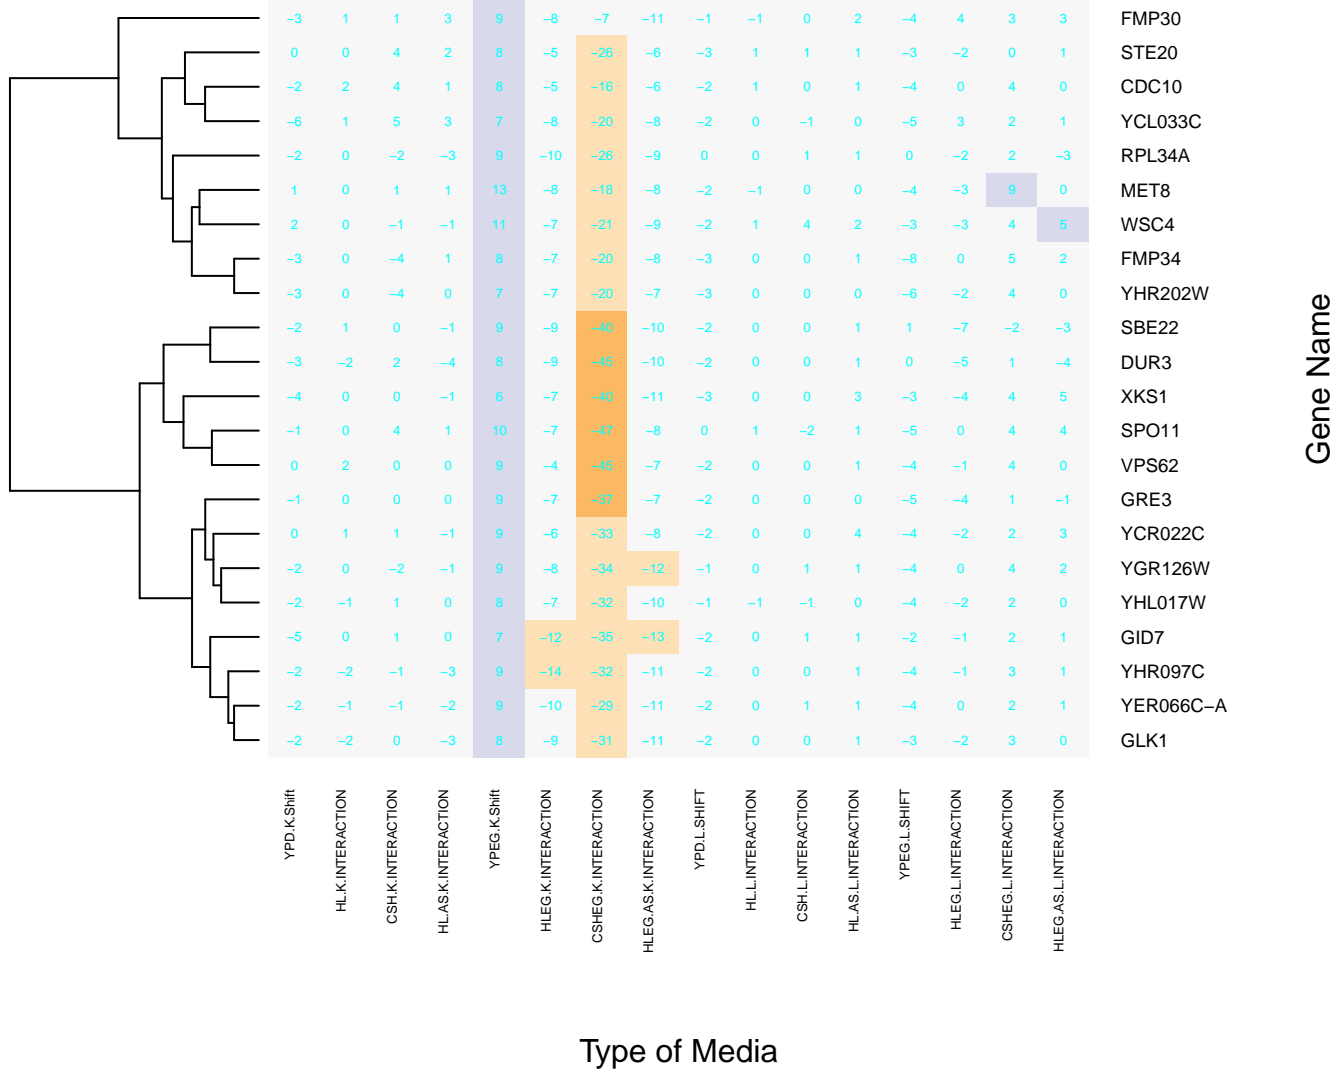

Color Key

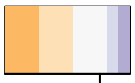

0  
Value

4-0.5.20.1-0

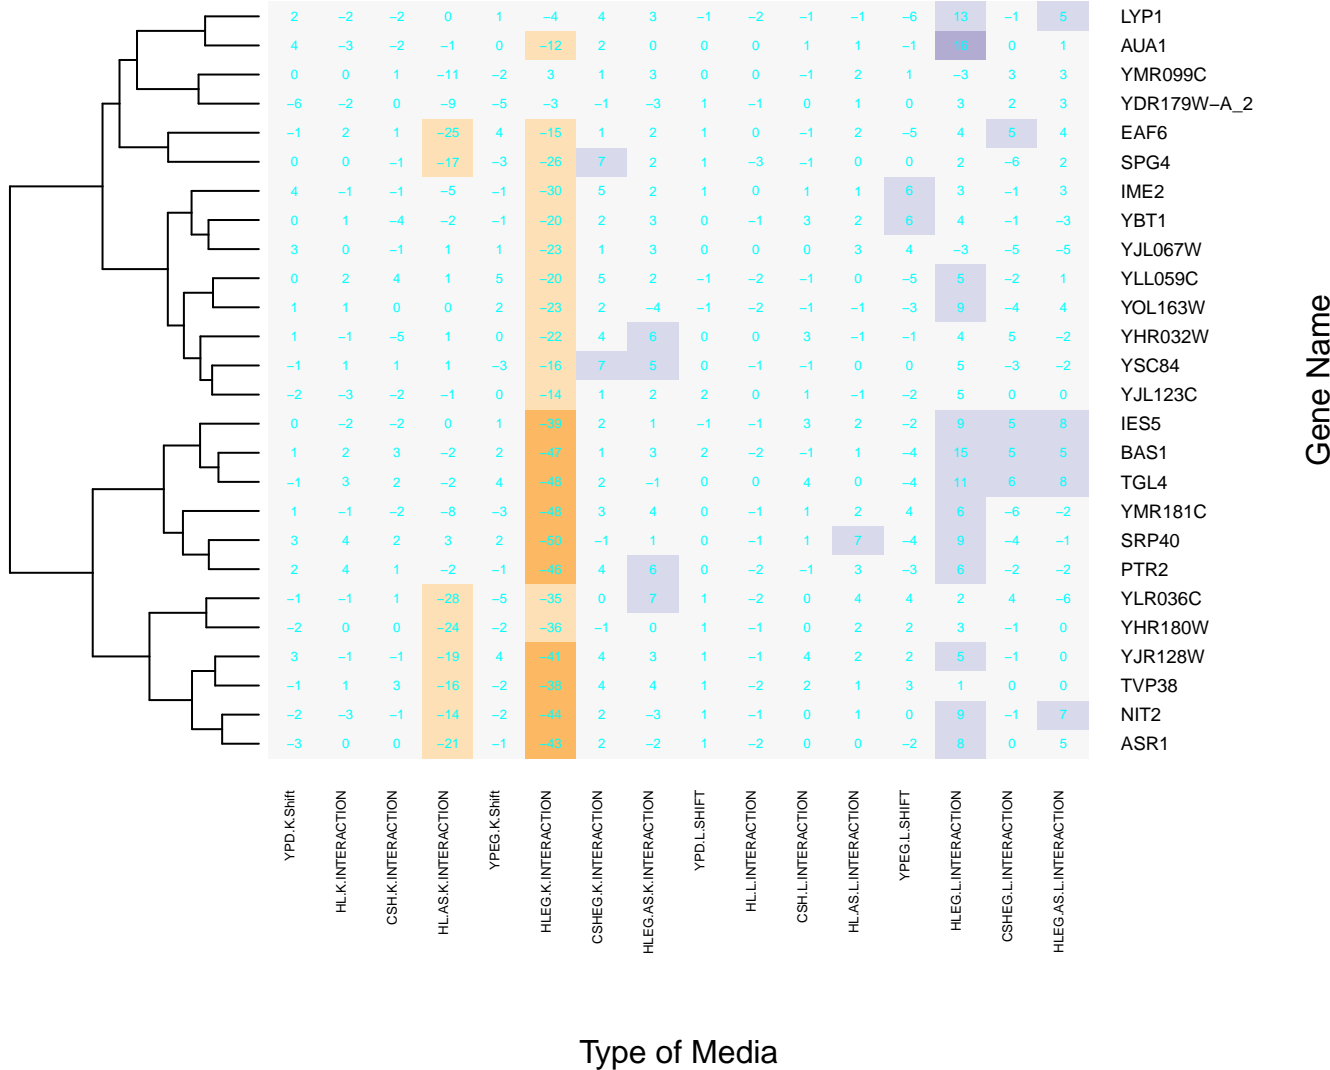

Color Key

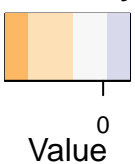

4-0.5.20.1-1

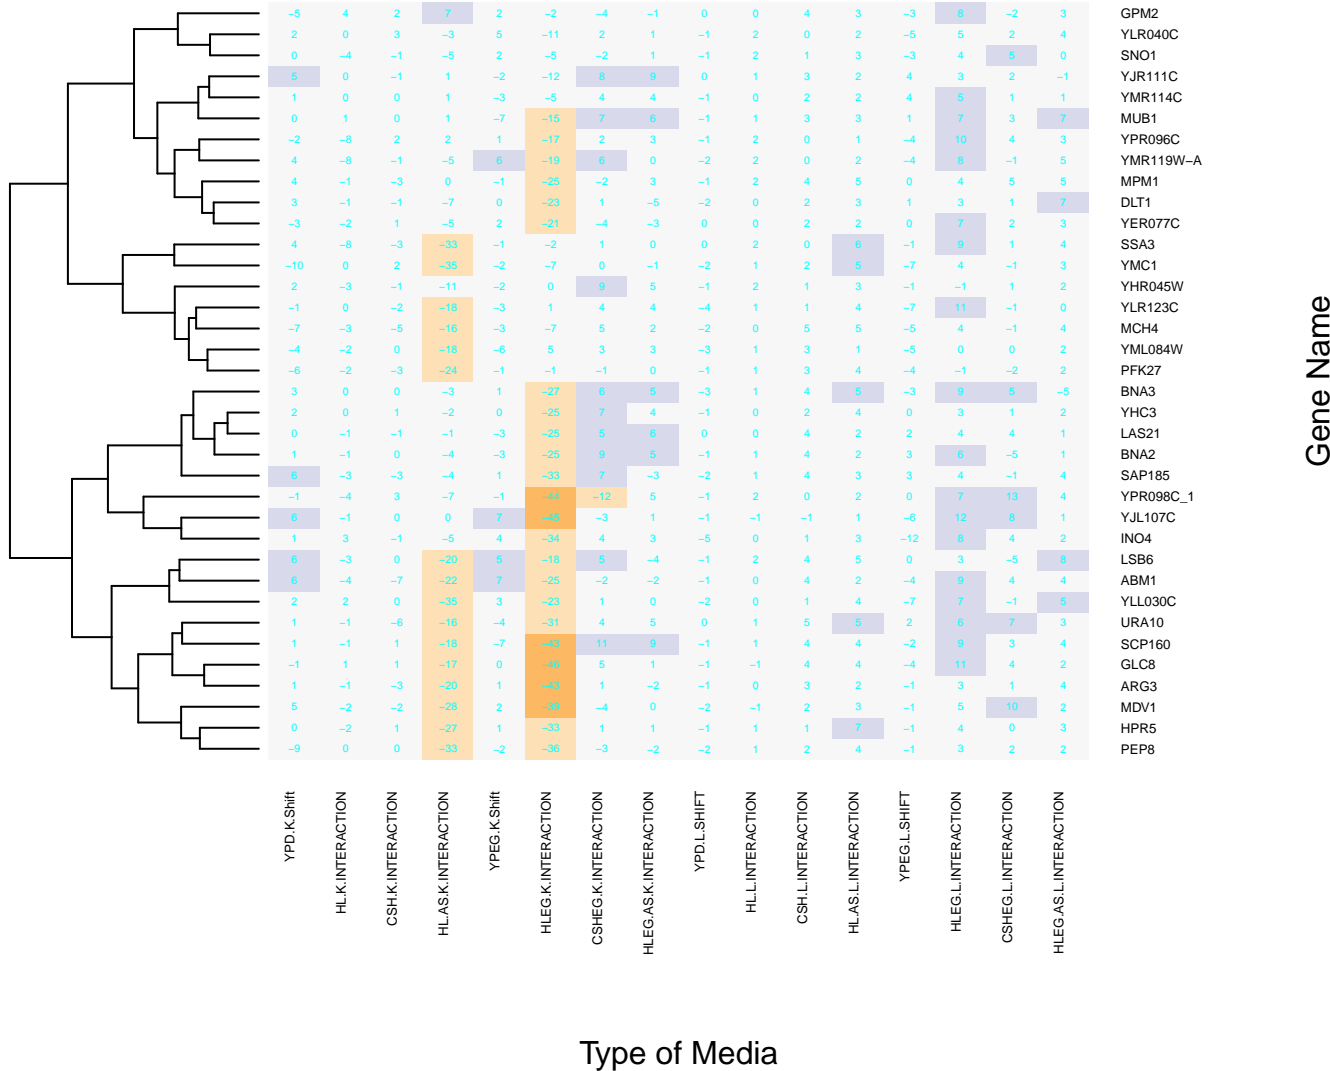

Color Key

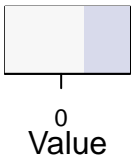

4-0.5.25.1-0

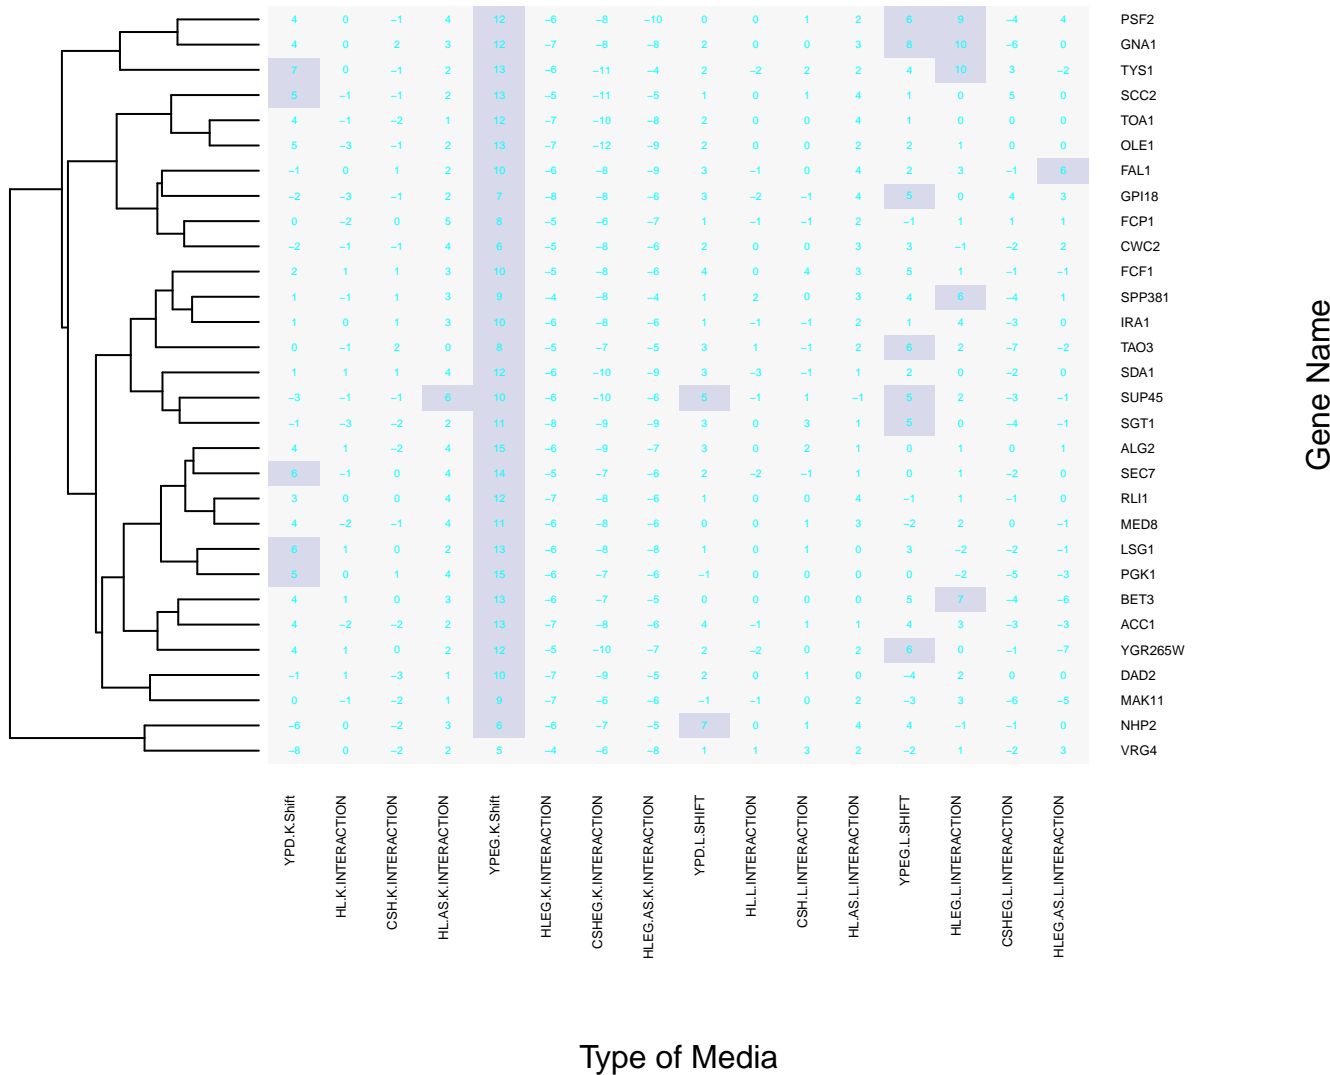

Color Key

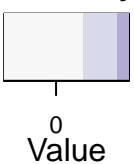

4-0.5.25.1-1

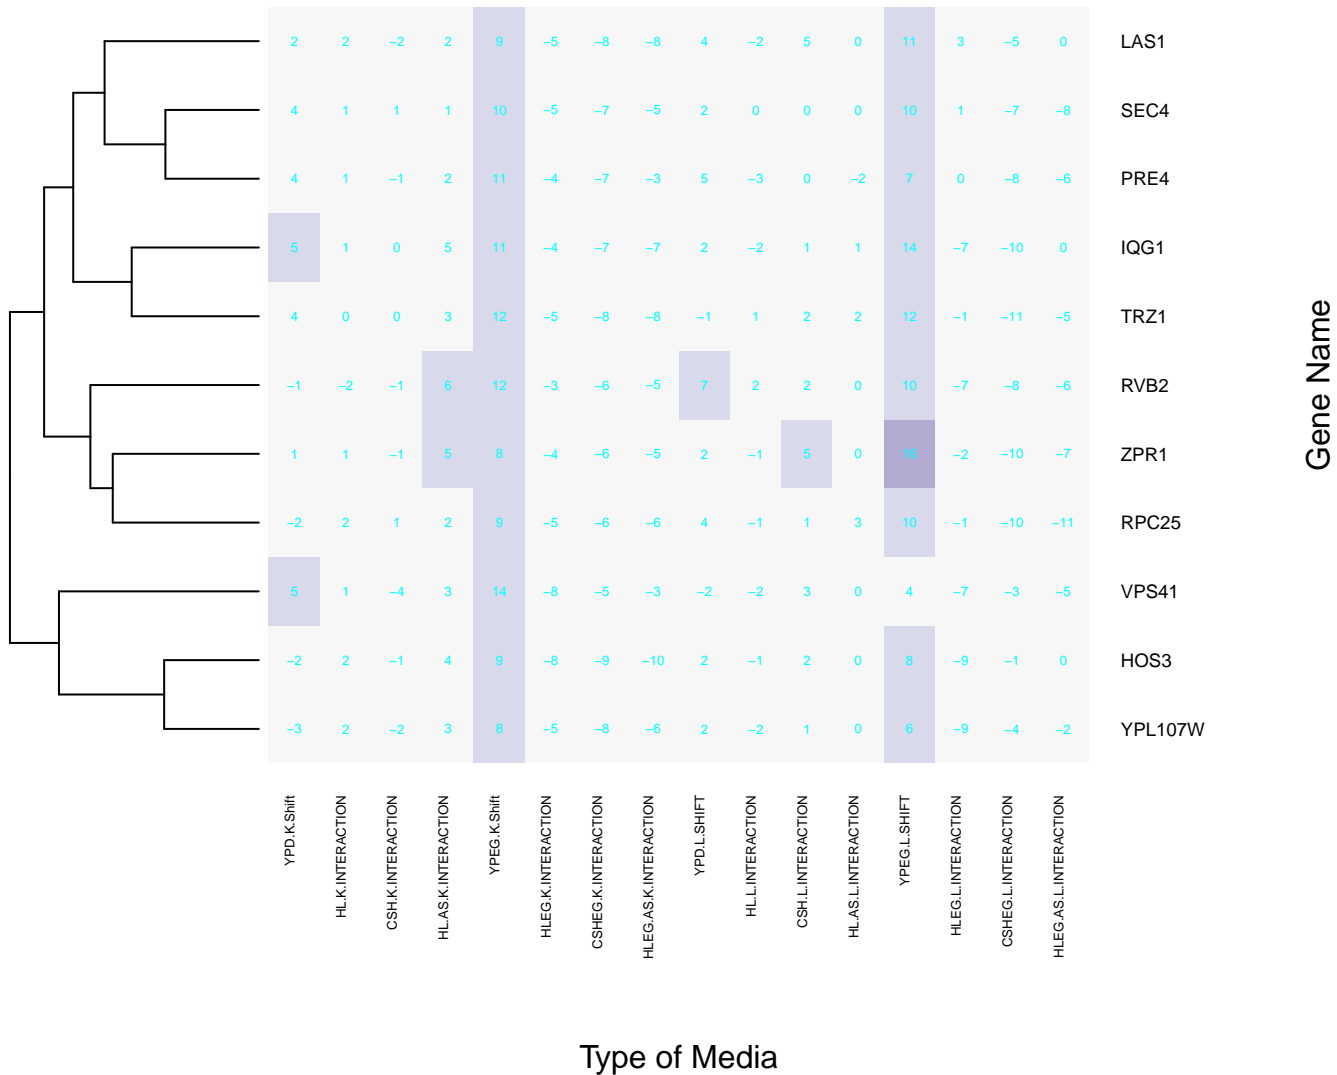

Color Key

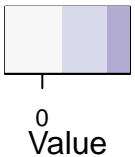

4-0.5.4.1-0

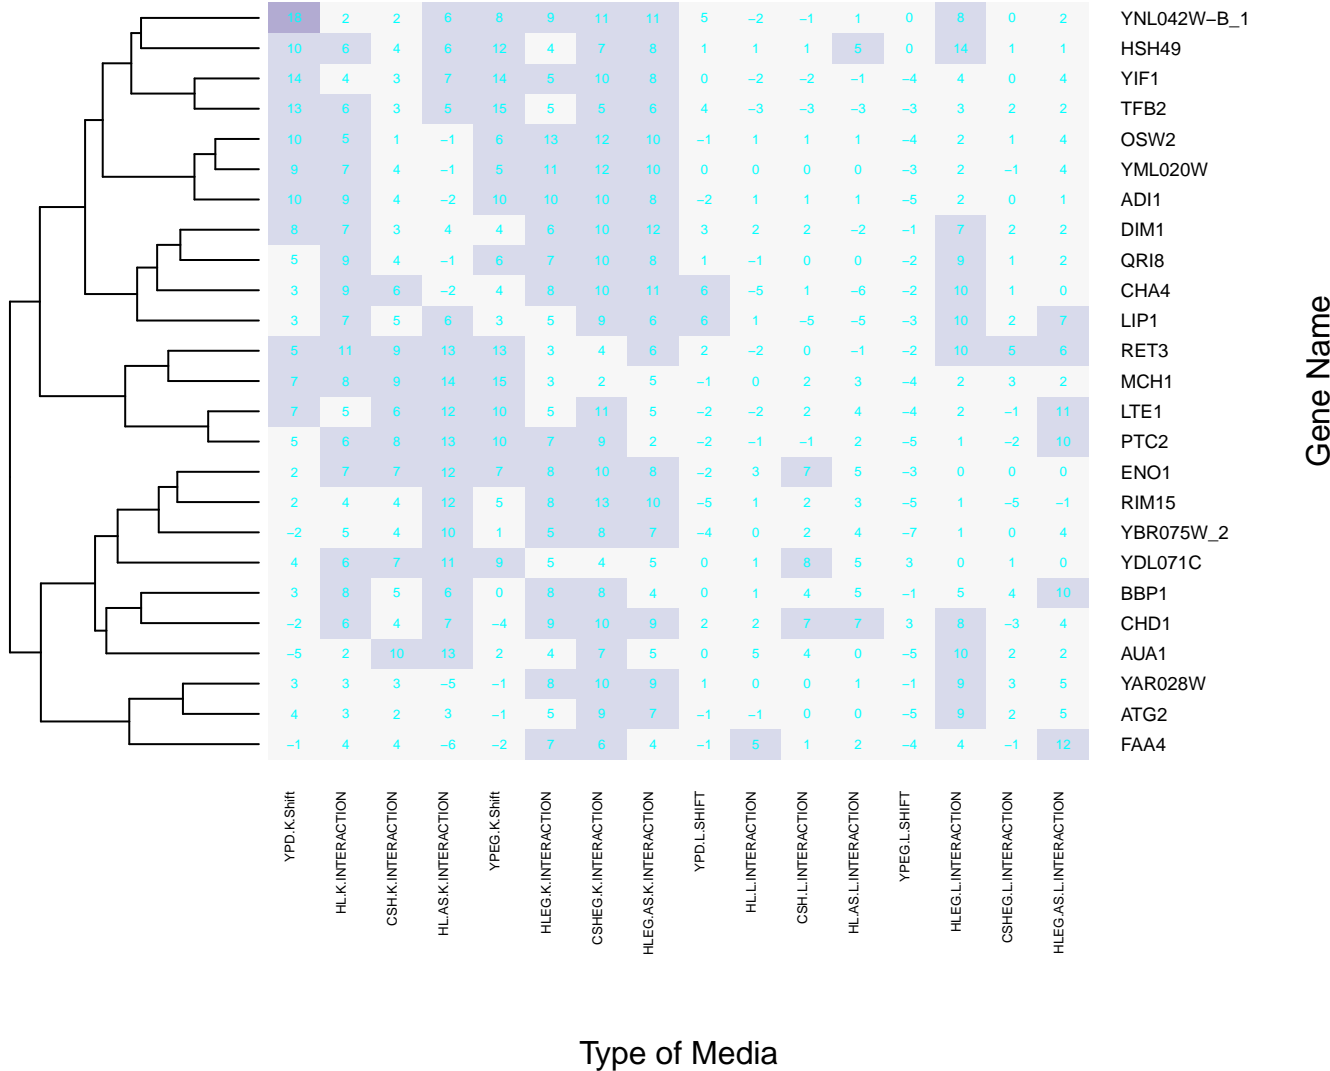

Color Key



4-0.5.4.1-1

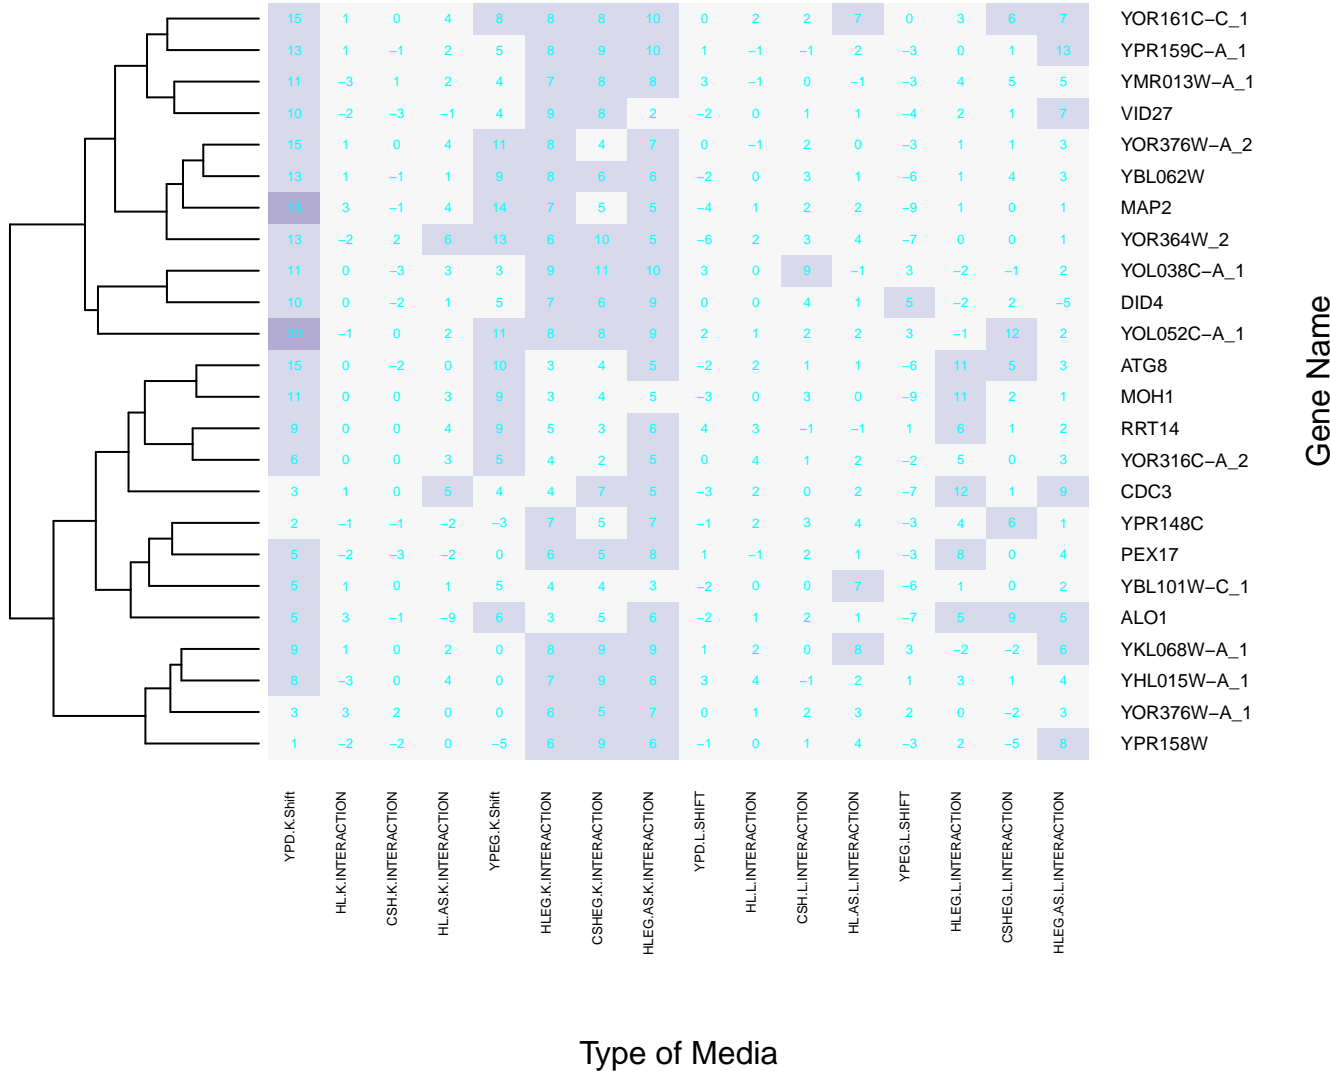

Color Key

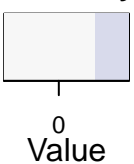

4-0.5.5.1-0

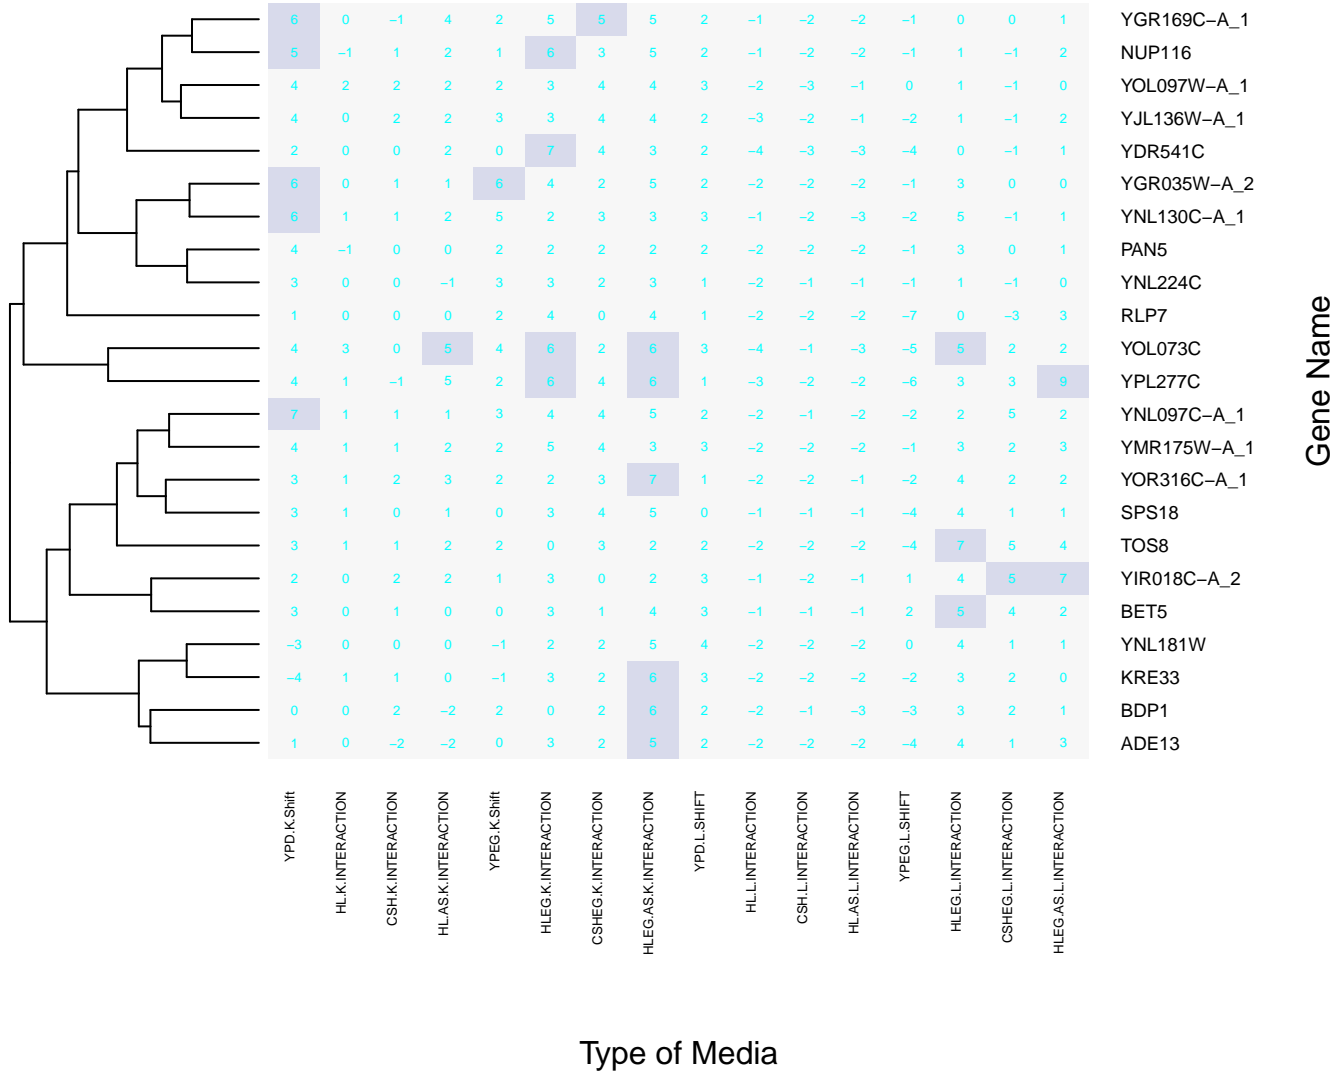

Color Key

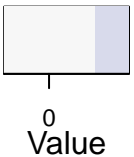

4-0.5.5.1-1

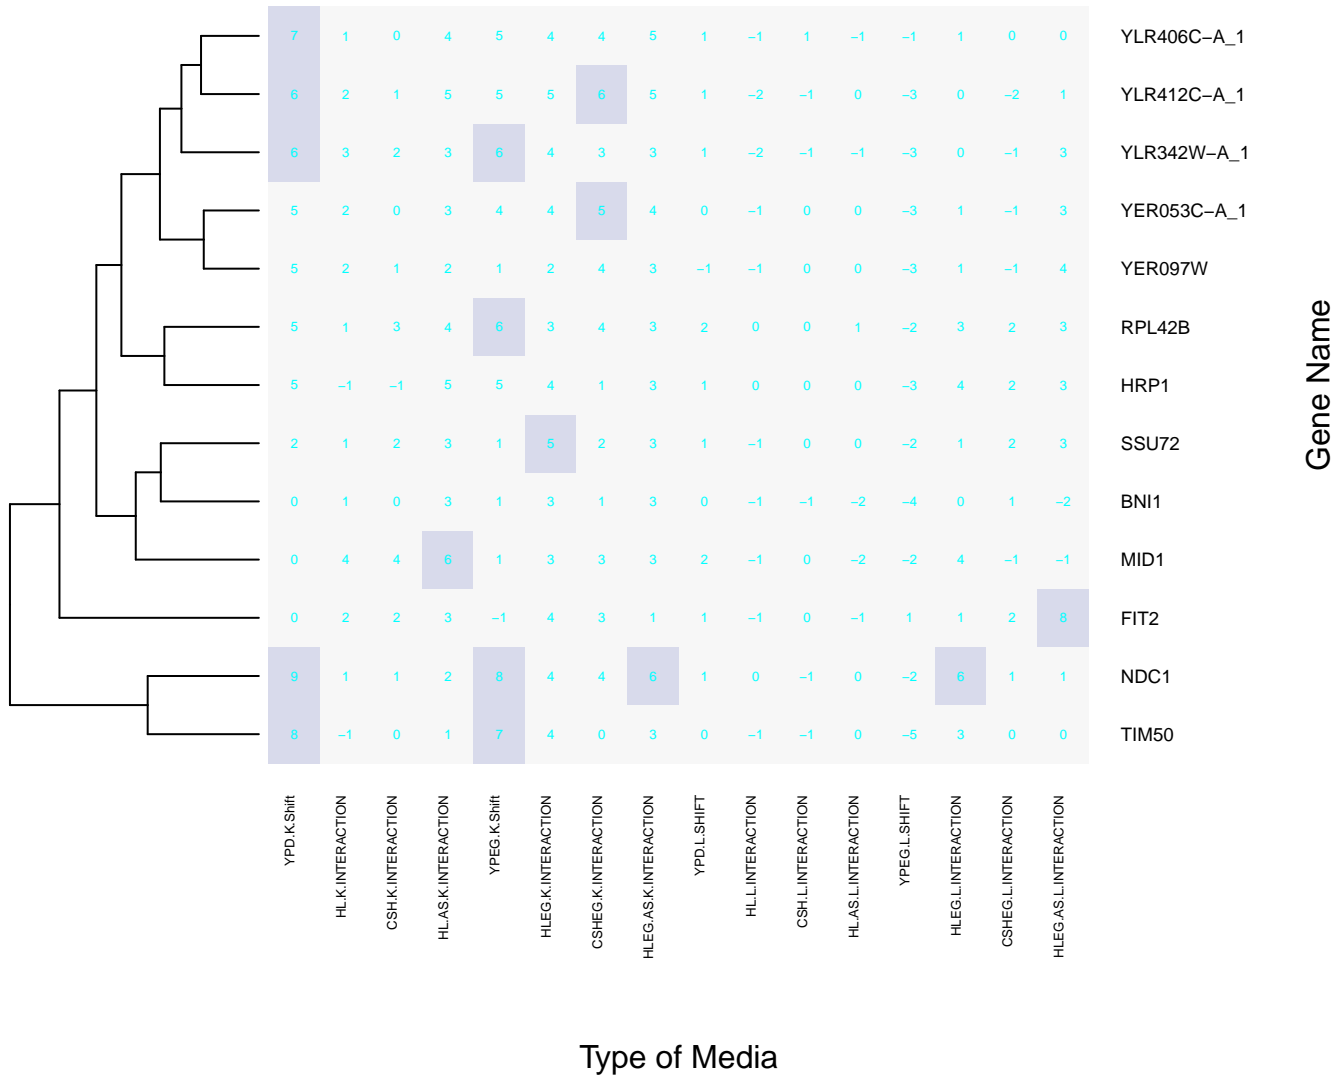

Color Key

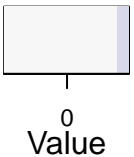

4-0.5.6.1-0

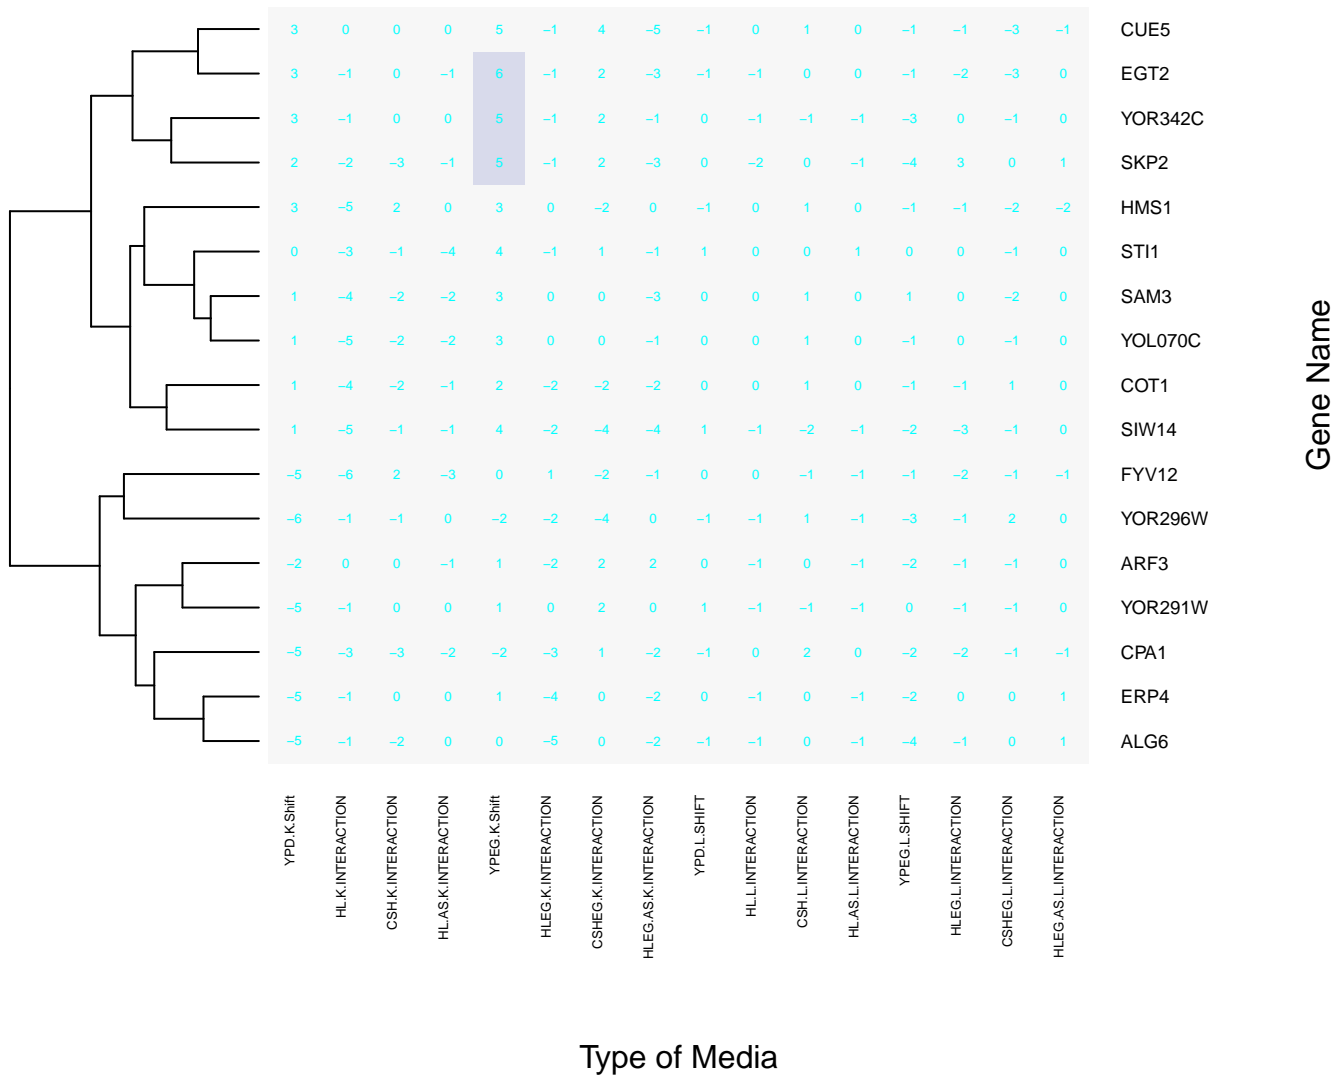

Color Key

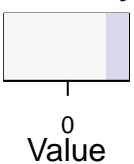

4-0.5.6.1-1

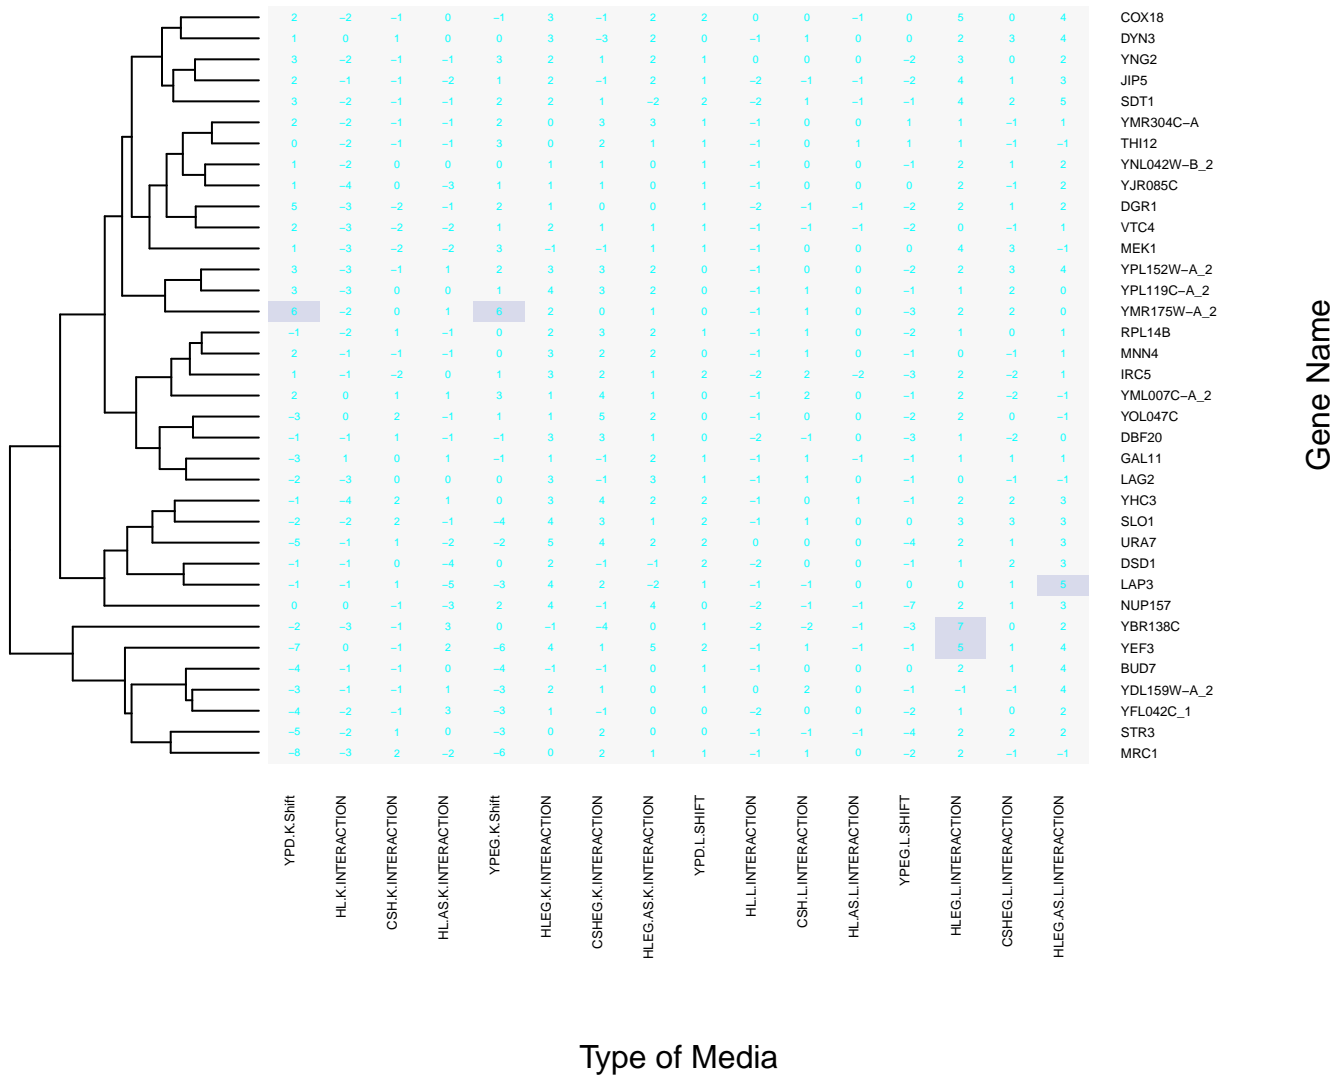

Color Key

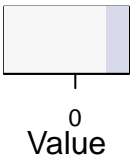

4-0.5.6.1-2

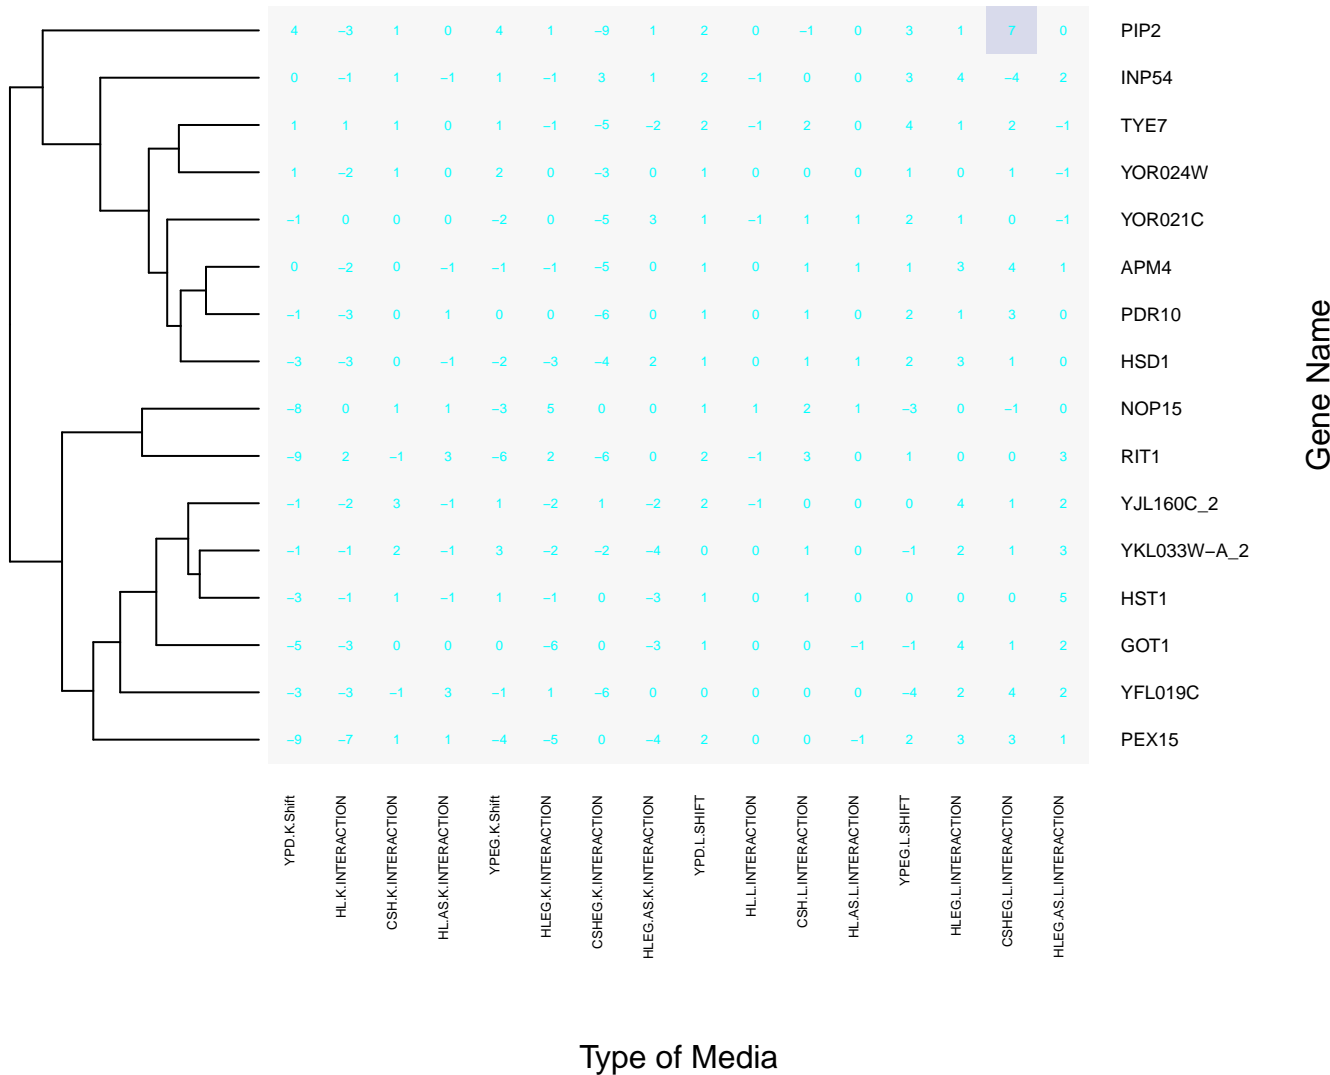

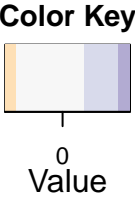

4-0.5.7.0-0

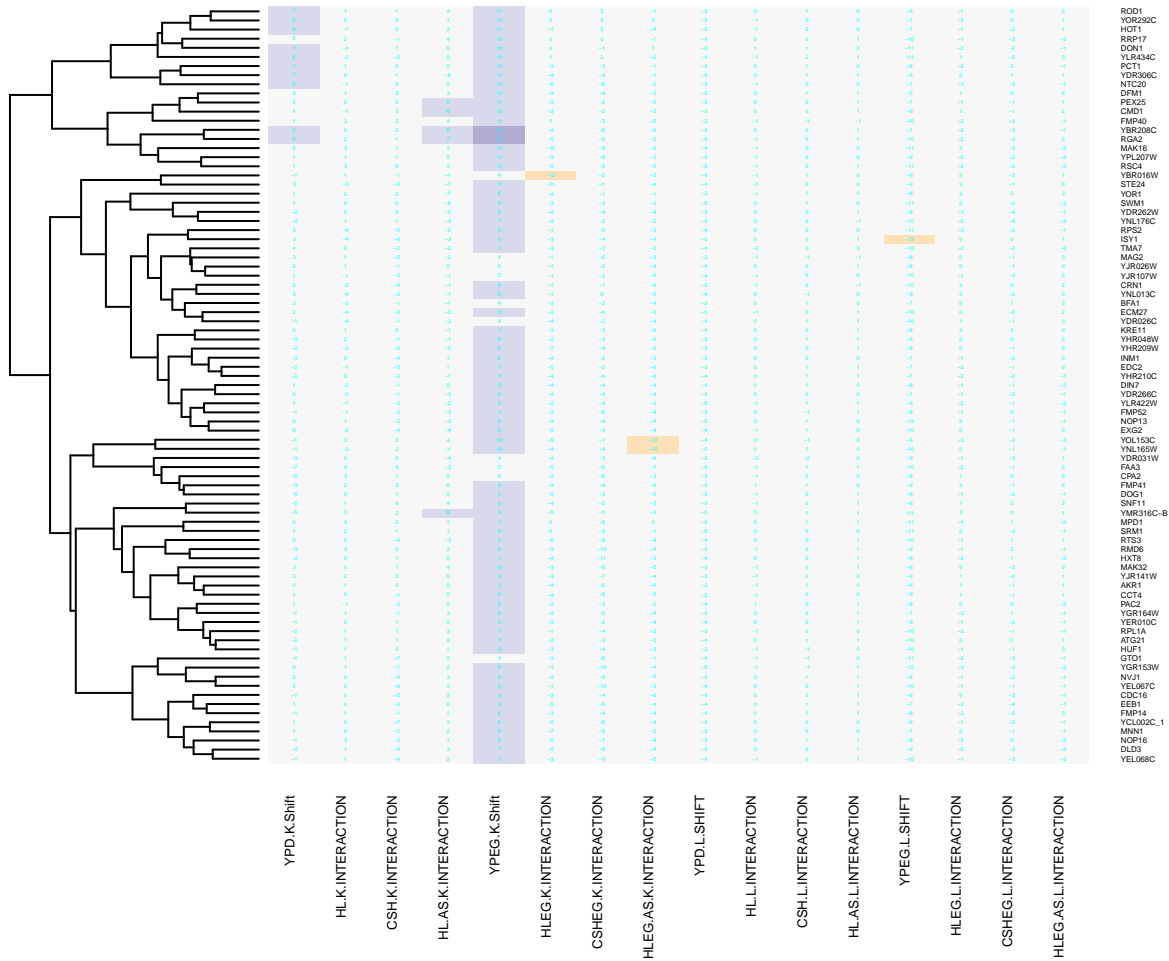

Color Key

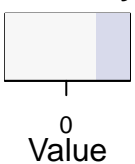

4-0.5.7.0-1

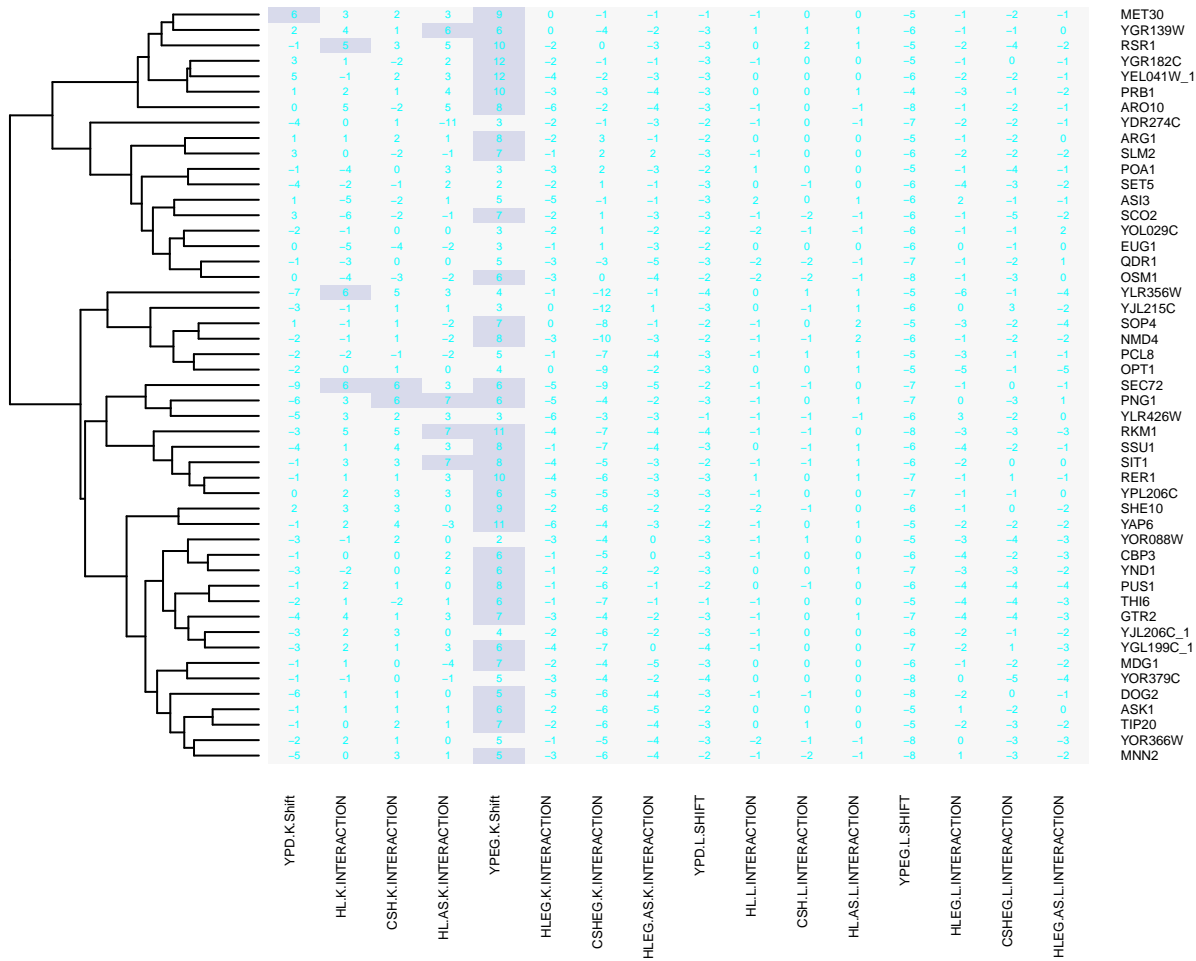

Gene Name

Type of Media

Color Key

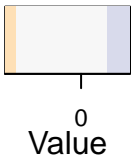

4-0.5.7.1-0

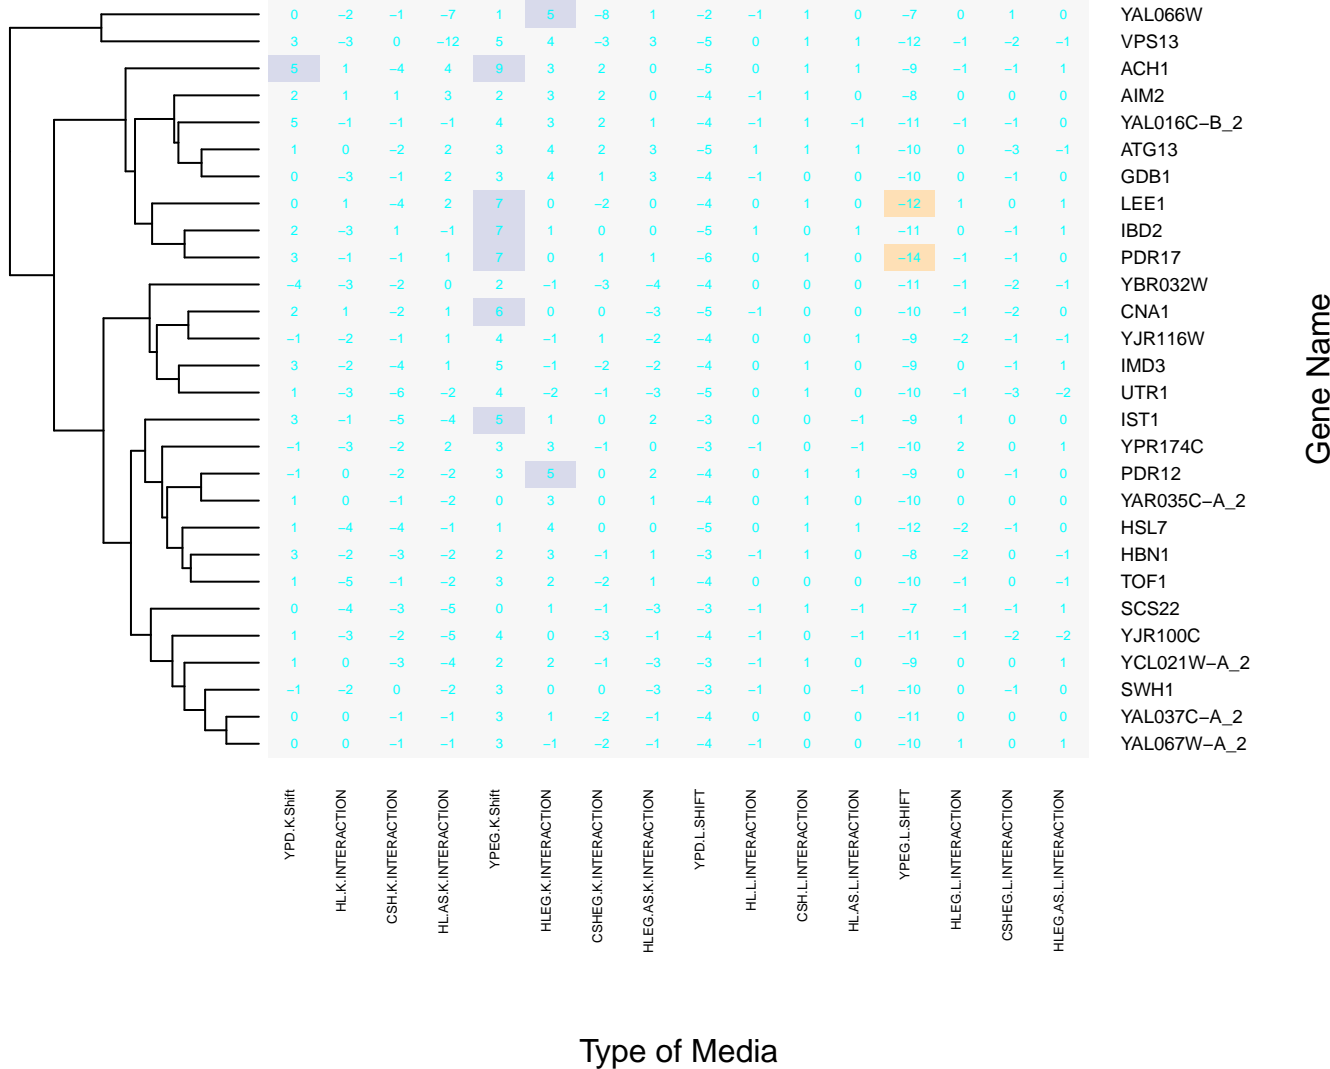

Color Key

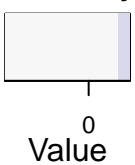

4-0.5.7.1-1

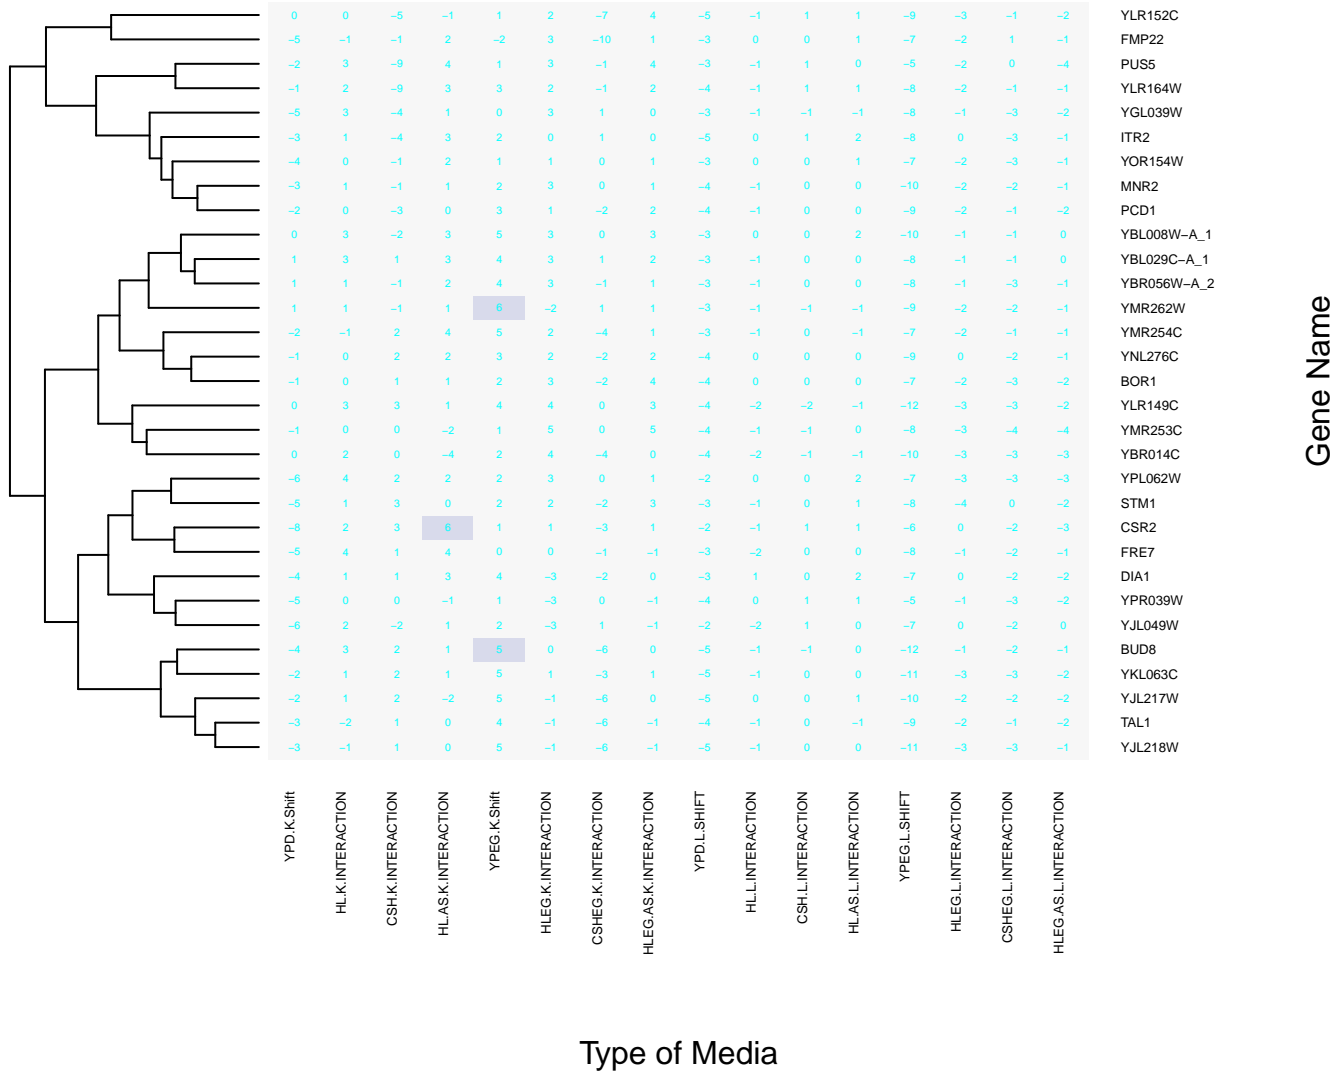

Color Key

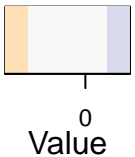

4-0.5.7.1-2

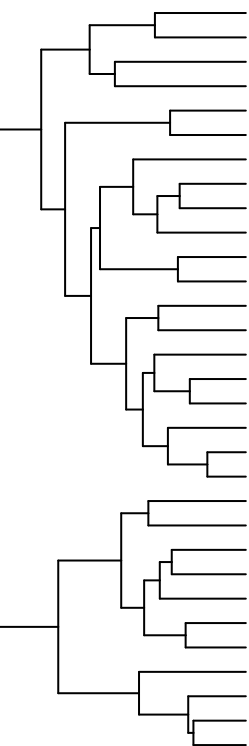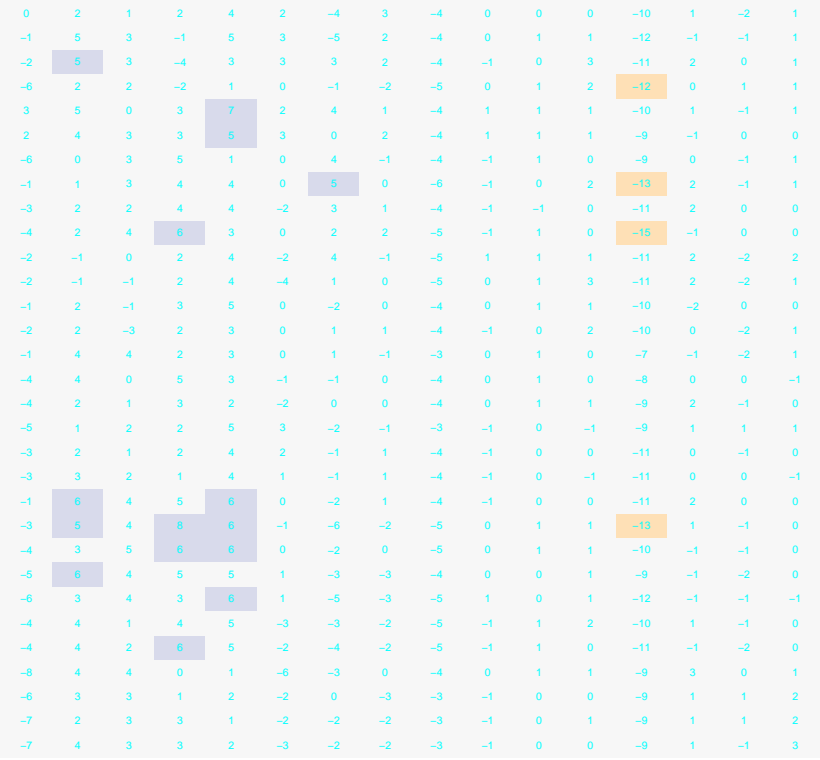

- PSE1
- ATM1
- AQY2
- HOP2
- YBL036C
- YAR035C-A\_1
- YJL045W
- YNL300W
- YOL107W
- RPS12
- YOL106W
- NDJ1
- BSP1
- YMR320W
- YER186W-A\_1
- ADH6
- IZH4
- YPR172W
- MRP2
- CWC27
- YAL067W-A\_1
- HMI1
- YAL044W-A\_1
- FRM2
- DAN3
- YMR317W
- YOL098C
- YJL055W
- HTA2
- SRO7
- UBX6

Gene Name

- YPD\_K.Shift
- HLK.INTERACTION
- CSH.K.INTERACTION
- HLAS.K.INTERACTION
- YPEG\_K.Shift
- HLEG.K.INTERACTION
- CSHEG.K.INTERACTION
- HLEG.AS.K.INTERACTION
- YPD.L.Shift
- HLL.INTERACTION
- CSH.L.INTERACTION
- HLAS.L.INTERACTION
- YPEG.L.Shift
- HLEG.L.INTERACTION
- CSHEG.L.INTERACTION
- HLEG.AS.L.INTERACTION

Type of Media

Color Key

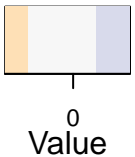

4-0.5.9.2-0

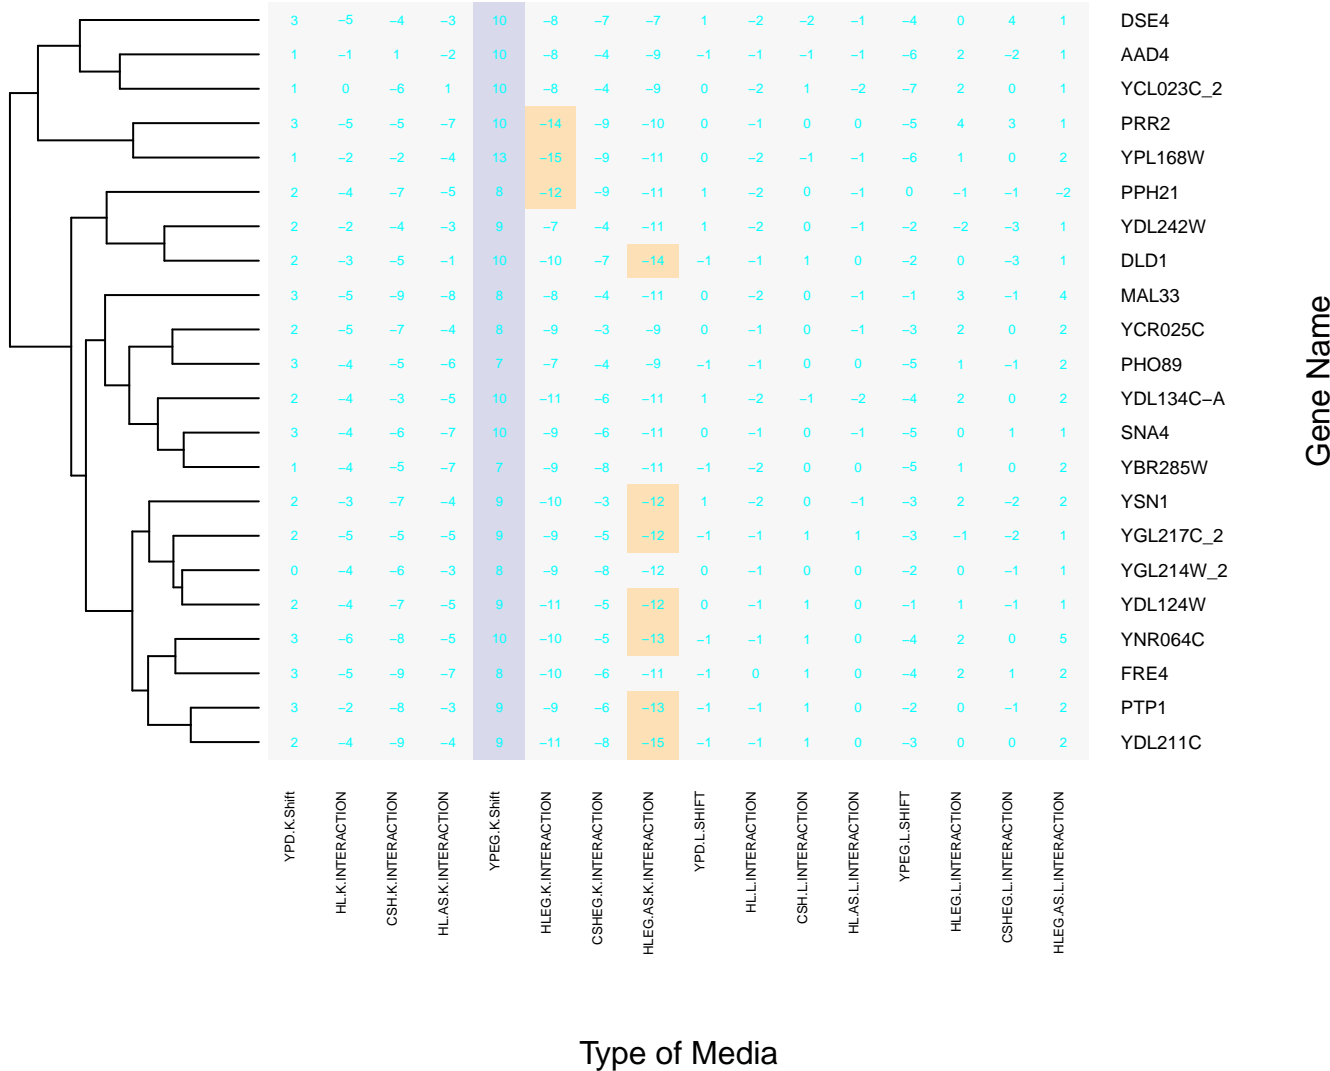

Color Key

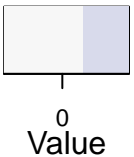

4-0.5.9.2-1

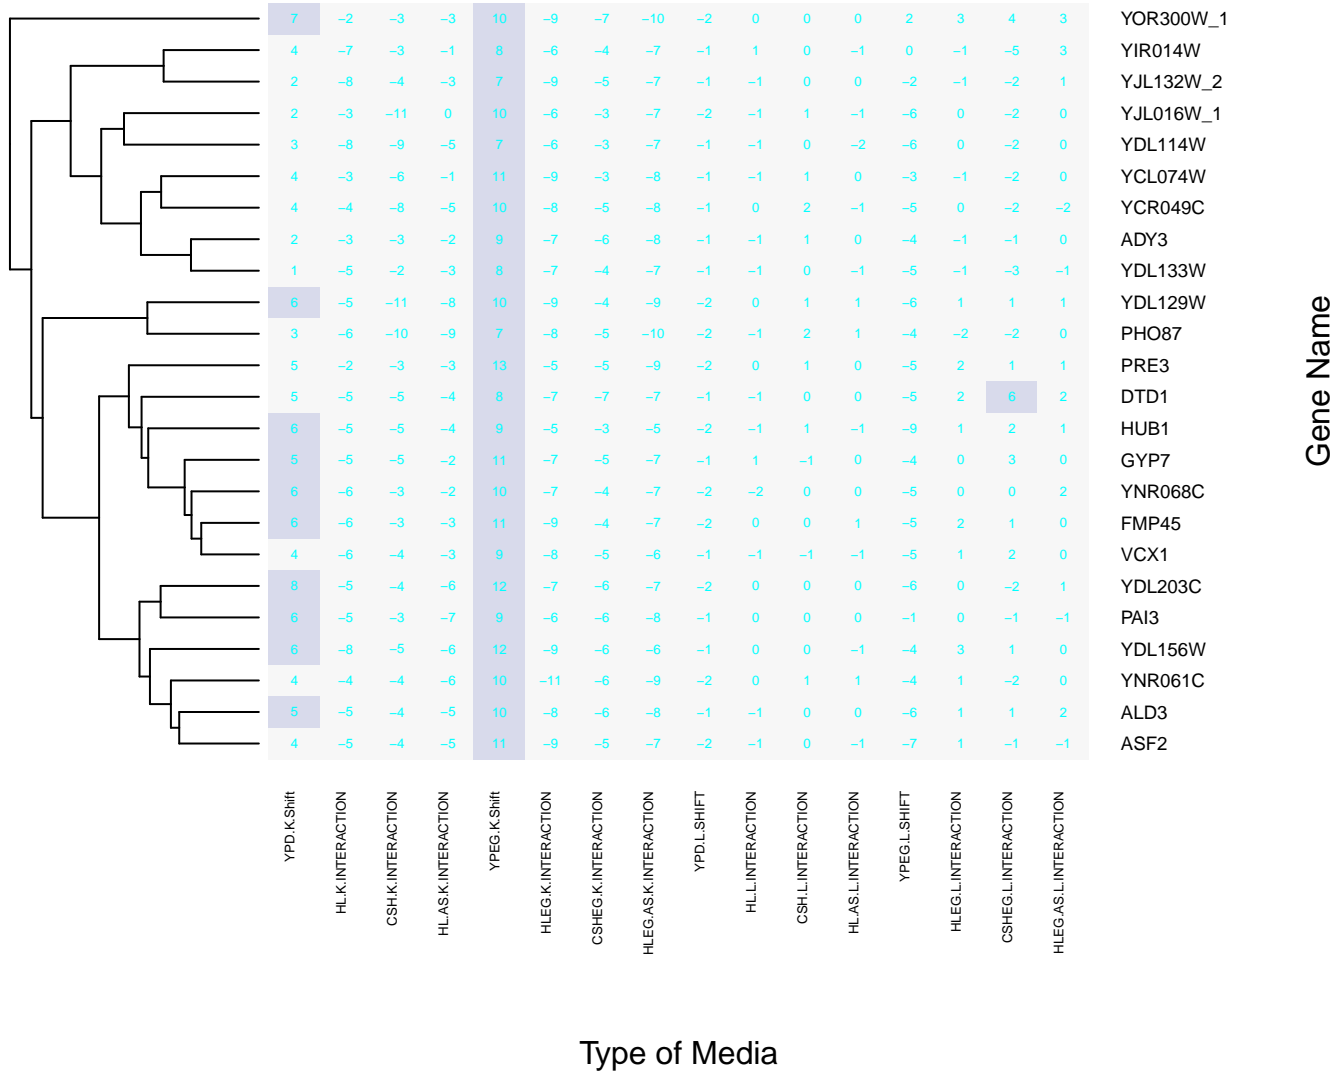

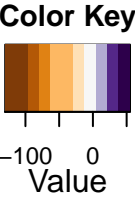

5-0.2.4.4.2-0

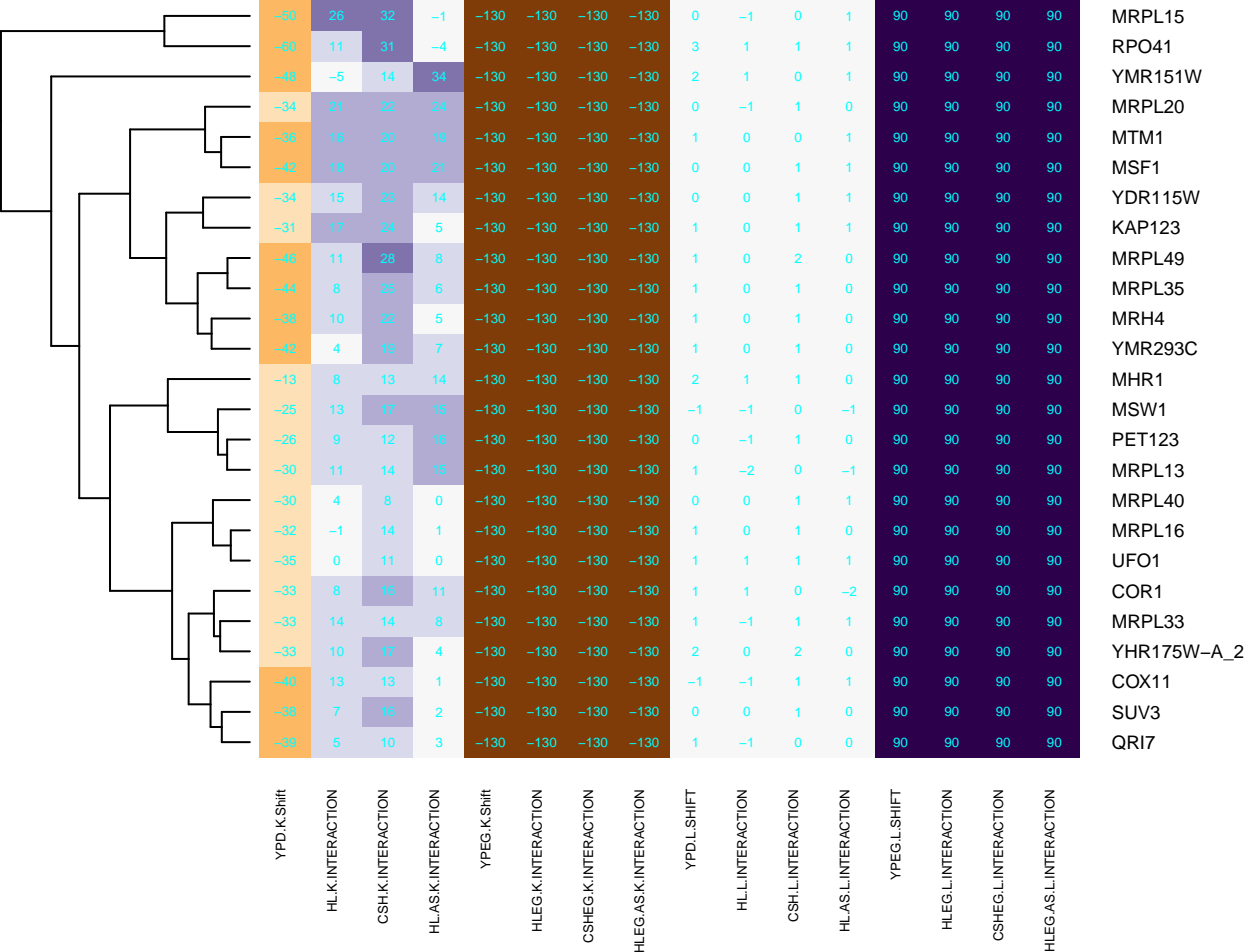

Gene Name

Type of Media

Color Key



5-0.2.4.4.2-1

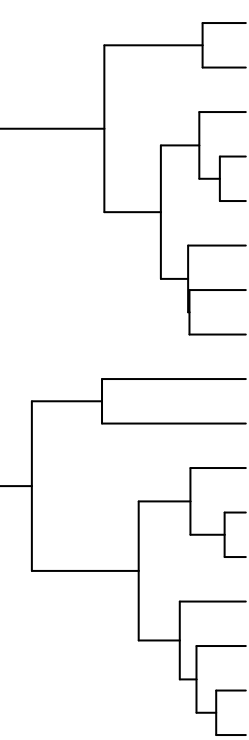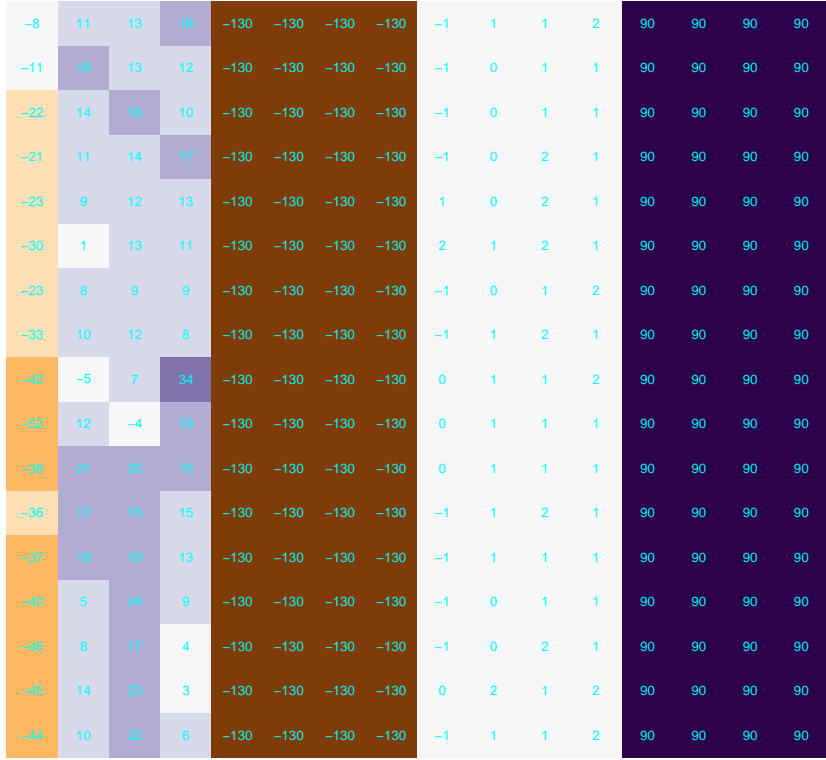

COX14  
RSM23  
MRP21  
SSA4  
MTF2  
QCR7  
PET54  
RSM18  
IMP1  
QRI5  
MRPL6  
PET117  
MSR1  
COQ8  
YGP1  
RSM27  
MSM1

Gene Name

YPD.K.Shift  
HLK.INTERACTION  
CSH.K.INTERACTION  
HLAS.K.INTERACTION  
  
YPEG.K.Shift  
HLEG.K.INTERACTION  
CSHEG.K.INTERACTION  
HLEGAS.K.INTERACTION  
  
YPDL.Shift  
HLL.INTERACTION  
CSHL.INTERACTION  
HLASL.INTERACTION  
  
YPEGL.Shift  
HLEGL.INTERACTION  
CSHEGL.INTERACTION  
HLEGASL.INTERACTION

Type of Media

Color Key

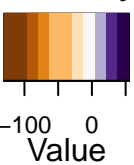

5-0.2.4.4.4-0

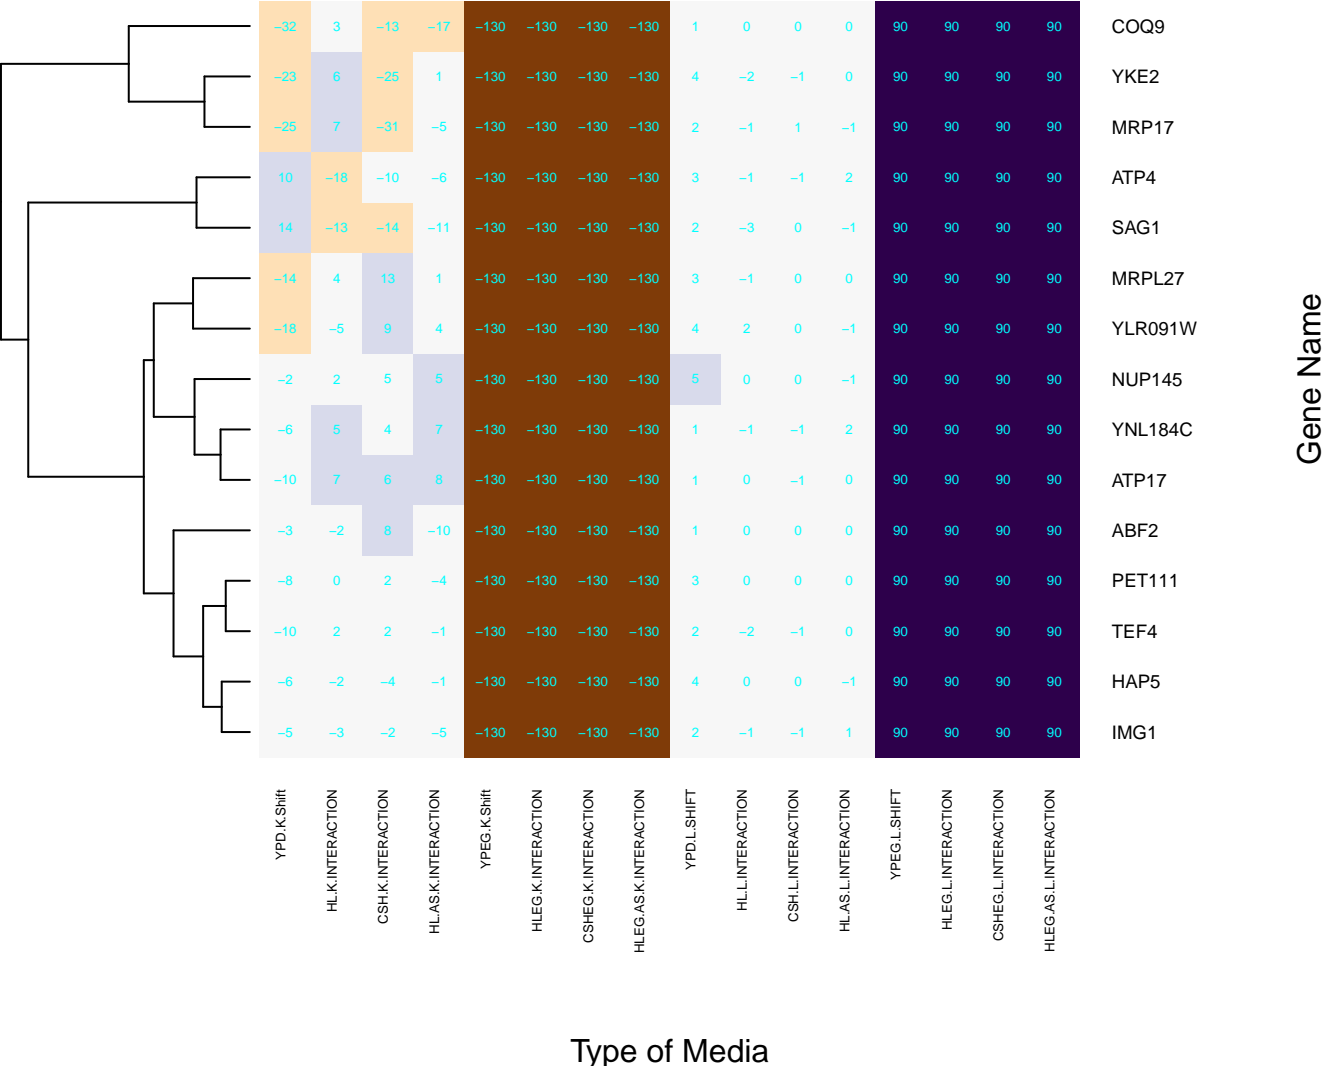

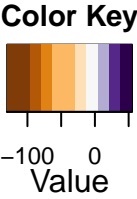

5-0.2.4.4.4-1

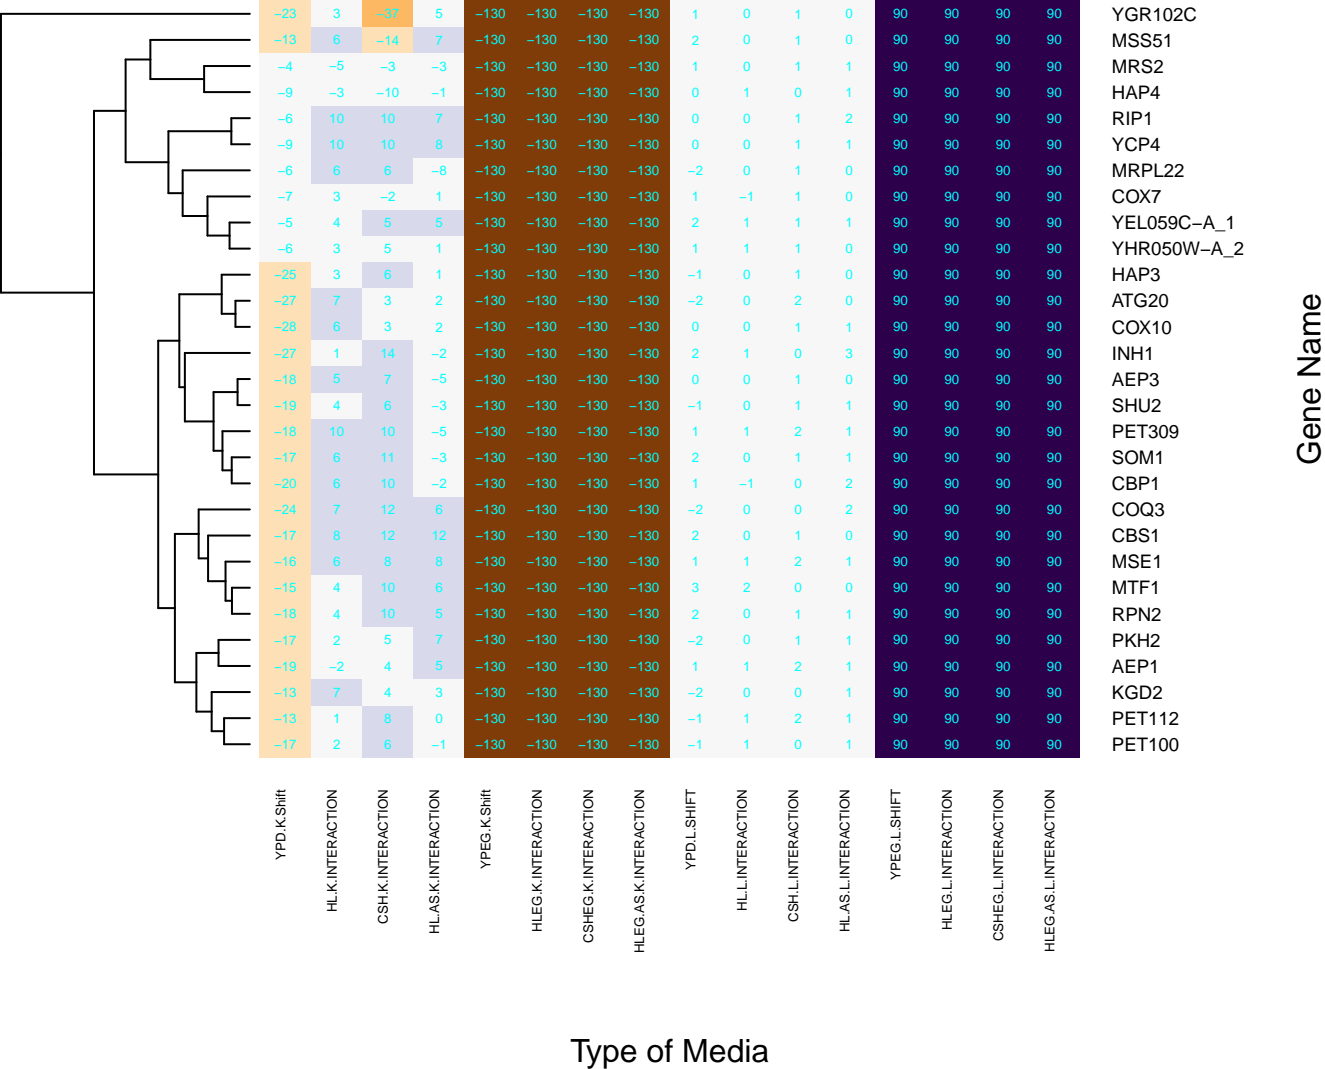

Color Key

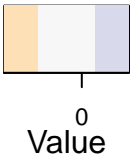

5-0.5.17.0.0-0

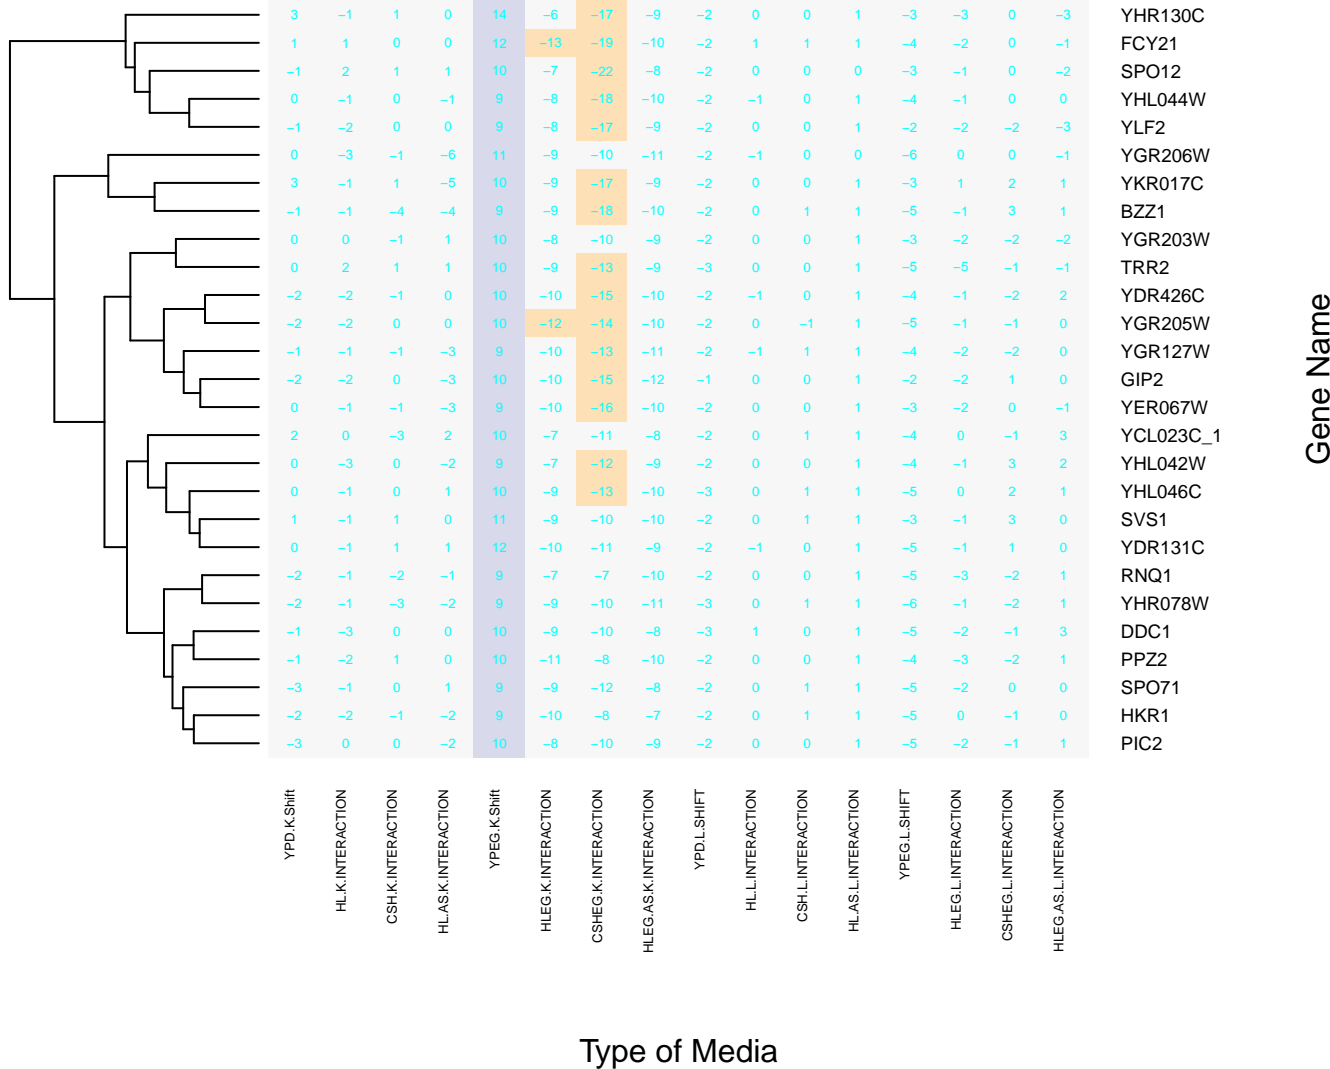

Color Key

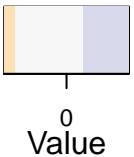

5-0.5.17.0.0-1

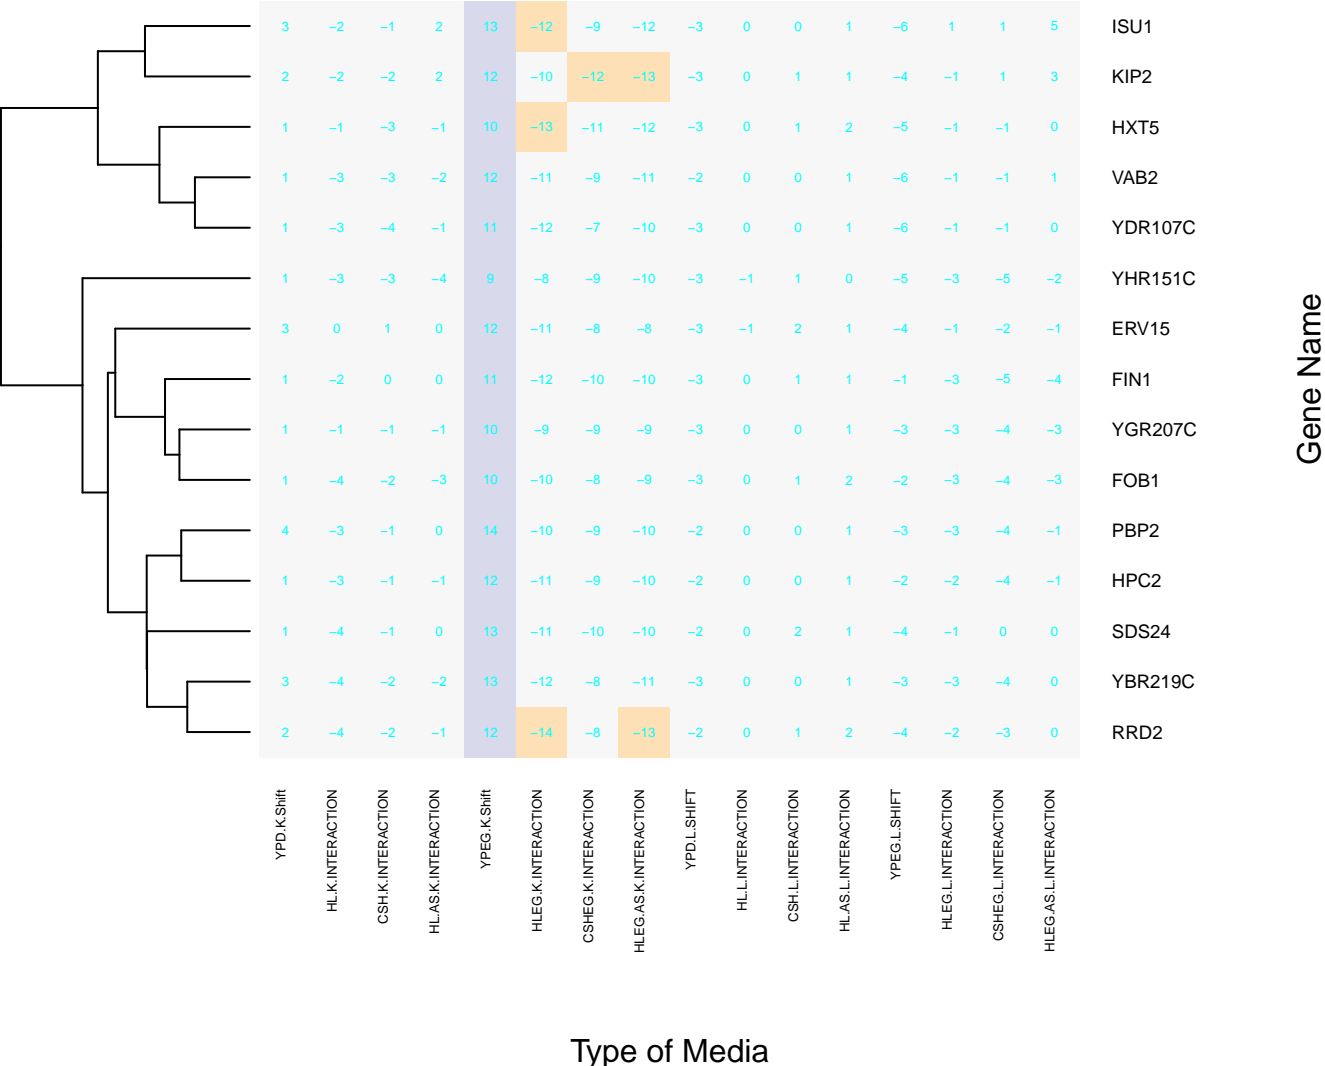

Color Key

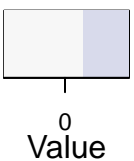

5-0.5.17.1.2-0

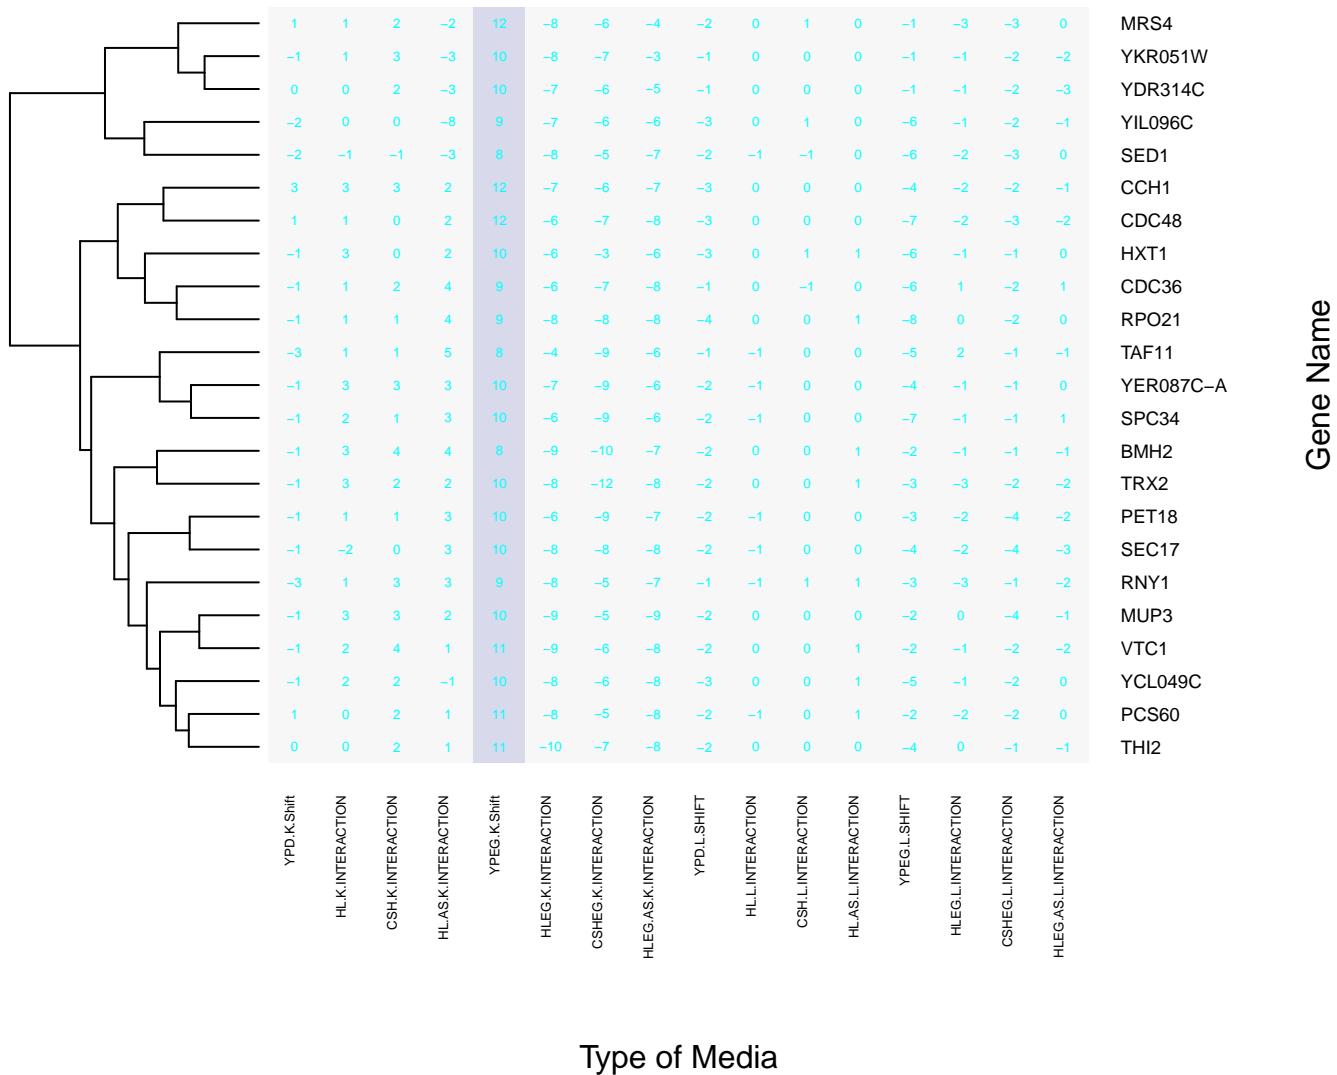

Type of Media

Color Key

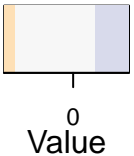

5-0.5.17.1.2-1

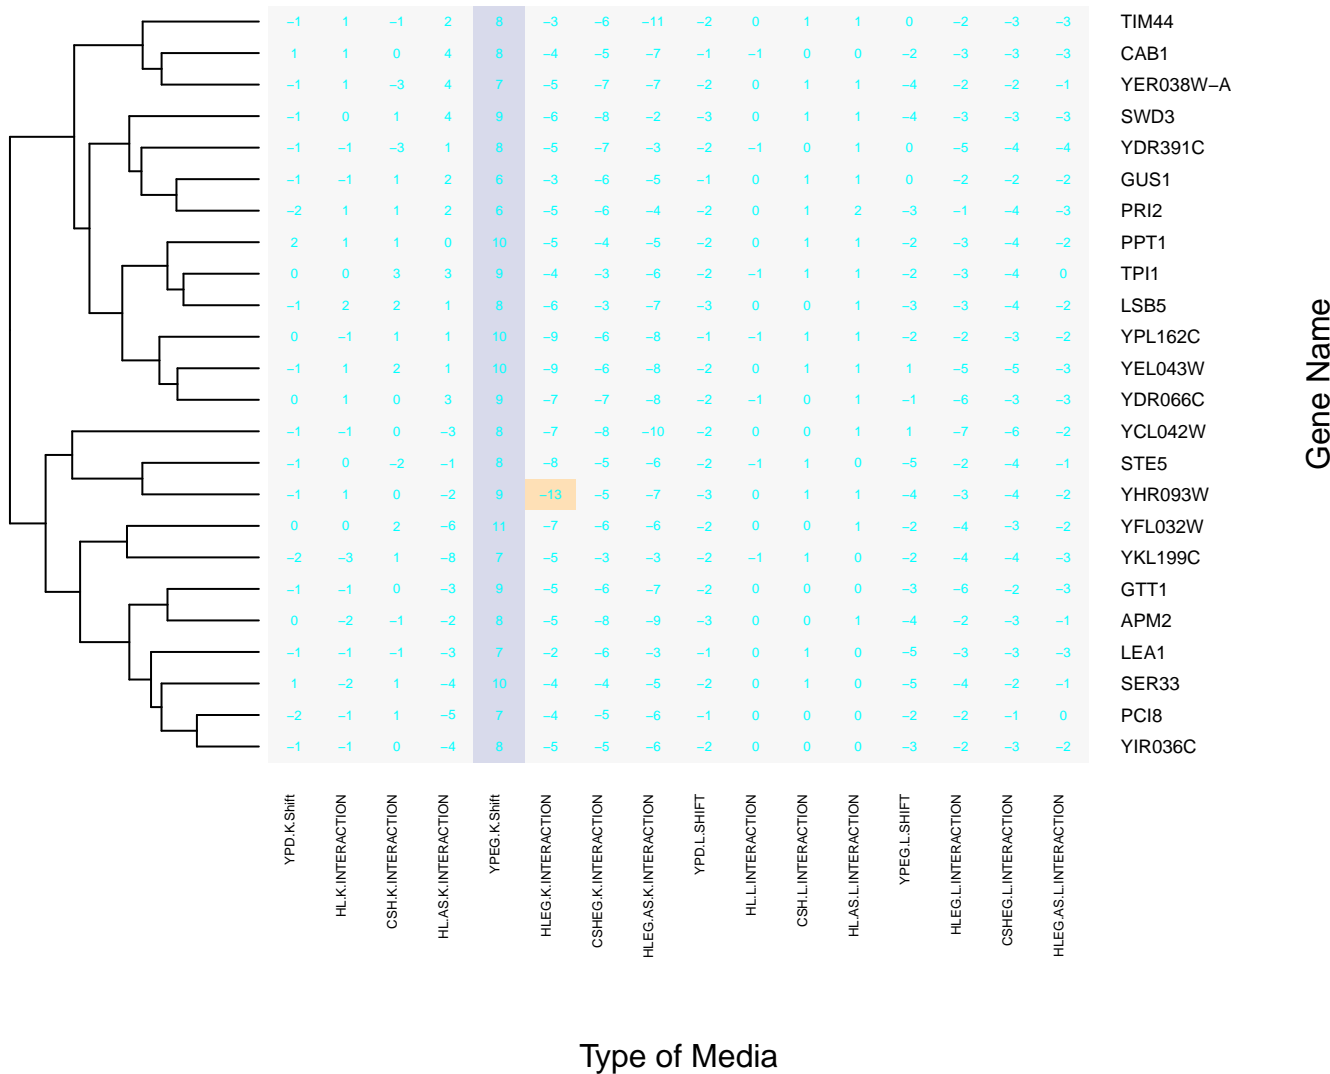



6-0.2.4.4.1-0

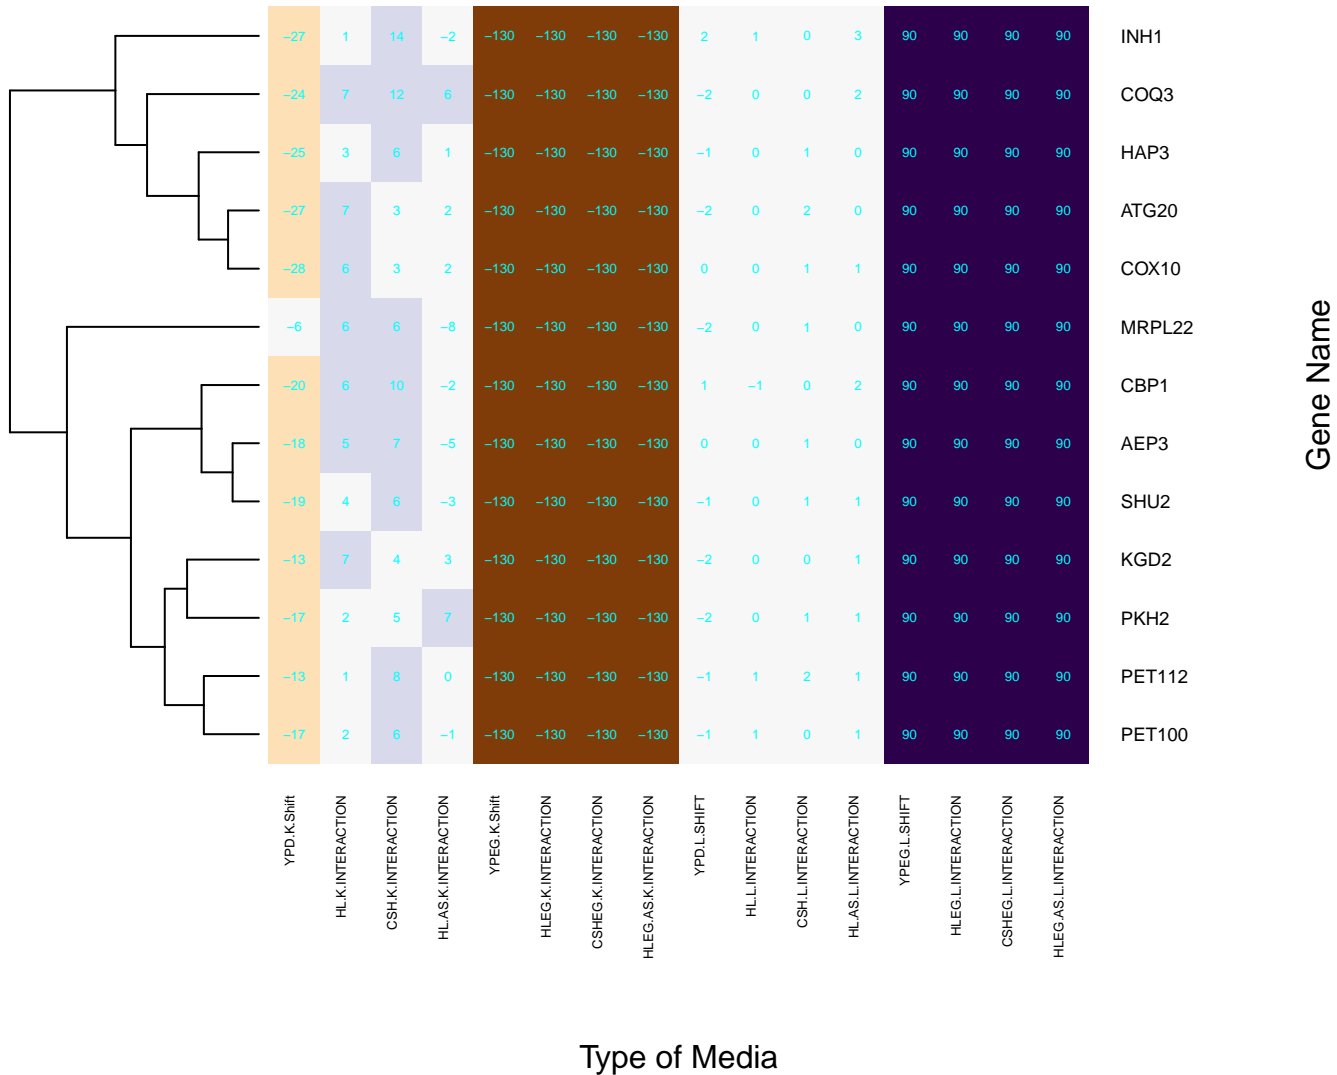

Color Key



6-0.2.4.4.1-1

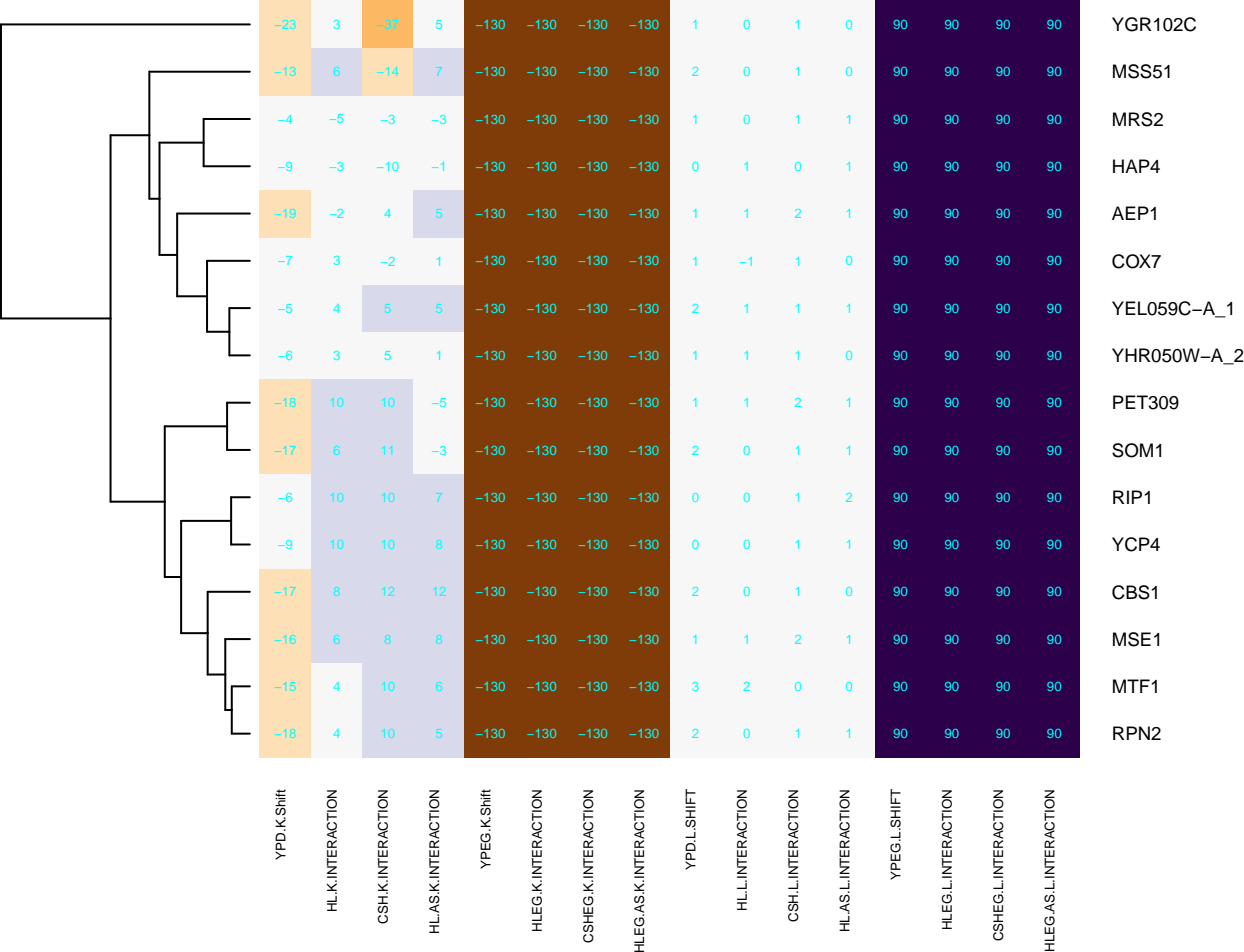

Gene Name

Type of Media
